# Supplementary material for: Enzymatic protein fusions with 100% product yield
Source: eLife. 2025 Apr 1;13:RP102765. doi: 10.7554/eLife.102765 (PMC11961121; doi:10.7554/eLife.102765)
Supplement: Appendix 1—figure 3—source data 1. [file elife-102765-app1-fig3-data1.xlsx]

## Sheet: 3A - Ub+MBP
"main" peak (10-120 kDa)		RT: 4.2-6.3-min
#	m/z	Res.	S/N	I	FWHM
1	10008.4	1489	44.6	261	6.7		Note: Shown is a list of detected masses, after charge deconvolution.
2	10031.8	2485	70.2	410	4		Note 2: Many detected masses constitue background noise or deconvolution artifacts.
3	10052.6	1314	11.7	68	7.7
4	10172.1	1796	7.1	41	5.7
5	10190.6	1630	142.6	833	6.3
6	10319.4	2174	43.3	253	4.7
7	10333.8	1531	68.5	400	6.8
8	10347.4	1444	3.1	18	7.2
9	10370.4	1722	271.2	1583	6
10	10380.4	1663	18.1	106	6.2
11	10474.4	1294	2.7	16	8.1
12	10586.4	1237	54.4	317	8.6
13	10612.4	1462	40.4	236	7.3
14	10631.6	2685	2.9	17	4
15	10791.2	1862	189.6	1107	5.8
16	10807.7	2029	2.8	16	5.3
17	10851.8	1344	9.1	53	8.1
18	10914.9	2585	18.5	108	4.2
19	11053.5	1674	2.5	15	6.6
20	11210.1	2966	2.2	13	3.8
21	11234	2499	438.1	2558	4.5
22	11300.4	1590	295.2	1724	7.1
23	11551.4	2108	59.4	347	5.5
24	11624.2	1339	282.4	1649	8.7
25	11637.5	1551	15	87	7.5
26	11703	1438	138.7	810	8.1
27	11710.7	1017	130	759	11.5
28	11767.6	1855	9.2	53	6.3
29	11832.4	1731	2	12	6.8
30	11849.5	2329	5.3	31	5.1
31	11869.5	2277	1.8	10	5.2
32	11940.9	1194	2.5	15	10
33	11991.8	1713	19.8	116	7
34	12066.1	1393	63.6	371	8.7
35	12086.6	1893	4.6	27	6.4
36	12137.5	2470	2.4	14	4.9
37	12216.6	1790	10.2	60	6.8
38	12231	1528	27.9	163	8
39	12284.8	2558	2.4	14	4.8
40	12323.1	2121	78.8	460	5.8
41	12359.7	1426	16.5	96	8.7
42	12372.3	2195	125	730	5.6
43	12386.9	2027	57.5	336	6.1
44	12402.6	2256	2.2	13	5.5
45	12432.8	1595	8.7	51	7.8
46	12456.4	1729	34.1	199	7.2
47	12918.4	2224	9	53	5.8
48	13090.4	1750	632012	3689808	7.5
49	13111.4	1173	33464.2	195370	11.2
50	13132.4	1941	17598.4	102743	6.8
51	13146.6	2024	17785.5	103835	6.5
52	13162.3	2130	15238.9	88967	6.2
53	13189.1	2792	1554.8	9077	4.7
54	13268.6	1790	92706	541235	7.4
55	13288.4	2886	2.5	14	4.6
56	13330.3	1843	102285	597160	7.2
57	13348.6	1726	52307.4	305380	7.7
58	13370.7	2120	1.9	11	6.3
59	13410.4	1863	94830.4	553638	7.2
60	13429.5	3033	6.1	35	4.4
61	13490.3	1917	45404.6	265080	7
62	13509.1	3115	1766.9	10316	4.3
63	13570.6	2372	11449.6	66845	5.7
64	13587.9	2638	1004.5	5864	5.2
65	13650	1978	34627.4	202161	6.9
66	13730.4	3268	8.6	50	4.2
67	13794	1508	1.9	11	9.1
68	13810.8	2447	72.6	424	5.6
69	13828.3	2498	1790.3	10452	5.5
70	13844.1	1486	20.2	118	9.3
71	14115.5	1760	5829.4	34033	8
72	14147.9	3169	75.9	443	4.5
73	14175.5	3472	14.3	84	4.1
74	14381.7	1540	2.9	17	9.3
75	14395.9	1449	3.8	22	9.9
76	14446	1324	1.7	10	10.9
77	14466.6	1607	116.5	680	9
78	14529.4	1643	31578.5	184361	8.8
79	14549.6	1891	530.4	3097	7.7
80	14632.1	1298	24.5	143	11.3
81	14656.5	2049	69.9	408	7.2
82	14695.8	2264	574.6	3355	6.5
83	14750.8	2223	13.9	81	6.6
84	14835.6	2183	68.1	397	6.8
85	14897.6	2512	37.1	217	5.9
86	14946	2991	6	35	5
87	14988	1985	5.7	34	7.5
88	15010.1	2897	5.5	32	5.2
89	15048.7	3403	61.3	358	4.4
90	15080.1	1768	2.4	14	8.5
91	15161.2	1340	8.3	48	11.3
92	15171.3	1467	10.1	59	10.3
93	15185.8	2590	3.6	21	5.9
94	15282.8	4170	2.9	17	3.7
95	15286.2	5022	3.3	19	3
96	15318.9	2865	2.2	13	5.3
97	15385.6	2188	6.2	36	7
98	15465.9	2686	11.1	65	5.8
99	15758.2	1579	8.8	51	10
100	15775.8	1884	33.7	197	8.4
101	15844.5	2567	30.7	179	6.2
102	15980	2112	19	111	7.6
103	15996.5	1453	7	41	11
104	16021.3	1795	2.3	13	8.9
105	16089.3	2125	15.5	91	7.6
106	16117.6	2590	2.1	12	6.2
107	16139.8	2562	7	41	6.3
108	16186.7	1882	2.5	14	8.6
109	16211.7	1880	26	152	8.6
110	16289.8	2574	31	181	6.3
111	16360.9	1851	12.7	74	8.8
112	16386.4	2097	470	2744	7.8
113	16415.5	2542	11.6	68	6.5
114	16431.7	3091	14.6	85	5.3
115	16487.1	2519	14.7	86	6.5
116	16588.6	2033	47.5	277	8.2
117	16607.6	3014	5.2	30	5.5
118	16670.3	2760	5	29	6
119	16680.8	2534	4.1	24	6.6
120	16729.8	3545	15.9	93	4.7
121	16759.4	1933	62.1	362	8.7
122	16784.3	1751	7.6	44	9.6
123	16940.7	1766	13	76	9.6
124	16959.2	2297	87.9	513	7.4
125	17085.2	2662	7.2	42	6.4
126	17167.6	2516	38.4	224	6.8
127	17178.2	2014	22.7	133	8.5
128	17246	2473	181.8	1061	7
129	17325.8	4688	4.2	24	3.7
130	17438	2066	102.6	599	8.4
131	17458.8	1946	237.2	1385	9
132	17477.2	2215	2.9	17	7.9
133	17546	2757	2.9	17	6.4
134	17689.5	1786	3.2	19	9.9
135	17769	2328	928.7	5422	7.6
136	17849.4	2649	2.1	13	6.7
137	17876.9	1993	7.7	45	9
138	17909.9	2737	7.9	46	6.5
139	17986.9	1716	11.2	66	10.5
140	18009.2	3376	81.6	476	5.3
141	18085.7	2150	82517.4	481752	8.4
142	18106.1	2477	231.8	1353	7.3
143	18152.7	1407	3.9	23	12.9
144	18186.6	2333	17.4	102	7.8
145	18201.4	2001	11.1	65	9.1
146	18356.4	5567	4.7	28	3.3
147	18577.6	2626	2.2	13	7.1
148	18685.3	2796	11.5	67	6.7
149	18708.8	2318	3.6	21	8.1
150	18725.6	3553	84.9	496	5.3
151	18883.7	2864	7	41	6.6
152	18906.4	1629	91.1	532	11.6
153	18943.3	3189	10.4	61	5.9
154	19010.3	2963	4.6	27	6.4
155	19168.4	3041	16.4	96	6.3
156	19249	2142	17.8	104	9
157	19278.2	2786	94.7	553	6.9
158	19331.7	3037	3.7	21	6.4
159	19369.5	4804	336.7	1966	4
160	19395.5	2981	7.8	46	6.5
161	19480.6	2516	15.1	88	7.7
162	19510.1	3257	6.1	36	6
163	19606.3	3057	76.6	447	6.4
164	19627	2462	324.9	1897	8
165	19668.7	1881	41.6	243	10.5
166	19702.3	2382	5.4	32	8.3
167	19721.3	2470	276.7	1616	8
168	19743.3	2478	4	23	8
169	19899.5	2335	7.3	42	8.5
170	19979.3	1782	10.6	62	11.2
171	19993.7	1462	48.9	286	13.7
172	20017.4	1935	172.1	1005	10.3
173	20064.1	3304	263	1536	6.1
174	20113.4	1895	100.9	589	10.6
175	20235.6	1803	10.6	62	11.2
176	20292.7	2657	17	99	7.6
177	20357.1	2191	376.6	2199	9.3
178	20382.4	4173	1466	8559	4.9
179	20473.5	2630	34.8	203	7.8
180	20637.1	3645	7.7	45	5.7
181	20664	2508	7.2	42	8.2
182	20679.8	2751	8.3	48	7.5
183	20691.8	1735	7.3	43	11.9
184	20739.2	1632	433.5	2531	12.7
185	20757.2	2065	139.9	817	10.1
186	20788.6	2087	73.8	431	10
187	20849.8	3499	4.7	27	6
188	20983	2165	3.3	19	9.7
189	21102.9	2561	32.5	190	8.2
190	21144.6	1718	369.9	2160	12.3
191	21173.2	2408	19709.4	115067	8.8	Deconvolution artefact
192	21223.8	1907	3171.8	18518	11.1
193	21231.3	2503	2154.5	12578	8.5
194	21263.6	4077	299.1	1746	5.2
195	21302.6	4250	17.8	104	5
196	21357.8	3415	7.3	42	6.3
197	21558.5	2371	3	18	9.1
198	21582.4	1418	79.4	464	15.2
199	21607.9	2271	87.8	513	9.5
200	21646.7	2951	4.3	25	7.3
201	21697	2506	2.1	12	8.7
202	21795.9	2317	35.7	208	9.4
203	21827	2483	17.4	101	8.8
204	21889.2	3913	2.5	14	5.6
205	21950	2429	2	12	9
206	21981.3	2839	7.4	43	7.7
207	22048.9	1600	3	18	13.8
208	22086.1	1692	3.1	18	13.1
209	22112.4	1872	18	105	11.8
210	22219.7	1571	8.7	51	14.1
211	22251.2	3293	13.3	78	6.8
212	22345.7	2204	301.6	1761	10.1
213	22374.2	2276	3.9	23	9.8
214	22420.8	5756	265.9	1552	3.9
215	22452.2	2649	7.8	45	8.5
216	22467.6	3495	17.7	104	6.4
217	22483	1542	10.5	61	14.6
218	22514.5	3523	1.8	11	6.4
219	22555.5	2945	3.6	21	7.7
220	22612.9	2075	68.9	402	10.9
221	22632.4	2493	5.4	31	9.1
222	22733.8	2575	9.2	54	8.8
223	22747.5	1808	25	146	12.6
224	22781.2	2430	2	12	9.4
225	22865	2327	13.6	79	9.8
226	22879.3	1715	6	35	13.3
227	23015	4098	10.1	59	5.6
228	23102.6	2378	34.6	202	9.7
229	23154.2	2781	3.6	21	8.3
230	23249.7	2393	10	58	9.7
231	23280.4	2178	6.2	36	10.7
232	23334.4	2245	3.2	19	10.4
233	23403.6	2960	12.2	71	7.9
234	23431.4	4308	22.4	131	5.4
235	23509.6	2935	3.5	20	8
236	23582.9	3114	6.1	36	7.6
237	23613.4	2218	4.7	28	10.6
238	23696.1	3061	3.3	19	7.7
239	23736.2	3052	14.5	85	7.8
240	23871.8	2016	24.3	142	11.8
241	23978	2849	2.3	14	8.4
242	23990.3	1930	7.8	46	12.4
243	24006.8	2962	14.5	84	8.1
244	24035.7	3834	2.4	14	6.3
245	24077.9	3530	17.1	100	6.8
246	24138.7	2241	35.8	209	10.8
247	24215.3	2329	49.1	286	10.4
248	24306.9	2600	104.7	611	9.3
249	24335.5	3935	8	47	6.2
250	24344.2	2675	3.8	22	9.1
251	24438	1947	25.4	148	12.6
252	24451.2	6438	105.1	614	3.8
253	24459.5	6004	68	397	4.1
254	24467	6480	120.7	705	3.8
255	24551.1	2360	2.7	16	10.4
256	24563.8	2169	5	29	11.3
257	24643.1	2665	2.2	13	9.2
258	24698	1713	3.2	18	14.4
259	24710.5	2765	2.4	14	8.9
260	24723.9	2564	13.7	80	9.6
261	24740	2335	17.5	102	10.6
262	24771	3276	18.4	108	7.6
263	24863.6	2119	6.1	36	11.7
264	24882	1761	8.7	51	14.1
265	24910.4	2802	8.2	48	8.9
266	25061.1	3666	43.5	254	6.8
267	25178.1	2631	10.2	59	9.6
268	25215.3	3601	15.2	89	7
269	25242.7	3227	9	53	7.8
270	25245.8	3399	9.8	57	7.4
271	25327.3	2173	37.7	220	11.7
272	25362	2821	86.6	505	9
273	25407.5	2361	103.7	605	10.8
274	25444.7	2219	20	117	11.5
275	25479.2	5117	572.2	3341	5
276	25486.5	6046	881.9	5148	4.2
277	25518.6	2736	65	379	9.3
278	25560.7	2873	14.1	83	8.9
279	25585.8	2922	10.2	60	8.8
280	25631.3	3703	35.4	207	6.9
281	25778.8	2295	3.2	19	11.2
282	25823.2	2396	3.3	19	10.8
283	25831.8	1749	3	17	14.8
284	25866.1	2838	1.8	10	9.1
285	25932.9	2418	7	41	10.7
286	26128.5	2636	7.5	44	9.9
287	26147.2	3232	103.2	603	8.1
288	26158	2438	244.2	1426	10.7
289	26179.3	1804	1923.3	11228	14.5
290	26216.2	2060	1532.9	8949	12.7
291	26264	2520	490.8	2865	10.4
292	26291.5	2935	161.5	943	9
293	26323.8	3242	556.1	3246	8.1
294	26379.6	3853	306.2	1788	6.8
295	26540	2304	236.7	1382	11.5
296	26659.5	2735	225.9	1319	9.7
297	26697.5	2408	437.5	2554	11.1
298	26817.3	2308	313.9	1832	11.6
299	26862.6	3212	13.7	80	8.4
300	26905.6	2679	2.1	12	10
301	26980.9	2121	584.5	3412	12.7
302	27015.9	3373	127.9	747	8
303	27139.6	2481	1119.5	6536	10.9
304	27172.8	3409	36.9	215	8
305	27300.6	2046	745.8	4354	13.3
306	27439.4	3446	100.7	588	8
307	27458.3	2749	96.2	561	10
308	27491.2	2449	7.6	45	11.2
309	27516.9	8003	3.6	21	3.4
310	27525.8	7623	9	52	3.6
311	27573.5	2216	6.6	38	12.4
312	27604.1	2039	44.1	257	13.5
313	27615	2954	59.4	347	9.3
314	27638.2	2261	27	158	12.2
315	27654.2	3009	205.4	1199	9.2
316	27691.5	3024	14.8	86	9.2
317	27726.1	2290	7.7	45	12.1
318	27778.6	3095	10.1	59	9
319	27946.9	2561	256.9	1500	10.9
320	28143.9	3496	3.6	21	8.1
321	28203.2	1755	15.2	89	16.1
322	28230.5	1910	20.8	122	14.8
323	28253.2	1932	39.9	233	14.6
324	28351.2	4121	4.8	28	6.9
325	28489.6	3467	9.3	54	8.2
326	28526	4332	19.6	114	6.6
327	28535.9	6746	110.4	644	4.2
328	28554.1	6573	3.8	22	4.3
329	28577.9	2719	6.8	40	10.5
330	28761.4	2461	7.7	45	11.7
331	28799.2	2887	17	99	10
332	28936.4	2785	9.3	54	10.4
333	29059.4	2450	1432.5	8363	11.9
334	29102.7	2441	85.9	501	11.9
335	29138.1	2808	2.2	13	10.4
336	29187.9	2232	6.7	39	13.1
337	29204.7	2267	17.1	100	12.9
338	29237.2	3318	1.9	11	8.8
339	29307.1	3682	3.3	19	8
340	29318.8	1844	9	52	15.9
341	29383.5	2730	15.7	92	10.8
342	29403.6	2720	1.9	11	10.8
343	29424.9	2477	5.6	33	11.9
344	29505.8	2566	41.8	244	11.5
345	29545.6	7169	4.6	27	4.1
346	29554.6	7143	2.1	13	4.1
347	29583.3	5176	3.6	21	5.7
348	29622.9	2732	7.1	41	10.8
349	29672.3	2834	31.8	186	10.5
350	29793.2	2634	5.7	33	11.3
351	29809.4	4590	2	12	6.5
352	29833.2	2804	5.8	34	10.6
353	29849.5	1941	2.5	14	15.4
354	29981.8	2326	1.9	11	12.9
355	30024.2	3298	94.1	549	9.1
356	30096.7	4660	2255	13165	6.5
357	30135.2	2810	7.4	43	10.7
358	30151.2	1621	13.5	79	18.6
359	30165	1601	14.8	86	18.8
360	30211.9	3107	8.2	48	9.7
361	30269.7	3538	5.9	34	8.6
362	30319.4	2916	3.8	22	10.4
363	30330.6	1966	5.7	33	15.4
364	30375.1	3575	11.3	66	8.5
365	30522.6	2339	47	274	13
366	30542.3	1978	15.5	91	15.4
367	30552.6	2722	10.9	64	11.2
368	30562.7	5743	7.6	45	5.3
369	30574.3	7825	12.2	71	3.9
370	30583.4	7557	4	23	4
371	30668.8	2270	33.8	197	13.5
372	30708.8	2527	20.6	120	12.2
373	30768.8	3361	58.6	342	9.2
374	30848	2997	30.1	176	10.3
375	30868.1	2924	25	146	10.6
376	30932.7	2668	2.8	16	11.6
377	30954.5	2233	9.6	56	13.9
378	31007.7	3651	23.8	139	8.5
379	31104.4	2532	29.3	171	12.3
380	31144.9	3119	16	93	10
381	31208.6	3965	4.2	25	7.9
382	31272.6	2390	9	53	13.1
383	31291	1730	6.2	36	18.1
384	31328.3	3475	4.9	29	9
385	31417.6	2557	2.4	14	12.3
386	31474.3	2814	2	11	11.2
387	31488.1	3327	6.4	37	9.5
388	31517.7	3084	26.3	154	10.2
389	31560.4	2270	18.2	106	13.9
390	31582.3	7018	1.7	10	4.5
391	31652.3	2600	2.6	15	12.2
392	31702.6	3837	154.3	901	8.3
393	31757.2	2150	11.8	69	14.8
394	31789.7	3317	4.4	25	9.6
395	31843.5	2980	9.2	54	10.7
396	31895.8	3758	2.3	14	8.5
397	31960.6	1604	18.9	110	19.9
398	31997.9	1646	31.3	183	19.4
399	32036.6	2785	18.6	109	11.5
400	32179.5	3124	43.4	253	10.3
401	32221.3	2410	7.8	46	13.4
402	32278.9	2900	8.1	47	11.1
403	32337	3443	16	93	9.4
404	32376.3	2430	25.3	148	13.3
405	32419.2	2101	31.7	185	15.4
406	32561.4	4301	3.4	20	7.6
407	32577.1	3341	8.7	51	9.8
408	32720.9	2985	66.2	386	11
409	32739.2	1801	76.9	449	18.2
410	32759.7	2588	128.1	748	12.7
411	32779.1	2158	316.5	1848	15.2
412	32832.5	3083	16.5	96	10.6
413	32865.1	4249	7.9	46	7.7
414	32922.3	3526	3.6	21	9.3
415	32974.5	3180	61.2	357	10.4
416	33026.7	3983	3.4	20	8.3
417	33168.8	2401	146.7	856	13.8
418	33216.1	3182	4.9	29	10.4
419	33320.7	2340	37	216	14.2
420	33339.1	2627	59.9	350	12.7
421	33365.4	3988	47.6	278	8.4
422	33376	4332	61.5	359	7.7
423	33413	2987	6.8	40	11.2
424	33460.9	4248	5.1	30	7.9
425	33521.7	2328	43.2	252	14.4
426	33535.4	2304	51.4	300	14.6
427	33561.6	2899	17.5	102	11.6
428	33575	2971	6.1	35	11.3
429	33631.3	8833	6.6	38	3.8
430	33664.4	6277	5.8	34	5.4
431	33704.3	2774	82.2	480	12.2
432	33721.4	1463	62.2	363	23.1
433	33769.1	3328	12.8	75	10.1
434	33900.8	4636	41.4	242	7.3
435	33918.1	3183	196.5	1147	10.7
436	34035.9	2521	17	99	13.5
437	34066.3	3194	38.1	223	10.7
438	34079.5	4171	12.2	71	8.2
439	34126	2753	34.8	203	12.4
440	34172.9	4713	63.7	372	7.3
441	34270.3	2697	4.6	27	12.7
442	34288.5	2552	10.6	62	13.4
443	34332.3	3890	9.5	56	8.8
444	34360.7	3007	42.6	249	11.4
445	34499.7	2366	84.2	492	14.6
446	34651.3	6890	2253.4	13156	5
447	34707.2	2673	51.7	302	13
448	34873.4	2511	234.6	1370	13.9
449	34895.5	2526	36.4	213	13.8
450	34916.5	2343	54.8	320	14.9
451	34969.6	4723	3	17	7.4
452	34981.3	6604	7.7	45	5.3
453	35088.3	2941	11.6	68	11.9
454	35115.4	2615	45	263	13.4
455	35127.1	2636	53.9	315	13.3
456	35171.5	3636	66.9	391	9.7
457	35287.8	2241	37.5	219	15.7
458	35337.9	2416	15.5	90	14.6
459	35376.7	2867	5.1	30	12.3
460	35436.7	4008	2.8	16	8.8
461	35501.3	3332	47	274	10.7
462	35519.9	2800	22	129	12.7
463	35538.5	2887	73.3	428	12.3
464	35607.9	2974	1.9	11	12
465	35658.2	8229	7.6	45	4.3
466	35669.4	7412	4.2	24	4.8
467	35695	4984	11.2	65	7.2
468	35702.8	3702	12.8	75	9.6
469	35760.2	3887	6.4	38	9.2
470	35775.5	4165	3.7	21	8.6
471	35825.5	3477	49.3	288	10.3
472	35907.8	3031	2.4	14	11.8
473	35988.2	3147	20.5	120	11.4
474	36013.4	3469	6.7	39	10.4
475	36035.4	3272	2.3	13	11
476	36117.5	3759	3.6	21	9.6
477	36172.9	2473	1643.3	9594	14.6
478	36183.4	2502	1774.9	10362	14.5
479	36199	2599	920.7	5375	13.9
480	36258.5	3329	2.8	17	10.9
481	36308.8	2537	4.9	28	14.3
482	36325.2	2484	2.6	15	14.6
483	36368.3	2612	5.5	32	13.9
484	36408.9	4119	15.3	89	8.8
485	36479.8	3597	9.7	57	10.1
486	36504.5	2766	4.6	27	13.2
487	36517.9	4994	2.5	15	7.3
488	36643.5	2575	35.5	207	14.2
489	36654.4	2776	27.9	163	13.2
490	36676.9	8397	21.5	126	4.4
491	36688.9	8649	26.6	155	4.2
492	36700.9	8739	29.7	173	4.2
493	36712.6	8165	11	65	4.5
494	36856.6	2880	27.1	158	12.8
495	36880.4	2071	5.3	31	17.8
496	36934.9	3295	9.3	54	11.2
497	36974	4733	4.3	25	7.8
498	37045	3228	7.6	44	11.5
499	37081.3	2385	68.6	400	15.5
500	37125.1	2126	81.9	478	17.5
501	37144.9	2660	160.9	939	14
502	37162.7	2325	213.2	1245	16
503	37262.3	2524	5	29	14.8
504	37314.9	2653	41.4	242	14.1
505	37368.5	3589	76.7	448	10.4
506	37456.9	3067	7.9	46	12.2
507	37532.6	3214	78.2	456	11.7
508	37696	7517	2.4	14	5
509	37707.9	8486	3.6	21	4.4
510	37721	7973	7.1	41	4.7
511	37732.2	6315	6.7	39	6
512	37744.9	4059	2.9	17	9.3
513	37766.4	3284	28.9	169	11.5
514	37789	3322	7.3	43	11.4
515	37810.8	2590	87.2	509	14.6
516	37889.9	3104	21	123	12.2
517	37933.8	4037	110.1	643	9.4
518	37974.2	2921	10	58	13
519	37990.4	1846	12	70	20.6
520	38022.2	4479	69.4	405	8.5
521	38179.2	4889	5.3	31	7.8
522	38217.9	4375	6.3	37	8.7
523	38337.2	3060	14.8	86	12.5
524	38405.2	3512	4.2	25	10.9
525	38463.3	2892	132.4	773	13.3
526	38497.4	2920	20.4	119	13.2
527	38552.9	2802	141.8	828	13.8
528	38583.6	2809	27.1	158	13.7
529	38616.8	2205	31.5	184	17.5
530	38662.8	3388	48.6	284	11.4
531	38715	8449	4.8	28	4.6
532	38727.4	8976	15	87	4.3
533	38740.6	7524	88.7	518	5.1
534	38752	6248	58.1	339	6.2
535	39021.5	5287	5	29	7.4
536	39125.2	3427	2.9	17	11.4
537	39192.1	2837	11.2	66	13.8
538	39215.8	3616	251.8	1470	10.8
539	39243.3	3097	369.9	2160	12.7
540	39263.1	2031	1287.6	7517	19.3
541	39338.1	1808	310.6	1813	21.8
542	39398.6	3216	542.6	3168	12.2
543	39441.4	2306	133.4	779	17.1
544	39484.9	3960	59	344	10
545	39565.4	3930	13.4	78	10.1
546	39805	2256	392.2	2290	17.6
547	39993.3	2082	886.2	5174	19.2
548	40046.6	1853	1271.5	7423	21.6
549	40097.7	2986	36.8	215	13.4
550	40126.5	3489	13.5	79	11.5
551	40153.5	2702	5.1	30	14.9
552	40168.3	2844	2.4	14	14.1
553	40225.8	2459	692.4	4043	16.4
554	40280.5	3207	2.1	12	12.6
555	40356.9	2877	2.3	14	14
556	40470.4	49810	343.2	2004	0.8
557	40524.7	3935	67.1	392	10.3
558	40583.7	3100	26.3	153	13.1
559	40647.9	3232	9.5	55	12.6
560	40684.6	3244	53.4	312	12.5
561	40716.2	2638	2123.1	12395	15.4
562	40754.1	5724	1355.9	7916	7.1
563	40764.6	4182	2346.2	13698	9.7
564	40791.5	6487	2.5	15	6.3
565	40824.2	2982	14.9	87	13.7
566	40948.3	2490	609.3	3557	16.4
567	41008.5	3711	2.5	14	11.1
568	41022.9	2442	3.1	18	16.8
569	41193.9	3748	145.8	851	11
570	41275	3386	4.4	26	12.2
571	41286.6	4647	2.3	13	8.9
572	41326.3	3595	33.4	195	11.5
573	41361.7	5482	53.3	311	7.5
574	41381.8	3581	128.3	749	11.6
575	41402.9	2682	12.7	74	15.4
576	41459.2	3002	1158.6	6764	13.8
577	41482.4	1964	1176.6	6869	21.1
578	41516.1	2508	352.6	2058	16.6
579	41544.2	3008	39.7	232	13.8
580	41566.1	3935	171.5	1001	10.6
581	41586.8	3163	405.2	2366	13.1
582	41698.2	4620	2.9	17	9
583	41769.7	5645	3.2	19	7.4
584	42208.1	2825	4.2	25	14.9
585	42303.1	1917	8475.3	49481	22.1
586	42345.9	3253	320618	1871828	13
587	42445.5	4988	5412.8	31601	8.5
588	42466	3049	619.3	3616	13.9
589	42528	5333	2644.4	15439	8
590	42604.5	5909	93.3	545	7.2
591	42618.4	4534	12.6	74	9.4
592	43120.8	4596	84.9	496	9.4
593	43141.6	5446	181.4	1059	7.9
594	43176.6	2657	174.2	1017	16.3
595	43197.4	53166	480.5	2805	0.8
596	43209.1	1773	598.7	3496	24.4
597	43262.6	3039	20.3	118	14.2
598	43298.1	3676	58.8	343	11.8
599	43307.2	2543	67.8	396	17
600	43331.3	2183	33.5	196	19.9
601	43356.5	3462	146	852	12.5
602	43369	2669	141	823	16.3
603	43395.6	2032	114.6	669	21.4
604	43431.6	2427	12	70	17.9
605	43455	2950	4.7	27	14.7
606	43489.9	3232	4.2	25	13.5
607	43595.6	3265	429	2505	13.4
608	43691.7	5178	2.3	14	8.4
609	43837.2	9506	9.1	53	4.6
610	43852.7	5571	6.6	38	7.9
611	43894.5	3714	24.7	144	11.8
612	43958.2	3615	221.1	1291	12.2
613	43999.4	5334	8	46	8.2
614	44038.2	2989	14.2	83	14.7
615	44092.9	2814	202.9	1185	15.7
616	44143.6	2698	33.9	198	16.4
617	44168.7	2687	16.3	95	16.4
618	44223.9	3749	32.5	190	11.8
619	44360.8	3341	5.7	33	13.3
620	44433.9	3148	11.9	70	14.1
621	44503.4	3797	123.5	721	11.7
622	44656.1	2846	2	12	15.7
623	44692.1	3078	232.8	1359	14.5
624	44742.2	3751	56.7	331	11.9
625	44770.1	3212	23.6	138	13.9
626	44841.6	8137	136.9	799	5.5
627	44855.6	7130	5.5	32	6.3
628	44888.1	5374	8.8	51	8.4
629	44895.8	5023	7	41	8.9
630	44904.3	4606	6.9	40	9.8
631	44934.7	3288	3	18	13.7
632	44965.2	2603	19.6	114	17.3
633	45027.5	4069	16.1	94	11.1
634	45108	3625	14.6	85	12.4
635	45144.4	2486	2	12	18.2
636	45174.8	2411	10.9	64	18.7
637	45226.2	3976	250	1460	11.4
638	45265.9	3574	11.5	67	12.7
639	45299.7	4670	2.7	16	9.7
640	45377.8	3336	9	52	13.6
641	45426.3	2802	5	29	16.2
642	45466.8	1957	4.6	27	23.2
643	45516.6	2604	18.4	108	17.5
644	45560.9	2094	4.8	28	21.8
645	45602	2690	9.3	55	17
646	45735.9	2554	8.3	48	17.9
647	45760.7	4360	9.3	54	10.5
648	45777.3	4274	16	93	10.7
649	45814.4	3317	52.4	306	13.8
650	45845	6733	14.5	84	6.8
651	45861.5	10272	33.7	197	4.5
652	45876.3	9207	78	456	5
653	45890.7	7859	30.2	176	5.8
654	45905.9	5690	9.3	54	8.1
655	45974	3536	5.2	30	13
656	46157.4	5164	21.4	125	8.9
657	46197.2	4023	37.5	219	11.5
658	46208	3020	55.5	324	15.3
659	46252.1	3139	5	29	14.7
660	46316.4	3563	3.6	21	13
661	46328.9	2580	2.7	16	18
662	46402.7	3824	16.3	95	12.1
663	46408.4	3192	17.5	102	14.5
664	46427.4	2857	13.2	77	16.3
665	46476.1	3789	40.2	235	12.3
666	46509.4	3180	5.9	35	14.6
667	46535.4	3369	3	17	13.8
668	46552.3	4407	2.1	12	10.6
669	46649.1	4785	35.9	209	9.8
670	46656.1	4563	36.4	212	10.2
671	46720.5	2597	3.6	21	18
672	46745.7	3196	5.8	34	14.6
673	46805.6	3879	174.5	1019	12.1
674	46839.5	3710	9.8	57	12.6
675	46865.2	7932	11.4	67	5.9
676	46880.6	9101	11.3	66	5.2
677	46896	8005	11.6	68	5.9
678	46910.4	6448	19.8	116	7.3
679	46926.8	6166	21.2	124	7.6
680	46949.9	3122	21	123	15
681	47017.9	3391	21.6	126	13.9
682	47077.9	1560	1.8	11	30.2
683	47118.9	3529	2.8	16	13.4
684	47162.6	3366	21.6	126	14
685	47229.6	3096	51.5	301	15.3
686	47274.1	2186	22.2	130	21.6
687	47334.6	4025	7.3	43	11.8
688	47387.6	3362	26.9	157	14.1
689	47483	2710	14.1	82	17.5
690	47536.1	4654	47.6	278	10.2
691	47551.5	4193	44.5	260	11.3
692	47619.6	3197	1.8	10	14.9
693	47641.1	2665	1.8	11	17.9
694	47682.1	4182	16.8	98	11.4
695	47757.3	3458	34.7	203	13.8
696	47774.8	3675	42.3	247	13
697	47839.4	3264	2.9	17	14.7
698	47883.8	9206	2.1	12	5.2
699	47916	7802	5.3	31	6.1
700	47931.6	6202	24.9	145	7.7
701	47947.1	3444	23.9	139	13.9
702	47986	5369	106.9	624	8.9
703	48012.7	2357	35.9	210	20.4
704	48048	3623	22	128	13.3
705	48189.3	2240	3.1	18	21.5
706	48217.5	3195	6	35	15.1
707	48227.8	3298	4.5	26	14.6
708	48264	4243	187	1092	11.4
709	48339.4	4636	7.4	43	10.4
710	48402.1	5246	22.5	131	9.2
711	48417.8	4680	67.9	397	10.3
712	48456.7	3508	1.9	11	13.8
713	48477.9	3663	4.7	27	13.2
714	48499.2	3869	6.4	37	12.5
715	48544.3	3345	12.8	75	14.5
716	48618.4	3973	52.7	308	12.2
717	48649.6	2537	23.6	138	19.2
718	48669.8	3847	9	53	12.7
719	48688	3000	15.1	88	16.2
720	48703.6	4611	5.8	34	10.6
721	48873.5	3141	128.1	748	15.6
722	48903	9054	247.5	1445	5.4
723	48918.4	9169	217	1267	5.3
724	48934.4	9952	275.8	1610	4.9
725	48949.3	6837	18.5	108	7.2
726	48992.4	3746	4.8	28	13.1
727	49091	3554	15.1	88	13.8
728	49158.8	4052	107.8	629	12.1
729	49239.8	3361	35.9	210	14.7
730	49290.2	5607	7.7	45	8.8
731	49385.1	3137	8	47	15.7
732	49397	2865	5.8	34	17.2
733	49417.3	5068	2.3	14	9.8
734	49452.2	3529	207.1	1209	14
735	49543.1	2981	27.8	162	16.6
736	49609.9	3800	21.8	127	13.1
737	49729.9	2997	88.5	517	16.6
738	49760.4	2442	215.2	1256	20.4
739	49821.7	3655	41.9	245	13.6
740	49904.9	4104	2.2	13	12.2
741	49921.1	8857	5.1	30	5.6
742	49937.7	10709	6.2	36	4.7
743	49954.8	8425	6.6	39	5.9
744	49971.4	6165	61.3	358	8.1
745	49986.1	3815	56.8	331	13.1
746	50003	4396	26.4	154	11.4
747	50047	3706	298.6	1743	13.5
748	50056.2	2689	272.7	1592	18.6
749	50121.6	3791	49.5	289	13.2
750	50169.3	5146	4.5	27	9.8
751	50192.3	4905	18.4	107	10.2
752	50224.3	2903	1.8	11	17.3
753	50281.8	3540	93.9	548	14.2
754	50349	3873	76.1	444	13
755	50432.1	4021	4.9	28	12.5
756	50447	5425	7.7	45	9.3
757	50496.2	3918	11.9	70	12.9
758	50576.6	2876	6	35	17.6
759	50652.7	3833	373.5	2180	13.2
760	50725.2	3450	12.6	73	14.7
761	50818.5	3777	12.9	75	13.5
762	50869.4	2858	50.7	296	17.8
763	50882.2	4473	29.8	174	11.4
764	50940.4	6898	56	327	7.4
765	50957.8	5804	712.4	4159	8.8
766	50973	8078	901.4	5262	6.3
767	51033.4	5280	72	420	9.7
768	51056.4	4488	8.5	49	11.4
769	51109.5	2228	7.2	42	22.9
770	51172.3	3279	34.8	203	15.6
771	51261.6	3310	110	642	15.5
772	51429.8	3165	8	47	16.3
773	51484.6	4401	36.9	215	11.7
774	51497	2668	47.6	278	19.3
775	51552.6	2840	59.4	347	18.2
776	51584.5	4535	82.4	481	11.4
777	51647.2	5297	543.5	3173	9.8
778	51657	3701	729.6	4260	14
779	51697.9	3977	18.6	108	13
780	51713.5	6067	41.6	243	8.5
781	51732.6	2650	131.1	765	19.5
782	51872.7	3812	34.9	204	13.6
783	51959	9658	1.8	11	5.4
784	51976	10896	29.9	175	4.8
785	51992.6	9326	2.1	12	5.6
786	52314	2678	175.5	1024	19.5
787	52358.7	3791	683	3987	13.8
788	52370.6	4029	596.1	3480	13
789	52430.9	4143	376.9	2200	12.7
790	52442.5	3586	413.6	2415	14.6
791	52450.3	4686	464.6	2713	11.2
792	52530.3	3174	402.8	2351	16.5
793	52597.9	4624	36.5	213	11.4
794	52648.9	2857	64.5	376	18.4
795	52665.6	3456	49	286	15.2
796	52758.2	4166	85.5	499	12.7
797	53071.5	3304	422.1	2464	16.1
798	53158.3	4041	120.3	702	13.2
799	53248	3760	116.1	678	14.2
800	53268.7	5960	36.8	215	8.9
801	53279.3	3643	39.5	231	14.6
802	53312.5	4101	667.1	3895	13
803	53358	3130	159.3	930	17
804	53391	4744	592.8	3461	11.3
805	53541.7	3468	3	17	15.4
806	53550.9	4429	2.5	15	12.1
807	53633.8	3092	132.6	774	17.3
808	53735.2	2929	4.7	27	18.3
809	53811.1	2938	29.6	173	18.3
810	53859.4	3914	5.7	33	13.8
811	53892.5	3378	10.6	62	16
812	53963.1	4777	273.9	1599	11.3
813	54031.4	9106	162.9	951	5.9
814	54048.3	6472	11	64	8.4
815	54115.7	4635	3.6	21	11.7
816	54208.6	2367	3.4	20	22.9
817	54252	3671	638.5	3728	14.8
818	54269.1	3184	834.8	4873	17
819	54327.1	3224	124.9	729	16.8
820	54342.3	4069	146.1	853	13.4
821	54421.8	3255	5.7	33	16.7
822	54439.8	4399	3.3	19	12.4
823	54561.1	5007	88.1	514	10.9
824	54605.6	4938	229.2	1338	11.1
825	54670.8	4575	42.2	246	11.9
826	54729.5	3058	2.3	13	17.9
827	54799.1	3410	19.2	112	16.1
828	54832.4	6694	1.8	10	8.2
829	54880.8	3585	34.4	201	15.3
830	54916.6	3072	12.6	73	17.9
831	54982.1	4834	48.5	283	11.4
832	55033.7	10492	3.6	21	5.2
833	55051.5	10740	30	175	5.1
834	55069.3	8668	10.3	60	6.4
835	55086.8	5130	3.9	23	10.7
836	55149.5	3892	85	496	14.2
837	55171.7	3626	104.2	609	15.2
838	55202.8	3211	55.7	325	17.2
839	55229	3664	32.2	188	15.1
840	55278.5	6185	75	438	8.9
841	55309.2	2863	218.4	1275	19.3
842	55388.4	2890	40.6	237	19.2
843	55450.3	6250	41.6	243	8.9
844	55459	5671	28	163	9.8
845	55555.4	2541	31.2	182	21.9
846	55630.9	3604	25.5	149	15.4
847	55676.2	4895	3	17	11.4
848	55721.2	3117	2.9	17	17.9
849	55816.4	3802	4.5	26	14.7
850	55863.7	3217	17	99	17.4
851	55896.2	4091	34.9	204	13.7
852	55971.3	2998	2.9	17	18.7
853	56009	2636	1.9	11	21.2
854	56035	6825	3.9	23	8.2
855	56052.8	8694	81.6	476	6.4
856	56071.2	8526	43.6	255	6.6
857	56089.2	6160	36.4	212	9.1
858	56108.1	6097	90.4	528	9.2
859	56135.3	4935	53.3	311	11.4
860	56169.7	3175	321.9	1880	17.7
861	56289	3232	17.2	100	17.4
862	56400.8	4465	49.9	291	12.6
863	56459.7	3893	55.7	325	14.5
864	56473.1	2780	68.4	399	20.3
865	56502.7	4346	139.5	815	13
866	56512	5796	118.5	692	9.8
867	56652.4	3373	3.1	18	16.8
868	56715	6346	410.4	2396	8.9
869	56786.3	3562	9.2	54	15.9
870	56808.1	2902	19.1	111	19.6
871	56828.3	4969	28.7	168	11.4
872	56975.3	3776	73	426	15.1
873	57033.7	4091	135.7	792	13.9
874	57051.6	7893	62.4	364	7.2
875	57071.7	8861	77.6	453	6.4
876	57089.8	7890	17.1	100	7.2
877	57108.8	8896	12.5	73	6.4
878	57161.8	3827	31.1	182	14.9
879	57193.6	5174	2.2	13	11.1
880	57219	6250	7.1	42	9.2
881	57290.6	3917	26.6	155	14.6
882	57307.4	4408	22.7	132	13
883	57316.1	5039	19.7	115	11.4
884	57325.6	4953	18.8	110	11.6
885	57404.3	4666	2.4	14	12.3
886	57428.5	5049	3.8	22	11.4
887	57449.5	3113	4.8	28	18.5
888	57495.3	3724	21.2	124	15.4
889	57501.9	4546	21.5	126	12.6
890	57523.2	4720	8.3	48	12.2
891	57538.7	4229	9.5	56	13.6
892	57594.3	3245	15.2	89	17.8
893	57645.6	3559	5.8	34	16.2
894	57660	3449	6.6	39	16.7
895	57755.5	5924	74.2	433	9.8
896	57797.2	4077	2.3	13	14.2
897	57834.7	2920	54.7	320	19.8
898	57873.3	2858	11.4	67	20.3
899	57999.7	3463	16	93	16.7
900	58072.5	10422	94.8	553	5.6
901	58091.5	10535	1590.3	9285	5.5
902	58098.8	6501	674.5	3938	8.9
903	58109.7	10391	1851.6	10810	5.6
904	58128.7	7915	880	5138	7.3
905	58189.2	4213	83.3	486	13.8
906	58258.8	5122	8	47	11.4
907	58322	3103	7.2	42	18.8
908	58344.6	1995	8.1	47	29.3
909	58366	3991	10.7	62	14.6
910	58424.2	4230	14.2	83	13.8
911	58446.8	4231	22.3	130	13.8
912	58465.4	4497	32	187	13
913	58528.8	4315	41.1	240	13.6
914	58572.1	3604	7.8	45	16.3
915	58608.6	3273	5.1	30	17.9
916	58633	3086	6.8	40	19
917	58766.2	3367	18.1	106	17.5
918	58785.2	2961	19.5	114	19.9
919	58809.3	3747	14.1	82	15.7
920	58835.2	4257	7.4	43	13.8
921	58856.6	4829	43.9	256	12.2
922	58873.9	3134	62.7	366	18.8
923	58911.5	4265	4.7	27	13.8
924	58951.5	5249	6	35	11.2
925	58960.8	6645	5.1	30	8.9
926	58971.3	6598	2.2	13	8.9
927	58999.9	4034	6.8	39	14.6
928	59012.3	2793	8.1	48	21.1
929	59091.9	6431	8.4	49	9.2
930	59110.4	10381	63.3	370	5.7
931	59129.2	8318	20.4	119	7.1
932	59149.7	5635	64.5	377	10.5
933	59165.8	5507	73	426	10.7
934	59244.2	3231	42	245	18.3
935	59281.2	3178	7.3	43	18.7
936	59316.5	5014	14	82	11.8
937	59344.5	2934	35.6	208	20.2
938	59423	5224	11.2	65	11.4
939	59439.7	5627	6.5	38	10.6
940	59456.9	3308	6.5	38	18
941	59485.6	4576	11.7	68	13
942	59578	4827	31.4	183	12.3
943	59596.9	4557	13.1	77	13.1
944	59620.5	5422	17.6	103	11
945	59627.4	5196	16.3	95	11.5
946	59639.8	4588	11.7	68	13
947	59665.9	2971	17.6	103	20.1
948	59735.1	2722	396.3	2314	21.9
949	59831.2	5041	7.2	42	11.9
950	59841.5	5406	5.8	34	11.1
951	59947.1	3025	40.9	239	19.8
952	59972.6	4342	39.4	230	13.8
953	60005	3887	8.9	52	15.4
954	60069.7	4621	170.7	997	13
955	60129.7	11726	6.7	39	5.1
956	60148.6	9042	3.4	20	6.7
957	60195.6	4854	323.4	1888	12.4
958	60229.8	2574	21	123	23.4
959	60269	3260	4.4	25	18.5
960	60357.2	7429	186.9	1091	8.1
961	60400.9	4465	3.1	18	13.5
962	60427.2	74372	30.4	177	0.8
963	60447.4	3652	71.3	416	16.5
964	60539.9	3885	10.8	63	15.6
965	60637	3564	14.1	82	17
966	60657.4	5333	14.3	84	11.4
967	60698.3	4150	44.4	259	14.6
968	60722.6	5054	82.5	482	12
969	60731.4	4693	91.5	534	12.9
970	60740.5	5003	70	409	12.1
971	60750.6	5085	49.1	287	11.9
972	60800.5	3516	29	169	17.3
973	60831.8	4991	10.6	62	12.2
974	60836.8	6794	11.4	67	9
975	60877.3	2299	10	58	26.5
976	61047.7	2890	108.6	634	21.1
977	61056.8	5781	91.7	536	10.6
978	61085.1	3957	268.2	1566	15.4
979	61127.9	9112	24.3	142	6.7
980	61148.9	7819	94.3	550	7.8
981	61167.6	10636	415.5	2426	5.8
982	61188.6	7545	11.5	67	8.1
983	61277.1	75418	2.7	16	0.8
984	61345.9	3467	43.1	252	17.7
985	61426.5	5400	178.1	1040	11.4
986	61470.6	3147	7.6	44	19.5
987	61513.2	6309	30.1	176	9.8
988	61537.4	4740	234	1366	13
989	61612.1	6224	1.9	11	9.9
990	61688.6	6620	38.4	224	9.3
991	61696.7	4746	36.7	214	13
992	61731.7	3254	13.5	79	19
993	61783.4	3802	11	64	16.3
994	61795.4	4474	12.8	75	13.8
995	61823.5	2238	6.8	40	27.6
996	61868.6	3807	12.8	75	16.3
997	61894.3	5234	43.7	255	11.8
998	61906.7	4233	42.7	249	14.6
999	61935.3	3992	25.4	148	15.5
1000	61943.1	4235	28	163	14.6
1001	61987.5	4488	2.4	14	13.8
1002	62013.7	4591	11.6	67	13.5
1003	62037.9	5103	6.1	35	12.2
1004	62054	5455	3	18	11.4
1005	62148.2	7528	13.7	80	8.3
1006	62167.4	10842	201.5	1176	5.7
1007	62188.2	8552	296	1728	7.3
1008	62207.3	6619	250.2	1461	9.4
1009	62277.1	4030	51.8	303	15.5
1010	62359.7	5514	6.1	36	11.3
1011	62417.2	3492	2.8	16	17.9
1012	62433.3	4269	2.7	16	14.6
1013	62454	4046	5.8	34	15.4
1014	62481.7	5033	7.1	41	12.4
1015	62491.4	4719	5.6	33	13.2
1016	62500.6	5159	3.8	22	12.1
1017	62512	6994	2.2	13	8.9
1018	62550.1	5472	320.8	1873	11.4
1019	62644	3913	306.6	1790	16
1020	62699.5	3486	4.8	28	18
1021	62757.6	5304	8.4	49	11.8
1022	62781.7	5587	3.9	22	11.2
1023	62836.1	4760	11.6	67	13.2
1024	62859.2	3180	8.3	48	19.8
1025	62943.5	3479	99.4	580	18.1
1026	62982.4	4080	84.7	494	15.4
1027	63025.9	3049	1026.8	5994	20.7
1028	63098.9	3116	48.9	286	20.3
1029	63116	3296	62.8	366	19.1
1030	63299.1	4869	101.3	591	13
1031	63401.5	4590	288	1682	13.8
1032	63493.7	4113	122	712	15.4
1033	63520.3	3382	84.1	491	18.8
1034	63549.7	3129	12	70	20.3
1035	63577.7	4118	19.8	116	15.4
1036	63687.1	5244	57.8	337	12.1
1037	63695.9	4355	61.9	361	14.6
1038	63789.5	3594	11	64	17.7
1039	63908.8	4769	267.7	1563	13.4
1040	63916.3	7131	233.4	1363	9
1041	63929.9	4370	289.7	1691	14.6
1042	63969.5	3826	40.9	239	16.7
1043	63987.2	2820	71.6	418	22.7
1044	63992.1	7876	71.3	417	8.1
1045	64066.3	4711	373	2178	13.6
1046	64153.6	3725	44.8	261	17.2
1047	64184.3	9945	20.4	119	6.5
1048	64205.3	11945	16.5	96	5.4
1049	64226.9	9792	2.3	13	6.6
1050	64249.2	7670	20.6	120	8.4
1051	64269.1	3879	11.1	65	16.6
1052	64307.1	3264	2.6	15	19.7
1053	64360.4	3835	123.2	719	16.8
1054	64397.3	3263	3.2	19	19.7
1055	64437.3	2941	66.2	387	21.9
1056	64550.2	3728	18.5	108	17.3
1057	64586.1	5299	21.5	126	12.2
1058	64629	3615	86.9	508	17.9
1059	64674.1	4975	9.3	54	13
1060	64723.7	3755	162.9	951	17.2
1061	64733.4	4193	124.7	728	15.4
1062	64752.2	3716	95.3	556	17.4
1063	64833.4	7254	235	1372	8.9
1064	64841.8	4434	256.8	1499	14.6
1065	64930.7	2459	15.7	92	26.4
1066	64994.4	5041	2.3	14	12.9
1067	65089.7	4643	2.6	15	14
1068	65205.4	4691	5.6	32	13.9
1069	65223.8	8522	8.7	51	7.7
1070	65245.4	9158	2.9	17	7.1
1071	65321.6	5025	1.8	10	13
1072	65390.9	4734	155.8	909	13.8
1073	65398.4	7199	139.6	815	9.1
1074	65465.5	8057	650	3795	8.1
1075	65525.2	2913	167	975	22.5
1076	65544.8	5378	193.5	1130	12.2
1077	65553.3	5763	211.1	1232	11.4
1078	65562	4269	220.8	1289	15.4
1079	65589.6	3601	42.3	247	18.2
1080	65669	5014	92.5	540	13.1
1081	65733.1	4495	76.6	447	14.6
1082	65752.2	4306	45.7	267	15.3
1083	65800.6	7362	7.7	45	8.9
1084	65840.6	3621	2.4	14	18.2
1085	65865.8	3487	1.8	11	18.9
1086	65952.8	4392	210.5	1229	15
1087	66024.1	5809	2.1	12	11.4
1088	66032.3	4821	1.9	11	13.7
1089	66050.5	3568	2.5	15	18.5
1090	66168.6	4292	25.5	149	15.4
1091	66213	4660	65.7	384	14.2
1092	66220.4	6927	81.8	478	9.6
1093	66243.8	10651	14.4	84	6.2
1094	66265.5	9853	5.9	34	6.7
1095	66333.8	8164	671	3917	8.1
1096	66413.8	6812	10.6	62	9.8
1097	66427.3	4088	12.4	72	16.3
1098	66539.4	4079	4	23	16.3
1099	66642.8	4664	198	1156	14.3
1100	66650.7	82032	184.2	1076	0.8
1101	66671.6	2943	227	1325	22.7
1102	66751.7	82156	236.3	1379	0.8
1103	66826.7	5430	74.3	434	12.3
1104	66895.1	7666	8.4	49	8.7
1105	66904.4	4850	10.2	60	13.8
1106	66922.7	5389	21.8	127	12.4
1107	67009.3	7498	18.3	107	8.9
1108	67045	82517	414.6	2420	0.8
1109	67112.7	4859	19	111	13.8
1110	67123.6	4860	25.9	151	13.8
1111	67176.7	5512	2.1	12	12.2
1112	67202.7	6893	6.1	36	9.8
1113	67242	8732	2.6	15	7.7
1114	67263	12004	40.9	239	5.6
1115	67285.3	10650	5.5	32	6.3
1116	67307.8	7273	8.1	47	9.3
1117	67328	6069	12.7	74	11.1
1118	67353.1	5921	1.9	11	11.4
1119	67360.2	5922	1.8	10	11.4
1120	67407.1	4308	130	759	15.6
1121	67456.7	83024	196.4	1147	0.8
1122	67542.4	3704	124	724	18.2
1123	67577.3	5243	3.2	19	12.9
1124	67608.2	5076	3.7	21	13.3
1125	67618.6	4316	3.2	18	15.7
1126	67634.6	4381	2.7	16	15.4
1127	67660.2	3080	5.2	30	22
1128	67761.4	6111	52.1	304	11.1
1129	67783.1	5460	13.6	79	12.4
1130	67794.7	4908	10.3	60	13.8
1131	67806	5353	14.2	83	12.7
1132	67840.1	4660	290.4	1695	14.6
1133	67908.9	4179	17.3	101	16.3
1134	67930.8	3573	32.4	189	19
1135	68029	6044	1.8	10	11.3
1136	68050.2	4235	8.3	49	16.1
1137	68070.1	3489	5.4	31	19.5
1138	68132.7	3137	17.5	102	21.7
1139	68163.2	5731	16.5	96	11.9
1140	68259.8	6985	2149.4	12549	9.8
1141	68280.8	7669	795.3	4643	8.9
1142	68304.2	7554	70.5	412	9
1143	68329.5	7785	141	823	8.8
1144	68346.6	5101	281	1640	13.4
1145	68400.3	4677	10.9	63	14.6
1146	68445	5052	2.1	12	13.5
1147	68469.1	4213	3.8	22	16.3
1148	68533.8	5272	15.3	89	13
1149	68542.4	4218	17.8	104	16.3
1150	68561.3	3456	19	111	19.8
1151	68642.7	5493	16.4	96	12.5
1152	68663.5	4494	31	181	15.3
1153	68722.7	6042	79.5	464	11.4
1154	68814.2	4974	5.8	34	13.8
1155	68857.3	2568	2.2	13	26.8
1156	68889.6	4949	4.6	27	13.9
1157	68934.4	4150	12.6	73	16.6
1158	68947.3	3857	11.6	68	17.9
1159	68973.7	6530	18.1	106	10.6
1160	69007.2	3901	30.8	180	17.7
1161	69043.9	3245	44.9	262	21.3
1162	69091.7	2227	7.4	43	31
1163	69110.4	5003	4.9	29	13.8
1164	69140.1	5022	32.5	190	13.8
1165	69166.8	3783	14	82	18.3
1166	69200.3	3894	9.3	54	17.8
1167	69209.7	6084	9	53	11.4
1168	69219.8	5299	12.3	72	13.1
1169	69280.3	8312	24.9	145	8.3
1170	69301.6	7436	604	3526	9.3
1171	69322.8	7535	324.6	1895	9.2
1172	69346.1	7864	5.1	30	8.8
1173	69372	6292	15.8	92	11
1174	69399.2	5844	214.1	1250	11.9
1175	69407.9	5652	163.3	953	12.3
1176	69449.2	3302	44.8	261	21
1177	69483	6578	22.9	134	10.6
1178	69494.9	4377	26.5	155	15.9
1179	69520.9	5266	8	47	13.2
1180	69532.8	6612	7.5	44	10.5
1181	69543.9	7133	3.3	19	9.8
1182	69559.5	8882	15.2	89	7.8
1183	69567.5	4447	21.6	126	15.6
1184	69578.2	4628	20.1	117	15
1185	69601.6	3731	15.4	90	18.7
1186	69644.8	5042	2.6	15	13.8
1187	69704.4	5362	27	158	13
1188	69716.3	2810	28.1	164	24.8
1189	69755.1	7805	73.7	431	8.9
1190	69794.6	3770	51.2	299	18.5
1191	69803	4042	59.3	346	17.3
1192	69816.2	7161	43.6	254	9.8
1193	69826	4523	49.6	290	15.4
1194	69835.1	4743	45.7	267	14.7
1195	69871.2	4812	4.9	29	14.5
1196	69922.1	86058	6.3	37	0.8
1197	69924.7	86061	6.4	37	0.8
1198	69934.2	5172	8.1	48	13.5
1199	69964.8	7637	43.3	253	9.2
1200	69992.4	8614	6.1	36	8.1
1201	70029.1	6156	37.4	218	11.4
1202	70130.5	4110	8.6	50	17.1
1203	70138.5	4255	8.3	49	16.5
1204	70221.2	4549	220.5	1287	15.4
1205	70246.7	6176	41.7	243	11.4
1206	70297.5	10879	67.2	392	6.5
1207	70320.6	11057	109.7	641	6.4
1208	70343.6	10663	283.1	1653	6.6
1209	70364.3	8377	21.5	126	8.4
1210	70435.6	5260	5.6	33	13.4
1211	70446.6	5243	3.5	21	13.4
1212	70458.2	4644	1.8	11	15.2
1213	70532	5426	41.1	240	13
1214	70546.1	3216	52	303	21.9
1215	70572.8	5109	55.6	325	13.8
1216	70611.8	4828	21.7	127	14.6
1217	70651.2	4831	12.8	75	14.6
1218	70667.1	4832	13	76	14.6
1219	70680.5	3534	13.4	78	20
1220	70752.4	3790	65.4	382	18.7
1221	70853.9	4280	19.4	113	16.6
1222	70875.7	5527	80.6	470	12.8
1223	70968.2	4063	21.1	123	17.5
1224	70985.7	5460	24.6	144	13
1225	71002	4345	28.5	166	16.3
1226	71040.3	3238	30.6	179	21.9
1227	71083	5459	209.9	1225	13
1228	71103.3	4693	32.1	188	15.2
1229	71131.7	4864	9.3	54	14.6
1230	71183.4	3269	57	333	21.8
1231	71217.2	4485	47.3	276	15.9
1232	71281.7	4196	38.2	223	17
1233	71292.6	4496	27.2	159	15.9
1234	71307.1	7978	20.2	118	8.9
1235	71316.5	10602	68.5	400	6.7
1236	71327.2	7316	25.5	149	9.8
1237	71339.1	9481	61.4	358	7.5
1238	71363	9619	35.3	206	7.4
1239	71386.8	7385	51.4	300	9.7
1240	71397.8	6277	24.3	142	11.4
1241	71409.3	5170	25.5	149	13.8
1242	71429.3	3256	12.1	71	21.9
1243	71445.5	5496	9.4	55	13
1244	71493.5	4900	203	1185	14.6
1245	71554.2	4222	20.6	120	16.9
1246	71583.5	5183	19	111	13.8
1247	71601.6	6295	9.3	55	11.4
1248	71655.6	3609	67.8	396	19.9
1249	71721.6	4125	3	17	17.4
1250	71812.1	4168	8.5	50	17.2
1251	71823.6	4362	8.8	51	16.5
1252	71849	5153	3.2	19	13.9
1253	71906.7	4917	13.1	77	14.6
1254	71927.4	8853	18	105	8.1
1255	71950.9	7380	10.1	59	9.8
1256	71987.1	5907	59	344	12.2
1257	72023.5	4036	190.2	1111	17.8
1258	72065.4	5543	4.9	28	13
1259	72234.5	9878	22.2	129	7.3
1260	72289.5	3994	2.7	16	18.1
1261	72335.4	7106	1514.9	8844	10.2
1262	72349.3	5565	910.7	5317	13
1263	72358.6	7170	1487.5	8685	10.1
1264	72381.9	8762	784.6	4581	8.3
1265	72406	7275	495.4	2892	10
1266	72428.5	5800	253.5	1480	12.5
1267	72516.6	3306	3.4	20	21.9
1268	72590.9	5225	61.3	358	13.9
1269	72612.8	4704	40.3	235	15.4
1270	72657.5	4968	121.9	711	14.6
1271	72704.6	4971	13.6	80	14.6
1272	72736.2	4712	27.1	158	15.4
1273	72741.4	8139	26.3	153	8.9
1274	72752.3	4975	27.5	161	14.6
1275	72807.9	4978	62.3	363	14.6
1276	72817.8	5349	52.9	309	13.6
1277	72929.7	3997	43	251	18.2
1278	72944.6	8978	20.9	122	8.1
1279	72964.5	5282	41	239	13.8
1280	73007.3	5008	36.6	214	14.6
1281	73018.3	5286	31.5	184	13.8
1282	73030.9	4731	29.4	172	15.4
1283	73041.8	5013	29.7	173	14.6
1284	73052.7	6513	19.3	113	11.2
1285	73064.2	4655	9.4	55	15.7
1286	73082.5	4990	5.9	34	14.6
1287	73146	4572	5	29	16
1288	73225.8	4753	8.9	52	15.4
1289	73235.6	5634	7.6	44	13
1290	73254.4	5303	5.5	32	13.8
1291	73309.9	4740	229.5	1340	15.5
1292	73323	7520	275.5	1608	9.8
1293	73334.9	5309	287.5	1678	13.8
1294	73353.3	9414	442.8	2585	7.8
1295	73377.7	10766	119.6	698	6.8
1296	73401.8	10496	237.8	1389	7
1297	73426	9243	339.1	1980	7.9
1298	73450.2	5391	216.3	1263	13.6
1299	73545.9	3302	9.5	55	22.3
1300	73649.7	5380	14	82	13.7
1301	73709.4	8247	50.5	295	8.9
1302	73765.5	4778	69.7	407	15.4
1303	73874.2	6120	92.8	542	12.1
1304	73906.8	7774	6.9	40	9.5
1305	73922.2	5858	3.5	20	12.6
1306	73935	5585	5.1	30	13.2
1307	73945.7	5056	4.3	25	14.6
1308	73958	5284	4.1	24	14
1309	73970.6	6288	5.5	32	11.8
1310	74101	4560	46	269	16.3
1311	74144.7	5573	116.4	680	13.3
1312	74170.1	4142	415.5	2426	17.9
1313	74239.2	3135	24.4	143	23.7
1314	74298.5	4320	111	648	17.2
1315	74371.6	7727	6.8	40	9.6
1316	74397.3	10652	11.5	67	7
1317	74421.6	9489	34.7	203	7.8
1318	74445.2	7135	15	88	10.4
1319	74469.7	3860	3.9	23	19.3
1320	74499.6	8336	5.9	34	8.9
1321	74527.9	5414	25.9	151	13.8
1322	74596.3	4173	58.9	344	17.9
1323	74629	2702	53.2	311	27.6
1324	74671.9	3677	5.6	33	20.3
1325	74704	5492	6.3	37	13.6
1326	74734.4	4538	219.9	1284	16.5
1327	74788.7	5415	6.4	37	13.8
1328	74801.4	4928	7.2	42	15.2
1329	74814	4858	7.7	45	15.4
1330	74827.5	5116	7.6	45	14.6
1331	74840	3942	10.2	59	19
1332	74908.1	6815	150	876	11
1333	74917.8	5123	154.2	900	14.6
1334	74981	4573	7.3	43	16.4
1335	75068	4863	211.2	1233	15.4
1336	75181.2	5783	147.2	859	13
1337	75187.4	7084	137.2	801	10.6
1338	75243.6	5853	20.8	121	12.9
1339	75281	4877	13.6	80	15.4
1340	75378.2	6627	2.9	17	11.4
1341	75391.9	8297	11	64	9.1
1342	75416	10537	14.6	85	7.2
1343	75441.2	10003	9.9	58	7.5
1344	75465.2	9388	8	47	8
1345	75529.5	7747	325.3	1899	9.8
1346	75625.9	4080	77.8	454	18.5
1347	75644.1	6009	58.8	343	12.6
1348	75669.7	5247	17.2	100	14.4
1349	75680.6	6311	10.4	61	12
1350	75695.8	5582	10	58	13.6
1351	75708.2	6124	12.1	71	12.4
1352	75719.6	5154	21.6	126	14.7
1353	75742.4	4510	8.2	48	16.8
1354	75772.9	3029	14.8	86	25
1355	75792.5	5182	9.3	54	14.6
1356	75869.1	3879	286.5	1673	19.6
1357	75934.2	3461	79.8	466	21.9
1358	75975.8	4922	152.5	890	15.4
1359	75986.4	5672	111.9	653	13.4
1360	76046.8	5317	47.4	276	14.3
1361	76080.9	3387	33.4	195	22.5
1362	76222.6	5518	55.1	322	13.8
1363	76261.9	4381	19.4	113	17.4
1364	76273.1	7823	14.4	84	9.8
1365	76291.4	5426	12.2	71	14.1
1366	76360.5	3592	27.4	160	21.3
1367	76410	10697	115.8	676	7.1
1368	76435.6	11305	194.1	1133	6.8
1369	76448.3	9409	51.7	302	8.1
1370	76460.5	10552	198.2	1157	7.2
1371	76485.2	8279	100.7	588	9.2
1372	76509.7	4953	31.8	186	15.4
1373	76548.5	5974	47.2	276	12.8
1374	76573.9	4813	15	88	15.9
1375	76671.4	5115	69.8	408	15
1376	76717	4105	2	12	18.7
1377	76756	3465	20.7	121	22.2
1378	76794.7	4975	8.2	48	15.4
1379	76900.2	5007	180.1	1052	15.4
1380	76910	4982	165.7	968	15.4
1381	76960.4	7893	1.8	11	9.8
1382	76998.3	5923	70.8	413	13
1383	77090.5	6641	97.3	568	11.6
1384	77100.9	5638	117	683	13.7
1385	77109.1	5561	112.2	655	13.9
1386	77118.2	9350	72.1	421	8.2
1387	77153.9	5586	4.3	25	13.8
1388	77172.9	4709	7.9	46	16.4
1389	77226.3	3915	51.2	299	19.7
1390	77250	4375	68.2	398	17.7
1391	77336.1	9518	151.2	883	8.1
1392	77430.2	9136	19	111	8.5
1393	77455	11231	105.2	614	6.9
1394	77467.7	7945	44.8	261	9.8
1395	77480	9711	147.8	863	8
1396	77492.2	5299	67.1	392	14.6
1397	77504.5	6544	93.3	545	11.8
1398	77527.7	4145	11.3	66	18.7
1399	77569.7	5657	36.9	216	13.7
1400	77599	3673	23.7	139	21.1
1401	77630.9	6825	6.9	40	11.4
1402	77660.4	3854	28.4	166	20.2
1403	77788.3	4352	549.9	3210	17.9
1404	77849.2	5323	35.7	208	14.6
1405	77862.4	5989	34.8	203	13
1406	77869.8	6846	37.5	219	11.4
1407	77881.8	3887	52.3	305	20
1408	77923.4	5328	75.2	439	14.6
1409	77937.6	4305	92.7	541	18.1
1410	78018.1	6401	5.8	34	12.2
1411	78041.9	5214	21.6	126	15
1412	78065.6	5097	8.6	50	15.3
1413	78083.4	5058	7.3	43	15.4
1414	78096.8	4806	11	64	16.3
1415	78184.2	5002	2.1	12	15.6
1416	78249.7	4378	14.2	83	17.9
1417	78351	6775	2.5	14	11.6
1418	78385.9	5410	12.8	75	14.5
1419	78433.3	4827	22.1	129	16.3
1420	78447.5	8243	36.6	214	9.5
1421	78473.8	9613	134	782	8.2
1422	78499.9	8400	188.1	1098	9.3
1423	78512.5	5684	106.5	622	13.8
1424	78524.8	7934	210.6	1230	9.9
1425	78549.5	4429	50.9	297	17.7
1426	78578.6	3748	41.9	245	21
1427	78643.4	5267	131.7	769	14.9
1428	78677.4	4160	58.8	343	18.9
1429	78701.5	5698	41.4	242	13.8
1430	78725	6468	20.9	122	12.2
1431	78802.8	5105	151.9	887	15.4
1432	78881.5	9708	219.3	1280	8.1
1433	78975	4050	256.4	1497	19.5
1434	79131.8	8854	402.9	2352	8.9
1435	79190.2	5733	2.2	13	13.8
1436	79215.5	5320	6.9	40	14.9
1437	79228.6	4579	11.3	66	17.3
1438	79256.5	4786	28	163	16.6
1439	79281	3244	21.6	126	24.4
1440	79348.8	5426	25.8	151	14.6
1441	79356.9	6976	27.4	160	11.4
1442	79365.9	5427	25.6	150	14.6
1443	79398.1	4339	35	204	18.3
1444	79438.5	3550	25.6	149	22.4
1445	79466.7	9238	31.7	185	8.6
1446	79492.6	12048	54.4	318	6.6
1447	79518.5	10507	23.3	136	7.6
1448	79545.9	5996	21.5	126	13.3
1449	79573.9	6033	65.4	382	13.2
1450	79618.9	8908	418.6	2444	8.9
1451	79737.3	4284	38.2	223	18.6
1452	79910.1	8196	29.6	173	9.8
1453	79986	5469	246.4	1439	14.6
1454	80001.5	5182	266.4	1555	15.4
1455	80082.7	6098	502.7	2935	13.1
1456	80094.1	6052	452.4	2641	13.2
1457	80105.4	7258	223.3	1304	11
1458	80186.1	4700	37.2	217	17.1
1459	80231.2	6184	13.2	77	13
1460	80258.1	3857	8.6	50	20.8
1461	80265.8	5199	8.1	47	15.4
1462	80283.8	4491	6.6	38	17.9
1463	80302.1	3857	9.7	56	20.8
1464	80312.9	3296	10	59	24.4
1465	80335.2	3472	12.4	72	23.1
1466	80362.8	6182	5	29	13
1467	80445.6	7616	303.1	1770	10.6
1468	80484.6	6665	246.1	1437	12.1
1469	80511	7188	50.5	295	11.2
1470	80538.6	10501	79.5	464	7.7
1471	80564.9	6775	87.1	509	11.9
1472	80590	4789	47	274	16.8
1473	80711.1	6209	105.5	616	13
1474	80777.8	5523	4.8	28	14.6
1475	80792	5019	4.9	28	16.1
1476	80844.5	5528	45.1	264	14.6
1477	80938.2	5271	238.6	1393	15.4
1478	80946.4	3325	252.5	1474	24.3
1479	80974.4	6266	128.9	752	12.9
1480	81027.5	4974	51.1	298	16.3
1481	81045.3	5346	58.5	341	15.2
1482	81094.2	4605	12.1	71	17.6
1483	81162.4	5257	59.2	346	15.4
1484	81304.7	4635	17.3	101	17.5
1485	81326.9	10009	8.7	51	8.1
1486	81365.1	4552	88	514	17.9
1487	81439.3	5177	605.4	3535	15.7
1488	81478.4	5899	41.2	241	13.8
1489	81505	6602	222.2	1297	12.3
1490	81529.7	6642	116	677	12.3
1491	81556.2	9078	21.9	128	9
1492	81584.8	9149	5.4	31	8.9
1493	81612.7	3477	2.6	15	23.5
1494	81632.5	2451	2.7	16	33.3
1495	81660.5	5584	2.6	15	14.6
1496	81677.7	5913	2.6	15	13.8
1497	81697	5586	3.5	20	14.6
1498	81758.6	4500	4.5	26	18.2
1499	81805.1	6695	93.8	548	12.2
1500	81841.1	5273	45.3	264	15.5
1501	81855.8	5478	49.3	288	14.9
1502	81893.7	5283	318.2	1858	15.5
1503	81909.7	8401	442.6	2584	9.8
1504	81921.3	4305	495.6	2893	19
1505	81959.3	3362	25.3	147	24.4
1506	81973.9	5935	25.1	147	13.8
1507	82007.2	4312	75.2	439	19
1508	82044.6	2625	38.1	222	31.3
1509	82080	5317	19.6	114	15.4
1510	82162.6	3950	31.5	184	20.8
1511	82176.2	7780	23.6	138	10.6
1512	82187.4	4193	28.3	165	19.6
1513	82305.3	5009	369.9	2159	16.4
1514	82382.1	7969	563.2	3288	10.3
1515	82461.1	8458	20.9	122	9.8
1516	82496.5	5641	4.4	25	14.6
1517	82509	10155	3.6	21	8.1
1518	82523.5	9821	15.4	90	8.4
1519	82550	12134	89.6	523	6.8
1520	82576.5	10991	28.3	165	7.5
1521	82605.3	7766	4.4	25	10.6
1522	82634.4	5448	31.3	183	15.2
1523	82649.4	3468	56.3	329	23.8
1524	82722.7	7016	10.1	59	11.8
1525	82737.3	5428	10.7	62	15.2
1526	82765.2	5792	55.5	324	14.3
1527	82805.5	4246	14.7	86	19.5
1528	82845.4	2921	8.8	51	28.4
1529	82861.6	5999	7.9	46	13.8
1530	82915.1	7289	180.2	1052	11.4
1531	82923.2	5372	181.1	1057	15.4
1532	82956.4	5402	54	315	15.4
1533	83035.2	4355	14.1	82	19.1
1534	83088.2	5113	6.3	37	16.3
1535	83096.7	6392	7.1	41	13
1536	83121.6	6307	24.6	144	13.2
1537	83129	5385	25.7	150	15.4
1538	83140.6	7309	23	134	11.4
1539	83172.3	5118	50	292	16.3
1540	83201.4	5681	31.4	183	14.6
1541	83287.9	4467	13.7	80	18.6
1542	83304.2	6031	8.1	47	13.8
1543	83314.1	4773	9.1	53	17.5
1544	83343.4	6260	23.5	137	13.3
1545	83396.1	4121	16.3	95	20.2
1546	83429.6	6418	6.7	39	13
1547	83445.1	3192	8.6	50	26.1
1548	83481	6044	4.8	28	13.8
1549	83525.1	8567	104.1	608	9.8
1550	83541.9	5068	191.7	1119	16.5
1551	83568.7	9265	69	403	9
1552	83598.6	5968	75.5	441	14
1553	83625.7	5199	346.7	2024	16.1
1554	83651.4	6478	349.9	2043	12.9
1555	83699	9365	22.6	132	8.9
1556	83708.3	5151	25.9	151	16.3
1557	83763.6	6443	809.1	4724	13
1558	83779.8	3683	915.5	5345	22.8
1559	83793.5	5428	1138.7	6648	15.4
1560	83800.3	4728	1058.5	6180	17.7
1561	83813.8	5731	1045.9	6106	14.6
1562	83890.9	7942	82.4	481	10.6
1563	83922.6	11477	225.6	1317	7.3
1564	83941.8	7380	171.6	1002	11.4
1565	84050.6	5747	37.8	221	14.6
1566	84275	4322	2.8	16	19.5
1567	84422.7	8659	29.6	173	9.8
1568	84525.5	6230	4.8	28	13.6
1569	84561.5	5331	68.5	400	15.9
1570	84589.2	10081	311.6	1819	8.4
1571	84616.4	5255	726.9	4244	16.1
1572	84644.3	5380	1142.8	6672	15.7
1573	84656	5788	643.8	3758	14.6
1574	84694.2	3902	5187.4	30285	21.7
1575	84727.7	4966	1166.4	6810	17.1
1576	84742.2	3863	1110.6	6484	21.9
1577	84778.8	6521	596	3480	13
1578	84784.9	5484	578.8	3379	15.5
1579	84797.3	6139	365.6	2135	13.8
1580	84810.2	6414	287.4	1678	13.2
1581	84893.4	4151	159	928	20.5
1582	84928	5501	65.9	385	15.4
1583	84973.6	10458	4.4	26	8.1
1584	85056.5	6812	231	1348	12.5
1585	85208.7	5111	5.6	32	16.7
1586	85243	6599	3.5	20	12.9
1587	85436	8763	93	543	9.8
1588	85444.7	4780	94.6	552	17.9
1589	85463.9	6912	83.2	486	12.4
1590	85474.2	4782	87.3	510	17.9
1591	85545.6	6421	881	5144	13.3
1592	85560.8	4050	1120.2	6540	21.1
1593	85578.9	7200	1749.1	10211	11.9
1594	85607	10081	802.9	4687	8.5
1595	85635.1	10089	210.3	1228	8.5
1596	85664	9256	129.8	758	9.3
1597	85677.6	6591	38.7	226	13
1598	85692.7	5316	57.9	338	16.1
1599	85721.3	5275	155.6	908	16.3
1600	85826.6	6768	107.8	629	12.7
1601	85902.6	7048	135.1	789	12.2
1602	85977.1	3315	19.9	116	25.9
1603	85994.3	3207	14.5	85	26.8
1604	86032.5	6229	8.3	49	13.8
1605	86110.7	5043	11.7	68	17.1
1606	86115.3	3885	11.6	68	22.2
1607	86152.3	4418	9.7	57	19.5
1608	86175.3	4580	20	117	18.8
1609	86228.9	6878	110.5	645	12.5
1610	86242.5	4198	171.7	1002	20.5
1611	86256.7	5892	205	1197	14.6
1612	86270.1	4528	202.7	1184	19.1
1613	86283.3	7145	130.6	762	12.1
1614	86297.3	5901	51	298	14.6
1615	86310.2	4829	40.3	235	17.9
1616	86342.7	4991	29.2	170	17.3
1617	86399.9	5317	146.8	857	16.3
1618	86413	6647	121.5	709	13
1619	86425.5	4766	107.8	629	18.1
1620	86453.4	9673	45.7	267	8.9
1621	86535.3	4324	14.7	86	20
1622	86597.9	6792	47.7	279	12.7
1623	86626.2	9677	176.2	1029	9
1624	86655.3	9730	111.4	651	8.9
1625	86683.5	6106	20.3	119	14.2
1626	86695.7	5000	19.3	113	17.3
1627	86710.2	6123	17.4	102	14.2
1628	86754.6	8898	17.9	105	9.8
1629	86800.8	4273	20.7	121	20.3
1630	86854.2	7636	3.4	20	11.4
1631	86870.7	5627	3.6	21	15.4
1632	86917.8	9725	2.6	15	8.9
1633	86959.5	5465	15.1	88	15.9
1634	86970.2	7139	16.3	95	12.2
1635	86984.9	8922	18.2	106	9.8
1636	87012.2	5636	16	94	15.4
1637	87024.8	5355	16.6	97	16.3
1638	87037.3	6695	14.9	87	13
1639	87049.7	7076	15.3	89	12.3
1640	87069.1	7654	10.3	60	11.4
1641	87083.3	5641	9.5	55	15.4
1642	87109.7	5262	13	76	16.6
1643	87138.7	8653	341.3	1992	10.1
1644	87150.9	4363	498.8	2912	20
1645	87166.2	5808	595.6	3477	15
1646	87180.4	5109	813.8	4751	17.1
1647	87245.1	5037	99.2	579	17.3
1648	87278.6	9765	157	917	8.9
1649	87389.6	5975	50.7	296	14.6
1650	87418	6266	24.6	144	14
1651	87457.4	3796	9	53	23
1652	87472.4	8972	7.8	46	9.8
1653	87517.1	9792	17.6	103	8.9
1654	87560.7	7698	29.8	174	11.4
1655	87580.6	4900	17.9	105	17.9
1656	87596.8	6568	13	76	13.3
1657	87617.7	8233	42.6	249	10.6
1658	87645.7	9249	52.1	304	9.5
1659	87674.9	9154	108.9	636	9.6
1660	87703.6	5898	199.1	1163	14.9
1661	87792.2	9004	30.8	180	9.8
1662	87913.1	5379	59.2	346	16.3
1663	87959.2	6766	47.3	276	13
1664	87987.9	4332	41.4	242	20.3
1665	88001.3	4838	35.3	206	18.2
1666	88016.4	4754	21.3	125	18.5
1667	88082.3	2898	13.8	80	30.4
1668	88104.3	6379	9.6	56	13.8
1669	88176.5	4933	112	654	17.9
1670	88213.6	5906	109.2	637	14.9
1671	88248.1	4937	19.9	116	17.9
1672	88284.7	5433	82.1	479	16.3
1673	88307	10869	35.3	206	8.1
1674	88326.3	7247	30.5	178	12.2
1675	88338.8	4699	42.5	248	18.8
1676	88391.7	8368	6.6	38	10.6
1677	88425.9	4220	45.4	265	21
1678	88444	3365	40	234	26.3
1679	88532.6	4714	41.9	245	18.8
1680	88635.9	10217	57.1	333	8.7
1681	88664.7	12908	47.6	278	6.9
1682	88695.9	7828	99.9	583	11.3
1683	88723	8653	563.1	3287	10.3
1684	88750	6385	182.7	1066	13.9
1685	88787.1	6071	15.4	90	14.6
1686	88810.2	5465	40.7	238	16.3
1687	88844.5	9941	138	805	8.9
1688	88880.7	6797	44.3	259	13.1
1689	88896.4	7303	20.7	121	12.2
1690	88913.2	5472	16.4	96	16.3
1691	89007.8	5389	384.4	2244	16.5
1692	89071.4	6852	3.7	22	13
1693	89083.1	4984	5.1	30	17.9
1694	89158.9	4529	26.2	153	19.7
1695	89170.6	6456	30	175	13.8
1696	89191.6	4990	54.9	320	17.9
1697	89217.7	6863	40	233	13
1698	89227.8	5491	43.4	254	16.3
1699	89262.9	10986	12.4	72	8.1
1700	89291.9	3418	40.2	235	26.1
1701	89396.8	9169	392.9	2294	9.8
1702	89443.6	7339	31.3	183	12.2
1703	89471.9	5005	57.4	335	17.9
1704	89486.9	9178	77.5	452	9.8
1705	89519.4	9181	19.3	113	9.8
1706	89541.9	5510	33.9	198	16.3
1707	89605	4925	71.6	418	18.2
1708	89655.9	7671	45.2	264	11.7
1709	89683.5	8327	161.5	943	10.8
1710	89712.7	7771	16.5	96	11.5
1711	89742.4	6243	17.5	102	14.4
1712	89773.2	7270	35.8	209	12.3
1713	89801.6	10048	8.5	50	8.9
1714	89842.7	6143	5.3	31	14.6
1715	89875.7	4796	25.4	148	18.7
1716	89917.5	11067	16.8	98	8.1
1717	89923.7	7905	17.6	103	11.4
1718	89936.4	8515	13	76	10.6
1719	89974	5537	5.8	34	16.3
1720	90069.3	5834	30.6	179	15.4
1721	90103.9	5545	14.3	84	16.3
1722	90161.1	4002	2.5	15	22.5
1723	90195.8	6856	14.9	87	13.2
1724	90223.6	9254	18.8	110	9.8
1725	90284	5453	356.9	2084	16.6
1726	90316.7	9263	32.2	188	9.8
1727	90356.6	7366	78.8	460	12.3
1728	90367.4	6951	81.3	474	13
1729	90407.9	6226	865	5050	14.5
1730	90424.6	3710	875.4	5111	24.4
1731	90438.9	6675	837.8	4891	13.5
1732	90495.2	5304	83.1	485	17.1
1733	90508.9	5063	87.8	513	17.9
1734	90530.2	3997	158.5	925	22.6
1735	90599.2	4783	9.4	55	18.9
1736	90618.4	5135	12	70	17.6
1737	90629	5202	17	99	17.4
1738	90642.1	4462	19.2	112	20.3
1739	90657.8	5735	21.4	125	15.8
1740	90672.8	10961	95.5	557	8.3
1741	90702.9	10710	21.3	124	8.5
1742	90734.1	8988	71.8	419	10.1
1743	90761.8	6247	32.8	191	14.5
1744	90793	4546	35.2	205	20
1745	90818.3	6986	33.7	197	13
1746	90833.1	5082	42.1	246	17.9
1747	90843.7	6988	43.4	253	13
1748	90851.9	111818	41.1	240	0.8
1749	90879.9	6580	34.1	199	13.8
1750	90927.9	6583	52.7	308	13.8
1751	90957.3	5075	40.4	236	17.9
1752	90999.9	5091	53.2	311	17.9
1753	91046.6	5992	22.1	129	15.2
1754	91076.9	4484	5.2	30	20.3
1755	91128.8	3728	24.5	143	24.4
1756	91202.7	5612	15	87	16.3
1757	91259.1	4680	3.2	19	19.5
1758	91269.4	5912	2.7	16	15.4
1759	91306.3	6610	5.4	31	13.8
1760	91322	4887	5.8	34	18.7
1761	91332.3	7309	5.6	33	12.5
1762	91353.5	4497	4.8	28	20.3
1763	91372.2	8033	4.3	25	11.4
1764	91392.5	5737	3.3	19	15.9
1765	91432.1	6107	49.3	288	15
1766	91450.5	5628	33.7	197	16.3
1767	91468.2	4036	36.2	211	22.7
1768	91522.6	5373	97.3	568	17
1769	91538.1	5633	104.9	612	16.3
1770	91552.3	5056	179.5	1048	18.1
1771	91564	7780	126	736	11.8
1772	91615.2	8054	159.8	933	11.4
1773	91630.4	9398	230.7	1347	9.8
1774	91643.3	12532	287.4	1678	7.3
1775	91651.3	8057	308.1	1798	11.4
1776	91690.5	8213	37.9	222	11.2
1777	91723.1	8935	52.1	304	10.3
1778	91751.8	9191	121.2	707	10
1779	91782.1	7269	53	309	12.6
1780	91811.7	5594	17.8	104	16.4
1781	91830.6	8073	8.2	48	11.4
1782	91918.6	3598	82.7	483	25.5
1783	91928.6	6331	72.3	422	14.5
1784	92018.7	10296	121.2	708	8.9
1785	92058.6	5021	29.1	170	18.3
1786	92125.9	9449	91.8	536	9.8
1787	92149.1	8101	78.9	461	11.4
1788	92210.3	4934	4	23	18.7
1789	92268.7	7571	2.4	14	12.2
1790	92320.1	12625	374.5	2186	7.3
1791	92327.1	8117	382.4	2233	11.4
1792	92386.3	4468	25.1	146	20.7
1793	92400.5	5713	13.8	81	16.2
1794	92419	6553	21.7	127	14.1
1795	92433.6	6562	39.4	230	14.1
1796	92449.8	4688	50.1	292	19.7
1797	92460.6	4064	70.5	412	22.8
1798	92485.9	5174	55.6	325	17.9
1799	92497.2	7115	54.3	317	13
1800	92509	5693	73.1	427	16.3
1801	92519.6	5993	77.2	451	15.4
1802	92531.9	6146	74.5	435	15.1
1803	92543.9	5970	59	345	15.5
1804	92629.9	11401	47.5	278	8.1
1805	92635.4	4663	48.3	282	19.9
1806	92710.4	8083	8.7	51	11.5
1807	92742.3	9482	6.4	37	9.8
1808	92773.4	7533	13.9	81	12.3
1809	92802	7862	30.3	177	11.8
1810	92875.4	7144	310.7	1814	13
1811	92911.3	8796	211.9	1237	10.6
1812	92984.7	3815	42.1	246	24.4
1813	93020.1	4978	172.8	1009	18.7
1814	93058.2	5206	28.4	166	17.9
1815	93116.2	5209	6	35	17.9
1816	93151.6	114648	18.7	109	0.8
1817	93158.6	5212	19.6	114	17.9
1818	93252	5222	2.1	12	17.9
1819	93300.5	6567	329.8	1925	14.2
1820	93313.2	5513	491.8	2871	16.9
1821	93441.3	8215	134.7	786	11.4
1822	93504.2	9590	5.9	34	9.8
1823	93612.5	5074	358.7	2094	18.4
1824	93662.3	5489	29.6	173	17.1
1825	93680.1	3843	28.2	165	24.4
1826	93700.8	6070	22	128	15.4
1827	93729.8	7921	43.2	252	11.8
1828	93760.7	8615	24.9	145	10.9
1829	93775.3	6412	11.6	68	14.6
1830	93791.8	7863	34.7	203	11.9
1831	93821.4	5147	107.9	630	18.2
1832	93854.1	6447	215.8	1260	14.6
1833	93866.8	10503	160.6	937	8.9
1834	93880.7	10504	179.7	1049	8.9
1835	93889.1	9630	183.2	1069	9.8
1836	93986.6	6256	35.2	206	15
1837	94001.5	5785	41.2	240	16.3
1838	94015.4	8265	63	368	11.4
1839	94137	6098	13.6	79	15.4
1840	94147.3	5518	15.9	93	17.1
1841	94162.6	4628	17.9	105	20.3
1842	94177.7	4806	15.3	89	19.6
1843	94189.7	5796	11.4	67	16.3
1844	94211.6	5495	16.3	95	17.1
1845	94226.6	11597	21.9	128	8.1
1846	94247	7250	27.6	161	13
1847	94269	12456	14.3	83	7.6
1848	94276	9669	14.3	83	9.8
1849	94299	3533	22.1	129	26.7
1850	94313.2	8291	17	99	11.4
1851	94363.4	8296	10.1	59	11.4
1852	94427.1	9685	724.8	4232	9.8
1853	94434.4	8941	720	4203	10.6
1854	94548.9	9697	215.4	1258	9.8
1855	94554.3	9698	211.3	1234	9.8
1856	94626.9	9705	3.6	21	9.8
1857	94658.2	8322	12.7	74	11.4
1858	94716.2	8967	95.3	556	10.6
1859	94748.3	10195	67	391	9.3
1860	94779.6	11223	77.8	454	8.4
1861	94810.5	11517	54.9	321	8.2
1862	94842.1	8713	14.1	82	10.9
1863	94873.1	6565	8.4	49	14.5
1864	94924.1	7302	27.9	163	13
1865	94936.5	5311	31.1	181	17.9
1866	94981.9	8992	54.1	316	10.6
1867	95064.9	10637	38.8	226	8.9
1868	95076.1	5092	53.5	312	18.7
1869	95106.1	6752	262.4	1532	14.1
1870	95111.5	7505	259.9	1517	12.7
1871	95242.4	4964	158.5	925	19.2
1872	95268.5	5407	177.1	1034	17.6
1873	95324.1	5333	3.9	23	17.9
1874	95366.1	5335	15.8	92	17.9
1875	95379	6522	13.5	79	14.6
1876	95401.9	8387	7.8	45	11.4
1877	95449.7	8391	21.2	124	11.4
1878	95469.5	3790	30.2	176	25.2
1879	95516.3	7128	245.4	1433	13.4
1880	95531.9	4537	389.6	2275	21.1
1881	95544.5	4294	578.4	3377	22.3
1882	95561.1	7351	393.8	2299	13
1883	95683.1	6471	154.3	901	14.8
1884	95767.6	8977	21.4	125	10.7
1885	95798.9	11379	21.8	127	8.4
1886	95830.5	7325	49	286	13.1
1887	95862.2	6835	56.8	332	14
1888	95877	7867	30.5	178	12.2
1889	95893.3	4504	44.7	261	21.3
1890	95905.4	5902	34.9	204	16.3
1891	95922.4	4971	40.8	238	19.3
1892	95936.2	5108	31.5	184	18.8
1893	95955.8	4449	32	187	21.6
1894	95971.4	4748	46.5	271	20.2
1895	95984	6563	50.9	297	14.6
1896	96016.9	118175	18.7	109	0.8
1897	96026	7387	19.2	112	13
1898	96064.6	7736	8.5	50	12.4
1899	96100.5	7392	105.3	615	13
1900	96245.3	6241	73.9	431	15.4
1901	96279.2	4086	54.4	318	23.6
1902	96298	6487	50.3	293	14.8
1903	96306	6985	50.2	293	13.8
1904	96401.2	5932	83.9	490	16.3
1905	96455	3931	23.6	138	24.5
1906	96514.7	10799	64	373	8.9
1907	96526.8	4910	93.5	546	19.7
1908	96541	4753	112.2	655	20.3
1909	96673.3	4576	61	356	21.1
1910	96724	7440	20	116	13
1911	96787.8	6553	247.4	1444	14.8
1912	96802	5577	193.8	1132	17.4
1913	96818.2	10502	433.5	2531	9.2
1914	96834.1	5027	240.5	1404	19.3
1915	96850	9525	546	3188	10.2
1916	96865.1	5961	224.5	1311	16.3
1917	96880.2	7597	264.4	1544	12.8
1918	96912.6	5858	61	356	16.5
1919	96939	6628	13.8	81	14.6
1920	96955.5	3315	16.5	96	29.3
1921	97001.3	5541	82.8	483	17.5
1922	97011.8	5427	81.3	474	17.9
1923	97074.7	5457	22.4	131	17.8
1924	97087.8	6010	21.5	126	16.2
1925	97132.7	5434	8.1	48	17.9
1926	97203.2	10085	25.5	149	9.6
1927	97212.9	7976	28.6	167	12.2
1928	97227.2	4602	36.4	212	21.1
1929	97239.7	5984	35	204	16.3
1930	97262.5	7482	27.3	159	13
1931	97299.1	7485	80.6	471	13
1932	97311.3	6654	73.5	429	14.6
1933	97326.9	5989	69.2	404	16.3
1934	97340.7	4471	73.5	429	21.8
1935	97388.7	4994	128.1	748	19.5
1936	97408.4	8563	117	683	11.4
1937	97424.1	9992	125.8	734	9.8
1938	97431.4	7054	132.5	774	13.8
1939	97547.7	7062	51.9	303	13.8
1940	97568	120084	38.1	222	0.8
1941	97575.5	7755	37.2	217	12.6
1942	97633.8	3764	43.7	255	25.9
1943	97647.3	5796	32.8	191	16.8
1944	97659.8	5444	22.5	132	17.9
1945	97668.8	4625	19.8	116	21.1
1946	97699.2	7515	8.4	49	13
1947	97714.5	6998	17.4	101	14
1948	97734.5	4039	31.5	184	24.2
1949	97748.7	4527	47.3	276	21.6
1950	97774.5	10940	35.1	205	8.9
1951	97805.5	8889	242.8	1418	11
1952	97836.5	9929	180.7	1055	9.9
1953	97868.9	9262	82.8	484	10.6
1954	97900.7	9320	15.1	88	10.5
1955	97933.2	4433	5.6	33	22.1
1956	97992.7	5649	14.5	85	17.3
1957	97999	7095	14.9	87	13.8
1958	98028.4	6033	28.1	164	16.3
1959	98051.9	3662	19.2	112	26.8
1960	98115.5	3659	9	52	26.8
1961	98176.8	7108	192.4	1123	13.8
1962	98191.3	7109	214.5	1252	13.8
1963	98329.5	7564	56.9	332	13
1964	98339.4	11003	49.5	289	8.9
1965	98385	6373	8.7	51	15.4
1966	98501.7	7802	357.3	2086	12.6
1967	98543.7	5524	41.6	243	17.8
1968	98580.8	5590	155.8	909	17.6
1969	98598.1	4830	199.8	1167	20.4
1970	98609.5	5674	192.5	1124	17.4
1971	98626.2	5597	161.4	942	17.6
1972	98659.9	3767	14.6	85	26.2
1973	98700.6	5522	14.3	83	17.9
1974	98767.4	3220	67	391	30.7
1975	98803.1	10134	71.9	420	9.8
1976	98822.8	7709	45.6	267	12.8
1977	98857.2	7716	29.8	174	12.8
1978	98890.1	7220	136.7	798	13.7
1979	98921.1	6035	296.9	1733	16.4
1980	98950.9	6802	56.3	328	14.5
1981	99049.2	4105	114.5	669	24.1
1982	99083.1	10162	128	747	9.8
1983	99141.8	4881	28.9	169	20.3
1984	99171.1	5086	24.9	146	19.5
1985	99183.6	6104	27.4	160	16.3
1986	99218.6	5466	115.2	673	18.2
1987	99300.6	3496	1.7	10	28.4
1988	99337.1	4198	5.8	34	23.7
1989	99365.3	5559	9.8	57	17.9
1990	99400.1	6439	4.6	27	15.4
1991	99460.4	5708	449.1	2622	17.4
1992	99477.6	4535	521.1	3042	21.9
1993	99491.1	3797	471.3	2752	26.2
1994	99639.4	4937	122.3	714	20.2
1995	99751.7	2923	2.4	14	34.1
1996	99811.5	4787	17.6	103	20.9
1997	99823.2	4914	16.9	99	20.3
1998	99842.6	7613	28.4	166	13.1
[truncated: 640 more rows]

## Sheet: 3B-C - Ub+MBP+Cnt+BcPAP
Peak 1 (2-4 kDa)		RT: 4.3-4.7 min					"main" peak (10-120 kDa)		RT: 5.1-6.4 Min
#	m/z	Res.	S/N	I	FWHM		#	m/z	Res.	S/N	I	FWHM
1	2221	14840	1.6	181	0.1		1	10013.1	1583	1.9	12	6.3
2	2221.8	14581	1.5	165	0.2		2	10031.2	2167	68.5	424	4.6
3	2222.5	12750	0.2	26	0.2		3	10044.2	1647	9.4	58	6.1
4	2226.6	11440	0.2	19	0.2		4	10071.7	2062	2.9	18	4.9
5	2227	11738	0.1	14	0.2		5	10171.4	1729	4	25	5.9
6	2231.5	11629	0.1	13	0.2		6	10183.1	1380	5.5	34	7.4
7	2232.3	12381	0.2	25	0.2		7	10289.2	1623	1.9	12	6.3
8	2233	13995	1	114	0.2		8	10315.3	1555	57.9	358	6.6
9	2233.8	12817	0.8	92	0.2		9	10329.9	995	68.6	425	10.4
10	2234.2	9403	4.6	515	0.2		10	10353.6	1870	18.8	116	5.5
11	2234.9	4654	45.4	5062	0.5		11	10367.5	1573	7.1	44	6.6
12	2235.5	7684	30.1	3358	0.3		12	10470	1022	1489	9215	10.2
13	2236	14678	26.5	2955	0.2		13	10514.6	2576	97.6	604	4.1
14	2236.8	15224	13.1	1459	0.1		14	10530.1	1782	117.2	725	5.9
15	2237.5	14520	20.7	2305	0.2		15	10543.1	2430	162.1	1003	4.3
16	2238.3	13752	22.1	2458	0.2		16	10558	2125	19.7	122	5
17	2239	14871	16.6	1854	0.2		17	10588.4	1637	54.7	338	6.5
18	2239.8	14343	9.1	1009	0.2		18	10654.6	2196	4.4	27	4.9
19	2240.5	12675	4.6	518	0.2		19	10764.9	1318	38.1	236	8.2
20	2241.3	11523	0.9	98	0.2		20	10784.4	2161	14.9	92	5
21	2245	13469	0.2	20	0.2		21	10800.5	1728	4.9	30	6.2
22	2245.8	13160	0.3	36	0.2		22	10848.6	1684	19.9	123	6.4
23	2247.3	11349	0.3	29	0.2		23	10924.4	2162	4	24	5.1
24	2248	14374	11.5	1278	0.2		24	10984.1	2161	2.1	13	5.1
25	2248.3	11180	2.4	263	0.2		25	11051	2183	3.2	20	5.1
26	2248.7	15932	17.2	1912	0.1		26	11063.7	2468	9.4	58	4.5
27	2249.5	15229	10.2	1139	0.1		27	11082.1	2359	25.4	157	4.7
28	2250.2	13771	3.5	390	0.2		28	11104.5	1367	135.4	838	8.1
29	2251	13984	0.8	87	0.2		29	11149	2425	5.7	35	4.6
30	2251.7	12855	1.5	162	0.2		30	11215.5	2585	2.2	13	4.3
31	2252.1	13405	1.5	168	0.2		31	11233.1	2279	5	31	4.9
32	2252.4	14852	0.9	97	0.2		32	11282.9	2283	8.1	50	4.9
33	2254	14955	2.9	327	0.2		33	11386.9	1400	4.2	26	8.1
34	2254.7	15551	8.5	952	0.1		34	11550.1	2177	10.4	64	5.3
35	2255.5	14139	6.9	766	0.2		35	11629.3	2031	27.7	171	5.7
36	2256.2	13330	1.5	163	0.2		36	11646	1882	14.8	91	6.2
37	2257	13711	0.4	47	0.2		37	11701.8	2046	24.7	153	5.7
38	2257.7	15456	6.7	747	0.1		38	11705.8	1825	22.8	141	6.4
39	2258.1	13292	1.1	120	0.2		39	11766.7	2446	7.5	46	4.8
40	2258.4	13326	1.9	214	0.2		40	11799.5	2282	3.5	22	5.2
41	2259.2	13590	3.8	423	0.2		41	11853	2340	7.3	45	5.1
42	2260	14876	2	225	0.2		42	11867.6	1748	2	12	6.8
43	2260.7	15569	4.8	536	0.1		43	11897.5	1815	2.8	17	6.6
44	2261.5	16131	13.1	1457	0.1		44	11914.9	2519	2.5	15	4.7
45	2262.2	13673	14.4	1605	0.2		45	11964.3	1030	2.1	13	11.6
46	2263	14433	7	785	0.2		46	12032.7	1700	12	74	7.1
47	2263.7	15995	2.9	318	0.1		47	12062.3	2058	8.4	52	5.9
48	2264.4	14464	1.6	178	0.2		48	12078.6	1239	3	18	9.8
49	2269	10029	0.8	89	0.2		49	12149.6	2288	2.4	15	5.3
50	2269.7	13345	1.9	213	0.2		50	12217.9	2099	15.7	97	5.8
51	2270.4	10840	0.6	71	0.2		51	12272.9	2138	26.9	166	5.7
52	2271.4	12298	1.9	209	0.2		52	12316.4	1562	8.1	50	7.9
53	2272.1	15303	2.9	319	0.1		53	12371.5	2423	5.2	32	5.1
54	2272.8	15172	0.8	93	0.1		54	12492.9	1582	1.9	12	7.9
55	2273.6	10400	0.2	17	0.2		55	12511	2272	4	25	5.5
56	2275	12283	0.2	21	0.2		56	12587	1882	3.2	20	6.7
57	2286.7	13187	1.1	123	0.2		57	12607.3	2107	6.9	43	6
58	2287.7	13447	0.4	46	0.2		58	12660.9	2084	5.6	35	6.1
59	2288.4	13980	0.6	64	0.2		59	12672.8	1657	2	12	7.6
60	2289.8	11103	0.3	34	0.2		60	12743.3	1567	3.4	21	8.1
61	2290.1	8554	0.4	46	0.3		61	12765.4	2442	3.2	20	5.2
62	2290.7	12281	0.2	17	0.2		62	12875.7	1750	18.4	114	7.4
63	2291.5	13366	0.6	64	0.2		63	12893.7	2730	157	972	4.7
64	2292	7323	0.4	46	0.3		64	12908.2	2129	185.1	1145	6.1
65	2292.7	9546	3.1	346	0.2		65	12924.1	1972	47.3	293	6.6
66	2293.4	14694	0.1	15	0.2		66	12945.2	2544	2.3	14	5.1
67	2298.2	7304	0.7	81	0.3		67	13092.9	1393	498.5	3085	9.4
68	2298.9	5848	0.2	18	0.4		68	13143.8	2869	183.7	1137	4.6
69	2300.4	11098	2	222	0.2		69	13152.5	2002	255.1	1579	6.6
70	2301.1	9935	0.4	42	0.2		70	13170.1	3086	1065.2	6592	4.3
71	2302.1	10122	0.9	95	0.2		71	13195.8	1979	22.9	142	6.7
72	2302.7	8668	0.8	91	0.3		72	13235.6	2021	10.4	64	6.5
73	2303	12482	1.2	134	0.2		73	13334.4	2096	9.9	61	6.4
74	2303.5	11261	1.7	189	0.2		74	13375.9	2817	52.4	324	4.7
75	2304.1	14409	1.6	177	0.2		75	13457	1952	140.5	869	6.9
76	2304.6	13972	3.3	371	0.2		76	13479.9	2045	5.9	37	6.6
77	2305.1	10424	0.5	59	0.2		77	13496.2	2505	23.9	148	5.4
78	2305.6	7859	0.4	41	0.3		78	13516	1829	4.5	28	7.4
79	2306.1	13521	0.6	70	0.2		79	13671.3	2517	2.5	16	5.4
80	2306.6	6151	0.2	23	0.4		80	13682.3	2444	2.5	16	5.6
81	2307.1	11142	1.2	131	0.2		81	13744.8	2518	1.7	10	5.5
82	2307.5	8358	0.8	92	0.3		82	13786.1	2680	3	18	5.1
83	2307.7	6542	0.9	98	0.4		83	13828.9	2781	31.4	194	5
84	2308.4	7863	3.9	430	0.3		84	13865.1	2218	1.9	12	6.3
85	2309.1	7069	14.2	1579	0.3		85	13887	1473	4.3	27	9.4
86	2309.7	4118	26.4	2939	0.6		86	13899.4	3100	26.8	166	4.5
87	2310.6	4297	14.4	1604	0.5		87	13916.4	2429	1.7	10	5.7
88	2311.1	6727	8.9	991	0.3		88	14075.2	1586	15.1	93	8.9
89	2312.1	10142	15.8	1763	0.2		89	14119.3	1754	19.2	119	8
90	2312.8	8361	6.2	696	0.3		90	14161.9	2538	20.1	124	5.6
91	2313.5	4814	7.1	793	0.5		91	14207.6	2710	682.4	4223	5.2
92	2314.3	61714	6.9	771	0		92	14273.3	1700	28.8	178	8.4
93	2315.1	9353	9	1001	0.2		93	14289.1	1544	28	174	9.3
94	2315.5	7348	3.1	349	0.3		94	14359.8	2811	3.5	21	5.1
95	2316.1	10131	3.7	416	0.2		95	14438.8	1559	3.6	22	9.3
96	2316.7	10004	3.7	414	0.2		96	14469.8	1463	4.9	30	9.9
97	2317.5	6500	5.7	636	0.4		97	14487.6	1833	2.9	18	7.9
98	2318.1	7357	10.8	1200	0.3		98	14597.9	2327	7.7	48	6.3
99	2319	7385	5.3	592	0.3		99	14663.2	2333	5.4	34	6.3
100	2319.6	3636	4.8	540	0.6		100	14708.2	2096	5.4	33	7
101	2322.7	5983	0.5	60	0.4		101	14752.7	2439	8.6	53	6
102	2330.1	14633	6.3	702	0.2		102	14801.7	3935	4.8	30	3.8
103	2331.1	13858	0.4	49	0.2		103	14823.4	1585	10.3	64	9.4
104	2332.1	13143	3.2	360	0.2		104	14894.1	1916	1.9	12	7.8
105	2341.4	5260	8	892	0.4		105	14962	1471	8.2	50	10.2
106	2342	4853	6.6	731	0.5		106	14980.8	1826	3.2	20	8.2
107	2342.9	7888	3	334	0.3		107	15066.7	2088	9.6	59	7.2
108	2343.5	6673	3	332	0.4		108	15081.1	1743	12.5	78	8.7
109	2344.1	10276	3.1	343	0.2		109	15128.7	2824	2	12	5.4
110	2344.8	10493	0.7	80	0.2		110	15148	3337	1.6	10	4.5
111	2345.4	5712	0.5	58	0.4		111	15230.3	2405	2.1	13	6.3
112	2347.3	8728	0.6	71	0.3		112	15277	2987	3.2	20	5.1
113	2348.1	14779	0.6	62	0.2		113	15372.9	2684	2.9	18	5.7
114	2350.3	11774	1.4	151	0.2		114	15402.5	1952	4	25	7.9
115	2350.7	13798	0.4	39	0.2		115	15500.5	1804	4.2	26	8.6
116	2352.1	6356	8.2	915	0.4		116	15547.9	2070	5.1	31	7.5
117	2352.7	6821	10.7	1195	0.3		117	15572.7	2788	6.4	40	5.6
118	2353.4	6570	3.3	366	0.4		118	15603.2	2746	1.8	11	5.7
119	2354.2	9474	0.6	66	0.2		119	15620.9	2554	88.2	546	6.1
120	2355.1	6900	4.5	505	0.3		120	15637.2	2728	5.3	33	5.7
121	2355.6	6191	3.1	341	0.4		121	15693.2	2348	4	25	6.7
122	2356	8336	2.9	319	0.3		122	15699.9	1301	3	18	12.1
123	2357.6	11430	0.2	24	0.2		123	15715.1	2066	16.1	99	7.6
124	2359.1	15270	1.9	208	0.2		124	15731.7	1597	2.1	13	9.8
125	2360.6	14360	0.3	35	0.2		125	15787.2	2212	19.9	123	7.1
126	2366.2	9782	0.7	80	0.2		126	15793.5	3143	16.2	100	5
127	2372.7	10116	0.5	50	0.2		127	15812.8	1681	2.3	14	9.4
128	2375.1	12249	0.2	23	0.2		128	15832.4	2408	11.4	71	6.6
129	2376.1	9338	2.5	279	0.3		129	15863.4	3162	2.5	15	5
130	2376.7	7565	0.7	73	0.3		130	15885	2032	10.4	64	7.8
131	2377.1	7844	0.8	89	0.3		131	15904.8	3027	2.5	16	5.3
132	2378	8236	5.8	647	0.3		132	15931.3	2457	2.4	15	6.5
133	2378.3	6364	9.7	1084	0.4		133	15937	2167	1.6	10	7.4
134	2378.6	6370	8.3	924	0.4		134	15954.9	2461	1.9	12	6.5
135	2380.1	4815	83.3	9275	0.5		135	15979.9	2884	6.6	41	5.5
136	2382.2	3898	5.5	615	0.6		136	16050.3	2809	107.2	663	5.7
137	2382.7	8157	4.6	512	0.3		137	16063	2393	1.7	11	6.7
138	2383.1	16474	90.3	10057	0.1		138	16110.3	2318	2	12	7
139	2384.1	17154	107.9	12015	0.1		139	16178	1981	12.9	80	8.2
140	2384.6	10570	12.1	1350	0.2		140	16229.9	1406	1.6	10	11.5
141	2385.1	16563	66.6	7421	0.1		141	16246.4	1956	1.9	12	8.3
142	2385.5	9104	11.2	1244	0.3		142	16271.6	2268	16.4	102	7.2
143	2386.2	16008	50.7	5652	0.1		143	16285.2	1924	22.6	140	8.5
144	2386.6	8522	1.7	194	0.3		144	16313.8	2608	4.1	25	6.3
145	2387.1	14612	30.7	3425	0.2		145	16364.1	1900	3.5	22	8.6
146	2387.6	10864	6.6	732	0.2		146	16387.2	2202	2	12	7.4
147	2388.1	13106	5.3	592	0.2		147	16492.6	2176	6.9	43	7.6
148	2389.1	14219	8.7	965	0.2		148	16642.1	1709	2.5	15	9.7
149	2389.5	15205	1.7	190	0.2		149	16662.2	1913	1446.4	8951	8.7
150	2389.9	15316	9.3	1040	0.2		150	16715.5	2174	5.7	35	7.7
151	2390.2	14842	9.3	1041	0.2		151	16945.8	2297	3.3	20	7.4
152	2390.6	15267	9.7	1076	0.2		152	17022.8	2894	6.9	43	5.9
153	2391.1	15537	5.2	577	0.2		153	17050.9	2914	13.2	82	5.9
154	2391.5	16103	1.9	216	0.1		154	17076.4	2503	4.9	31	6.8
155	2391.9	14756	3.5	390	0.2		155	17126.1	2428	2.3	14	7.1
156	2392.2	14811	5.3	592	0.2		156	17158.5	2125	9.6	59	8.1
157	2392.7	15878	16.6	1845	0.2		157	17178.5	1599	127.7	790	10.7
158	2393.1	14281	0.8	92	0.2		158	17200.7	1567	152.8	945	11
159	2393.4	14249	12.8	1424	0.2		159	17210.7	1584	123.2	763	10.9
160	2394.2	10522	6.3	702	0.2		160	17224.2	2204	27.4	170	7.8
161	2394.6	11408	3.6	404	0.2		161	17230.9	1956	35.8	222	8.8
162	2395.1	8727	4.2	469	0.3		162	17260.5	2839	4.2	26	6.1
163	2395.8	8927	1.6	183	0.3		163	17461.2	1874	3286	20335	9.3
164	2396.1	13370	2.6	290	0.2		164	17491.4	3531	85.3	528	5
165	2396.6	14824	12.1	1345	0.2		165	17522	2392	808.5	5003	7.3
166	2397.2	7852	6.9	764	0.3		166	17548.6	1679	1449.4	8970	10.5
167	2397.6	8702	15.8	1757	0.3		167	17563.8	1885	830.7	5141	9.3
168	2398.5	7198	8.4	931	0.3		168	17593.7	2473	147.7	914	7.1
169	2399.1	13682	3.1	347	0.2		169	17619.8	4265	9.3	58	4.1
170	2400.6	15134	0.1	14	0.2		170	17647.7	2316	267.4	1655	7.6
171	2401.4	12046	0.1	12	0.2		171	17725.6	3702	2.7	17	4.8
172	2402.1	14048	0.6	64	0.2		172	17831.7	3010	9.4	58	5.9
173	2403.4	7677	0.4	50	0.3		173	17920.9	2290	1.8	11	7.8
174	2404.2	10431	1.8	197	0.2		174	17941.3	2022	750.7	4646	8.9
175	2404.7	8742	1	115	0.3		175	17977.6	2626	3.4	21	6.8
176	2405.1	12138	5	556	0.2		176	17997.4	2433	55.3	342	7.4
177	2405.4	10274	2.1	231	0.2		177	18026.8	2995	1.7	10	6
178	2406.1	6529	1.4	161	0.4		178	18085.8	2153	51368	317885	8.4
179	2407.1	13238	2.7	295	0.2		179	18205.2	3776	49.6	307	4.8
180	2408.2	10589	6.1	682	0.2		180	18239.7	2090	2.2	14	8.7
181	2408.7	7613	6.2	690	0.3		181	18252.1	3686	12.6	78	5
182	2408.9	7767	5.8	641	0.3		182	18266.8	2680	1.6	10	6.8
183	2409.5	10768	4.5	498	0.2		183	18325.8	1892	1.9	12	9.7
184	2410.1	9161	2.1	239	0.3		184	18440.7	2578	2.1	13	7.2
185	2410.6	11071	0.9	105	0.2		185	18496.2	2013	2	13	9.2
186	2411.1	9793	2.6	292	0.2		186	18531.4	2029	1.7	11	9.1
187	2412.3	4103	16.8	1866	0.6		187	18709.4	2526	3	18	7.4
188	2413.1	4596	12.3	1371	0.5		188	18725.1	3466	372.1	2303	5.4
189	2413.8	5364	6.2	693	0.4		189	18824.1	1887	1.9	12	10
190	2414.1	7385	5.3	596	0.3		190	18851	2912	1.7	11	6.5
191	2414.6	8054	1.8	196	0.3		191	18908.9	1771	2.7	17	10.7
192	2415.1	10998	1.2	138	0.2		192	18944.8	2247	3.4	21	8.4
193	2415.7	6531	2.6	288	0.4		193	18978	1949	2.2	14	9.7
194	2416.4	6854	6.4	715	0.4		194	19035.1	2593	40.7	252	7.3
195	2417.1	7909	12.3	1368	0.3		195	19061.4	2346	5.9	37	8.1
196	2417.8	7532	3.9	439	0.3		196	19090	3806	6.6	41	5
197	2418.7	11316	3.9	435	0.2		197	19119.4	3118	4.2	26	6.1
198	2419.4	7242	9	1000	0.3		198	19148.1	2804	9	56	6.8
199	2420.1	5022	5.9	653	0.5		199	19220.8	2688	2.3	14	7.2
200	2420.8	7460	3.5	385	0.3		200	19250.4	1729	3.7	23	11.1
201	2421	6552	3.7	414	0.4		201	19341.1	4097	3.4	21	4.7
202	2421.7	5808	5.9	652	0.4		202	19370.5	2436	4.2	26	8
203	2422.2	11140	8.1	898	0.2		203	19458.1	2602	1.8	11	7.5
204	2422.8	6738	7.8	874	0.4		204	19504.4	2451	4.6	28	8
205	2423.2	6521	16.1	1797	0.4		205	19515.3	1633	4.3	27	11.9
206	2423.5	2739	13.3	1478	0.9		206	19531.7	1627	2.1	13	12
207	2424	4884	13.4	1488	0.5		207	19547.5	2543	30.7	190	7.7
208	2424.7	5878	2.9	328	0.4		208	19609.1	2309	3.7	23	8.5
209	2425.5	11430	2	228	0.2		209	19636	2156	84.7	524	9.1
210	2426.2	6189	3.3	367	0.4		210	19665	1963	26.9	166	10
211	2426.5	6542	2.9	322	0.4		211	19734	3211	18	111	6.1
212	2427.1	11710	14.8	1652	0.2		212	19750.6	2850	39.9	247	6.9
213	2428.1	13760	12.8	1421	0.2		213	19765	2077	2.3	14	9.5
214	2428.6	11875	1.6	176	0.2		214	19825.7	1751	7.7	47	11.3
215	2429.1	12984	10.7	1195	0.2		215	19854.8	2540	2.8	17	7.8
216	2429.8	6727	3.5	392	0.4		216	19889.5	2291	2.5	15	8.7
217	2430.1	10704	8.2	917	0.2		217	19914.4	3202	4.7	29	6.2
218	2430.7	6236	3.1	341	0.4		218	19940.9	3222	2.4	15	6.2
219	2431.1	9550	3.4	374	0.3		219	19990.6	2796	35.2	218	7.1
220	2431.6	6682	2.2	244	0.4		220	20028.2	2808	4.3	26	7.1
221	2432.3	13622	4.1	455	0.2		221	20063.4	3002	358.2	2217	6.7
222	2433.1	14902	4.3	477	0.2		222	20076.6	1544	5.4	33	13
223	2433.9	14055	6.8	758	0.2		223	20087.1	2450	4.7	29	8.2
224	2434.6	13962	8.7	964	0.2		224	20151.5	2536	13	81	7.9
225	2435.3	12294	5.8	642	0.2		225	20182.3	2406	2.5	15	8.4
226	2436.1	12552	2.7	295	0.2		226	20215.6	2731	35.9	222	7.4
227	2436.7	6975	3.3	365	0.3		227	20243.3	3019	2.9	18	6.7
228	2437.9	3837	16.4	1828	0.6		228	20274.4	3211	2.5	16	6.3
229	2438.1	4064	18.7	2085	0.6		229	20305.1	2505	2.7	17	8.1
230	2439.1	9281	6.8	753	0.3		230	20359.3	2812	6.9	43	7.2
231	2439.7	6448	1.4	161	0.4		231	20440.9	1876	2	12	10.9
232	2440.2	10210	3.5	392	0.2		232	20460.5	2842	2.2	13	7.2
233	2440.6	10217	3	335	0.2		233	20493.5	2222	13.6	84	9.2
234	2441.1	8875	6.9	770	0.3		234	20523.9	2630	3.8	24	7.8
235	2441.9	4457	2	219	0.5		235	20578.8	2425	2	12	8.5
236	2442.7	10137	1	112	0.2		236	20628.1	3075	1.6	10	6.7
237	2443.2	11138	5.8	648	0.2		237	20712.2	2931	6.3	39	7.1
238	2444.2	5585	4.9	544	0.4		238	20731.2	3014	3.8	23	6.9
239	2444.6	11994	5.3	596	0.2		239	20769.4	2266	9.7	60	9.2
240	2445.5	11453	4.1	456	0.2		240	20801.1	2137	28.2	175	9.7
241	2446.1	8397	4.5	499	0.3		241	20826.8	3063	8.5	52	6.8
242	2446.7	15679	0.7	79	0.2		242	20849.9	4231	5.4	34	4.9
243	2447.1	11813	2.6	284	0.2		243	20937.3	1691	39.3	243	12.4
244	2448.3	10598	3.7	417	0.2		244	20959.2	2360	5.1	32	8.9
245	2448.7	6428	3.5	389	0.4		245	21119.2	2975	17.6	109	7.1
246	2449.4	10649	3.1	344	0.2		246	21173.3	3437	32.6	202	6.2
247	2449.8	11115	4.1	459	0.2		247	21207	4017	4.5	28	5.3
248	2450.2	6586	2.1	234	0.4		248	21239	3797	3.5	21	5.6
249	2450.7	9558	4.8	538	0.3		249	21278.8	1952	6.4	40	10.9
250	2451	8101	4.9	545	0.3		250	21311	3597	277	1714	5.9
251	2451.5	7522	6.8	758	0.3		251	21375.2	2506	26.1	161	8.5
252	2452.2	5821	15.4	1718	0.4		252	21394.3	2668	8.6	53	8
253	2452.6	4694	16	1781	0.5		253	21408.8	2655	4.2	26	8.1
254	2453.1	3848	14.1	1571	0.6		254	21472.4	2193	3.3	20	9.8
255	2454.1	7683	6.2	690	0.3		255	21528.9	2173	9.1	56	9.9
256	2454.6	10041	5.3	587	0.2		256	21565.8	2544	4.4	27	8.5
257	2455.5	5716	10.7	1194	0.4		257	21699.3	2979	17.8	110	7.3
258	2456.6	7814	10.6	1181	0.3		258	21716.5	4499	12.1	75	4.8
259	2458	6941	3.8	427	0.4		259	21730.4	3267	12.9	80	6.7
260	2459.3	11521	14.6	1624	0.2		260	21744.7	1931	5.5	34	11.3
261	2459.7	6912	4.3	484	0.4		261	21833.1	2156	3.3	21	10.1
262	2460.3	14733	13.2	1467	0.2		262	21845	1727	3.6	22	12.6
263	2460.6	13244	3.2	359	0.2		263	21890.9	2579	17	105	8.5
264	2461.3	14047	2.6	288	0.2		264	21923.5	2988	2	12	7.3
265	2461.9	9063	1.9	211	0.3		265	21941.7	2663	3	18	8.2
266	2462.2	10837	4.3	479	0.2		266	21965.1	3247	41.4	256	6.8
267	2462.8	7710	3.5	387	0.3		267	21997.1	2641	1.8	11	8.3
268	2463	7823	3.7	409	0.3		268	22101.8	1912	3.1	19	11.6
269	2463.4	6358	4.8	534	0.4		269	22128.2	2821	9.4	58	7.8
270	2464.2	11271	4.2	465	0.2		270	22201	2204	9.1	56	10.1
271	2464.6	12977	3.6	400	0.2		271	22213.3	2153	24	149	10.3
272	2465.4	5722	2.1	237	0.4		272	22232.1	2845	17	105	7.8
273	2465.9	9156	3.2	361	0.3		273	22298.2	3070	30.7	190	7.3
274	2466.7	7994	6	672	0.3		274	22331.7	2364	38.5	238	9.4
275	2467.4	7371	8.6	962	0.3		275	22430.8	2711	20.8	129	8.3
276	2468.2	12751	9.3	1034	0.2		276	22465	3125	48.7	301	7.2
277	2468.6	13103	17.8	1979	0.2		277	22563.7	2259	23.5	145	10
278	2469	5555	8.2	914	0.4		278	22578.8	2263	8.7	54	10
279	2469.4	7317	6.5	729	0.3		279	22594	2771	2.5	15	8.2
280	2469.7	6696	7.7	856	0.4		280	22617.3	3422	1.9	12	6.6
281	2470.1	14510	49.9	5559	0.2		281	22662.3	4124	7.6	47	5.5
282	2470.6	8412	9.1	1010	0.3		282	22694.7	3705	15	93	6.1
283	2471.1	3887	5.2	583	0.6		283	22756.2	3016	3.9	24	7.5
284	2471.6	14225	18.3	2033	0.2		284	22801	3091	7.6	47	7.4
285	2472.1	8627	3	336	0.3		285	22912.8	2474	4.3	26	9.3
286	2472.7	7668	2.2	246	0.3		286	22949.8	3267	6.6	41	7
287	2473.2	9550	12	1336	0.3		287	23014.8	2899	4.8	30	7.9
288	2473.5	7948	6.1	683	0.3		288	23049.3	3898	8.6	53	5.9
289	2474.2	6672	9.6	1073	0.4		289	23103.8	2588	4	25	8.9
290	2474.6	11940	13.2	1466	0.2		290	23107.3	3241	3.9	24	7.1
291	2475.1	5569	5.7	640	0.4		291	23165.4	2162	3.6	22	10.7
292	2475.8	8328	2.5	284	0.3		292	23184.4	2311	10.2	63	10
293	2476.2	10095	2.1	228	0.2		293	23257.5	2087	12.9	80	11.1
294	2476.7	12173	2.4	267	0.2		294	23291.9	2575	4.8	30	9
295	2477.3	9413	9.4	1051	0.3		295	23324.6	2590	2.2	13	9
296	2477.7	7822	3.4	375	0.3		296	23360.3	2578	7.6	47	9.1
297	2478.3	13221	9.6	1068	0.2		297	23401.7	2160	16.3	101	10.8
298	2478.7	12996	1	114	0.2		298	23412.1	2718	5.8	36	8.6
299	2479.3	16720	10.3	1146	0.1		299	23455	2784	1.7	10	8.4
300	2479.8	8032	1.7	189	0.3		300	23514.4	1745	4.6	28	13.5
301	2480.3	12061	4.8	536	0.2		301	23532.7	2537	20.6	128	9.3
302	2480.7	8045	4.2	468	0.3		302	23564.5	2795	5.9	36	8.4
303	2481	11456	6.4	718	0.2		303	23598.1	2327	2	12	10.1
304	2481.4	10680	13.9	1549	0.2		304	23606	2796	2.2	13	8.4
305	2481.8	11327	15.1	1677	0.2		305	23618.2	3142	2.8	17	7.5
306	2482.2	12546	14.4	1605	0.2		306	23654.1	2226	1.9	12	10.6
307	2482.6	13626	8.5	946	0.2		307	23674.2	2189	5.7	35	10.8
308	2484.2	13255	2.1	235	0.2		308	23710.2	2414	4.3	27	9.8
309	2485	5522	6.7	750	0.4		309	23735.5	2123	11.2	70	11.2
310	2485.5	6788	9	998	0.4		310	23796.4	2819	10.4	65	8.4
311	2485.9	13201	18.7	2087	0.2		311	23822.8	1875	12.4	77	12.7
312	2486.6	10160	2.7	300	0.2		312	23894.4	3159	3.3	21	7.6
313	2487.3	6102	1.9	214	0.4		313	23913.1	2629	4.1	25	9.1
314	2488.1	5691	4	446	0.4		314	23925.2	2556	6.5	40	9.4
315	2489.2	15290	28.5	3174	0.2		315	23946.9	3213	3.3	20	7.5
316	2489.8	10737	1.6	178	0.2		316	23993.9	1837	2.1	13	13.1
317	2491.3	14757	7.5	832	0.2		317	24065.3	2630	15.8	97	9.2
318	2495.8	7583	0.1	12	0.3		318	24095	3245	6.4	40	7.4
319	2496.7	13144	0.5	61	0.2		319	24111.7	1969	4.8	30	12.2
320	2497.3	13391	1.1	121	0.2		320	24124.7	2203	6.1	38	11
321	2498.2	12171	0.1	13	0.2		321	24153.4	2281	1.8	11	10.6
322	2499.3	4612	1.4	152	0.5		322	24233.8	3426	10.8	67	7.1
323	2500.2	8105	2.5	282	0.3		323	24261.3	2160	2.2	14	11.2
324	2500.5	8946	2.1	235	0.3		324	24320.1	2874	5	31	8.5
325	2501.2	11702	0.2	27	0.2		325	24333.9	2358	1.7	11	10.3
326	2502.2	11701	1	115	0.2		326	24355.3	2079	1.7	10	11.7
327	2502.6	11397	2.6	287	0.2		327	24369.8	1800	1.9	12	13.5
328	2503.1	8630	4	446	0.3		328	24379.3	1956	2.4	15	12.5
329	2503.8	10935	0.9	98	0.2		329	24436	2130	7.5	47	11.5
330	2504.7	14588	0.2	22	0.2		330	24468.5	3004	19.7	122	8.1
331	2505.8	11492	0.2	20	0.2		331	24545.2	2128	3.3	20	11.5
332	2506.3	12509	1.1	119	0.2		332	24583.4	3090	4.4	27	8
333	2506.7	11682	1	113	0.2		333	24631.4	2239	12.2	76	11
334	2507.3	8529	4.3	478	0.3		334	24679.1	3424	3.3	20	7.2
335	2508.2	7693	2.8	314	0.3		335	24705	2979	6.3	39	8.3
336	2508.6	10377	0.8	90	0.2		336	24742	3584	2.1	13	6.9
337	2509.2	7824	1.7	194	0.3		337	24754.1	2608	2.3	14	9.5
338	2509.8	12790	3.1	350	0.2		338	24777.6	3201	16.1	100	7.7
339	2510.7	8991	3.1	345	0.3		339	24979.5	2346	32.6	202	10.6
340	2511.4	8175	2.6	292	0.3		340	25018	2890	9.2	57	8.7
341	2512.2	11698	1	107	0.2		341	25049	2275	2.5	15	11
342	2513.3	11830	6.3	707	0.2		342	25083.9	2046	1.9	11	12.3
343	2513.8	10970	11.7	1306	0.2		343	25095.2	2410	2	12	10.4
344	2514.2	11544	10.8	1203	0.2		344	25113.7	3035	4.1	25	8.3
345	2515	11728	7.2	806	0.2		345	25138.6	2741	14.8	92	9.2
346	2515.4	11157	5.7	635	0.2		346	25171.5	3118	6.3	39	8.1
347	2516.3	10760	2.4	267	0.2		347	25200.4	1447	3.3	20	17.4
348	2516.6	11019	2	221	0.2		348	25320	1832	11.6	72	13.8
349	2517.1	7924	3.3	372	0.3		349	25343.2	3365	14.7	91	7.5
350	2517.3	9061	3.2	351	0.3		350	25373.9	2674	11.4	71	9.5
351	2517.9	14481	14.9	1665	0.2		351	25409.7	3346	25.4	157	7.6
352	2518.2	11872	9.4	1044	0.2		352	25452.8	1627	5.3	33	15.6
353	2518.9	6316	7.2	798	0.4		353	25486.4	2114	20.4	126	12.1
354	2519.8	9708	4.3	483	0.3		354	25528.7	3661	4.9	30	7
355	2520.6	13382	1.6	179	0.2		355	25713.5	2322	7.5	47	11.1
356	2521.4	11888	1.2	135	0.2		356	25748.9	1556	170.5	1055	16.5
357	2521.8	12918	2.5	274	0.2		357	25774.3	1917	111.5	690	13.4
358	2522.2	13757	6.7	752	0.2		358	25789	3088	944.3	5844	8.4
359	2522.6	9670	5.5	613	0.3		359	25812.3	2288	523.5	3239	11.3
360	2523	7433	5.6	629	0.3		360	25829	2086	874.2	5410	12.4
361	2523.8	6856	2.5	275	0.4		361	25850.5	1933	105.2	651	13.4
362	2524.2	11885	3.4	383	0.2		362	25869.3	1743	25.4	157	14.8
363	2525	8778	2.5	282	0.3		363	25888.9	2921	8.2	51	8.9
364	2525.8	13261	2.5	281	0.2		364	25910.3	2306	18.9	117	11.2
365	2527.3	9594	0.1	13	0.3		365	26188.8	3088	13268.2	82109	8.5	Deconvolution artefact
366	2529.1	5701	2.8	310	0.4		366	26212.4	1936	1407.3	8709	13.5
367	2529.8	8716	5.4	599	0.3		367	26237.7	4882	70.4	436	5.4
368	2530.2	8448	2	218	0.3		368	26280.1	2538	1442.7	8928	10.4
369	2530.6	7889	5.1	566	0.3		369	26309.2	1931	1899.7	11756	13.6
370	2532.1	5330	7.3	818	0.5		370	26348.4	2581	2654	16424	10.2
371	2532.6	9038	3.7	411	0.3		371	26389.6	3263	736	4555	8.1
372	2533.2	10039	5.1	564	0.3		372	26429.3	5498	131.6	814	4.8
373	2533.9	8183	4.2	473	0.3		373	26469.1	3042	961	5947	8.7
374	2534.5	5632	11.4	1267	0.4		374	26508.8	5904	18.1	112	4.5
375	2534.9	4913	11.4	1275	0.5		375	26588.6	4226	3.8	24	6.3
376	2536.1	9922	3.2	360	0.3		376	26643.1	5761	2.8	17	4.6
377	2536.6	6404	3.3	363	0.4		377	26652.9	5017	6.3	39	5.3
378	2537.5	6669	2.9	327	0.4		378	26750.8	3482	9.2	57	7.7
379	2540.7	13535	0.5	61	0.2		379	26869.5	2540	2.7	17	10.6
380	2541	6929	0.2	22	0.4		380	26910.5	2387	911.8	5643	11.3
381	2543.3	13297	0.4	39	0.2		381	26946.8	3617	21.2	131	7.4
382	2544.1	8149	4.2	464	0.3		382	26966.2	1810	12.8	79	14.9
383	2544.6	9679	3.9	430	0.3		383	26992.6	2932	50.2	311	9.2
384	2545	6146	3.5	389	0.4		384	27031.3	2399	6.9	42	11.3
385	2545.4	7005	1.2	139	0.4		385	27126.7	2312	44.6	276	11.7
386	2545.8	11101	1.5	168	0.2		386	27160.6	3230	1.8	11	8.4
387	2547.8	11645	0.4	41	0.2		387	27266.9	3448	2.8	17	7.9
388	2548.2	13700	1	111	0.2		388	27282	2729	2.1	13	10
389	2548.6	13438	2.1	235	0.2		389	27295.6	1663	3.7	23	16.4
390	2549.3	9708	2.1	231	0.3		390	27329	3987	13.2	82	6.9
391	2549.8	10333	2.6	287	0.2		391	27364	3546	20	124	7.7
392	2550.2	9311	3.9	436	0.3		392	27379.6	2241	6.6	41	12.2
393	2550.6	8047	4.3	480	0.3		393	27400.9	3178	13.1	81	8.6
394	2551.7	9864	1.6	176	0.3		394	27454.9	3433	8	50	8
395	2552.2	11792	2.3	258	0.2		395	27490.5	2154	28.7	178	12.8
396	2552.6	12641	1.8	204	0.2		396	27529	3010	29.1	180	9.1
397	2555.1	18448	37.2	4148	0.1		397	27571.2	3916	11.7	73	7
398	2556.2	18071	59.9	6670	0.1		398	27613.2	3393	21.4	132	8.1
399	2556.7	13371	2.2	244	0.2		399	27630.2	6838	4.5	28	4
400	2557.2	17018	37.2	4144	0.2		400	27654.7	2378	21.2	131	11.6
401	2557.7	9065	0.2	17	0.3		401	27690.5	2756	5.9	36	10
402	2558.2	16800	25.5	2839	0.2		402	27729.1	2985	30.8	191	9.3
403	2559.2	12422	11.2	1242	0.2		403	27773.3	2754	17.7	110	10.1
404	2559.6	6079	2.8	317	0.4		404	27797.2	2727	2.2	14	10.2
405	2560.2	12624	8.7	964	0.2		405	27825.9	2411	1.7	11	11.5
406	2560.6	12732	5.2	577	0.2		406	27916.6	2921	3.5	22	9.6
407	2561	13498	4.3	474	0.2		407	27944.2	2719	7.7	48	10.3
408	2561.4	15898	4.2	470	0.2		408	27985.3	4261	5.9	36	6.6
409	2561.8	14131	4	446	0.2		409	28033.3	2808	6.3	39	10
410	2562.2	12812	0.9	98	0.2		410	28070.6	3282	2.5	15	8.6
411	2562.7	12141	3	329	0.2		411	28087.7	3853	71.6	443	7.3
412	2563.2	6008	2.5	273	0.4		412	28127.4	2326	24.1	149	12.1
413	2564.2	7834	1.9	210	0.3		413	28144.5	2686	9.4	58	10.5
414	2568.6	10454	2.4	267	0.2		414	28199.9	2688	6.6	41	10.5
415	2569.2	13491	5.6	621	0.2		415	28236.8	2220	2.1	13	12.7
416	2570.2	16890	6.2	689	0.2		416	28255.8	2786	4	25	10.1
417	2571.2	16279	7.9	881	0.2		417	28272.2	1811	2.4	15	15.6
418	2572.2	15425	3.9	438	0.2		418	28322.5	2157	3.4	21	13.1
419	2573.2	13427	0.3	36	0.2		419	28417.6	3048	41.1	254	9.3
420	2574.2	14552	0.1	12	0.2		420	28428.3	3253	17.8	110	8.7
421	2575.3	14663	0.5	60	0.2		421	28502.3	2551	3.4	21	11.2
422	2578.2	11814	3.4	377	0.2		422	28550.7	4295	6.7	42	6.6
423	2578.5	9220	1.7	184	0.3		423	28587.3	2555	5.3	33	11.2
424	2579.2	11999	2.3	253	0.2		424	28628	3428	5.1	31	8.4
425	2580.1	13212	3.6	400	0.2		425	28670.9	1976	8.6	53	14.5
426	2580.6	8126	0.7	80	0.3		426	28721.3	2951	9.5	59	9.7
427	2581.3	12943	2.2	241	0.2		427	28758.1	2658	2.2	14	10.8
428	2582.2	12184	2.7	303	0.2		428	28791.6	2780	5	31	10.4
429	2582.9	8650	2.5	274	0.3		429	28875.9	2740	8.6	53	10.5
430	2583.2	9858	3.4	378	0.3		430	28919.7	2865	3.2	20	10.1
431	2583.8	9850	1.9	215	0.3		431	28933.6	2297	3.2	20	12.6
432	2584.2	10856	3	338	0.2		432	28945.5	3085	7	43	9.4
433	2584.6	11268	3.8	428	0.2		433	28978.4	1992	4.2	26	14.5
434	2585	7484	3.1	344	0.3		434	28995.2	2770	8.1	50	10.5
435	2585.2	6804	3.8	423	0.4		435	29109.8	2241	5.7	35	13
436	2585.8	9440	2.7	299	0.3		436	29134.3	3700	9.5	59	7.9
437	2586.2	8341	2.5	274	0.3		437	29159.4	2766	2.3	15	10.5
438	2586.6	8086	2.2	241	0.3		438	29192.7	2749	11.4	71	10.6
439	2587.3	12208	3.2	356	0.2		439	29206.9	3179	5.7	35	9.2
440	2587.8	12397	1.2	136	0.2		440	29245.7	3599	1.7	10	8.1
441	2588.2	12748	2.4	263	0.2		441	29283.5	2016	13.3	82	14.5
442	2588.6	8800	1.8	204	0.3		442	29326	1872	8.8	55	15.7
443	2589.3	12262	2.5	284	0.2		443	29365.8	4011	11.6	72	7.3
444	2589.7	13446	1.9	215	0.2		444	29376.4	3127	3.8	23	9.4
445	2591.2	11984	0.1	13	0.2		445	29408.8	2066	13.5	84	14.2
446	2591.8	13665	0.7	81	0.2		446	29416.9	3122	11.4	71	9.4
447	2592.3	9379	0.4	41	0.3		447	29430.9	2651	7.9	49	11.1
448	2593.3	7971	1.3	144	0.3		448	29452	1454	1.8	11	20.2
449	2593.9	9093	2.4	271	0.3		449	29507.8	2928	49.8	308	10.1
450	2594.2	12703	2.8	314	0.2		450	29542.1	2217	3.5	22	13.3
451	2594.6	9669	1.6	173	0.3		451	29563.1	2575	3.4	21	11.5
452	2595.2	10552	1.3	146	0.2		452	29603.6	6280	51.1	316	4.7
453	2595.8	12789	0.3	37	0.2		453	29652.8	2167	3.8	23	13.7
454	2596.2	14606	2.5	282	0.2		454	29702.1	3061	11.2	70	9.7
455	2596.6	12343	2.3	255	0.2		455	29745.9	2494	2.2	14	11.9
456	2597.3	7960	2.6	293	0.3		456	29788.1	2671	123.4	763	11.2
457	2597.8	10831	5.5	618	0.2		457	29832.6	2469	17.6	109	12.1
458	2598.3	7308	5.5	609	0.4		458	29926.3	2715	90	557	11
459	2598.7	8529	3.9	440	0.3		459	29964.3	3620	1.9	11	8.3
460	2599.1	16257	20.7	2310	0.2		460	30030.5	3226	7.3	45	9.3
461	2599.8	12770	3.2	358	0.2		461	30040.9	3656	3.8	23	8.2
462	2600.2	13870	3.6	403	0.2		462	30075.4	2153	15.3	95	14
463	2600.6	16617	5.1	571	0.2		463	30090.4	2958	17.6	109	10.2
464	2601.7	14399	0.2	23	0.2		464	30114.5	3465	5.3	33	8.7
465	2602.1	15754	0.5	60	0.2		465	30121	2483	5.2	32	12.1
466	2602.8	11230	0.7	77	0.2		466	30142.5	2679	22.9	142	11.3
467	2603.3	13800	0.6	62	0.2		467	30169.3	2935	8	49	10.3
468	2603.6	15417	1.8	202	0.2		468	30205.7	3520	1.8	11	8.6
469	2604.3	11693	0.4	41	0.2		469	30215.2	4267	3.8	24	7.1
470	2605.3	9968	2.5	283	0.3		470	30249.7	2653	13.9	86	11.4
471	2606.2	8839	1.7	189	0.3		471	30295	3798	2	12	8
472	2607.1	8026	2.2	242	0.3		472	30325.8	3169	5	31	9.6
473	2607.8	10919	1.2	139	0.2		473	30366	2583	1.6	10	11.8
474	2608.1	11998	2.3	258	0.2		474	30380.8	3237	6.3	39	9.4
475	2609	6325	3.5	387	0.4		475	30420.3	3049	3.8	24	10
476	2609.3	6715	3.8	422	0.4		476	30460	2647	2.6	16	11.5
477	2609.7	10678	4	448	0.2		477	30467.8	2111	2.4	15	14.4
478	2610.1	12193	2.7	300	0.2		478	30514.2	3023	4.5	28	10.1
479	2610.5	14324	2.5	275	0.2		479	30520.9	2438	4.4	27	12.5
480	2610.9	11292	1.3	144	0.2		480	30555.1	3372	10.9	67	9.1
481	2611.3	12431	3.6	397	0.2		481	30601	5285	2.9	18	5.8
482	2611.8	11118	2.6	292	0.2		482	30613.9	2246	7.9	49	13.6
483	2612.2	6596	3.8	423	0.4		483	30637.1	3779	5.5	34	8.1
484	2612.8	8588	1.8	202	0.3		484	30657.2	2425	3.9	24	12.6
485	2614.3	7910	2.9	322	0.3		485	30743.2	2754	17	105	11.2
486	2615.2	6988	6.6	737	0.4		486	30762.2	3409	3.1	19	9
487	2616	8720	9.2	1027	0.3		487	30782.9	3632	7	43	8.5
488	2618	69814	260.4	29005	0		488	30808.4	2358	3.5	21	13.1
489	2620.9	4659	22	2455	0.6		489	30853.7	2336	9.4	58	13.2
490	2621.7	4001	17.7	1968	0.7		490	30867.2	3181	10.5	65	9.7
491	2622.1	8029	15.1	1680	0.3		491	30886	2012	5.8	36	15.4
492	2622.9	4267	7.2	802	0.6		492	30914.6	3888	4.2	26	8
493	2623.1	6830	8	896	0.4		493	30950.8	3174	4.1	25	9.8
494	2623.9	6601	7	774	0.4		494	30997.9	2758	8.4	52	11.2
495	2624.5	10666	4.7	527	0.2		495	31007.3	2713	8.9	55	11.4
496	2625	7136	5.2	574	0.4		496	31053.8	3429	11.7	72	9.1
497	2626.3	4888	14.7	1642	0.5		497	31100.3	3224	66.6	412	9.6
498	2629.2	7315	0.5	60	0.4		498	31146.2	3657	48.3	299	8.5
499	2629.4	8690	0.7	76	0.3		499	31205.5	3813	5.6	35	8.2
500	2631.9	14129	7.9	880	0.2		500	31238.1	2585	179.2	1109	12.1
501	2632.8	14250	8.9	996	0.2		501	31275.6	2638	44.5	275	11.9
502	2633.7	11609	3.8	427	0.2		502	31410.6	2498	140.4	869	12.6
503	2634.6	8439	3	331	0.3		503	31425	3175	91.2	564	9.9
504	2635.3	5792	1	114	0.5		504	31459.3	2702	9.2	57	11.6
505	2636.2	13118	0.3	37	0.2		505	31576.7	3642	32	198	8.7
506	2637.4	4941	5.6	629	0.5		506	31588.4	3999	93.8	581	7.9
507	2638.2	11486	10.9	1218	0.2		507	31609.8	3703	34	210	8.5
508	2638.8	9345	0.6	66	0.3		508	31619.4	2388	54.2	336	13.2
509	2639.7	17216	0.2	23	0.2		509	31643	2657	2.2	14	11.9
510	2641.3	15711	12.2	1355	0.2		510	31665.2	3290	7.5	46	9.6
511	2641.9	16637	19	2122	0.2		511	31716.5	3155	14.1	87	10.1
512	2642.5	16410	20.9	2331	0.2		512	31726.3	4251	24.5	151	7.5
513	2643.1	16080	12.9	1435	0.2		513	31766.8	2456	331.5	2051	12.9
514	2643.7	16302	9.1	1016	0.2		514	31811.3	4124	8.4	52	7.7
515	2644.3	12834	7	779	0.2		515	31860	3775	6.4	40	8.4
516	2644.9	13342	1.3	146	0.2		516	31881.8	2400	2.1	13	13.3
517	2645.3	9007	1.7	191	0.3		517	31913.9	2700	11.4	70	11.8
518	2646.2	7399	4.2	470	0.4		518	31942.8	2716	4.2	26	11.8
519	2646.8	8100	2.7	306	0.3		519	31961.7	3380	36.8	228	9.5
520	2647.3	12867	4.6	508	0.2		520	31995.4	2165	1.9	12	14.8
521	2647.7	13384	0.8	92	0.2		521	32078.5	2443	1.7	11	13.1
522	2648.2	13917	1.7	189	0.2		522	32101.8	3648	42.7	264	8.8
523	2648.7	7585	2.8	316	0.3		523	32127.3	3589	2.7	17	9
524	2649.3	13714	3.7	412	0.2		524	32163.5	2532	1.7	11	12.7
525	2649.8	14869	1.4	152	0.2		525	32177.5	3514	3.6	22	9.2
526	2650.4	12600	0.2	27	0.2		526	32276.2	2994	3.3	21	10.8
527	2650.8	12696	1.2	132	0.2		527	32293.6	1932	11.9	74	16.7
528	2651.6	6837	1.8	200	0.4		528	32350.3	2450	11.9	73	13.2
529	2652.1	9774	4.1	458	0.3		529	32358.4	3417	10.8	67	9.5
530	2653.4	6085	47	5236	0.4		530	32396.5	3879	14.4	89	8.4
531	2653.8	4589	53.3	5938	0.6		531	32424.2	2669	9.1	56	12.1
532	2656.3	13835	11.7	1307	0.2		532	32444.7	3096	11.3	70	10.5
533	2656.6	9522	5.1	565	0.3		533	32473.9	3047	9	56	10.7
534	2657	5288	5.4	599	0.5		534	32491.2	3045	18.6	115	10.7
535	2657.5	5353	3.8	421	0.5		535	32508.5	2231	11.1	69	14.6
536	2657.6	70870	3.8	423	0		536	32540.3	2185	33.2	206	14.9
537	2658.1	8129	2.6	291	0.3		537	32553.1	2618	40.2	249	12.4
538	2658.7	9333	1.7	185	0.3		538	32563.2	4464	66.2	410	7.3
539	2659.3	12581	2.9	322	0.2		539	32575.2	4497	76	470	7.2
540	2660.2	11104	0.8	93	0.2		540	32585.1	2780	55.3	342	11.7
541	2661.3	12387	2.4	273	0.2		541	32626.9	3501	20.9	129	9.3
542	2662.2	7438	4.1	458	0.4		542	32734.6	3168	20.4	126	10.3
543	2662.7	8064	3.9	433	0.3		543	32775.8	3997	12.4	77	8.2
544	2663.3	13481	5.8	647	0.2		544	32838.2	1995	1.8	11	16.5
545	2663.7	16298	8	896	0.2		545	32987	3100	30.8	191	10.6
546	2665.3	9995	35.3	3929	0.3		546	33037.1	3432	4.5	28	9.6
547	2666	5078	45.2	5037	0.5		547	33047.9	3487	3.6	22	9.5
548	2666.7	7022	46	5123	0.4		548	33086.3	3470	4.2	26	9.5
549	2667.7	6229	5.2	583	0.4		549	33148.8	3570	21.5	133	9.3
550	2668.2	9160	7.5	839	0.3		550	33189.4	2906	19.6	121	11.4
551	2669.7	4450	33.4	3716	0.6		551	33240.7	3082	9.4	58	10.8
552	2671.2	7363	5.5	616	0.4		552	33322.6	3010	48613.5	300839	11.1
553	2671.8	6550	3.5	394	0.4		553	33376.7	2135	7.2	44	15.6
554	2672.3	5650	4.8	538	0.5		554	33392.5	3307	12.7	79	10.1
555	2672.8	3994	4.9	547	0.7		555	33426.5	2650	8.9	55	12.6
556	2673.3	5467	5.7	631	0.5		556	33442.8	3369	37.1	230	9.9
557	2673.8	7519	7.4	827	0.4		557	33488.4	2494	2.6	16	13.4
558	2674.4	7132	8.6	957	0.4		558	33525.5	3333	6.3	39	10.1
559	2674.7	7133	8.5	952	0.4		559	33538.7	3670	4.3	27	9.1
560	2675.2	5945	9	1001	0.4		560	33561.5	6332	3	19	5.3
561	2677.3	7191	4.3	484	0.4		561	33587.7	2618	9.3	58	12.8
562	2677.9	6931	3.3	373	0.4		562	33599.8	2648	8.4	52	12.7
563	2678.5	8134	2.7	296	0.3		563	33638.7	2916	2.8	17	11.5
564	2679	10465	2.2	243	0.3		564	33738.4	3776	13.1	81	8.9
565	2679.2	12490	3.6	404	0.2		565	33786	3347	2.5	16	10.1
566	2680.1	7226	3.8	425	0.4		566	33892	2769	9	56	12.2
567	2682.1	7947	68.4	7621	0.3		567	33938.8	2547	7.8	48	13.3
568	2683.8	7465	5.7	632	0.4		568	34045	3971	65.4	405	8.6
569	2684.3	8750	7.1	791	0.3		569	34099.2	2963	62.4	386	11.5
570	2684.7	4130	6.5	723	0.7		570	34111.6	3201	26.1	162	10.7
571	2685.3	8954	12.1	1352	0.3		571	34155	2496	252.1	1560	13.7
572	2685.7	4782	6	672	0.6		572	34203.5	4453	49.6	307	7.7
573	2686.2	10389	6.9	767	0.3		573	34251.1	2427	31.5	195	14.1
574	2686.5	11302	4.7	520	0.2		574	34312.5	2330	5.7	35	14.7
575	2686.9	8604	2	228	0.3		575	34333	2303	2.3	14	14.9
576	2687.3	12239	4.2	464	0.2		576	34361.3	2915	35.8	222	11.8
577	2687.8	9127	2.7	302	0.3		577	34403.3	2030	3.4	21	16.9
578	2688.4	8104	2.3	252	0.3		578	34524.2	4366	4	25	7.9
579	2688.8	6862	2.6	291	0.4		579	34549.4	5230	3.1	19	6.6
580	2689.3	9805	5.2	574	0.3		580	34558.7	2524	1.9	12	13.7
581	2689.8	6002	3.2	361	0.4		581	34587.1	2956	7.1	44	11.7
582	2690.2	6321	3.7	409	0.4		582	34598.1	4459	4.9	31	7.8
583	2690.6	7501	4	444	0.4		583	34614	3758	9.8	61	9.2
584	2691.3	5953	2.7	303	0.5		584	34636.7	3041	23.9	148	11.4
585	2691.7	8903	3.1	340	0.3		585	34653.6	3978	649.5	4019	8.7
586	2692.3	7042	2.9	327	0.4		586	34771.1	3560	2.7	17	9.8
587	2692.9	7203	3.7	414	0.4		587	34887	3275	9.3	57	10.7
588	2693.3	8997	4.7	522	0.3		588	34925.5	2740	5.9	37	12.7
589	2693.7	7330	4.3	479	0.4		589	34940.2	1955	6.6	41	17.9
590	2694.4	6502	3.4	375	0.4		590	34950.7	3221	5.8	36	10.9
591	2695.3	10738	3.9	435	0.3		591	34967	3592	1.8	11	9.7
592	2695.8	9676	3.8	425	0.3		592	35039.6	2338	1.9	12	15
593	2696.6	5992	2.5	278	0.4		593	35182	3240	6.5	40	10.9
594	2697.8	7194	15.1	1682	0.4		594	35191.3	3937	5.7	35	8.9
595	2698.2	6387	24.6	2743	0.4		595	35199.1	2830	6.5	40	12.4
596	2698.7	5056	12	1341	0.5		596	35238.6	4803	34.7	214	7.3
597	2699.2	7090	6.2	685	0.4		597	35250.5	4796	8	50	7.3
598	2699.7	8510	4	446	0.3		598	35299.1	2709	58.3	361	13
599	2701.3	4563	10.2	1133	0.6		599	35345.4	5225	18.9	117	6.8
600	2701.9	5210	9.3	1037	0.5		600	35394.6	4238	16.4	102	8.4
601	2703.2	5604	3.4	378	0.5		601	35453	2662	8.3	51	13.3
602	2704.3	4911	3.1	350	0.6		602	35481.9	2672	1.8	11	13.3
603	2704.9	6011	5.4	601	0.4		603	35503.4	3978	3.3	21	8.9
604	2705.4	6558	4.7	518	0.4		604	35513.7	3631	7.2	44	9.8
605	2705.7	7357	5	555	0.4		605	35546	2555	5.1	32	13.9
606	2706	6859	5	555	0.4		606	35575.9	2023	13.5	84	17.6
607	2706.4	8812	4.1	455	0.3		607	35593.8	2418	13.8	85	14.7
608	2706.8	10011	3.1	341	0.3		608	35616.2	2433	6.5	40	14.6
609	2707.3	9021	2.9	328	0.3		609	35663.9	3228	24.1	149	11
610	2707.7	9496	1.8	198	0.3		610	35676.8	3089	13.1	81	11.5
611	2708.2	10759	2.7	302	0.3		611	35703.5	3681	2.9	18	9.7
612	2708.7	5995	2.6	288	0.5		612	35753.8	2804	3.6	22	12.7
613	2709.2	7225	2.7	301	0.4		613	35839.3	3713	6.4	40	9.7
614	2709.6	7212	3	331	0.4		614	35888.4	2255	24.4	151	15.9
615	2710	6630	3.3	370	0.4		615	35908.9	3157	6.9	43	11.4
616	2710.4	7211	2.6	289	0.4		616	35917.7	3267	12.5	78	11
617	2710.9	6197	2.2	243	0.4		617	35948	3580	4.7	29	10
618	2711.2	8980	1.9	211	0.3		618	35956.8	3305	6.6	41	10.9
619	2711.7	10122	1.5	170	0.3		619	35998.8	2066	6.5	40	17.4
620	2712.1	9586	2.3	256	0.3		620	36009.3	2841	6.8	42	12.7
621	2713.9	8041	6.9	772	0.3		621	36058.6	2741	2	12	13.2
622	2714.4	6264	6.6	736	0.4		622	36097.4	3076	2	12	11.7
623	2714.9	6140	4.1	458	0.4		623	36110.9	2556	2.6	16	14.1
624	2715.3	9613	3.3	366	0.3		624	36134.8	3374	5	31	10.7
625	2715.8	8594	2.7	300	0.3		625	36145.8	4044	2.1	13	8.9
626	2717.6	4207	8.3	929	0.6		626	36168.4	2935	2192.9	13571	12.3
627	2718.4	4199	6.9	771	0.6		627	36203.3	2228	42.3	261	16.3
628	2719.3	5536	4.7	528	0.5		628	36217.3	2969	55.8	345	12.2
629	2719.8	7150	3	337	0.4		629	36260.5	2647	1.8	11	13.7
630	2720.2	10046	2.4	268	0.3		630	36276.5	3184	4.6	28	11.4
631	2720.6	10256	3.7	412	0.3		631	36286.9	3413	6.6	41	10.6
632	2721.2	8028	5.7	633	0.3		632	36300.1	2712	2.4	15	13.4
633	2721.8	7937	4.3	477	0.3		633	36313.3	2452	2.2	13	14.8
634	2722.3	9446	6.2	691	0.3		634	36328.5	2593	3.7	23	14
635	2722.8	5671	2.4	268	0.5		635	36341.1	2281	2.1	13	15.9
636	2723.3	9153	2.2	241	0.3		636	36374.3	3029	2.3	14	12
637	2724	7811	1.6	181	0.3		637	36411.2	5504	212.6	1316	6.6
638	2724.5	12410	2.2	240	0.2		638	36440.3	3421	2.2	14	10.7
639	2724.9	12968	2.9	318	0.2		639	36448.1	2659	2	12	13.7
640	2725.3	12079	3.2	358	0.2		640	36481.8	2763	4.1	25	13.2
641	2725.7	11318	2.1	235	0.2		641	36507.4	5362	3.5	22	6.8
642	2726.2	7382	2.3	255	0.4		642	36535.3	4786	2	12	7.6
643	2726.4	6059	2.5	283	0.4		643	36563.7	2993	4.8	30	12.2
644	2726.8	9393	3.2	361	0.3		644	36655.1	2349	26.5	164	15.6
645	2727.2	7587	3.5	392	0.4		645	36733.4	3943	8.2	51	9.3
646	2727.8	6163	3.7	414	0.4		646	36788.6	3422	3.6	22	10.7
647	2728.3	4834	3.7	417	0.6		647	36843.3	3300	2.2	14	11.2
648	2729.9	8089	17.8	1986	0.3		648	36886.1	3015	8.4	52	12.2
649	2731.3	7025	6	671	0.4		649	36924.2	2551	5	31	14.5
650	2731.8	3839	3	338	0.7		650	36951.5	2778	22.8	141	13.3
651	2732.7	6761	5.3	587	0.4		651	36971.8	4250	6.1	38	8.7
652	2733.3	6716	8.3	925	0.4		652	37000.1	3053	3.9	24	12.1
653	2733.8	7290	8.2	915	0.4		653	37015.6	2737	2	13	13.5
654	2734.2	7306	7.7	857	0.4		654	37027.3	2400	2.8	17	15.4
655	2735.3	7883	3.4	383	0.3		655	37052.9	3046	7.6	47	12.2
656	2735.9	6943	2.5	279	0.4		656	37067.9	2535	6.5	40	14.6
657	2736.4	6933	3.1	343	0.4		657	37112.9	3558	21.1	130	10.4
658	2736.8	4869	2.2	248	0.6		658	37141.5	2205	2	12	16.8
659	2737.3	8482	3.6	404	0.3		659	37168.4	3354	23.5	146	11.1
660	2737.9	7337	3	337	0.4		660	37194.5	2615	9.6	59	14.2
661	2738.2	6638	2.8	315	0.4		661	37256.1	2829	22.7	141	13.2
662	2738.6	5285	3.3	364	0.5		662	37286.1	2322	11.3	70	16.1
663	2738.9	6651	3.1	348	0.4		663	37311.6	3667	48.1	298	10.2
664	2739.2	7465	2.5	283	0.4		664	37383.6	3428	9.8	60	10.9
665	2739.9	11223	2.5	276	0.2		665	37398.6	3288	4	25	11.4
666	2740.2	7939	1.7	191	0.3		666	37420.5	3464	63.4	393	10.8
667	2740.8	4472	2.2	247	0.6		667	37446.6	2842	96.4	596	13.2
668	2741.3	12019	4.3	474	0.2		668	37466.8	3234	22.8	141	11.6
669	2741.8	9536	2.5	278	0.3		669	37483.2	3625	7.4	46	10.3
670	2742.3	7774	2.4	273	0.4		670	37497.7	5711	2.4	15	6.6
671	2742.8	8091	1.4	160	0.3		671	37510.9	6618	3.8	24	5.7
672	2743.3	11825	2.2	249	0.2		672	37538.3	2334	13.5	83	16.1
673	2744	73174	1.5	168	0		673	37551.8	3258	10.4	64	11.5
674	2744.4	6448	2.2	242	0.4		674	37590.1	2892	2.8	17	13
675	2744.9	5515	2.6	286	0.5		675	37604.4	3873	1.6	10	9.7
676	2745.3	9501	4	442	0.3		676	37646.2	3670	7.8	49	10.3
677	2746.2	4744	3.7	413	0.6		677	37672.1	3465	8.4	52	10.9
678	2746.7	5744	3.7	414	0.5		678	37703.7	2638	18	111	14.3
679	2747.3	11122	3.5	394	0.2		679	37760.8	3636	15.6	97	10.4
680	2747.7	10027	2.3	253	0.3		680	37782.4	3599	3.7	23	10.5
681	2748.2	7823	1.9	206	0.4		681	37813.2	2719	42.7	265	13.9
682	2748.8	8040	3	337	0.3		682	37870.5	4088	15.9	99	9.3
683	2749.3	16224	17.5	1951	0.2		683	37931.2	3322	2.6	16	11.4
684	2749.8	7091	3.9	438	0.4		684	37962.4	2920	10.2	63	13
685	2750.7	16965	10.6	1180	0.2		685	37971.7	2244	9.7	60	16.9
686	2751.3	10477	1.8	199	0.3		686	37997.5	2726	10.3	64	13.9
687	2751.8	11268	1.9	213	0.2		687	38017.4	3455	6.7	42	11
688	2752.3	16480	5.5	613	0.2		688	38066.7	2204	8.3	51	17.3
689	2752.7	5976	1.1	117	0.5		689	38086.2	2861	2.3	14	13.3
690	2753.3	8236	2.3	260	0.3		690	38179.2	4579	138.2	855	8.3
691	2753.7	11920	4.2	468	0.2		691	38221.7	4335	18.9	117	8.8
692	2754.1	13280	3.4	378	0.2		692	38239.1	4293	12.2	76	8.9
693	2754.6	8734	3.4	383	0.3		693	38293.9	3241	17.7	110	11.8
694	2755.3	8580	3.4	375	0.3		694	38304.4	2810	15.3	95	13.6
695	2755.7	6835	1.9	207	0.4		695	38318.3	3353	5.8	36	11.4
696	2756.3	4542	1.6	174	0.6		696	38360.1	4066	8	49	9.4
697	2756.8	10970	2.8	313	0.3		697	38402.4	3252	2.3	14	11.8
698	2757.3	14389	8.1	904	0.2		698	38416	4728	1.8	11	8.1
699	2757.8	13599	11.4	1268	0.2		699	38437.9	4153	52.6	325	9.3
700	2758.3	12709	14.4	1606	0.2		700	38458.1	2098	4.2	26	18.3
701	2758.8	13671	14.1	1568	0.2		701	38483.7	6149	11.9	74	6.3
702	2759.3	12822	10.9	1212	0.2		702	38497	6552	9.6	60	5.9
703	2759.8	13688	8.5	941	0.2		703	38510.5	2784	2.1	13	13.8
704	2760.3	9904	4.8	540	0.3		704	38524.8	2418	1.7	11	15.9
705	2760.8	10483	3.7	408	0.3		705	38556.9	4820	12.5	77	8
706	2761.3	8029	3.7	417	0.3		706	38572.4	2741	3	18	14.1
707	2761.8	5086	2.9	321	0.5		707	38595.5	2898	11.1	69	13.3
708	2762.4	8608	3.6	406	0.3		708	38655.7	3009	7.2	44	12.8
709	2763	19298	61.4	6845	0.1		709	38682.3	4801	6.9	43	8.1
710	2763.6	9625	3.7	414	0.3		710	38718.7	2853	24.9	154	13.6
711	2763.9	8189	2.8	314	0.3		711	38747.8	2854	3.2	20	13.6
712	2764.4	5659	3.2	354	0.5		712	38760.4	2982	4.3	27	13
713	2764.8	8446	2.8	315	0.3		713	38773.9	2700	6.5	40	14.4
714	2765.3	7766	3.8	418	0.4		714	38816.2	3341	1.7	10	11.6
715	2766	17056	28.8	3209	0.2		715	38833.3	5152	17.7	109	7.5
716	2766.8	8306	4.6	511	0.3		716	38861	3351	1.7	11	11.6
717	2767.3	9578	4.3	474	0.3		717	38889.9	3039	19.5	121	12.8
718	2767.9	5875	2.6	289	0.5		718	38909	2572	3.7	23	15.1
719	2768.2	10073	3	331	0.3		719	39012.5	2888	40.6	251	13.5
720	2768.7	13545	6.2	689	0.2		720	39025.5	2706	51.4	318	14.4
721	2769	13554	5.7	634	0.2		721	39046.4	4005	13.1	81	9.8
722	2769.3	11589	3.9	433	0.2		722	39067.8	1904	79.5	492	20.5
723	2769.8	9630	3.5	385	0.3		723	39113.5	4012	2.7	17	9.8
724	2770.2	16063	7.3	812	0.2		724	39124.2	4071	2.4	15	9.6
725	2770.6	15134	2.3	252	0.2		725	39248.1	2722	80.8	500	14.4
726	2770.9	13024	2.8	316	0.2		726	39270.8	2284	157.2	973	17.2
727	2771.3	12846	3.2	361	0.2		727	39299.8	2534	98.3	608	15.5
728	2771.7	12444	4.3	477	0.2		728	39318.3	3482	29.9	185	11.3
729	2772.4	12934	2.4	272	0.2		729	39358.3	6170	5.2	32	6.4
730	2773.2	10443	4	448	0.3		730	39418.7	3523	1.7	10	11.2
731	2773.9	7429	2.7	304	0.4		731	39460.6	3254	69.4	429	12.1
732	2774.3	9215	3.8	423	0.3		732	39469.9	4473	76.8	475	8.8
733	2774.8	6369	3.1	349	0.4		733	39485.8	4449	77.8	481	8.9
734	2775.3	10566	2.9	326	0.3		734	39497.3	2131	79.2	490	18.5
735	2775.7	9755	2.5	273	0.3		735	39519.7	2702	61.8	382	14.6
736	2776	9120	3.1	344	0.3		736	39580.5	4258	2.7	17	9.3
737	2776.4	6754	2.7	297	0.4		737	39602.1	6667	2.4	15	5.9
738	2776.8	5090	1.9	217	0.5		738	39645.4	3971	27.3	169	10
739	2777.3	6374	3	333	0.4		739	39657	3266	26.4	164	12.1
740	2777.8	6481	3.3	366	0.4		740	39708.1	3028	64.5	399	13.1
741	2778.6	8393	3.6	406	0.3		741	39765	3593	8.2	51	11.1
742	2779.3	8904	3.8	424	0.3		742	39778.1	2880	7.3	45	13.8
743	2779.8	7937	2.4	264	0.4		743	39802	1609	8.6	53	24.7
744	2780.3	12205	2.5	274	0.2		744	39826.7	4007	145.8	902	9.9
745	2780.7	6741	1.5	167	0.4		745	39880.2	2362	4.3	27	16.9
746	2781.3	8065	2.1	239	0.3		746	39904.7	3492	9.2	57	11.4
747	2782.3	10336	6.9	766	0.3		747	39950.3	3891	14.4	89	10.3
748	2782.7	9650	6.4	708	0.3		748	39964.2	2893	3.6	22	13.8
749	2783.2	9921	6.7	742	0.3		749	39980.3	3388	6.3	39	11.8
750	2783.7	10590	7.3	816	0.3		750	40008.5	2892	15.6	97	13.8
751	2784.1	6458	3.9	434	0.4		751	40059.3	4154	15.6	97	9.6
752	2785.3	10596	3.7	410	0.3		752	40128.5	4114	2566	15879	9.8
753	2785.8	9225	2.5	277	0.3		753	40150.6	3197	42.1	260	12.6
754	2786.2	6754	1.9	211	0.4		754	40188.8	3474	8.4	52	11.6
755	2786.7	5505	2.2	247	0.5		755	40235.7	3427	2.2	13	11.7
756	2787.3	7569	2.5	277	0.4		756	40303.7	2405	8.2	51	16.8
757	2787.8	4881	2	220	0.6		757	40365.2	2362	48.1	298	17.1
758	2788.3	9190	3.3	372	0.3		758	40432.3	3975	34.8	215	10.2
759	2788.9	8014	2.1	233	0.3		759	40473.1	4808	18.8	117	8.4
760	2789.2	7588	2.5	280	0.4		760	40485.3	3448	14.7	91	11.7
761	2789.7	4979	1.9	213	0.6		761	40545.6	2887	9.6	60	14
762	2790.2	6962	2.4	269	0.4		762	40614	2788	8.7	54	14.6
763	2790.7	6201	1.9	207	0.4		763	40646.7	2075	5.1	32	19.6
764	2791.3	9146	2.3	251	0.3		764	40658.7	2917	4.9	30	13.9
765	2791.8	8871	1.9	216	0.3		765	40691.7	3080	2.3	14	13.2
766	2792.3	11556	1.9	209	0.2		766	40726.9	2646	26.6	165	15.4
767	2792.7	9625	2.2	248	0.3		767	40738.6	3142	17.7	110	13
768	2793.3	8112	3.7	408	0.3		768	40785.9	3137	2.5	16	13
769	2793.9	7450	3	335	0.4		769	40799.1	4483	3.7	23	9.1
770	2794.2	6905	3	339	0.4		770	40822.8	2504	3.5	22	16.3
771	2794.8	6279	2.6	288	0.4		771	40828.7	4568	3.2	20	8.9
772	2795.3	9953	3.9	434	0.3		772	40845.7	2443	7.8	48	16.7
773	2795.9	5674	2.1	239	0.5		773	40860.3	2647	4.9	31	15.4
774	2796.4	6353	2.1	236	0.4		774	40882.2	2539	22	136	16.1
775	2797.3	7915	2.7	302	0.4		775	40897	3190	12.9	80	12.8
776	2798.1	6030	2.7	300	0.5		776	40923.7	3358	16.8	104	12.2
777	2798.5	8746	4.1	462	0.3		777	40960.7	2490	15.1	94	16.5
778	2799.1	5989	4.6	514	0.5		778	40990.6	3143	12.4	77	13
779	2800	5651	2.3	259	0.5		779	41008.7	2373	7.1	44	17.3
780	2800.5	8248	3	338	0.3		780	41048.9	3187	18.1	112	12.9
781	2800.9	7496	3.5	395	0.4		781	41066.7	2876	8	49	14.3
782	2801.3	8893	6.4	714	0.3		782	41096.2	2270	7.3	45	18.1
783	2801.8	10962	4.6	509	0.3		783	41132.5	3051	2.2	14	13.5
784	2802.2	6802	3.2	358	0.4		784	41154.2	3017	11.3	70	13.6
785	2802.9	8115	3.5	385	0.3		785	41195.7	4299	23.2	144	9.6
786	2803.3	8309	5.8	647	0.3		786	41233.7	3667	9.9	61	11.2
787	2804.8	6608	125.4	13973	0.4		787	41258.6	3314	2.2	13	12.5
788	2805.1	5391	124.9	13915	0.5		788	41294.2	4362	12.7	79	9.5
789	2807.4	7599	4.9	550	0.4		789	41311.4	3413	1.7	11	12.1
790	2807.7	6663	7	774	0.4		790	41354.9	3780	14	87	10.9
791	2808.4	7015	8.1	900	0.4		791	41402.8	2753	5.7	35	15
792	2808.7	7315	6.6	737	0.4		792	41428.7	5115	33.8	209	8.1
793	2809.4	5767	6.4	718	0.5		793	41445.3	7937	14.5	90	5.2
794	2810.3	9609	3.7	414	0.3		794	41460.2	4865	34.2	211	8.5
795	2810.7	13369	4.5	504	0.2		795	41469.7	3193	31.1	192	13
796	2811.2	11023	5.5	608	0.3		796	41488	4708	33.9	210	8.8
797	2811.6	9699	2.7	303	0.3		797	41542.6	4468	6.6	41	9.3
798	2812.4	8291	3.4	380	0.3		798	41607.9	3509	57.5	356	11.9
799	2813.4	5359	4.6	510	0.5		799	41653.6	3524	46.8	290	11.8
800	2814	4800	5.2	583	0.6		800	41680.3	3018	18.1	112	13.8
801	2814.8	4633	4.4	487	0.6		801	41699.5	4544	883.5	5467	9.2
802	2815.3	7559	4.9	546	0.4		802	41739	2160	26.1	161	19.3
803	2815.8	6826	2.6	285	0.4		803	41881.1	5103	238.1	1474	8.2
804	2816.2	5455	3.4	377	0.5		804	41903.6	4913	84.4	522	8.5
805	2816.8	6378	3.6	403	0.4		805	41953.1	2269	2.3	14	18.5
806	2817.2	8181	4.2	468	0.3		806	42047.1	3869	16.6	103	10.9
807	2817.8	7704	2.8	307	0.4		807	42092.6	3369	3.6	22	12.5
808	2818.1	6262	2.5	278	0.4		808	42106.2	2792	4.9	31	15.1
809	2818.8	5216	2.8	314	0.5		809	42122.8	3240	1.8	11	13
810	2819.4	4808	2.5	282	0.6		810	42156.3	2642	1.9	12	16
811	2819.9	6077	3	333	0.5		811	42216.5	2033	26.1	162	20.8
812	2820.6	7612	3.3	365	0.4		812	42236.9	3003	20.8	128	14.1
813	2821.4	7252	1.9	208	0.4		813	42276.3	5203	3.4	21	8.1
814	2821.7	7131	2.6	285	0.4		814	42286.1	2771	4.6	28	15.3
815	2822.5	4226	1.7	188	0.7		815	42300.5	3233	4.6	29	13.1
816	2822.8	8750	1.5	171	0.3		816	42346.8	4067	249.2	1542	10.4
817	2823.3	12383	2.5	279	0.2		817	42365.5	4297	102.4	634	9.9
818	2823.6	7575	1.4	151	0.4		818	42414.6	2996	7.1	44	14.2
819	2824.3	13533	2.4	264	0.2		819	42446.4	6948	2	12	6.1
820	2824.8	12163	1.7	186	0.2		820	42479	2354	11.5	71	18
821	2825.3	8427	3.1	345	0.3		821	42494	3722	13	81	11.4
822	2825.8	6850	2	225	0.4		822	42511.4	4244	6.4	40	10
823	2826.5	5004	3.6	403	0.6		823	42555.9	3525	17	106	12.1
824	2827.3	8349	4.2	466	0.3		824	42621.7	4928	4825.2	29860	8.6
825	2828.1	8282	3.2	357	0.3		825	42690.7	2757	3.5	22	15.5
826	2828.5	10690	4.3	482	0.3		826	42718.7	3645	10.4	64	11.7
827	2829	16400	16.6	1853	0.2		827	42738.5	2418	5.6	35	17.7
828	2829.4	14186	4.1	455	0.2		828	42752.2	2811	8.3	51	15.2
829	2830	7156	3.2	359	0.4		829	42786.5	4431	15.3	94	9.7
830	2830.4	8717	2.6	285	0.3		830	42819.8	3147	6.6	41	13.6
831	2830.9	7099	3.4	374	0.4		831	42833.2	2805	5	31	15.3
832	2831.3	15245	10.9	1217	0.2		832	42856.2	3322	10.7	66	12.9
833	2831.9	16896	8.5	943	0.2		833	42898.2	3315	5.3	33	12.9
834	2832.3	17339	12.4	1379	0.2		834	42914.8	2401	1.9	12	17.9
835	2832.8	6570	2.1	237	0.4		835	42950.9	2917	14.8	92	14.7
836	2833.3	17353	9.1	1016	0.2		836	43006.4	2301	4.1	26	18.7
837	2833.8	8391	1.9	214	0.3		837	43030	3155	1.9	12	13.6
838	2834.3	12987	3.2	356	0.2		838	43055.3	3002	18.7	116	14.3
839	2834.9	6872	1.9	209	0.4		839	43076.8	53018	16.8	104	0.8
840	2835.3	11243	3	332	0.3		840	43116.5	5740	5	31	7.5
841	2835.7	6875	1.4	156	0.4		841	43119.6	4825	5	31	8.9
842	2836.2	5375	1.8	203	0.5		842	43135.3	4472	11.8	73	9.6
843	2836.5	7564	1.4	154	0.4		843	43143.3	3323	11.4	71	13
844	2836.9	8462	2	224	0.3		844	43193.6	2939	23.2	144	14.7
845	2837.3	10711	3.8	421	0.3		845	43212.8	2335	7.7	48	18.5
846	2837.8	7679	2.8	314	0.4		846	43232.5	2136	6.5	40	20.2
847	2838.6	3984	2.3	253	0.7		847	43249.9	3131	3.5	22	13.8
848	2839.4	9276	2.9	325	0.3		848	43264.7	3917	8.9	55	11
849	2839.9	8644	2.3	253	0.3		849	43285.9	3256	2.4	15	13.3
850	2840.4	11876	2.1	232	0.2		850	43297.9	4084	2.6	16	10.6
851	2840.8	8356	1.8	203	0.3		851	43314.8	3417	9.2	57	12.7
852	2841.4	10878	2	220	0.3		852	43323.3	2540	8.6	53	17.1
853	2841.8	8097	2.4	273	0.4		853	43346.6	4346	14.4	89	10
854	2842.8	5100	11.1	1239	0.6		854	43403.9	3436	53.3	330	12.6
855	2843.2	4868	13.9	1552	0.6		855	43416.9	5240	28.6	177	8.3
856	2843.9	6926	9.7	1082	0.4		856	43432.4	4664	5.2	32	9.3
857	2844.4	6359	5.8	643	0.4		857	43461.7	3812	34.6	214	11.4
858	2845	8429	3.7	415	0.3		858	43480.4	3200	17.1	106	13.6
859	2845.2	8185	3.7	410	0.3		859	43496.6	2546	11.2	70	17.1
860	2846	6128	3.6	407	0.5		860	43527.9	3037	17.1	106	14.3
861	2846.9	6495	3.5	391	0.4		861	43610.8	3354	15.5	96	13
862	2847.3	11866	4.4	494	0.2		862	43630.6	2818	9	56	15.5
863	2847.7	7857	2	222	0.4		863	43649.5	2733	21.1	131	16
864	2848.1	6009	3.2	357	0.5		864	43665	3954	46.2	286	11
865	2848.7	5508	2.8	317	0.5		865	43681.5	3162	13.3	82	13.8
866	2849.2	8074	2.9	325	0.4		866	43689.8	3210	10.7	66	13.6
867	2849.6	7650	2.5	283	0.4		867	43702.6	3786	8.6	53	11.5
868	2849.9	7725	2.1	235	0.4		868	43727.9	5538	5.5	34	7.9
869	2850.3	6812	2	220	0.4		869	43793.4	3042	29.1	180	14.4
870	2850.6	7329	1.5	166	0.4		870	43832.3	3850	2.5	16	11.4
871	2851.4	6644	2.8	313	0.4		871	43845.2	2689	6.3	39	16.3
872	2851.8	8176	2.9	319	0.3		872	43858.7	3657	4	24	12
873	2852.1	8857	3.8	419	0.3		873	43881.1	4484	3.7	23	9.8
874	2852.8	14256	7.2	801	0.2		874	43928.6	3329	50.8	314	13.2
875	2853.2	11326	4	440	0.3		875	43992.7	3734	15.3	94	11.8
876	2853.6	8334	2.8	312	0.3		876	44031	3815	1.9	12	11.5
877	2854.3	10073	4.7	526	0.3		877	44048.2	3379	5.1	31	13
878	2854.8	6638	3	334	0.4		878	44063.3	4767	12.5	77	9.2
879	2855.3	6345	2.9	320	0.4		879	44116.1	4525	42.2	261	9.8
880	2856.2	4900	13.4	1493	0.6		880	44129.2	2829	64.5	399	15.6
881	2856.7	5718	11.7	1308	0.5		881	44144.4	3645	25.2	156	12.1
882	2857.2	7701	9.9	1107	0.4		882	44181.5	3108	20.7	128	14.2
883	2857.9	8195	3.2	352	0.3		883	44194.5	3537	20.1	124	12.5
884	2858.5	9330	2.3	259	0.3		884	44208.3	4457	7.8	48	9.9
885	2858.9	7069	1.8	205	0.4		885	44249.4	3884	21.8	135	11.4
886	2859.4	9125	3.5	392	0.3		886	44315.3	2906	13	80	15.2
887	2860.3	4301	8.7	965	0.7		887	44390.4	3710	18.9	117	12
888	2860.8	5963	6.9	765	0.5		888	44404.2	5778	42.3	262	7.7
889	2861.3	6960	5.5	610	0.4		889	44421.7	4631	29.8	184	9.6
890	2861.9	7711	4	442	0.4		890	44467.2	4494	33.8	209	9.9
891	2862.7	9793	3.2	356	0.3		891	44520.7	3060	5.2	32	14.6
892	2863	8974	3.5	394	0.3		892	44597.6	3057	23	142	14.6
893	2863.3	9078	3.5	395	0.3		893	44679.4	2749	49.7	307	16.3
894	2863.9	8933	3.2	354	0.3		894	44709.3	3237	18	111	13.8
895	2864.5	5092	1.4	158	0.6		895	44727.3	2715	37.6	233	16.5
896	2865.3	11394	3	330	0.3		896	44786.2	2381	70.4	435	18.8
897	2866	7643	1.6	180	0.4		897	44852.5	2277	9.8	60	19.7
898	2866.4	10062	2.6	287	0.3		898	44927.7	3620	22	136	12.4
899	2866.8	9018	1.5	169	0.3		899	44944.3	3097	11.5	71	14.5
900	2867.3	4498	2.5	275	0.6		900	44987.8	4405	38.9	240	10.2
901	2867.9	8846	3.7	412	0.3		901	45047.5	3907	18.2	112	11.5
902	2868.3	5463	2.3	252	0.5		902	45104.3	3388	1.8	11	13.3
903	2868.9	7602	2.5	273	0.4		903	45129	5688	12.6	78	7.9
904	2869.3	11986	4.8	538	0.2		904	45169.1	3232	12.3	76	14
905	2869.9	7053	3	330	0.4		905	45211	5564	40.6	251	8.1
906	2870.4	4192	2.9	319	0.7		906	45218.3	4638	42.6	264	9.8
907	2870.9	7656	2	227	0.4		907	45233.6	2689	95.9	594	16.8
908	2871.3	7819	3.6	398	0.4		908	45272.9	4106	17.9	111	11
909	2871.8	6235	2.1	230	0.5		909	45309.8	3600	5.9	36	12.6
910	2873.3	5700	19.2	2139	0.5		910	45324.1	4409	17.5	108	10.3
911	2873.9	8515	18.4	2047	0.3		911	45344.2	3609	6.7	41	12.6
912	2874.8	8318	4.8	530	0.3		912	45391.3	6317	39	242	7.2
913	2875.3	12831	3.8	426	0.2		913	45407.7	6460	10.5	65	7
914	2876	9122	2.1	231	0.3		914	45444.8	3193	5.8	36	14.2
915	2876.4	6853	2	221	0.4		915	45463.1	3616	15.9	98	12.6
916	2876.9	15093	8.8	980	0.2		916	45512	3679	33.3	206	12.4
917	2877.3	11388	4	440	0.3		917	45547.7	4876	30.3	187	9.3
918	2877.8	10383	3.9	440	0.3		918	45601.6	3258	11.4	70	14
919	2877.9	9185	4.3	482	0.3		919	45637	2268	3	18	20.1
920	2878.3	6534	4.1	457	0.4		920	45667.8	3295	14.9	92	13.9
921	2878.7	8165	4.3	484	0.4		921	45691	3100	6.4	39	14.7
922	2879.3	7371	3.2	359	0.4		922	45706.7	2446	3.3	21	18.7
923	2879.8	12460	4.1	453	0.2		923	45739.8	3405	33.7	208	13.4
924	2880.4	10021	2.2	245	0.3		924	45826.9	3379	45.2	280	13.6
925	2880.8	14315	1.8	204	0.2		925	45876.1	2687	5.1	31	17.1
926	2881.3	14101	4.4	490	0.2		926	45897.9	3921	7	43	11.7
927	2881.8	7153	2.7	298	0.4		927	45921.3	3212	7.1	44	14.3
928	2882.8	7564	4	447	0.4		928	45930.9	2843	6.3	39	16.2
929	2883.4	5717	2.9	322	0.5		929	45948.6	2469	7.1	44	18.6
930	2883.9	6988	2.7	298	0.4		930	45964	2804	6.2	38	16.4
931	2884.4	8777	2.7	302	0.3		931	45989.4	3939	21	130	11.7
932	2885	6429	1.5	171	0.4		932	46029.2	2253	3.4	21	20.4
933	2885.3	10550	2.1	236	0.3		933	46056.3	3289	3.4	21	14
934	2885.7	9135	1.5	169	0.3		934	46076.7	2966	3.1	19	15.5
935	2885.9	9505	1.6	178	0.3		935	46104.7	2702	9.6	60	17.1
936	2886.5	6908	1.9	209	0.4		936	46121.3	2089	9.9	61	22.1
937	2886.8	8730	2.2	244	0.3		937	46144.1	3294	3.6	22	14
938	2887.3	10675	3.3	373	0.3		938	46160	4734	1.7	10	9.8
939	2888	8505	2.3	251	0.3		939	46178.2	3577	11.5	71	12.9
940	2888.5	4741	2	225	0.6		940	46210.3	3792	38.2	236	12.2
941	2889.3	12939	3.7	412	0.2		941	46250.6	4888	5.5	34	9.5
942	2889.9	8563	1.3	148	0.3		942	46268.8	3348	4.9	31	13.8
943	2890.4	9082	3.2	355	0.3		943	46281.1	2874	3.5	21	16.1
944	2890.8	9548	2.1	235	0.3		944	46331.9	4024	29.2	181	11.5
945	2891.3	11844	3.9	431	0.2		945	46363.3	2484	3.8	23	18.7
946	2891.8	10008	1.6	174	0.3		946	46378.6	4350	3.1	19	10.7
947	2892.1	8079	1.7	184	0.4		947	46393.3	5630	11.2	69	8.2
948	2892.6	5788	1.1	119	0.5		948	46408.9	3388	3	19	13.7
949	2893.3	8622	1.1	127	0.3		949	46426.9	4203	4.5	28	11
950	2893.9	8273	1.4	151	0.3		950	46462.6	3039	13.7	85	15.3
951	2894.6	9192	1.4	156	0.3		951	46475.5	3156	16.7	103	14.7
952	2895.3	9770	2.5	273	0.3		952	46497.7	4769	5	31	9.8
953	2895.7	9859	1.6	181	0.3		953	46513.8	3284	11.8	73	14.2
954	2896.2	8949	1.8	197	0.3		954	46564.3	3249	3.2	20	14.3
955	2896.8	9115	1.2	133	0.3		955	46584	3820	3.1	19	12.2
956	2897.3	12485	1.1	119	0.2		956	46624.2	3411	5.5	34	13.7
957	2897.8	10030	1.6	177	0.3		957	46642.2	4489	105.2	651	10.4
958	2898.1	7026	1.1	128	0.4		958	46686	3369	4.3	27	13.9
959	2898.4	7026	1.2	133	0.4		959	46718.9	57500	12.3	76	0.8
960	2899.4	6443	2.6	290	0.4		960	46807.2	2749	103.9	643	17
961	2899.9	7373	3.2	360	0.4		961	46818.6	3573	81.1	502	13.1
962	2900.4	5876	2.9	328	0.5		962	46864.4	3060	12	74	15.3
963	2901.3	13959	6.4	711	0.2		963	46908.1	2838	9.6	60	16.5
964	2901.8	7006	2.3	256	0.4		964	46956.8	4816	5.2	32	9.8
965	2902.3	13938	8.8	975	0.2		965	46971.2	3272	9.1	56	14.4
966	2902.8	5542	2.1	234	0.5		966	46986.9	3954	15.1	93	11.9
967	2903.3	13970	6.8	756	0.2		967	47026.4	3499	48.6	301	13.4
968	2903.9	8759	3.2	359	0.3		968	47073.9	3222	20.9	130	14.6
969	2904.4	14871	8.7	969	0.2		969	47116	2197	2.1	13	21.4
970	2904.9	5287	5.5	616	0.5		970	47142.9	3204	13.8	85	14.7
971	2905.4	12038	15	1671	0.2		971	47227.9	3694	65.8	407	12.8
972	2906	7880	11	1224	0.4		972	47251.2	4846	11.4	71	9.8
973	2906.4	7657	10.2	1141	0.4		973	47295	2294	13.3	82	20.6
974	2906.8	5085	9.1	1017	0.6		974	47357.7	5299	44.5	275	8.9
975	2907.3	5494	10.9	1212	0.5		975	47362.1	5999	44	272	7.9
976	2908.7	6611	102.8	11456	0.4		976	47382.2	5795	17.7	110	8.2
977	2909	5967	99.3	11058	0.5		977	47426.4	3327	12.1	75	14.3
978	2911.4	6558	10.7	1196	0.4		978	47462.1	2659	6.7	41	17.8
979	2911.9	5268	11.6	1289	0.6		979	47496.8	2555	19.8	122	18.6
980	2912.3	4094	12.7	1418	0.7		980	47535.1	5475	11.7	73	8.7
981	2912.8	5139	10.2	1137	0.6		981	47554.4	4877	4.2	26	9.8
982	2913.3	5946	6.2	696	0.5		982	47574.7	2807	6.1	37	16.9
983	2913.9	4559	4.6	507	0.6		983	47590.9	3018	7.1	44	15.8
984	2914.8	5342	6.6	737	0.5		984	47643.9	2718	5.9	36	17.5
985	2915.5	4859	6.7	742	0.6		985	47677.4	2676	6.5	40	17.8
986	2916	6779	10.1	1121	0.4		986	47702.9	2847	7.6	47	16.8
987	2916.6	4682	9	1007	0.6		987	47720.9	2658	10.7	66	18
988	2917	6311	12.5	1396	0.5		988	47761	2078	12.2	75	23
989	2917.4	5210	12.8	1421	0.6		989	47774.8	3267	8.7	54	14.6
990	2918.1	7074	16	1780	0.4		990	47788.1	3396	7.2	45	14.1
991	2918.6	7075	14	1564	0.4		991	47845.2	3218	16.8	104	14.9
992	2919.3	7135	6.4	712	0.4		992	47852.4	3681	15.9	98	13
993	2919.8	9516	6.3	696	0.3		993	47892.4	4074	9.4	58	11.8
994	2920.4	5698	6.2	696	0.5		994	47903.8	3468	7.1	44	13.8
995	2920.9	5807	6.4	713	0.5		995	47920.9	2184	9.3	57	21.9
996	2921.4	9204	10.1	1123	0.3		996	47940.9	3355	19.1	118	14.3
997	2922.4	5355	4.7	528	0.5		997	47985	3724	15.3	95	12.9
998	2922.8	5485	3.8	422	0.5		998	47990.5	4219	16.3	101	11.4
999	2923.4	11162	6.6	732	0.3		999	48014.7	2859	3.1	19	16.8
1000	2924.1	6249	5.7	631	0.5		1000	48050	3612	6.3	39	13.3
1001	2924.9	4002	10.7	1194	0.7		1001	48125.6	2467	18.2	113	19.5
1002	2925.4	11588	17.2	1921	0.3		1002	48151.6	3103	19.7	122	15.5
1003	2926.4	15927	7.5	836	0.2		1003	48191.7	5338	20.8	129	9
1004	2926.8	12415	1.8	202	0.2		1004	48227.1	3304	22.9	142	14.6
1005	2927.4	16386	5.5	616	0.2		1005	48247.4	2682	18.4	114	18
1006	2927.9	8720	2.1	232	0.3		1006	48266.3	2799	11	68	17.2
1007	2928.4	12137	4.6	515	0.2		1007	48283.5	2658	9.1	56	18.2
1008	2929	8190	2.7	302	0.4		1008	48304.9	3283	17.8	110	14.7
1009	2929.4	12460	7.9	877	0.2		1009	48322.4	3508	9.8	61	13.8
1010	2929.9	8622	8.2	913	0.3		1010	48354.7	4274	3.8	24	11.3
1011	2930.4	8971	15	1670	0.3		1011	48369.3	4312	10.6	65	11.2
1012	2930.8	4607	10.6	1184	0.6		1012	48400	4414	4.5	28	11
1013	2931.3	13110	18.5	2065	0.2		1013	48449.3	4104	12.6	78	11.8
1014	2931.8	7726	6.1	681	0.4		1014	48467.5	2879	14.9	92	16.8
1015	2932.3	14362	12	1339	0.2		1015	48524.4	2555	54.2	335	19
1016	2932.8	9652	2.8	315	0.3		1016	48541.2	3440	64.1	397	14.1
1017	2933.3	14687	7.4	819	0.2		1017	48592	3592	34.2	212	13.5
1018	2933.8	6302	2.1	231	0.5		1018	48644.4	3742	17.8	110	13
1019	2934.3	13483	5.2	579	0.2		1019	48669.1	2995	10.7	66	16.3
1020	2934.9	4997	1.8	196	0.6		1020	48679.4	5991	8.1	50	8.1
1021	2935.4	14611	6	669	0.2		1021	48687.4	3745	8.3	51	13
1022	2936	7795	2.7	300	0.4		1022	48708.1	3254	26.8	166	15
1023	2936.3	9377	2.3	256	0.3		1023	48727.4	3368	13.5	83	14.5
1024	2936.7	9315	1.7	188	0.3		1024	48737.5	2894	12.4	77	16.8
1025	2937.3	15695	4.1	459	0.2		1025	48797.6	2431	17.9	111	20.1
1026	2937.9	6746	1	114	0.4		1026	48812.9	4762	27.9	172	10.2
1027	2938.4	16272	4.7	525	0.2		1027	48844.4	3309	7.3	45	14.8
1028	2938.9	10127	2.2	242	0.3		1028	48870	3226	30.7	190	15.1
1029	2939.3	10932	3.3	369	0.3		1029	48941.2	3207	78.4	485	15.3
1030	2939.9	9710	1.9	212	0.3		1030	49001.7	3006	10.3	64	16.3
1031	2940.3	7171	1.7	185	0.4		1031	49057.3	3194	5.7	35	15.4
1032	2940.8	10717	1	110	0.3		1032	49091	2723	17.6	109	18
1033	2941.3	18174	10.2	1132	0.2		1033	49154.8	4339	26.3	163	11.3
1034	2941.9	9579	1.3	150	0.3		1034	49165	4527	47.5	294	10.9
1035	2942.3	17753	27	3005	0.2		1035	49191.9	3580	6.1	38	13.7
1036	2942.8	11111	3.5	391	0.3		1036	49203.2	3191	4.9	30	15.4
1037	2943.3	16691	19	2116	0.2		1037	49236.4	3152	13.6	84	15.6
1038	2943.9	10637	2.4	268	0.3		1038	49255.9	2944	34	211	16.7
1039	2944.4	15140	5.6	621	0.2		1039	49294.7	4959	11.1	68	9.9
1040	2944.9	11011	1	108	0.3		1040	49324.5	3794	19.1	118	13
1041	2945.3	16744	7.1	791	0.2		1041	49337.7	3957	25.5	158	12.5
1042	2945.8	14665	1.4	151	0.2		1042	49355.3	7493	54.9	340	6.6
1043	2946.4	15884	12.6	1404	0.2		1043	49419.4	2309	37.9	235	21.4
1044	2947.4	14013	20.5	2289	0.2		1044	49483	3765	69.6	430	13.1
1045	2948.4	5142	26.6	2967	0.6		1045	49498.9	3584	15.4	95	13.8
1046	2948.8	5841	19.7	2197	0.5		1046	49522.9	2771	6.9	43	17.9
1047	2949.3	7836	18.3	2043	0.4		1047	49553.7	2723	50.2	310	18.2
1048	2949.8	7894	8.5	945	0.4		1048	49576.4	2835	100.1	620	17.5
1049	2950.3	19138	113.8	12680	0.2		1049	49623.1	3511	9.4	58	14.1
1050	2950.8	18222	3.9	437	0.2		1050	49632.5	3425	10	62	14.5
1051	2951.4	20120	183.7	20462	0.1		1051	49718.1	3000	8.3	51	16.6
1052	2951.9	17816	6.1	676	0.2		1052	49734.4	4260	8.5	52	11.7
1053	2952.4	19422	153.9	17139	0.2		1053	49750.5	3827	5.3	33	13
1054	2952.9	16951	5.7	638	0.2		1054	49788	4088	2.4	15	12.2
1055	2953.4	18341	95.2	10611	0.2		1055	49883.2	4338	1.8	11	11.5
1056	2953.9	13212	3.9	433	0.2		1056	49921.3	3718	7.2	44	13.4
1057	2954.4	17578	39.7	4420	0.2		1057	49959.5	3945	85.2	527	12.7
1058	2954.9	11790	1.3	145	0.3		1058	49977.2	3576	55.2	341	14
1059	2955.4	14389	12.6	1405	0.2		1059	49993.7	1963	78.7	487	25.5
1060	2956.4	11346	17.1	1903	0.3		1060	50015	2695	41.9	260	18.6
1061	2956.9	7313	14.6	1626	0.4		1061	50038.5	2644	24.3	150	18.9
1062	2957.3	8322	18.9	2103	0.4		1062	50067.8	3100	13.6	84	16.1
1063	2958.3	12304	51.3	5710	0.2		1063	50096.3	3083	7.4	46	16.3
1064	2958.7	15461	18.4	2053	0.2		1064	50147.2	3064	50.2	311	16.4
1065	2959.3	19777	32959.5	3671593	0.1		1065	50166.4	4905	29.5	183	10.2
1066	2959.9	21510	979	109054	0.1		1066	50195	4752	16.3	101	10.6
1067	2960.4	20602	71524	7967557	0.1		1067	50225.3	4378	57.3	355	11.5
1068	2960.9	21537	1761.4	196214	0.1		1068	50263.5	5155	3.5	22	9.8
1069	2961.4	21714	64964.2	7236811	0.1		1069	50283.1	3600	14.3	88	14
1070	2961.9	20770	1150.6	128169	0.1		1070	50325.5	7314	9.9	61	6.9
1071	2962.4	21751	42494.8	4733788	0.1		1071	50342.4	7693	22.2	138	6.5
1072	2962.9	20495	362.7	40402	0.1		1072	50362.2	4608	14.8	91	10.9
1073	2963.4	20258	19507.5	2173072	0.1		1073	50378.8	3928	43.5	269	12.8
1074	2964.4	21584	9336	1040001	0.1		1074	50397.3	2530	20.9	129	19.9
1075	2964.9	18477	23.5	2620	0.2		1075	50452.6	4790	46.9	290	10.5
1076	2965.4	21616	3686.3	410647	0.1		1076	50473.2	3104	8.1	50	16.3
1077	2965.9	17120	65.2	7264	0.2		1077	50496.7	2486	2.5	15	20.3
1078	2966.4	19639	1150.9	128208	0.2		1078	50553.3	3809	1.9	12	13.3
1079	2966.9	14278	54.2	6043	0.2		1079	50565.8	2571	2.3	14	19.7
1080	2967.4	17835	318.9	35520	0.2		1080	50605.5	2817	2.1	13	18
1081	2967.9	11984	28.9	3220	0.2		1081	50634.7	2937	12.7	79	17.2
1082	2968.4	15236	100.5	11200	0.2		1082	50656.1	4254	24.7	153	11.9
1083	2968.9	7554	18	2007	0.4		1083	50684.9	3283	4.8	29	15.4
1084	2969.4	13025	37.4	4168	0.2		1084	50708.1	3018	23.6	146	16.8
1085	2969.9	6920	8.5	942	0.4		1085	50743.3	2934	13.4	83	17.3
1086	2970.5	7586	13	1451	0.4		1086	50780.1	3030	14.4	89	16.8
1087	2971.5	10098	10.9	1216	0.3		1087	50817.1	3025	87.5	542	16.8
1088	2972.3	14451	16.5	1838	0.2		1088	50838.9	3293	25.3	157	15.4
1089	2973.4	20322	356.3	39691	0.1		1089	50859	3550	64.7	401	14.3
1090	2974.4	22111	591.1	65846	0.1		1090	50884.5	2975	22.5	140	17.1
1091	2974.9	19386	3.8	426	0.2		1091	50907.2	3630	23.7	147	14
1092	2975.4	20589	662	73748	0.1		1092	50936.2	2270	11.1	69	22.4
1093	2975.9	21164	0.2	19	0.1		1093	50964.3	4054	98.6	610	12.6
1094	2976.4	20172	576.6	64234	0.1		1094	51014.3	3376	2.9	18	15.1
1095	2977.4	21136	406.9	45324	0.1		1095	51058.5	4489	2.5	16	11.4
1096	2978.4	21076	232.3	25881	0.1		1096	51067.1	3697	2.4	15	13.8
1097	2979.4	17360	112.4	12523	0.2		1097	51083.3	3698	2.4	15	13.8
1098	2979.9	11025	2.6	293	0.3		1098	51252.7	4072	2	12	12.6
1099	2980.4	16653	63.3	7049	0.2		1099	51311.1	6002	2.8	17	8.5
1100	2981.3	21554	2564.6	285691	0.1		1100	51331	6104	11.3	70	8.4
1101	2982.3	20732	3796.1	422877	0.1		1101	51367.7	2516	3.8	23	20.4
1102	2983.3	21194	3399.8	378731	0.1		1102	51387.4	3017	4.2	26	17
1103	2984.3	21671	2150.8	239588	0.1		1103	51407.1	3805	18.6	115	13.5
1104	2985.3	21075	1007.8	112271	0.1		1104	51429.2	4078	14.8	92	12.6
1105	2985.9	20104	1.5	166	0.1		1105	51503.5	2348	596	3688	21.9
1106	2986.3	19842	450.8	50218	0.2		1106	51523.5	2882	761.2	4711	17.9
1107	2986.8	19430	11.4	1271	0.2		1107	51544.1	3172	1134.3	7019	16.3
1108	2987.4	20511	256.5	28571	0.1		1108	51575.9	3028	1915.4	11853	17
1109	2987.8	19917	13.2	1467	0.2		1109	51590.5	3969	1685.4	10430	13
1110	2988.4	20273	148.9	16587	0.1		1110	51600.4	2887	1563	9672	17.9
1111	2988.8	19344	14.5	1613	0.2		1111	51620.3	1925	1694.8	10488	26.8
1112	2989.4	20724	94.9	10571	0.1		1112	51646	1696	2001.4	12386	30.5
1113	2989.8	18232	5.2	580	0.2		1113	51700.8	3954	687.8	4257	13.1
1114	2990.4	19488	57.5	6401	0.2		1114	51735.3	2393	167	1033	21.6
1115	2990.8	20245	0.5	57	0.1		1115	51751.6	2938	104.3	645	17.6
1116	2991.3	21072	79.2	8828	0.1		1116	51780.4	2764	69.3	429	18.7
1117	2992.4	20171	82.3	9173	0.1		1117	51800.3	2626	39	241	19.7
1118	2993.4	20832	67.3	7497	0.1		1118	51819.3	3543	22.7	141	14.6
1119	2994.4	19457	42.4	4724	0.2		1119	51838.7	2912	44.1	273	17.8
1120	2995.4	20936	36.6	4075	0.1		1120	51858.6	3130	18.7	116	16.6
1121	2996.3	19249	30	3339	0.2		1121	51887	3476	1.9	12	14.9
1122	2996.8	18549	2.6	293	0.2		1122	52378.4	3596	199016	1231588	14.6
1123	2997.3	19369	180.3	20083	0.2		1123	52449	3243	6025	37285	16.2
1124	2997.8	17835	1.2	134	0.2		1124	52476.5	6972	1500.1	9283	7.5
1125	2998.3	21068	295.5	32918	0.1		1125	52498	7503	2.8	17	7
1126	2999.3	21062	245.6	27355	0.1		1126	52557.1	3703	31313.4	193780	14.2
1127	2999.8	18806	0.7	78	0.2		1127	52618.7	3090	31897.2	197392	17
1128	3000.3	21466	166.9	18596	0.1		1128	52635.9	2943	22030.7	136335	17.9
1129	3000.8	19311	1.8	201	0.2		1129	52698.4	3760	42827.2	265031	14
1130	3001.3	20052	106	11806	0.1		1130	52778.5	4976	12837.3	79442	10.6
1131	3001.8	18728	0.7	79	0.2		1131	52858.6	7824	1905.3	11790	6.8
1132	3002.3	19724	84.4	9399	0.2		1132	52876.7	8342	334.6	2071	6.3
1133	3002.8	19685	0.6	69	0.2		1133	52938.2	4376	16634.1	102938	12.1
1134	3003.3	20890	196.8	21924	0.1		1134	53017.8	8339	103.7	642	6.4
1135	3003.8	19827	0.4	39	0.2		1135	53097.2	5667	6.1	38	9.4
1136	3004.3	20408	242.6	27021	0.1		1136	53176	5093	92.5	572	10.4
1137	3004.8	21673	0.2	24	0.1		1137	53196.4	4891	5.9	36	10.9
1138	3005.3	19822	199.9	22263	0.2		1138	53256.1	3371	14.1	87	15.8
1139	3005.8	18704	0.2	24	0.2		1139	53267.5	4430	12.3	76	12
1140	3006.3	20599	129.2	14392	0.1		1140	53284.6	6261	10.9	67	8.5
1141	3006.8	18365	2.4	272	0.2		1141	53305.3	4796	7.7	48	11.1
1142	3007.3	18953	76.8	8558	0.2		1142	53314.8	5048	4.6	29	10.6
1143	3007.8	15970	1.3	144	0.2		1143	53342.4	3985	3.2	20	13.4
1144	3008.3	20385	63.3	7046	0.1		1144	53396.3	3459	5.4	33	15.4
1145	3008.8	18836	1.5	168	0.2		1145	53420	4161	6.1	38	12.8
1146	3009.3	19241	57.2	6372	0.2		1146	53496.5	3170	66.5	412	16.9
1147	3009.8	18121	3.7	415	0.2		1147	53551.8	4742	3.1	19	11.3
1148	3010.3	19841	73.8	8216	0.2		1148	53637.4	3368	2	13	15.9
1149	3010.8	16764	3.4	377	0.2		1149	53736.4	2417	4	25	22.2
1150	3011.3	19295	70.3	7827	0.2		1150	53818.3	3413	17964.2	111169	15.8
1151	3011.7	20470	1.7	194	0.1		1151	53871.8	3684	120.8	748	14.6
1152	3012.3	21210	449.4	50060	0.1		1152	53894.9	4734	416.8	2579	11.4
1153	3013.3	20954	708.9	78966	0.1		1153	53919.7	2717	60.4	374	19.8
1154	3014.3	20094	586.4	65327	0.2		1154	53936.6	3208	80.2	497	16.8
1155	3014.8	22142	3.2	358	0.1		1155	53962.9	6038	40	248	8.9
1156	3015.3	21619	593.7	66139	0.1		1156	53988.6	3887	954.7	5908	13.9
1157	3015.8	20636	2.3	260	0.1		1157	54040.6	2558	19.1	118	21.1
1158	3016.3	20726	504.7	56221	0.1		1158	54059.9	3124	27.2	168	17.3
1159	3016.8	20138	5.4	604	0.1		1159	54077.6	3199	13.9	86	16.9
1160	3017.3	20809	483.5	53861	0.1		1160	54121.5	5456	6.2	38	9.9
1161	3017.8	18296	3.6	403	0.2		1161	54153.6	3508	9.4	58	15.4
1162	3018.3	19756	391.1	43569	0.2		1162	54199.9	1930	1.9	12	28.1
1163	3018.8	18609	10.1	1129	0.2		1163	54219.1	2780	1.6	10	19.5
1164	3019.3	19331	310	34537	0.2		1164	54254.1	4775	376.4	2329	11.4
1165	3019.9	9637	60.1	6693	0.3		1165	54289.5	6097	6.6	41	8.9
1166	3020.3	14322	323.8	36072	0.2		1166	54311.7	3962	7.9	49	13.7
1167	3020.8	6176	132	14704	0.5		1167	54324.9	2877	9.1	56	18.9
1168	3021.3	10124	216.1	24069	0.3		1168	54337.9	6182	4.8	30	8.8
1169	3021.7	7449	64.3	7164	0.4		1169	54459.5	3003	4.7	29	18.1
1170	3022.3	13621	90.1	10034	0.2		1170	54535.8	2749	5.7	35	19.8
1171	3022.8	12476	15	1667	0.2		1171	54561.2	5818	16.5	102	9.4
1172	3023.3	16458	55.4	6173	0.2		1172	54615.9	3976	89.5	554	13.7
1173	3023.8	9995	13.3	1485	0.3		1173	54658.6	3247	29.6	183	16.8
1174	3024.3	16143	55.4	6173	0.2		1174	54682.4	3739	29.2	181	14.6
1175	3024.8	9605	13.8	1541	0.3		1175	54725.8	3214	41	254	17
1176	3025.3	15621	50.1	5579	0.2		1176	54761.7	3225	39.7	246	17
1177	3025.8	9012	14.5	1620	0.3		1177	54803.4	4216	66.7	413	13
1178	3026.3	14893	44.7	4979	0.2		1178	54833	2884	8.8	55	19
1179	3026.8	10425	9.6	1072	0.3		1179	54872.5	2866	11.4	70	19.1
1180	3027.3	17020	34.6	3852	0.2		1180	54888.1	3556	6.8	42	15.4
1181	3027.8	12308	4.8	538	0.2		1181	54912.7	3010	7.3	45	18.2
1182	3028.4	17485	41.7	4642	0.2		1182	54938.6	3381	22.2	137	16.3
1183	3028.9	17154	4.2	473	0.2		1183	54974.1	3980	12	75	13.8
1184	3029.4	17363	52.6	5857	0.2		1184	54987.7	4834	10.1	62	11.4
1185	3029.9	15733	8.2	908	0.2		1185	55014.8	3017	12.3	76	18.2
1186	3030.4	17577	58	6462	0.2		1186	55041.7	2887	14.6	91	19.1
1187	3030.9	17267	10.1	1127	0.2		1187	55059.1	3234	15.2	94	17
1188	3031.4	19441	95.2	10603	0.2		1188	55081.9	6163	2.7	17	8.9
1189	3031.9	17519	3.4	376	0.2		1189	55100.6	2622	5.7	36	21
1190	3032.4	20223	111.2	12387	0.1		1190	55143.7	3527	10.3	64	15.6
1191	3032.9	18127	4	451	0.2		1191	55185.3	2835	11	68	19.5
1192	3033.4	18818	109.5	12193	0.2		1192	55210.3	4279	8.7	54	12.9
1193	3033.9	16771	8.5	950	0.2		1193	55228.9	3478	32.1	199	15.9
1194	3034.4	16726	65.6	7313	0.2		1194	55259.9	8030	169.6	1050	6.9
1195	3034.8	16870	4.5	506	0.2		1195	55279.6	4499	92.2	570	12.3
1196	3035.3	18138	64	7128	0.2		1196	55314.4	4320	47.7	295	12.8
1197	3035.8	10309	4.4	494	0.3		1197	55333.4	3692	14.6	90	15
1198	3036.3	16453	38.9	4330	0.2		1198	55374.8	4498	12.4	77	12.3
1199	3036.8	16386	9.9	1106	0.2		1199	55395	3588	5.9	37	15.4
1200	3037.3	16064	37.7	4197	0.2		1200	55419.4	3270	24.3	150	16.9
1201	3037.8	14552	6.2	694	0.2		1201	55442.9	4781	8.4	52	11.6
1202	3038.3	17197	27	3003	0.2		1202	55458	4291	19.6	121	12.9
1203	3038.7	15581	4	447	0.2		1203	55469.8	6206	16.6	103	8.9
1204	3039.3	18494	27.8	3099	0.2		1204	55478.1	3793	22.3	138	14.6
1205	3039.8	17089	2.7	306	0.2		1205	55503.7	4238	54.5	337	13.1
1206	3040.3	19646	26	2893	0.2		1206	55539.7	3107	66.4	411	17.9
1207	3040.8	19805	2	223	0.2		1207	55593.7	2516	42.2	261	22.1
1208	3041.3	20147	43.5	4845	0.2		1208	55623.7	3124	9.8	61	17.8
1209	3041.8	14990	1.6	181	0.2		1209	55651.1	3573	10.8	67	15.6
1210	3042.3	18437	48.8	5435	0.2		1210	55708.1	3583	3.5	22	15.5
1211	3042.8	14263	6.2	687	0.2		1211	55738.5	3552	3.2	20	15.7
1212	3043.3	16393	47.7	5317	0.2		1212	55757.5	3686	11.6	72	15.1
1213	3043.8	10829	7.8	865	0.3		1213	55793.5	2695	6.5	40	20.7
1214	3044.3	17540	34.6	3850	0.2		1214	55821.7	3890	12	74	14.3
1215	3044.8	10149	3.7	414	0.3		1215	55833	2750	14	87	20.3
1216	3045.3	17877	21.2	2358	0.2		1216	55878.7	3171	12.9	80	17.6
1217	3045.8	13721	1.6	180	0.2		1217	55898.5	3923	9.8	61	14.3
1218	3046.3	15274	12	1333	0.2		1218	55926.3	4302	5.1	32	13
1219	3046.8	12300	2.4	271	0.2		1219	55971.2	3552	9.1	57	15.8
1220	3047.3	14864	11.6	1290	0.2		1220	55988.8	3238	13.5	84	17.3
1221	3047.7	8873	3.3	364	0.3		1221	56052.4	3189	20.1	124	17.6
1222	3048.3	16330	20.2	2254	0.2		1222	56071.3	4056	22.9	142	13.8
1223	3048.8	12132	5.3	591	0.3		1223	56122.7	4423	6.3	39	12.7
1224	3049.3	14175	22.9	2555	0.2		1224	56135.6	2696	8.5	52	20.8
1225	3050.3	17881	27.4	3048	0.2		1225	56177.2	3721	251.8	1558	15.1
1226	3050.8	16276	2	224	0.2		1226	56205.1	3082	22.3	138	18.2
1227	3051.3	17529	21.8	2428	0.2		1227	56228.6	4114	18.1	112	13.7
1228	3051.8	15512	1.7	187	0.2		1228	56246.9	7016	30.9	191	8
1229	3052.3	14912	13.6	1519	0.2		1229	56265.4	8023	33.5	207	7
1230	3052.8	16802	2.2	249	0.2		1230	56289.2	5669	16.7	103	9.9
1231	3053.3	16153	13.4	1495	0.2		1231	56306.8	2914	36.9	229	19.3
1232	3053.8	15410	3.1	344	0.2		1232	56330.7	3941	31.2	193	14.3
1233	3054.3	15879	13.3	1485	0.2		1233	56402.1	3019	40.5	251	18.7
1234	3054.8	13022	1.3	144	0.2		1234	56476	4385	49.8	308	12.9
1235	3055.3	17084	16.1	1797	0.2		1235	56511	3661	30.8	191	15.4
1236	3055.8	13313	3.3	367	0.2		1236	56543.4	2196	30.4	188	25.7
1237	3056.4	16630	43.5	4848	0.2		1237	56601.6	2869	7.5	46	19.7
1238	3056.8	12788	3.5	390	0.2		1238	56628.6	2792	8.2	51	20.3
1239	3057.4	18758	64.3	7162	0.2		1239	56653.5	4514	18.7	116	12.6
1240	3057.9	19629	1.8	202	0.2		1240	56677.4	2841	27.7	172	20
1241	3058.4	19169	58.4	6510	0.2		1241	56740.1	2823	25.8	159	20.1
1242	3058.9	17309	1.1	123	0.2		1242	56801.3	2414	9.7	60	23.5
1243	3059.4	19124	43.5	4850	0.2		1243	56836.3	4115	26.6	164	13.8
1244	3059.9	15727	1.8	199	0.2		1244	56859.6	3806	18	111	14.9
1245	3060.4	17403	26.9	3002	0.2		1245	56888	4376	11.5	71	13
1246	3060.9	12766	7	781	0.2		1246	56934	3595	28.3	175	15.8
1247	3061.4	9723	34.1	3796	0.3		1247	56941.4	4295	26.6	165	13.3
1248	3061.9	8980	21.4	2387	0.3		1248	56967.7	4124	4.7	29	13.8
1249	3062.3	10534	37	4121	0.3		1249	57005.5	3161	20.9	129	18
1250	3062.8	5813	14.7	1632	0.5		1250	57021.4	2537	21.7	134	22.5
1251	3063.3	11404	21.6	2407	0.3		1251	57040.8	3114	11.9	74	18.3
1252	3063.8	7537	7.9	874	0.4		1252	57102.5	4032	69.2	428	14.2
1253	3064.3	11493	14.6	1623	0.3		1253	57177.4	5027	18.7	116	11.4
1254	3064.8	7825	3	333	0.4		1254	57192.3	4399	15	93	13
1255	3065.3	13659	10.6	1178	0.2		1255	57197.8	5332	14.7	91	10.7
1256	3065.8	9053	3.8	419	0.3		1256	57213	4009	13.1	81	14.3
1257	3066.3	11813	10.1	1124	0.3		1257	57232.7	4144	6.2	38	13.8
1258	3066.8	12546	4	442	0.2		1258	57255.2	5116	104.2	645	11.2
1259	3067.3	11378	9.2	1029	0.3		1259	57269.5	4002	112.7	697	14.3
1260	3067.8	11270	1.7	191	0.3		1260	57347.2	3349	29.9	185	17.1
1261	3068.2	15231	10.4	1158	0.2		1261	57415.3	5047	8.1	50	11.4
1262	3068.7	15354	2	222	0.2		1262	57439.6	2307	24.1	149	24.9
1263	3069.2	13550	9.2	1024	0.2		1263	57483.9	3931	18.6	115	14.6
1264	3069.8	8721	3.1	349	0.4		1264	57523.1	3962	14.6	91	14.5
1265	3070.2	13989	12.9	1441	0.2		1265	57529.9	3727	15.8	98	15.4
1266	3071.2	13258	11.2	1249	0.2		1266	57583.1	3320	13	80	17.3
1267	3072.3	13048	10	1116	0.2		1267	57595.3	2835	12.4	77	20.3
1268	3072.7	14353	1.6	174	0.2		1268	57620.9	3338	8.4	52	17.3
1269	3073.3	14667	9.6	1071	0.2		1269	57667.1	3801	25.4	157	15.2
1270	3074.3	12079	8.1	905	0.3		1270	57680.8	4437	12.4	77	13
1271	3075.4	7711	14.2	1581	0.4		1271	57726.3	2654	13.1	81	21.8
1272	3076.4	9209	28.6	3181	0.3		1272	57753	5009	31.1	193	11.5
1273	3076.8	6837	19.2	2144	0.4		1273	57798.3	4092	9.6	59	14.1
1274	3077.3	7666	20	2226	0.4		1274	57807.1	2816	8.5	53	20.5
1275	3078.3	5666	12.3	1365	0.5		1275	57836.7	3879	19	118	14.9
1276	3080.2	9126	206.1	22957	0.3		1276	57863.4	3106	16.4	101	18.6
1277	3081.2	7391	88.1	9818	0.4		1277	57889.4	3347	47.8	296	17.3
1278	3082.3	13126	50.1	5581	0.2		1278	57923.5	4194	5.1	31	13.8
1279	3082.7	8302	9.6	1075	0.4		1279	57948.3	3754	7.5	46	15.4
1280	3083.3	13187	42.7	4759	0.2		1280	57970.9	2715	12.6	78	21.3
1281	3083.8	8546	8.8	978	0.4		1281	57991	3170	11.6	72	18.3
1282	3084.3	11165	36.2	4033	0.3		1282	58022	4084	4.4	27	14.2
1283	3085.3	9785	48.9	5453	0.3		1283	58059.6	3802	67.7	419	15.3
1284	3086.2	11691	36.2	4032	0.3		1284	58098.6	4136	19.9	123	14
1285	3086.8	9917	7.8	870	0.3		1285	58111	6502	11.9	74	8.9
1286	3087.2	15546	27.7	3087	0.2		1286	58122.5	4167	18.8	116	13.9
1287	3087.7	9918	2.8	314	0.3		1287	58144.8	3391	68	421	17.1
1288	3088.3	11232	23	2567	0.3		1288	58205.5	2887	5.3	33	20.2
1289	3089.3	10328	28.9	3215	0.3		1289	58220.9	5133	14.4	89	11.3
1290	3089.9	9011	10.8	1199	0.3		1290	58229.7	6515	8.9	55	8.9
1291	3090.4	10956	29.5	3286	0.3		1291	58239	5333	12.1	75	10.9
1292	3090.9	8845	6	672	0.3		1292	58259.3	4218	9.1	56	13.8
1293	3091.4	10802	17.2	1917	0.3		1293	58285.8	3152	60.3	373	18.5
1294	3091.8	9161	1.9	212	0.3		1294	58301.9	3390	91.1	564	17.2
1295	3092.3	10427	11.1	1231	0.3		1295	58380.9	2703	46.2	286	21.6
1296	3092.8	8026	3.1	348	0.4		1296	58470.3	3147	16.4	101	18.6
1297	3093.4	7904	13.2	1471	0.4		1297	58490.8	3130	34.7	215	18.7
1298	3094.4	5157	27.3	3046	0.6		1298	58543.9	2398	40.8	252	24.4
1299	3094.8	8313	28.1	3125	0.4		1299	58570	3004	26.2	162	19.5
1300	3095.3	6679	27	3004	0.5		1300	58646.1	3850	48.5	300	15.2
1301	3096.3	12331	19.9	2215	0.3		1301	58731.2	2409	36.9	229	24.4
1302	3096.8	9433	4	447	0.3		1302	58747.7	3346	30.9	191	17.6
1303	3097.3	14698	18.1	2012	0.2		1303	58823.7	3017	70.7	438	19.5
1304	3097.7	8309	5.2	577	0.4		1304	58862	2880	4.6	28	20.4
1305	3098.3	12599	13.8	1541	0.2		1305	58903.9	2565	20.7	128	23
1306	3098.8	7160	4.9	542	0.4		1306	58925.2	2903	17	105	20.3
1307	3099.3	13421	11.2	1243	0.2		1307	58945.7	4463	12.9	80	13.2
1308	3099.8	7814	3.2	359	0.4		1308	59013.7	3020	74.3	460	19.5
1309	3100.3	12452	7.6	849	0.2		1309	59084.5	3305	23.9	148	17.9
1310	3100.8	14316	3	340	0.2		1310	59106.7	2694	21.3	132	21.9
1311	3101.4	20000	133.9	14919	0.2		1311	59171.7	4520	26.8	166	13.1
1312	3101.9	17632	2.7	301	0.2		1312	59186.9	4728	17.3	107	12.5
1313	3102.4	19985	219.2	24422	0.2		1313	59205.8	5810	33.4	207	10.2
1314	3102.9	16877	4.5	504	0.2		1314	59226.9	5027	6.2	38	11.8
1315	3103.4	20370	207.1	23073	0.2		1315	59249.4	4172	14.2	88	14.2
1316	3103.9	17226	7.2	800	0.2		1316	59266.4	4052	22.6	140	14.6
1317	3104.4	20317	135.6	15110	0.2		1317	59284.3	3123	34	210	19
1318	3104.9	12885	6.2	690	0.2		1318	59291.2	2615	30.9	191	22.7
1319	3105.4	19897	70.5	7858	0.2		1319	59310.7	2607	23	142	22.8
1320	3105.9	11507	1.4	158	0.3		1320	59378.1	2714	21.7	135	21.9
1321	3106.4	15006	24.3	2712	0.2		1321	59415.7	6094	31.3	194	9.8
1322	3106.8	15584	5.5	610	0.2		1322	59441.7	3850	12.1	75	15.4
1323	3107.3	10468	13.4	1497	0.3		1323	59471.9	2919	21.3	132	20.4
1324	3108.2	13955	16.4	1827	0.2		1324	59501.1	4882	6.8	42	12.2
1325	3108.7	9329	2.1	239	0.3		1325	59515.3	4309	5.9	37	13.8
1326	3109.3	12153	12.1	1343	0.3		1326	59569.5	4015	63.6	393	14.8
1327	3110.2	19416	36.7	4089	0.2		1327	59605.7	3720	2.6	16	16
1328	3110.8	18622	6.5	727	0.2		1328	59674.9	6677	83.7	518	8.9
1329	3111.2	21172	50.9	5665	0.1		1329	59704.9	3130	30.8	191	19.1
1330	3111.8	17681	2.8	309	0.2		1330	59750.1	3913	28.3	175	15.3
1331	3112.3	19248	54	6020	0.2		1331	59829.9	4365	37.3	231	13.7
1332	3112.8	11462	10.8	1200	0.3		1332	59862	4258	16.2	100	14.1
1333	3113.2	16125	46	5128	0.2		1333	59907.8	4716	6.2	38	12.7
1334	3113.8	9139	10.6	1177	0.3		1334	59929.8	4446	22.8	141	13.5
1335	3114.2	16746	33.3	3713	0.2		1335	59975	3473	47.8	296	17.3
1336	3114.7	11281	4.8	533	0.3		1336	59994.4	3484	24.3	150	17.2
1337	3115.2	17786	22	2447	0.2		1337	60062.3	3856	17.7	110	15.6
1338	3115.6	13273	3.2	358	0.2		1338	60089.6	3895	10.1	62	15.4
1339	3116.2	15975	19.8	2205	0.2		1339	60106.8	2985	4.3	27	20.1
1340	3116.7	7578	7	777	0.4		1340	60159.2	3122	46.7	289	19.3
1341	3117.3	12973	16.7	1856	0.2		1341	60193.9	5765	311.2	1926	10.4
1342	3117.7	10457	7	782	0.3		1342	60234.2	4633	37.8	234	13
1343	3118.2	11363	12.3	1366	0.3		1343	60283.6	4122	43.3	268	14.6
1344	3119.3	10764	7.6	842	0.3		1344	60314.4	3194	19.4	120	18.9
1345	3120.3	13958	8.1	905	0.2		1345	60340.8	3470	41.2	255	17.4
1346	3121.6	6937	22.2	2468	0.4		1346	60376.1	3715	5.6	34	16.3
1347	3122.2	8326	26.1	2908	0.4		1347	60407.7	3306	8.1	50	18.3
1348	3123	9330	17.6	1961	0.3		1348	60433	4526	25.8	159	13.4
1349	3123.3	8405	24.3	2702	0.4		1349	60457.6	4580	11	68	13.2
1350	3123.9	9130	8.5	949	0.3		1350	60500.2	3434	19.4	120	17.6
1351	3124.3	9870	17.2	1913	0.3		1351	60560.1	2742	12.1	75	22.1
1352	3125.3	11916	14.2	1587	0.3		1352	60590.9	4434	28.6	177	13.7
1353	3126.3	10254	11.4	1269	0.3		1353	60651.4	3455	139.8	865	17.6
1354	3127.3	5186	11.3	1259	0.6		1354	60685.3	3160	22.4	139	19.2
1355	3128.3	8602	10.6	1175	0.4		1355	60711.9	4395	12.1	75	13.8
1356	3128.7	8532	4.6	518	0.4		1356	60733.1	5339	27	167	11.4
1357	3129.2	8284	6.4	712	0.4		1357	60751.5	5341	14.6	90	11.4
1358	3130.3	8532	7.6	851	0.4		1358	60759.2	5041	14.3	88	12.1
1359	3130.7	6901	8.6	952	0.5		1359	60786.8	3885	4.4	27	15.6
1360	3131.3	4492	9.6	1071	0.7		1360	60834.3	2525	35.8	221	24.1
1361	3131.8	5568	6.6	738	0.6		1361	60876.1	2383	14	86	25.6
1362	3132.2	9216	9.6	1072	0.3		1362	60893.7	5353	8.8	54	11.4
1363	3132.7	9194	3.9	433	0.3		1363	60929.6	4463	21	130	13.7
1364	3133.2	16499	10.6	1185	0.2		1364	60961.8	3082	21.7	134	19.8
1365	3133.7	10396	3.3	371	0.3		1365	60968.3	5055	22.1	137	12.1
1366	3134.2	17743	10.5	1167	0.2		1366	60987.2	4080	11	68	14.9
1367	3134.8	9265	4.1	454	0.3		1367	61020.3	3691	5	31	16.5
1368	3135.2	11358	13.7	1530	0.3		1368	61058.6	2887	29.1	180	21.2
1369	3136.3	5917	22.2	2475	0.5		1369	61086.4	2121	31.1	192	28.8
1370	3137.3	7938	22.5	2507	0.4		1370	61106.8	3618	46.1	286	16.9
1371	3137.7	8623	6.6	734	0.4		1371	61159.2	4502	12.6	78	13.6
1372	3138.4	16502	27.9	3110	0.2		1372	61179.3	5305	5.2	32	11.5
1373	3138.9	9379	2.7	303	0.3		1373	61201	6772	10.4	64	9
1374	3139.4	15867	24.7	2747	0.2		1374	61223.8	4608	15	93	13.3
1375	3140.4	12153	26.1	2908	0.3		1375	61245.9	2473	25.6	158	24.8
1376	3141.3	8902	20.1	2240	0.4		1376	61270.4	4368	37.7	233	14
1377	3142.4	19390	48.3	5380	0.2		1377	61292.5	4715	11	68	13
1378	3143.4	20511	84.2	9383	0.2		1378	61322.8	2682	38.4	238	22.9
1379	3143.9	19118	1.6	180	0.2		1379	61336.1	3164	46.3	286	19.4
1380	3144.4	20956	70.8	7883	0.2		1380	61383.1	3548	14.7	91	17.3
1381	3144.9	16453	2.5	284	0.2		1381	61408.8	4356	8.3	51	14.1
1382	3145.4	18379	65.6	7312	0.2		1382	61438.7	2695	15	93	22.8
1383	3146	12720	3.1	344	0.2		1383	61452.7	4202	12.2	75	14.6
1384	3146.4	18593	30.3	3380	0.2		1384	61486	3026	75.8	469	20.3
1385	3147.4	16148	18.4	2045	0.2		1385	61522.1	3661	17.1	106	16.8
1386	3148.4	12072	6.6	735	0.3		1386	61569.4	3684	45.9	284	16.7
1387	3149.5	7607	11.8	1319	0.4		1387	61599.8	5546	24.5	151	11.1
1388	3150.2	6050	11.1	1238	0.5		1388	61612.6	6894	10.5	65	8.9
1389	3151.2	6968	6.1	678	0.5		1389	61621.3	4958	14	87	12.4
1390	3152.2	15134	5.8	645	0.2		1390	61642.6	3780	6.7	41	16.3
1391	3152.7	6354	2.1	231	0.5		1391	61667.9	3282	13.3	82	18.8
1392	3153.3	9044	5	556	0.3		1392	61691.9	3434	31.6	196	18
1393	3153.8	13156	4.7	522	0.2		1393	61706	4750	29.5	183	13
1394	3154.4	19155	103.4	11518	0.2		1394	61735.6	2675	11.2	69	23.1
1395	3154.9	15857	2.5	282	0.2		1395	61762.9	3580	73	452	17.3
1396	3155.4	19473	190.6	21237	0.2		1396	61829.2	3459	6.3	39	17.9
1397	3155.9	19100	0.8	87	0.2		1397	61851.5	4994	12.4	77	12.4
1398	3156.4	21473	146.8	16349	0.1		1398	61882.5	2708	20.2	125	22.9
1399	3156.9	20895	0.6	72	0.2		1399	61921.1	7621	5.1	31	8.1
1400	3157.4	21164	99.8	11115	0.1		1400	61945.9	4964	9.1	56	12.5
1401	3158.4	18815	52.8	5882	0.2		1401	61970.6	3453	9	55	17.9
1402	3158.9	12802	1.7	184	0.2		1402	61987	4015	5.8	36	15.4
1403	3159.4	16961	29.3	3261	0.2		1403	62019	2468	27.1	168	25.1
1404	3159.9	11472	1.1	121	0.3		1404	62039.5	3972	31.4	195	15.6
1405	3160.4	15796	19.4	2163	0.2		1405	62104.7	3340	42.1	261	18.6
1406	3161.4	13911	11.5	1276	0.2		1406	62136.8	4803	46.9	290	12.9
1407	3161.9	12058	1.4	158	0.3		1407	62167.6	5686	7.9	49	10.9
1408	3162.3	12202	8.6	956	0.3		1408	62190	7043	113.4	702	8.8
1409	3162.8	11774	4.8	532	0.3		1409	62229.7	3495	13.3	83	17.8
1410	3163.3	9165	9.2	1024	0.3		1410	62291.9	3095	80.7	499	20.1
1411	3164.2	10250	7	785	0.3		1411	62369.3	3452	37.2	230	18.1
1412	3165.3	5967	3.2	360	0.5		1412	62401	4042	23.4	145	15.4
1413	3166.3	10327	4.8	536	0.3		1413	62411.4	3629	23.1	143	17.2
1414	3167.2	8728	5.8	642	0.4		1414	62480.3	5643	100.8	624	11.1
1415	3168.2	6644	4.8	533	0.5		1415	62521.6	3078	8.7	54	20.3
1416	3168.8	15380	3.1	344	0.2		1416	62552.4	4277	64.8	401	14.6
1417	3169.2	13357	6.8	753	0.2		1417	62572.5	3578	45.8	283	17.5
1418	3169.6	12037	5.3	589	0.3		1418	62629	4705	30.1	186	13.3
1419	3170.2	12999	6.7	750	0.2		1419	62673.2	5510	23.3	144	11.4
1420	3170.5	9076	3.4	375	0.3		1420	62691	3261	21.9	135	19.2
1421	3171.3	8390	5.4	603	0.4		1421	62715.1	2969	9.3	58	21.1
1422	3172.2	12678	4	445	0.3		1422	62744.1	3025	9.1	56	20.7
1423	3172.6	15025	3.4	383	0.2		1423	62775.6	4545	35.4	219	13.8
1424	3173.5	13078	7.1	795	0.2		1424	62833.1	2974	16.4	102	21.1
1425	3174	10022	1.6	182	0.3		1425	62856.1	3577	25.1	155	17.6
1426	3174.5	17052	11.4	1269	0.2		1426	62927.4	3114	35.2	218	20.2
1427	3175.5	15907	12	1337	0.2		1427	62946.3	3234	28.9	179	19.5
1428	3176.4	18112	20.1	2236	0.2		1428	62974.9	2810	23.9	148	22.4
1429	3176.9	17063	1.5	163	0.2		1429	62999.9	2585	9	56	24.4
1430	3177.5	21578	90.7	10105	0.1		1430	63012.6	4562	6.6	41	13.8
1431	3178.4	17846	28.2	3145	0.2		1431	63068.1	3760	55.4	343	16.8
1432	3178.8	23484	91.1	10145	0.1		1432	63116.4	4405	1.9	12	14.3
1433	3179.4	15712	29.6	3302	0.2		1433	63144.3	6476	5.4	33	9.8
1434	3180.2	19570	78.1	8704	0.2		1434	63154.4	4888	8.7	54	12.9
1435	3180.8	13822	1.8	204	0.2		1435	63175.2	5287	11.4	71	12
1436	3181.5	17727	35.2	3922	0.2		1436	63218.3	4323	6.7	41	14.6
1437	3182.3	11496	9.3	1035	0.3		1437	63243.4	4175	21.9	135	15.1
1438	3182.8	16823	5.8	646	0.2		1438	63306.1	4583	210.9	1305	13.8
1439	3183.4	9049	5.8	651	0.4		1439	63325.3	3559	174.2	1078	17.8
1440	3184.2	15535	10.5	1166	0.2		1440	63359.2	3899	117.4	726	16.2
1441	3184.6	12059	3.5	391	0.3		1441	63404.8	4107	19	118	15.4
1442	3185.2	14347	3.9	435	0.2		1442	63431.2	3903	16.4	102	16.3
1443	3185.5	11524	2.3	253	0.3		1443	63454.8	4443	40.2	249	14.3
1444	3186.2	15744	4.1	462	0.2		1444	63529	3977	133.9	828	16
1445	3186.6	11803	2.3	254	0.3		1445	63547	7179	74.3	460	8.9
1446	3187.3	10525	4.2	466	0.3		1446	63602.6	3331	15.7	97	19.1
1447	3188.2	12918	5	560	0.2		1447	63622	3858	9	55	16.5
1448	3189.2	14866	5.7	641	0.2		1448	63648.2	3319	5	31	19.2
1449	3189.6	10024	1.6	177	0.3		1449	63669.8	3908	7.5	46	16.3
1450	3190.2	21318	21.7	2415	0.1		1450	63721.2	3334	47.4	293	19.1
1451	3190.6	17340	2.6	294	0.2		1451	63766.3	3770	12	74	16.9
1452	3191.2	20250	40.2	4483	0.2		1452	63811	3927	9	56	16.3
1453	3191.7	14663	2	226	0.2		1453	63825.3	4910	11.6	72	13
1454	3192.2	17011	39.3	4376	0.2		1454	63835.4	3274	11.8	73	19.5
1455	3192.7	14912	2.5	280	0.2		1455	63932.5	4198	415.9	2574	15.2
1456	3193.3	15233	25.9	2889	0.2		1456	63990.5	2813	9.8	61	22.8
1457	3194.3	14912	15.6	1740	0.2		1457	64020.3	6085	32	198	10.5
1458	3194.8	14786	1.5	166	0.2		1458	64055.8	2389	5.7	36	26.8
1459	3195.3	13847	7.8	870	0.2		1459	64117.4	3056	53.9	334	21
1460	3196.3	9176	4.9	547	0.3		1460	64140.2	7264	50.8	314	8.8
1461	3197.4	17695	42.4	4721	0.2		1461	64162.7	5464	10.2	63	11.7
1462	3198	15404	2.1	238	0.2		1462	64206.5	4439	303.9	1881	14.5
1463	3198.4	19353	56	6236	0.2		1463	64253	4690	12.2	76	13.7
1464	3199.4	19888	58.3	6499	0.2		1464	64286.3	4185	15.9	98	15.4
1465	3200.4	12633	33.3	3713	0.3		1465	64327.3	3095	55.9	346	20.8
1466	3201.4	11598	23.7	2638	0.3		1466	64350	3063	43.8	271	21
1467	3202.3	10713	15.6	1742	0.3		1467	64371.8	6602	11.5	71	9.8
1468	3203.3	10384	10.3	1142	0.3		1468	64383.3	5418	10.6	66	11.9
1469	3203.8	17125	2.4	272	0.2		1469	64412.3	4840	167.8	1039	13.3
1470	3204.3	9937	8.5	950	0.3		1470	64469.7	5543	6.2	39	11.6
1471	3205.2	12268	5.4	597	0.3		1471	64481.7	5669	2.9	18	11.4
1472	3205.6	14203	5.6	624	0.2		1472	64510.1	2941	22.3	138	21.9
1473	3206.2	8362	4.7	523	0.4		1473	64605.2	2851	70.4	436	22.7
1474	3206.8	12730	2.3	257	0.3		1474	64701.5	2788	42.2	261	23.2
1475	3207.4	10354	4.6	511	0.3		1475	64716.7	5689	32.7	202	11.4
1476	3208.2	12257	12.3	1369	0.3		1476	64748.4	4194	6.3	39	15.4
1477	3209.3	14150	16.1	1792	0.2		1477	64796.4	2980	33.8	209	21.7
1478	3210.2	14400	15.5	1723	0.2		1478	64853.1	7256	11.2	69	8.9
1479	3210.6	9026	6.2	691	0.4		1479	64891.1	3606	124.7	772	18
1480	3211.2	13966	18.4	2053	0.2		1480	64924.6	3196	14.3	88	20.3
1481	3211.6	11656	8.3	920	0.3		1481	64946.8	2974	21.7	134	21.8
1482	3212.2	11354	14.9	1656	0.3		1482	64981.7	3146	41.6	258	20.7
1483	3213.2	13610	12	1334	0.2		1483	65022.8	3463	30.6	189	18.8
1484	3214.2	14331	8.5	943	0.2		1484	65051.9	3967	23.5	146	16.4
1485	3215.2	13378	8.3	925	0.2		1485	65080.8	4332	25.8	159	15
1486	3216.2	13729	6.5	728	0.2		1486	65104.1	4243	45	278	15.3
1487	3217.3	9961	5.2	576	0.3		1487	65126.9	3744	33.9	210	17.4
1488	3218.2	9240	4.3	475	0.3		1488	65148.9	7002	70.6	437	9.3
1489	3219.4	9354	5.9	658	0.3		1489	65196.3	4008	48	297	16.3
1490	3220.4	16840	10.8	1207	0.2		1490	65246.1	3537	78.2	484	18.4
1491	3221.4	10331	10.4	1160	0.3		1491	65294.2	3653	19.4	120	17.9
1492	3222.3	6958	11.6	1293	0.5		1492	65347.1	3446	1.8	11	19
1493	3223.2	9063	11.3	1261	0.4		1493	65392.4	5683	2.5	16	11.5
1494	3224.2	12589	8.2	913	0.3		1494	65406.9	3659	2.8	18	17.9
1495	3225.3	4958	7.2	800	0.7		1495	65412.7	5751	2.8	17	11.4
1496	3225.8	7820	6.3	706	0.4		1496	65423.5	6710	2.4	15	9.8
1497	3226.2	6273	9.5	1061	0.5		1497	65448.2	3279	22.9	142	20
1498	3227.3	6522	5.2	582	0.5		1498	65475	3379	73.6	456	19.4
1499	3228.1	8124	4.2	464	0.4		1499	65536.1	3666	37.7	234	17.9
1500	3229.2	13966	4	448	0.2		1500	65551.1	6968	30.7	190	9.4
1501	3229.6	14351	4.8	538	0.2		1501	65567	3971	18	111	16.5
1502	3230.2	14266	5.5	611	0.2		1502	65592.1	4994	8.6	53	13.1
1503	3230.6	16406	8	893	0.2		1503	65677.8	3642	103.3	639	18
1504	3231.2	16303	3.4	383	0.2		1504	65717.6	5055	21.7	134	13
1505	3231.5	18678	11.8	1312	0.2		1505	65752.2	5780	42.5	263	11.4
1506	3232.2	17303	3.7	413	0.2		1506	65773.6	2935	133	823	22.4
1507	3232.6	19345	13.1	1460	0.2		1507	65818.8	3933	21.2	131	16.7
1508	3233.2	15618	4.7	522	0.2		1508	65846.5	3679	20.4	127	17.9
1509	3233.6	18404	10.8	1200	0.2		1509	65874.6	4054	186.3	1153	16.3
1510	3234.2	17386	5.4	605	0.2		1510	65921.1	3688	5.5	34	17.9
1511	3234.6	17752	5.5	616	0.2		1511	65971.7	3005	148.6	919	22
1512	3235.2	14775	4.2	469	0.2		1512	66033.3	6773	1.9	12	9.8
1513	3235.5	14486	4	447	0.2		1513	66049.1	4151	3.7	23	15.9
1514	3236.2	15438	4.7	526	0.2		1514	66073	4551	26.1	161	14.5
1515	3237.2	11186	2.9	322	0.3		1515	66094	4927	34.3	212	13.4
1516	3237.4	10373	2.9	322	0.3		1516	66112.8	7266	5.9	37	9.1
1517	3238.2	11654	4	451	0.3		1517	66171.6	4563	81.1	502	14.5
1518	3239.2	9549	3.9	432	0.3		1518	66193.1	5819	11.3	70	11.4
1519	3240.2	13735	5	560	0.2		1519	66201.7	4989	10.7	66	13.3
1520	3241.1	18220	6.8	753	0.2		1520	66274	5038	30.2	187	13.2
1521	3241.6	15351	4.2	468	0.2		1521	66296.5	3439	34.8	215	19.3
1522	3242.2	15562	7.9	878	0.2		1522	66310.3	6888	21.7	134	9.6
1523	3243.1	20291	34.6	3858	0.2		1523	66331.6	5443	6.6	41	12.2
1524	3243.6	17152	2.4	269	0.2		1524	66345.8	4854	8	49	13.7
1525	3244.1	20059	49.5	5509	0.2		1525	66376.8	3235	50.8	314	20.5
1526	3244.6	17507	10.2	1131	0.2		1526	66424.2	3183	2.8	17	20.9
1527	3245.1	19346	45.7	5093	0.2		1527	66449.4	3992	4.2	26	16.6
1528	3245.6	16150	15.9	1775	0.2		1528	66459.7	5931	3.5	21	11.2
1529	3246.1	18374	30.2	3369	0.2		1529	66474.6	2793	6.1	38	23.8
1530	3246.5	18468	15.7	1750	0.2		1530	66499.2	3491	5.1	31	19
1531	3247.1	19218	15.9	1769	0.2		1531	66510.5	4252	5.1	32	15.6
1532	3247.5	18684	10.8	1207	0.2		1532	66578.7	4926	57.2	354	13.5
1533	3248.2	18527	10.1	1124	0.2		1533	66646.5	6836	1646.1	10186	9.8
1534	3248.5	17008	8.4	941	0.2		1534	66691.9	2837	567.6	3513	23.5
1535	3249.1	15181	6	672	0.2		1535	66721.5	4322	43.3	268	15.4
1536	3249.6	13479	6.7	749	0.2		1536	66747.8	5134	40.6	251	13
1537	3250.2	11782	2.4	267	0.3		1537	66802.2	2926	13.7	85	22.8
1538	3250.5	14697	3.8	418	0.2		1538	66827.6	6854	5.4	33	9.8
1539	3251.4	10602	2.8	309	0.3		1539	66847.7	3715	15.1	93	18
1540	3252.2	14038	5.5	611	0.2		1540	66884	5336	90.5	560	12.5
1541	3253.2	17544	7.8	870	0.2		1541	66915.4	4118	30.8	191	16.3
1542	3253.5	15839	5.9	660	0.2		1542	66981.2	4339	17.4	107	15.4
1543	3254.2	14994	8.4	931	0.2		1543	67051.5	3185	18.3	113	21.1
1544	3255.1	15553	11	1229	0.2		1544	67079.3	5150	16.9	105	13
1545	3256.3	9857	4.6	516	0.3		1545	67101.5	6559	10.4	64	10.2
1546	3257.2	17001	7.7	859	0.2		1546	67123.5	6805	10.7	66	9.9
1547	3257.5	14757	6.6	739	0.2		1547	67170.5	4090	11.3	70	16.4
1548	3258.2	16666	12.8	1427	0.2		1548	67202	3308	6	37	20.3
1549	3259.2	17268	8.6	955	0.2		1549	67233.3	4048	7	43	16.6
1550	3259.5	18175	6	674	0.2		1550	67284	4358	23.1	143	15.4
1551	3260.2	17786	9.1	1017	0.2		1551	67301	5682	24.1	149	11.8
1552	3260.6	15739	2.5	274	0.2		1552	67338.7	4901	12.9	80	13.7
1553	3261.2	16708	7.6	844	0.2		1553	67345.7	4501	14.5	90	15
1554	3261.6	14956	8.9	994	0.2		1554	67374.6	5077	20	123	13.3
1555	3262.1	14955	9.3	1040	0.2		1555	67411.1	4730	50.7	314	14.3
1556	3262.5	15592	17.7	1971	0.2		1556	67443.4	3333	39.9	247	20.2
1557	3263.1	16332	10.3	1142	0.2		1557	67478.1	3611	355.4	2199	18.7
1558	3263.6	17149	6.8	753	0.2		1558	67569.2	4281	162.7	1007	15.8
1559	3264	16875	14.8	1651	0.2		1559	67615.7	3491	16	99	19.4
1560	3264.5	12583	4.2	466	0.3		1560	67652.3	4898	18.9	117	13.8
1561	3265.5	17351	14.8	1652	0.2		1561	67686.1	2975	14.9	92	22.8
1562	3266.2	15765	8.4	936	0.2		1562	67719.1	5209	6.1	38	13
1563	3266.5	8462	3.3	369	0.4		1563	67750.3	4065	40	248	16.7
1564	3267.1	14099	9.9	1104	0.2		1564	67773.6	6416	17.3	107	10.6
1565	3267.5	12095	4.8	539	0.3		1565	67784.8	3792	26.8	166	17.9
1566	3268.1	11462	8	892	0.3		1566	67856.7	4176	29.6	183	16.3
1567	3268.5	10415	7.1	788	0.3		1567	67869.4	4025	28.8	178	16.9
1568	3269.1	11496	9.2	1020	0.3		1568	67923.1	3561	4.7	29	19.1
1569	3269.6	8769	8.7	973	0.4		1569	67966.4	5975	14.8	92	11.4
1570	3270.2	12214	17	1891	0.3		1570	67970.9	7605	15	93	8.9
1571	3270.6	7604	10.1	1129	0.4		1571	67986.4	3002	26.7	165	22.6
1572	3272.3	7933	252.6	28143	0.4		1572	68015.2	5232	8.4	52	13
1573	3272.6	7934	273.1	30419	0.4		1573	68087.8	6623	246.6	1526	10.3
1574	3275.2	5964	17.1	1905	0.5		1574	68109.6	7150	53.1	328	9.5
1575	3275.6	8735	15.9	1772	0.4		1575	68166.6	4018	112.9	699	17
1576	3276.2	7009	27.2	3032	0.5		1576	68187.7	5995	49.8	308	11.4
1577	3276.6	7281	18.9	2106	0.4		1577	68227.1	4940	44.2	273	13.8
1578	3277.2	6909	27.4	3048	0.5		1578	68250.3	4941	22.3	138	13.8
1579	3277.6	5774	24.4	2719	0.6		1579	68274.3	3232	19.7	122	21.1
1580	3278.2	7344	24.5	2728	0.4		1580	68319.7	3069	95.1	589	22.3
1581	3279.1	11577	25.7	2859	0.3		1581	68346.7	2718	72.1	446	25.1
1582	3279.6	7950	10.6	1179	0.4		1582	68378.8	6011	10.4	64	11.4
1583	3280.3	10073	24.8	2762	0.3		1583	68408.7	3615	66.5	411	18.9
1584	3281.2	12954	18.2	2025	0.3		1584	68434.7	3509	30.4	188	19.5
1585	3281.7	14411	19.7	2192	0.2		1585	68446.5	5124	29	179	13.4
1586	3282.2	9509	15.3	1704	0.3		1586	68498.7	4154	97.3	602	16.5
1587	3282.7	7295	12.7	1413	0.4		1587	68548.8	3235	7.1	44	21.2
1588	3283.1	7125	19.8	2203	0.5		1588	68580.9	3550	4	25	19.3
1589	3283.5	6242	15.1	1686	0.5		1589	68607	3838	17.8	110	17.9
1590	3284.1	5952	10.3	1147	0.6		1590	68630.5	4075	21.4	132	16.8
1591	3285.1	9926	6	668	0.3		1591	68639.7	4848	17	105	14.2
1592	3285.5	6968	8.3	927	0.5		1592	68660.3	3364	18.4	114	20.4
1593	3286.5	5549	11.5	1276	0.6		1593	68720.7	3831	132.7	821	17.9
1594	3287.1	5832	8.9	996	0.6		1594	68809.3	2630	39.3	243	26.2
1595	3287.5	11845	11.4	1265	0.3		1595	68865.7	6054	5.9	36	11.4
1596	3288.1	11738	6.2	686	0.3		1596	68924	3057	77.9	482	22.5
1597	3288.5	13835	6.6	730	0.2		1597	68968.5	84884	17.9	111	0.8
1598	3289.2	14590	7.6	843	0.2		1598	69014.2	3935	24.5	151	17.5
1599	3289.5	11863	8	887	0.3		1599	69048.9	5388	63.9	396	12.8
1600	3290.2	8761	10.1	1124	0.4		1600	69076	7304	54.8	339	9.5
1601	3290.5	8680	10.3	1149	0.4		1601	69098.7	4271	30.5	189	16.2
1602	3290.9	13571	7.3	812	0.2		1602	69118.6	3370	36.5	226	20.5
1603	3291.4	16024	30.7	3424	0.2		1603	69144.7	3991	70.7	437	17.3
1604	3292.2	15319	6.4	715	0.2		1604	69174.9	3406	15.7	97	20.3
1605	3292.5	13882	5.2	584	0.2		1605	69195.7	4788	13.9	86	14.5
1606	3293.5	18951	29.2	3249	0.2		1606	69219	4219	40.9	253	16.4
1607	3294.2	14427	5.6	619	0.2		1607	69276.9	6238	10.3	64	11.1
1608	3294.5	10039	2.8	309	0.3		1608	69310.7	3281	212.1	1313	21.1
1609	3295.1	15264	3.5	392	0.2		1609	69418.6	3418	15	93	20.3
1610	3295.5	19495	35.4	3947	0.2		1610	69429.2	4747	12.7	79	14.6
1611	3296.2	10625	8.5	951	0.3		1611	69499.5	2784	67	415	25
1612	3296.6	6475	7.8	864	0.5		1612	69535.1	4831	266.1	1647	14.4
1613	3297.1	7588	10.7	1190	0.4		1613	69553.9	5036	128.6	796	13.8
1614	3297.5	14198	26.9	2997	0.2		1614	69566.3	4757	116.5	721	14.6
1615	3298.1	5894	7.2	803	0.6		1615	69583.3	3240	119.9	742	21.5
1616	3299.2	9996	4.3	484	0.3		1616	69636	4761	2.9	18	14.6
1617	3299.5	14323	6.3	701	0.2		1617	69664.4	3511	2	12	19.8
1618	3300.2	10198	5.1	570	0.3		1618	69779.4	2844	69.9	433	24.5
1619	3300.5	10055	4.5	504	0.3		1619	69805.4	2685	107.3	664	26
1620	3301.1	14510	5	553	0.2		1620	69830.3	3438	124.8	772	20.3
1621	3301.6	16045	10.4	1161	0.2		1621	69846.1	4109	129	798	17
1622	3302.4	7900	9.2	1023	0.4		1622	69877.1	2419	49.7	308	28.9
1623	3303.1	16393	20.6	2296	0.2		1623	69905.2	2852	28	173	24.5
1624	3303.6	12520	7.7	855	0.3		1624	69934.3	4193	8.3	51	16.7
1625	3303.9	12444	8.3	926	0.3		1625	69965.3	4735	13	80	14.8
1626	3304.5	12420	13.1	1462	0.3		1626	69996.3	4543	1.9	12	15.4
1627	3305.2	7579	4.7	522	0.4		1627	70085.7	5955	352.6	2182	11.8
1628	3305.7	15959	6.4	715	0.2		1628	70154.5	4638	37	229	15.1
1629	3306.3	7075	4.6	515	0.5		1629	70181.4	3926	53.1	328	17.9
1630	3307.1	14797	6.9	774	0.2		1630	70206.8	5401	43.8	271	13
1631	3307.6	14225	4.2	467	0.2		1631	70236.6	2701	14.8	91	26
1632	3308.2	17153	7.2	799	0.2		1632	70261.5	3523	28.3	175	19.9
1633	3308.7	13665	2.4	265	0.2		1633	70316.6	3606	15.2	94	19.5
1634	3309.3	7038	4	442	0.5		1634	70331	4532	12	74	15.5
1635	3310.1	14732	8.2	912	0.2		1635	70367.8	3690	49.5	306	19.1
1636	3310.5	14155	6.7	747	0.2		1636	70425.5	4467	13.4	83	15.8
1637	3311.2	15405	8.2	914	0.2		1637	70446.6	5419	5.7	35	13
1638	3311.7	13021	2.8	312	0.3		1638	70475.9	4465	65.1	403	15.8
1639	3312.2	13959	4.7	527	0.2		1639	70504.7	4221	40.2	248	16.7
1640	3313.2	16634	6.5	726	0.2		1640	70524.2	7233	11.8	73	9.8
1641	3313.6	14890	6.1	676	0.2		1641	70535.3	3946	13.9	86	17.9
1642	3314.2	15301	6.4	710	0.2		1642	70599	2896	247.3	1530	24.4
1643	3314.5	11987	2.7	301	0.3		1643	70691.7	4287	88	545	16.5
1644	3315.1	11415	5.3	592	0.3		1644	70761.7	3377	12.7	79	21
1645	3317	8041	45.5	5068	0.4		1645	70786.9	3344	37.8	234	21.2
1646	3317.5	5727	43	4793	0.6		1646	70866.7	3573	27.8	172	19.8
1647	3318	9831	31.3	3484	0.3		1647	70915.6	6256	93	575	11.3
1648	3319	7055	6.6	733	0.5		1648	70941.6	3889	10.9	67	18.2
1649	3319.5	10457	8.8	981	0.3		1649	70968.2	5459	8.9	55	13
1650	3320.2	9474	6	668	0.4		1650	71001	3028	27.1	168	23.4
1651	3320.4	9348	5.3	588	0.4		1651	71032.6	4011	43.6	270	17.7
1652	3321.2	12664	9.9	1102	0.3		1652	71046.4	6719	32.3	200	10.6
1653	3321.6	8925	7.2	802	0.4		1653	71083	3977	33.3	206	17.9
1654	3322.1	10660	11.6	1292	0.3		1654	71110.6	5148	10.9	67	13.8
1655	3322.6	8078	8.4	937	0.4		1655	71140.6	3807	59.8	370	18.7
1656	3323.1	15402	22.2	2477	0.2		1656	71195	5277	50.1	310	13.5
1657	3323.6	13915	11.3	1258	0.2		1657	71230.5	6262	13.8	85	11.4
1658	3324.1	17283	22.7	2534	0.2		1658	71240.1	3488	14.5	89	20.4
1659	3324.6	14630	6.1	675	0.2		1659	71268	3410	20.4	126	20.9
1660	3325.1	19050	17.8	1984	0.2		1660	71304.2	4179	27.7	172	17.1
1661	3325.6	17314	7.1	796	0.2		1661	71340	3377	125.3	776	21.1
1662	3326.1	17160	14.9	1657	0.2		1662	71350.6	4797	104.2	645	14.9
1663	3326.6	11335	7.8	869	0.3		1663	71407	2219	20.9	129	32.2
1664	3327.1	12848	12.5	1396	0.3		1664	71429.9	2779	34.7	215	25.7
1665	3327.6	12092	10.2	1131	0.3		1665	71457.7	3954	45.5	281	18.1
1666	3328.1	10787	7.3	815	0.3		1666	71490.3	3064	42.1	261	23.3
1667	3328.5	12349	5.5	618	0.3		1667	71510.4	4289	55.8	345	16.7
1668	3329.1	13313	5.7	638	0.3		1668	71571.3	3041	16.5	102	23.5
1669	3329.7	6685	4.6	517	0.5		1669	71621.3	2765	10	62	25.9
1670	3330.3	7878	4.6	510	0.4		1670	71646.7	2425	11.6	72	29.5
1671	3331	7275	7.7	852	0.5		1671	71678.3	4302	38.4	238	16.7
1672	3331.6	8960	25	2789	0.4		1672	71710.3	4645	5.7	35	15.4
1673	3332.2	8078	40.6	4522	0.4		1673	71734.8	4647	16.1	100	15.4
1674	3333	11110	35.4	3941	0.3		1674	71760.6	3397	31.9	197	21.1
1675	3333.5	7920	25.4	2834	0.4		1675	71785.3	4282	50.3	311	16.8
1676	3334.1	7864	13.1	1458	0.4		1676	71812.5	4102	20.6	127	17.5
1677	3334.6	9824	7.3	816	0.3		1677	71837.9	5160	29.9	185	13.9
1678	3335.1	13397	8.9	990	0.2		1678	71857.5	4422	20.9	129	16.3
1679	3335.6	10900	8.3	924	0.3		1679	71893.8	3675	13.4	83	19.6
1680	3336.2	8575	17.2	1914	0.4		1680	71909.1	3454	13	80	20.8
1681	3336.6	5678	25.4	2834	0.6		1681	71950.3	4338	9.1	56	16.6
1682	3337.1	5931	29.9	3336	0.6		1682	71973.9	3407	16.8	104	21.1
1683	3337.5	6933	30.6	3406	0.5		1683	71997.5	2690	24.3	150	26.8
1684	3339.1	6394	7.9	878	0.5		1684	72022	4029	56.3	348	17.9
1685	3339.5	14922	13.2	1465	0.2		1685	72034.6	5396	70.9	439	13.4
1686	3340.1	10292	7.3	816	0.3		1686	72058	5815	53	328	12.4
1687	3340.6	9914	8.6	963	0.3		1687	72073.7	5914	10.8	67	12.2
1688	3341.1	13883	9.9	1107	0.2		1688	72082.2	6052	10.5	65	11.9
1689	3341.6	8837	7.6	850	0.4		1689	72110.3	4217	20.6	127	17.1
1690	3342.1	13420	11.9	1324	0.2		1690	72162.6	5194	21.2	131	13.9
1691	3342.6	10063	10.3	1144	0.3		1691	72193.9	3681	43.1	267	19.6
1692	3343.1	11752	12	1337	0.3		1692	72219.1	3708	20.7	128	19.5
1693	3343.6	13399	10.4	1157	0.2		1693	72242.1	4446	9.1	56	16.3
1694	3344.1	15098	7.1	795	0.2		1694	72274.6	3812	44	272	19
1695	3344.6	11572	3.6	404	0.3		1695	72335.6	5237	743.7	4603	13.8
1696	3345.1	17921	6.8	757	0.2		1696	72346.7	4260	666.2	4123	17
1697	3345.6	14398	5.8	648	0.2		1697	72359.4	3738	503.8	3118	19.4
1698	3346.1	15105	5.6	626	0.2		1698	72463.8	3780	163.1	1010	19.2
1699	3346.6	14196	7	784	0.2		1699	72518.8	4522	5.6	34	16
1700	3347.1	13061	8.1	899	0.3		1700	72574.8	4498	133	823	16.1
1701	3347.6	14023	7	783	0.2		1701	72626.5	3234	8.6	53	22.5
1702	3348.1	12970	6.1	684	0.3		1702	72661.9	6388	17.3	107	11.4
1703	3348.6	9428	3.4	383	0.4		1703	72692.7	6191	45.4	281	11.7
1704	3349.1	15088	4.7	521	0.2		1704	72759.3	4722	14.8	91	15.4
1705	3349.5	10539	6.9	774	0.3		1705	72822.5	5443	199.2	1233	13.4
1706	3350.2	13015	7.6	841	0.3		1706	72883.7	4347	15.6	96	16.8
1707	3350.4	10917	7	775	0.3		1707	72901.3	3204	23.3	144	22.8
1708	3352.4	8434	43.7	4863	0.4		1708	72937.3	5611	8.1	50	13
1709	3352.7	8941	43.9	4886	0.4		1709	72956.6	4490	16.3	101	16.3
1710	3354.4	6648	9.1	1016	0.5		1710	72996.6	5285	29.7	184	13.8
1711	3355	9150	2.2	242	0.4		1711	73019.4	6189	58.3	361	11.8
1712	3355.6	12427	6.6	733	0.3		1712	73045.7	4773	15	93	15.3
1713	3356	6453	3.4	378	0.5		1713	73067.4	2783	6.6	41	26.3
1714	3356.6	8648	5.9	656	0.4		1714	73127	4091	39	242	17.9
1715	3357	9387	6.6	736	0.4		1715	73157.8	3631	44.2	274	20.1
1716	3358	7383	5.6	621	0.5		1716	73180.6	5004	30.4	188	14.6
1717	3358.6	9976	1	106	0.3		1717	73268.5	5010	20.5	127	14.6
1718	3359.2	13894	6.9	774	0.2		1718	73309.1	5013	110.8	685	14.6
1719	3360.2	15794	6.9	764	0.2		1719	73319.7	5640	106.1	657	13
1720	3360.5	11424	3	330	0.3		1720	73326.6	3716	101.8	630	19.7
1721	3361.1	14571	6.4	714	0.2		1721	73342.8	5465	66.4	411	13.4
1722	3361.6	13703	9.5	1056	0.2		1722	73400.2	4517	18.6	115	16.3
1723	3362.1	10445	6.4	712	0.3		1723	73416.3	4518	17.6	109	16.3
1724	3362.6	9250	7.5	841	0.4		1724	73424.4	3721	16.5	102	19.7
1725	3363.1	8092	7	783	0.4		1725	73468	5347	91	563	13.7
1726	3363.5	13639	8.5	944	0.2		1726	73474.9	4609	92.1	570	15.9
1727	3364.1	9245	6.2	694	0.4		1727	73537.5	5657	14.1	88	13
1728	3364.6	16219	8.5	952	0.2		1728	73580.4	3574	58.7	363	20.6
1729	3365.1	16678	7.2	805	0.2		1729	73608.3	3484	21.7	134	21.1
1730	3365.6	14931	6.8	761	0.2		1730	73661.3	5333	7.4	46	13.8
1731	3366.1	16989	6.2	691	0.2		1731	73692.1	3319	34.7	215	22.2
1732	3366.6	16298	4.9	546	0.2		1732	73717.4	2773	22.6	140	26.6
1733	3367.1	12937	4.6	512	0.3		1733	73757	3022	31.7	196	24.4
1734	3367.6	15855	4.4	488	0.2		1734	73777.3	3692	43	266	20
1735	3368.1	11531	3.8	422	0.3		1735	73800.6	4288	17.9	111	17.2
1736	3368.6	11930	3.4	378	0.3		1736	73843.7	3408	20.9	129	21.7
1737	3369.1	12679	4.8	539	0.3		1737	73898	5053	118.1	731	14.6
1738	3369.6	8328	4.6	511	0.4		1738	73921.6	4710	55.7	344	15.7
1739	3370.1	14582	5.2	577	0.2		1739	73944.6	5169	67.1	415	14.3
1740	3370.6	14796	5.6	622	0.2		1740	73970.4	5058	22	136	14.6
1741	3371.2	9569	6.4	709	0.4		1741	73983.7	5219	32	198	14.2
1742	3371.6	8160	10.7	1189	0.4		1742	74006.5	6008	100.6	623	12.3
1743	3372.5	6139	13.8	1539	0.5		1743	74032.6	5582	35.5	220	13.3
1744	3373.1	8437	9.7	1084	0.4		1744	74058.3	6338	17	105	11.7
1745	3373.6	10255	11.8	1313	0.3		1745	74122.4	5702	102.6	635	13
1746	3374	9665	2.9	323	0.3		1746	74140.5	4803	159.4	987	15.4
1747	3374.6	13043	5	552	0.3		1747	74199	4423	25.5	158	16.8
1748	3375.1	12510	6.2	694	0.3		1748	74225.8	3288	55.5	343	22.6
1749	3375.6	12739	7.9	884	0.3		1749	74260.6	3840	18.6	115	19.3
1750	3376.1	7343	8.5	944	0.5		1750	74336.4	4491	114	705	16.6
1751	3376.6	6636	13	1453	0.5		1751	74374.1	3727	29.2	181	20
1752	3377.1	8971	12.1	1345	0.4		1752	74388.2	5722	27.6	171	13
1753	3377.6	8374	9.3	1031	0.4		1753	74447.4	2830	32.1	198	26.3
1754	3378.1	8090	6.6	740	0.4		1754	74479.4	4886	37	229	15.2
1755	3378.5	7514	6	673	0.4		1755	74512.6	2633	21.1	131	28.3
1756	3379.1	5344	3.8	425	0.6		1756	74543.4	4385	17.2	106	17
1757	3379.6	11438	7.7	856	0.3		1757	74578.5	3148	87	539	23.7
1758	3380.1	9122	3.6	401	0.4		1758	74598.1	5122	45.1	279	14.6
1759	3380.5	12314	4.1	457	0.3		1759	74624	3402	23.1	143	21.9
1760	3381.1	11355	3	332	0.3		1760	74646.2	6562	16.4	102	11.4
1761	3381.6	13836	5.4	602	0.2		1761	74657	5538	17.7	110	13.5
1762	3382.1	8173	1.4	156	0.4		1762	74683.1	3886	15.8	98	19.2
1763	3382.6	10113	3.9	431	0.3		1763	74699.6	4082	19.9	123	18.3
1764	3383	9088	2.9	325	0.4		1764	74720.4	4840	11.6	72	15.4
1765	3383.5	15105	6.4	718	0.2		1765	74731.3	4841	12.2	75	15.4
1766	3384.1	12967	4.4	496	0.3		1766	74769.7	5413	37.6	233	13.8
1767	3384.6	7970	2.2	243	0.4		1767	74798.5	4937	48.7	301	15.1
1768	3385.1	18391	3.9	431	0.2		1768	74827.5	4300	49.4	306	17.4
1769	3385.6	15926	6.6	732	0.2		1769	74915.5	3845	110.2	682	19.5
1770	3386.2	12113	3.4	384	0.3		1770	74935.8	3032	197	1219	24.7
1771	3386.5	10425	2.7	295	0.3		1771	74968.4	3096	103.9	643	24.2
1772	3387.1	10674	4.5	497	0.3		1772	74995.2	6001	38.4	238	12.5
1773	3387.5	16087	6.4	718	0.2		1773	75021.8	6123	19.3	119	12.3
1774	3388.2	11655	3.6	402	0.3		1774	75053.5	4010	48.2	298	18.7
1775	3388.6	13444	2.3	254	0.3		1775	75105.3	2865	9.5	59	26.2
1776	3389.1	15372	3.8	428	0.2		1776	75165.2	4022	22.8	141	18.7
1777	3389.6	14562	6.6	738	0.2		1777	75190.9	2965	35.7	221	25.4
1778	3390.2	14141	4.4	489	0.2		1778	75291.6	5148	45.9	284	14.6
1779	3390.6	15385	4.9	543	0.2		1779	75342	4039	67.6	419	18.7
1780	3391	13538	2.7	301	0.3		1780	75374.9	8434	15.6	96	8.9
1781	3391.6	11891	8.1	898	0.3		1781	75402.9	4190	58.6	362	18
1782	3392.6	10883	8.8	979	0.3		1782	75410.4	4885	60.8	376	15.4
1783	3393	8927	4.5	498	0.4		1783	75521.4	5031	108.2	669	15
1784	3393.6	13029	4.9	544	0.3		1784	75538	3042	55.2	342	24.8
1785	3394	8790	2.9	319	0.4		1785	75567.1	8455	42.9	266	8.9
1786	3394.6	12682	1.8	201	0.3		1786	75655.6	3104	78.4	485	24.4
1787	3395.1	12740	3.4	380	0.3		1787	75741.5	4062	148.6	920	18.6
1788	3395.5	10942	2.7	305	0.3		1788	75808.9	5184	23	142	14.6
1789	3396.1	12618	5.4	598	0.3		1789	75822.4	4444	28.3	175	17.1
1790	3396.6	7863	5.3	587	0.4		1790	75831.5	3635	28	173	20.9
1791	3397	6827	6.7	746	0.5		1791	75865.7	3303	20.8	129	23
1792	3397.6	7054	7.4	828	0.5		1792	75912.7	7786	32.7	203	9.8
1793	3398.1	7082	4.8	529	0.5		1793	75921.7	3738	33.4	207	20.3
1794	3398.5	11178	5.7	632	0.3		1794	75951.5	4239	78.6	486	17.9
1795	3399.1	9191	3.9	436	0.4		1795	75982.7	3740	69.9	433	20.3
1796	3399.6	12761	3.6	405	0.3		1796	76007.1	3278	59.2	366	23.2
1797	3400.2	9139	3.3	371	0.4		1797	76034.6	4686	123.4	764	16.2
1798	3400.6	8917	5.3	596	0.4		1798	76097	4264	44.2	273	17.8
1799	3401.1	11387	5.1	571	0.3		1799	76117.1	5511	45.1	279	13.8
1800	3401.6	11998	5.5	611	0.3		1800	76147.4	3442	29.7	184	22.1
1801	3402.1	13149	4.4	488	0.3		1801	76236.6	2894	65.3	404	26.3
1802	3402.6	10545	3.2	355	0.3		1802	76263.5	3544	41.6	258	21.5
1803	3403	12601	3.4	382	0.3		1803	76357.4	4067	280	1733	18.8
1804	3403.6	15722	4.4	490	0.2		1804	76378.4	4011	128.9	798	19
1805	3404.1	15014	5.1	564	0.2		1805	76444	5167	88.4	547	14.8
1806	3404.6	16203	3.1	342	0.2		1806	76477.9	6213	132.3	819	12.3
1807	3405.1	15277	4.2	465	0.2		1807	76525.3	4540	17.8	110	16.9
1808	3405.6	17462	4.4	495	0.2		1808	76532.1	8752	17.8	110	8.7
1809	3406.1	13413	3.4	373	0.3		1809	76557.6	5000	60.7	376	15.3
1810	3406.8	14275	4.8	538	0.2		1810	76584.8	4164	53.4	331	18.4
1811	3407.6	15587	3.9	432	0.2		1811	76612.4	3681	34.7	215	20.8
1812	3408.2	18875	7.4	823	0.2		1812	76622.6	7254	26.1	162	10.6
1813	3408.6	17199	3.6	401	0.2		1813	76641.3	2651	35.3	218	28.9
1814	3409.1	16924	3.3	366	0.2		1814	76686.3	2697	23.6	146	28.4
1815	3409.6	19818	12.7	1413	0.2		1815	76724.3	3248	48.5	300	23.6
1816	3410.1	15632	5.7	634	0.2		1816	76759.6	3367	26.2	162	22.8
1817	3410.5	10648	3	335	0.3		1817	76797.9	5251	15.1	94	14.6
1818	3410.9	10656	4.7	524	0.3		1818	76815.7	3377	17.9	111	22.8
1819	3411.7	9273	9.1	1013	0.4		1819	76877	4389	251.6	1557	17.5
1820	3412.3	6071	14.9	1663	0.6		1820	76914.6	3641	35.1	217	21.1
1821	3413	5724	13.6	1519	0.6		1821	76941.5	5570	10.1	63	13.8
1822	3413.5	10519	13.2	1471	0.3		1822	76967.3	6485	22.4	139	11.9
1823	3414.1	14919	12.3	1372	0.2		1823	76996	5405	40.9	253	14.2
1824	3414.6	17106	8.5	947	0.2		1824	77020.7	3690	54	334	20.9
1825	3415.2	16570	9	1004	0.2		1825	77049.6	2974	15.5	96	25.9
1826	3415.7	12157	6.6	740	0.3		1826	77081.6	3150	23.6	146	24.5
1827	3416.4	11787	10.2	1139	0.3		1827	77112.9	3484	50	310	22.1
1828	3417	10338	7.8	874	0.3		1828	77144.1	5409	38.5	238	14.3
1829	3417.5	11974	8	889	0.3		1829	77165	3166	12.5	78	24.4
1830	3418.1	13193	6.5	728	0.3		1830	77199.2	3805	19.4	120	20.3
1831	3418.6	15094	8	887	0.2		1831	77228.4	3643	42.7	265	21.2
1832	3419.1	13388	4.8	534	0.3		1832	77253.3	3091	69.5	430	25
1833	3419.6	14269	6.3	700	0.2		1833	77281.3	4127	28.7	178	18.7
1834	3420.2	7898	3.1	350	0.4		1834	77317.8	5948	12.5	77	13
1835	3420.6	14229	4.4	493	0.2		1835	77364.1	4752	151.4	937	16.3
1836	3421.1	15189	4.8	532	0.2		1836	77399.7	3969	12.4	76	19.5
1837	3421.6	13096	6.3	698	0.3		1837	77432.4	5497	68.2	422	14.1
1838	3422.1	13707	4.6	515	0.2		1838	77441.3	5957	64.7	400	13
1839	3422.6	14780	4.8	529	0.2		1839	77460.8	3177	126.7	784	24.4
1840	3423.1	16410	4.8	538	0.2		1840	77481.3	5610	63.2	391	13.8
1841	3423.6	15452	4.7	522	0.2		1841	77491.1	4797	65.1	403	16.2
1842	3424.1	12607	4.7	528	0.3		1842	77554.1	5024	13.8	85	15.4
1843	3424.6	15572	7.4	827	0.2		1843	77607.6	4122	10.5	65	18.8
1844	3425.1	13328	10	1119	0.3		1844	77631.1	4049	17.7	110	19.2
1845	3425.6	15880	20.8	2318	0.2		1845	77668.2	4348	58.5	362	17.9
1846	3426.2	11427	7.7	856	0.3		1846	77706	5313	48.9	303	14.6
1847	3426.9	19436	22.2	2472	0.2		1847	77756.2	5317	203.9	1262	14.6
1848	3427.6	14465	5.5	607	0.2		1848	77785.5	4052	160.1	991	19.2
1849	3428.3	19472	15.8	1764	0.2		1849	77812.8	5041	29.7	184	15.4
1850	3428.7	17372	2.4	265	0.2		1850	77837.8	4790	23.2	144	16.3
1851	3429.1	14667	4.6	515	0.2		1851	77903.9	4167	5.1	32	18.7
1852	3429.6	17578	11.4	1266	0.2		1852	77931.2	4136	1.7	11	18.8
1853	3430.1	18496	4.9	545	0.2		1853	77959	6431	9.1	56	12.1
1854	3430.5	14276	5	554	0.2		1854	77983.3	3692	39	242	21.1
1855	3431	13426	6	670	0.3		1855	78032.5	2547	164.1	1015	30.6
1856	3431.6	12731	4.3	475	0.3		1856	78079.8	3844	280.5	1736	20.3
1857	3432.2	8180	4.8	530	0.4		1857	78093.5	4806	307.6	1904	16.3
1858	3432.6	12163	4.1	454	0.3		1858	78103.4	4369	309.8	1917	17.9
1859	3433.1	15887	4	446	0.2		1859	78140.4	3197	418.9	2592	24.4
1860	3433.6	17507	5.3	591	0.2		1860	78173.3	8747	304.7	1886	8.9
1861	3434.1	18581	2.3	261	0.2		1861	78182.1	4374	334	2067	17.9
1862	3434.6	16764	3.7	408	0.2		1862	78285.4	5981	1.8	11	13.1
1863	3435.1	13467	3.6	396	0.3		1863	78374.2	4334	5.2	32	18.1
1864	3435.6	12326	4.9	542	0.3		1864	78436	5679	17	105	13.8
1865	3436.2	16628	5.9	654	0.2		1865	78465.6	4017	58.4	362	19.5
1866	3436.6	12419	4.5	498	0.3		1866	78500.4	5085	234.1	1449	15.4
1867	3437.1	11687	4.2	465	0.3		1867	78567	3580	676	4183	21.9
1868	3437.5	13768	6.3	704	0.2		1868	78601	5374	234.6	1452	14.6
1869	3438.1	14658	3	335	0.2		1869	78608.1	4031	236.9	1466	19.5
1870	3438.5	12657	4.1	461	0.3		1870	78642.1	5094	206.7	1279	15.4
1871	3439.3	12158	4.8	533	0.3		1871	78715	5208	4.5	28	15.1
1872	3439.6	12509	4.5	502	0.3		1872	78838.1	3578	18.9	117	22
1873	3440.2	16303	8.5	945	0.2		1873	78930.5	4235	333.8	2065	18.6
1874	3440.6	11022	2.8	316	0.3		1874	78940.9	5821	322.2	1994	13.6
1875	3441	13212	6.7	749	0.3		1875	78970.2	4913	701.4	4341	16.1
1876	3441.6	12134	4.5	499	0.3		1876	78985.3	3093	528.1	3268	25.5
1877	3442.2	11724	2.4	266	0.3		1877	79016.7	4052	260.2	1610	19.5
1878	3442.5	13541	4.2	463	0.3		1878	79042.5	3579	418.6	2590	22.1
1879	3443.1	13617	3.5	385	0.3		1879	79161.6	5755	29.5	182	13.8
1880	3443.6	11425	3.2	355	0.3		1880	79202.6	5935	7.7	47	13.3
1881	3444	7974	2.5	274	0.4		1881	79290	4812	177.1	1096	16.5
1882	3444.5	7353	2.5	276	0.5		1882	79315.8	5599	313.5	1940	14.2
1883	3445	14275	2.8	310	0.2		1883	79349.6	5745	14.8	91	13.8
1884	3445.6	15550	4.7	529	0.2		1884	79359.1	5745	14.7	91	13.8
1885	3446.2	8676	2.7	305	0.4		1885	79404.6	2644	809.6	5010	30
1886	3446.6	6927	3.6	403	0.5		1886	79527.1	5004	149.4	925	15.9
1887	3447.2	10454	4.6	516	0.3		1887	79552.7	3766	28.7	178	21.1
1888	3447.6	12572	5.4	601	0.3		1888	79581.2	5155	11.1	68	15.4
1889	3448.2	8613	3.7	414	0.4		1889	79610.7	3123	19.6	121	25.5
1890	3448.6	13380	4.4	488	0.3		1890	79650.1	4141	128.1	793	19.2
1891	3449.1	11424	2.8	313	0.3		1891	79770.3	3316	134.6	833	24.1
1892	3449.6	14887	4.3	481	0.2		1892	79807.6	4635	137	848	17.2
1893	3450.2	11853	2.7	300	0.3		1893	79858.2	5782	26.1	161	13.8
1894	3450.5	11612	1.6	182	0.3		1894	79900.9	4055	84.9	525	19.7
1895	3451.1	9010	2.1	238	0.4		1895	79929.4	6728	48.2	298	11.9
1896	3451.6	13897	3.4	374	0.2		1896	79957.4	7114	51.7	320	11.2
1897	3452.1	12607	3.1	345	0.3		1897	79982.4	4665	19.5	121	17.1
1898	3452.5	11434	2.8	315	0.3		1898	80020.8	4190	15.2	94	19.1
1899	3453	10413	2.3	251	0.3		1899	80067.9	4479	14	86	17.9
1900	3453.6	12772	4.2	463	0.3		1900	80096.6	6196	62.4	386	12.9
1901	3454.1	11788	2.6	287	0.3		1901	80108.2	4930	62.4	386	16.3
1902	3454.6	14303	4.8	540	0.2		1902	80121.1	5237	67.5	418	15.3
1903	3455.4	13322	6.1	683	0.3		1903	80167.6	4128	17	105	19.4
1904	3456.1	16910	8.8	975	0.2		1904	80256.3	3782	1639.8	10148	21.2
1905	3456.8	14858	5.9	655	0.2		1905	80309.5	8986	127.3	788	8.9
1906	3457.6	16380	8.6	957	0.2		1906	80314.5	4883	128.5	795	16.4
1907	3458.2	7349	3.4	381	0.5		1907	80359.5	2542	22.8	141	31.6
1908	3459.1	14289	3	332	0.2		1908	80375.6	4362	18.6	115	18.4
1909	3459.6	13771	3.3	364	0.3		1909	80416.2	2389	15.6	96	33.7
1910	3460.2	6430	1.7	187	0.5		1910	80465.9	5261	29.8	185	15.3
1911	3460.6	12883	2.6	292	0.3		1911	80515.3	3121	29.2	181	25.8
1912	3461.1	17861	3.1	343	0.2		1912	80530.7	7092	20.2	125	11.4
1913	3461.6	15647	2.7	298	0.2		1913	80545.5	3292	29.6	183	24.5
1914	3462.1	17245	1.9	211	0.2		1914	80595.6	4133	37	229	19.5
1915	3462.6	18349	1.6	173	0.2		1915	80609.3	3816	43.5	269	21.1
1916	3463.1	13062	1.2	130	0.3		1916	80670.9	3211	27.2	168	25.1
1917	3463.6	19935	0.3	34	0.2		1917	80737.1	4800	178.6	1105	16.8
1918	3465.5	21593	12.9	1433	0.2		1918	80789.3	4520	36.7	227	17.9
1919	3466	10389	0.2	20	0.3		1919	80844.7	5127	53.7	332	15.8
1920	3466.5	12757	1	114	0.3		1920	80864	5238	73	452	15.4
1921	3467	16189	3	329	0.2		1921	80889.9	5531	38	235	14.6
1922	3467.5	19302	23.3	2599	0.2		1922	80915.5	6295	32	198	12.9
1923	3468.3	13341	3.6	402	0.3		1923	80943.6	6759	33.8	209	12
1924	3469	16900	2	224	0.2		1924	80987.5	4153	48.5	300	19.5
1925	3469.5	19048	15	1668	0.2		1925	81016	4986	21.1	130	16.3
1926	3470.1	14949	0.7	75	0.2		1926	81027.7	4155	20.2	125	19.5
1927	3470.5	10636	1	114	0.3		1927	81048.8	3196	24.5	152	25.4
1928	3471	16435	2.6	286	0.2		1928	81062.9	5543	14.3	88	14.6
1929	3471.5	17350	4.9	545	0.2		1929	81110.8	4539	46.3	286	17.9
1930	3472.3	12879	1.6	182	0.3		1930	81138.1	4192	95.2	589	19.4
1931	3473	14496	0.9	95	0.2		1931	81182.5	4435	18.3	113	18.3
1932	3473.6	11978	1.7	190	0.3		1932	81225.7	3046	52.6	325	26.7
1933	3474.5	12713	1.8	206	0.3		1933	81266.4	4168	16.7	103	19.5
1934	3475.1	13360	1.2	139	0.3		1934	81291.8	6253	22.2	137	13
1935	3475.6	18429	2.7	296	0.2		1935	81320.5	3146	11.2	70	25.8
1936	3476.2	11444	0.7	79	0.3		1936	81386.1	3710	238.2	1474	21.9
1937	3476.6	15168	0.8	89	0.2		1937	81435.5	4009	31.5	195	20.3
1938	3477	14201	0.6	71	0.2		1938	81454.3	4177	30.9	191	19.5
1939	3477.9	5684	1.4	152	0.6		1939	81488.6	5572	85.4	528	14.6
1940	3478.7	9192	1.8	198	0.4		1940	81568.5	2852	32.2	199	28.6
1941	3479.6	6628	4.4	488	0.5		1941	81588.8	6694	21.4	133	12.2
1942	3480.1	7722	4.7	526	0.5		1942	81596.1	3720	21.5	133	21.9
1943	3480.6	15145	5	552	0.2		1943	81644.9	3925	24.7	153	20.8
1944	3481.1	11559	2.8	312	0.3		1944	81660.1	3881	15.3	95	21
1945	3481.6	13509	3.7	416	0.3		1945	81684.9	5027	19.7	122	16.3
1946	3482.1	11071	1.9	208	0.3		1946	81722.8	5029	23	142	16.3
1947	3482.5	10546	3.4	382	0.3		1947	81738	5589	21.6	133	14.6
1948	3483.1	12124	3.3	364	0.3		1948	81759.5	100627	35.3	219	0.8
1949	3483.5	9289	1.7	185	0.4		1949	81769.8	4792	37.3	231	17.1
1950	3484.2	5465	2.1	233	0.6		1950	81796.5	5096	67.5	418	16.1
1951	3484.6	9819	2.1	234	0.4		1951	81845.2	4909	99.5	616	16.7
1952	3485.1	13115	4.2	465	0.3		1952	81882.2	3240	60	371	25.3
1953	3485.6	8361	3	330	0.4		1953	81902.5	3612	80	495	22.7
1954	3486.1	12885	6.1	681	0.3		1954	81930.7	5628	105.5	653	14.6
1955	3486.6	9015	3.3	364	0.4		1955	81941.9	6364	88.9	550	12.9
1956	3487	9093	2.2	245	0.4		1956	81959.4	5004	80.4	497	16.4
1957	3487.6	6082	3.3	369	0.6		1957	81968.8	4204	81.7	505	19.5
1958	3488.2	9733	4.2	473	0.4		1958	81985.4	5196	75.4	467	15.8
1959	3488.6	9474	3.5	394	0.4		1959	82009.7	3738	41.6	258	21.9
1960	3489.1	10061	3.3	364	0.3		1960	82052.5	3884	20.4	126	21.1
1961	3489.6	9442	2.4	272	0.4		1961	82090.7	3319	131.9	816	24.7
1962	3490.1	8461	2.3	256	0.4		1962	82121.5	7219	29.6	183	11.4
1963	3490.6	11537	5.3	585	0.3		1963	82133.9	4212	34.9	216	19.5
1964	3491.5	9311	4	447	0.4		1964	82188.7	5620	40	247	14.6
1965	3492.1	9707	4.6	508	0.4		1965	82206	3121	54.9	340	26.3
1966	3492.6	7754	3.1	346	0.5		1966	82262.2	6328	17.7	110	13
1967	3493.1	7364	2.3	252	0.5		1967	82307	4148	81.6	505	19.8
1968	3493.6	10388	4.2	471	0.3		1968	82347.4	6757	18	111	12.2
1969	3494.2	10763	3.3	372	0.3		1969	82370	3787	38.4	238	21.8
1970	3495.1	15433	11.7	1298	0.2		1970	82391.1	3657	37.2	230	22.5
1971	3495.6	9231	4	445	0.4		1971	82430.2	4227	42.3	262	19.5
1972	3496	6621	4.9	551	0.5		1972	82461	5015	170.6	1056	16.4
1973	3496.6	10878	19.8	2211	0.3		1973	82470.2	5784	151.6	938	14.3
1974	3497.2	5091	7.7	861	0.7		1974	82513.1	5078	46.3	287	16.3
1975	3497.6	7773	6.4	712	0.4		1975	82587	4213	236.9	1466	19.6
1976	3498	9371	11.2	1246	0.4		1976	82620.2	4097	19.2	119	20.2
1977	3498.5	7627	5	554	0.5		1977	82684.1	4253	56.2	348	19.4
1978	3499	6497	4.1	460	0.5		1978	82709.3	4429	110.9	686	18.7
1979	3499.6	12355	7	775	0.3		1979	82765.2	5361	3.5	22	15.4
1980	3500.2	8454	3.7	416	0.4		1980	82838.9	2949	146.4	906	28.1
1981	3500.6	8712	2.5	274	0.4		1981	82859.9	6719	61.5	381	12.3
1982	3501.1	9490	5.1	573	0.4		1982	82890.2	9645	49.6	307	8.6
1983	3501.6	9104	4.2	473	0.4		1983	82933.4	4087	280.8	1738	20.3
1984	3502.1	7658	4.4	491	0.5		1984	82970.7	4254	65.7	407	19.5
1985	3502.6	10571	5.7	639	0.3		1985	83022.8	5677	4.3	27	14.6
1986	3503.1	7528	6.8	759	0.5		1986	83063.3	3623	41.8	259	22.9
1987	3503.6	5784	4.4	494	0.6		1987	83086.3	5512	25	155	15.1
1988	3504.1	8649	5.5	618	0.4		1988	83134.3	2503	2.5	15	33.2
1989	3504.6	8038	4.4	489	0.4		1989	83190.1	5688	163.1	1010	14.6
1990	3505	10302	6.9	772	0.3		1990	83214.8	5390	65.8	407	15.4
1991	3505.6	12298	7.3	819	0.3		1991	83305.5	3491	305.7	1892	23.9
1992	3506	6740	6.7	748	0.5		1992	83367.4	4886	75.5	467	17.1
1993	3507	9531	5.7	631	0.4		1993	83398.5	3610	355.4	2199	23.1
1994	3507.7	7272	4.9	541	0.5		1994	83477.3	2953	17.8	110	28.3
1995	3508.1	7906	4.5	506	0.4		1995	83511.7	2967	17	105	28.1
1996	3508.7	7394	4.5	497	0.5		1996	83530.5	3391	19	117	24.6
1997	3509.8	7457	6	672	0.5		1997	83572.5	3331	20.2	125	25.1
1998	3510.6	9760	3.5	387	0.4		1998	83602.5	6053	12.1	75	13.8
[truncated: 943 more rows]

## Sheet: Interpretation
Protein conjugation (3B vs 3A)
Protein	Mass	% Intensity without Cnt/BcPAP [+/-3 Da]	% Intensity with Cnt/BcPAP [+/-3 Da]
Ub	13091	100	0.25
MBP	42347	51	0.125
Ub-MBP	52380	0	100
Peptides (3C)
Sequence	Mass	Intensity [+/-3 Da]	% Intensity
PGAFDADPLVVEISEEGEGSWSHPQFEK	3058	30231	0.1
GAFDADPLVVEISEEGEGSWSHPQFEK	2961	26264423	99.8
AFDADPLVVEISEEGEGSWSHPQFEK	2904	9929	0
