# Supplementary material for: Enzymatic protein fusions with 100% product yield
Source: eLife. 2025 Apr 1;13:RP102765. doi: 10.7554/eLife.102765 (PMC11961121; doi:10.7554/eLife.102765)
Supplement: Appendix 1—figure 5—source data 3. [file elife-102765-app1-fig5-data3.xlsx]

## Sheet: Densitometric data
Day	LC-Strep	HC-Strep	Ref (300 fmol)	signal ratio [aHER2/Ref]	fmol aHER2 subunits on gel	fmol aHER2 subunits per µl medium	fmol assembled AB per µl	mg Antibody per liter medium
0	4.25	7.15	n.d.
1	27.5	44.7	1140	0.0633333	19	7.6	1.9	0.304
2	29.9	59.6	403	0.222084	66.6253	26.6501	6.66253	1.066
3	23.6	54.7	384	0.203906	61.1719	24.4688	6.11719	0.97875
4	29.6	70.6	342	0.292982	87.8947	35.1579	8.78947	1.40632
5	29	75.8	249	0.420884	126.265	50.506	12.6265	2.02024
6	30.6	81.2	198	0.564646	169.394	67.7576	16.9394	2.7103
7	40.4	79.2	259	0.461776	138.533	55.4131	13.8533	2.21653
8	45.8	84.7	284	0.459507	137.852	55.1408	13.7852	2.20563
9	52.9	92	305	0.475082	142.525	57.0098	14.2525	2.28039
10	50.6	78.1	343	0.375219	112.566	45.0262	11.2566	1.80105
					adjusted for reference quantities (300 fmol)	adjusted for loading volume (2.5 µl)	adjusted for number of AB chains (4)	adjusted for molecular weight (160000 g/mol)
