# Supplementary material for: Enzymatic protein fusions with 100% product yield
Source: eLife. 2025 Apr 1;13:RP102765. doi: 10.7554/eLife.102765 (PMC11961121; doi:10.7554/eLife.102765)
Supplement: Appendix 1—figure 8—source data 3. [file elife-102765-app1-fig8-data3.xlsx]

## Sheet: Sheet1
RELASKDPGAFDADPLVVEI					ELASKDPGAFDADPLVVEI					LASKDPGAFDADPLVVEI						relative rate
Time [min]	Ub-Strep	RELAS	Ratio		Time [min]	Ub	ELAS	Ratio		Time [min]	Ub	LAS	Ratio		RELAS	94.064
2	6084.23	176.556	2.82003		2	6121.13	199.971	3.16354		2	6142.89	73.778	1.18678		ELAS	100
8	5760.94	823.042	12.5007		8	5516.89	763.042	12.1505		8	5819.94	323.799	5.27039		LAS	46.7493
24	5314.6	1922.28	26.5623		24	4924.31	1980.65	28.6845		24	5484.89	842.456	13.3145
60	4553.18	2734.06	37.5185		60	4141.48	2871.48	40.9453		60	5044.43	1631.65	24.4402
