# Supplementary material for: Enzymatic protein fusions with 100% product yield
Source: eLife journal article supplement (doi:10.7554/elife.102765), 2024-12-19
Supplement: fig4-data3 [file elife-102765-fig4-data3-v1.zip]

## Sheet: Unconjugated antibody
#	m/z	Res.	S/N	I	FWHM		Assigned antibody assemblies
1	100033	4230	24.1	384	24		Assembly	Mass	Intensity	% Intensity
2	100078	2736	7.1	113	37		HC2LC2-Strep4	161012	64931	69.1344
3	100123	3718	3.8	61	27		HC2LC1-Strep3	133678	383	0.407794
4	100202	2459	6.3	101	41		HC2-Strep2	106344	28606	30.4578
5	100269	3121	3.3	53	32
6	100319	2924	15.4	245	34
7	100401	5408	9.6	154	19		Note: Shown is a list of detected masses, after charge deconvolution.
8	100467	5522	6.2	98	18		Note 2: Many detected masses constitue background noise or deconvolution artifacts.
9	100529	3806	1.5	24	26		Note 3: The C-terminal Strep-tag lysine (WSHPQFE|K) is missing in 70% of all antibody subunits. Therefore, each assembly is found in several peaks, shifted by the molecular weight of lysine (128 Da). The intensities of these peaks have been integrated.
10	100646	4726	17.2	274	21
11	100714	3780	2.9	46	27
12	100785	4489	1.1	17	22
13	100870	4610	0.7	10	22
14	100948	3809	0.7	11	27
15	100984	3761	1.6	26	27
16	101052	3507	2.6	41	29
17	101083	4575	1.8	29	22
18	101139	5960	3.8	61	17
19	101239	5211	3.4	55	19
20	101295	3712	0.7	11	27
21	101383	4506	9.6	154	22
22	101469	6408	5.8	92	16
23	101592	3469	12	192	29
24	101629	4862	42	670	21
25	101646	3820	40.8	650	27
26	101699	2127	14.1	226	48
27	101733	2614	18.9	301	39
28	101804	4344	5.2	83	23
29	101851	3819	12.7	203	27
30	101909	4907	18.3	292	21
31	101987	2928	12.2	194	35
32	102037	2309	10	159	44
33	102075	3864	13.8	220	26
34	102142	3209	66.4	1058	32
35	102199	4006	27.9	445	26
36	102246	4642	9.7	154	22
37	102295	3942	11.3	180	26
38	102389	6544	73.2	1167	16
39	102431	5241	6.6	105	20
40	102486	4944	13.7	218	21
41	102541	3343	4.6	73	31
42	102637	2708	0.8	13	38
43	102689	4106	2.6	41	25
44	102734	4501	3.6	57	23
45	102818	4829	2.7	42	21
46	102839	5235	2.1	34	20
47	102892	4453	0.9	14	23
48	102982	5796	11	175	18
49	103030	5122	2	33	20
50	103063	5059	3.7	59	20
51	103140	2723	0.7	11	38
52	103178	5134	4.4	70	20
53	103369	5481	3.6	57	19
54	103443	4504	0.8	13	23
55	103529	5501	1.9	31	19
56	103637	3518	3.2	50	29
57	103712	3324	9.1	145	31
58	103797	3475	3.6	58	30
59	103876	5375	28.4	453	19
60	103972	2906	8.9	143	36
61	104011	3552	12.7	202	29
62	104056	6223	67.1	1070	17
63	104094	3264	30.8	491	32
64	104131	3014	28.8	460	35
65	104187	3855	88.3	1407	27
66	104271	2949	69.2	1104	35
67	104321	3444	24.1	385	30
68	104443	3908	1.9	30	27
69	104490	2951	2.3	36	35
70	104540	5394	1.6	26	19
71	104587	3588	7.6	121	29
72	104633	2839	22.4	357	37
73	104691	4213	6.2	99	25
74	104725	3724	2.5	40	28
75	104800	5483	3.3	53	19
76	104881	5567	3.4	55	19
77	104953	3841	2.4	39	27
78	105055	4272	10.9	174	25
79	105077	5371	11.2	179	20
80	105159	4595	11.2	178	23
81	105244	3284	7	112	32
82	105314	4183	5.9	95	25
83	105408	4657	4.4	70	23
84	105464	2862	1.6	25	37
85	105496	2484	2	31	42
86	105590	2706	2.1	33	39
87	105657	5163	2.2	36	20
88	105780	3761	1.5	23	28
89	105866	4483	1.2	19	24
90	105927	4979	0.8	13	21
91	106018	4921	1.7	27	22
92	106087	4362	1204.7	19204	24
93	106219	4851	354	5644	22
94	106353	3972	593.4	9459	27
95	106457	4213	29.5	470	25
96	106527	3577	1.7	26	30
97	106562	3874	7.4	118	28
98	106648	3903	0.7	12	27
99	106719	3034	0.8	13	35
100	106754	6217	15.4	245	17
101	106809	3877	3.4	54	28
102	106881	3816	19.3	308	28
103	107003	4796	24.1	384	22
104	107085	5286	32.6	519	20
105	107177	5632	68.4	1090	19
106	107268	6524	3.2	52	16
107	107362	4012	16.7	267	27
108	107421	4841	1.5	25	22
109	107476	5968	2.2	35	18
110	107525	4977	5.6	88	22
111	107563	3323	1.2	19	32
112	107678	3703	1	16	29
113	107710	5467	6.7	107	20
114	107786	4470	4.5	71	24
115	107801	3151	5.3	84	34
116	107831	4836	2.6	41	22
117	107876	4941	6	96	22
118	107926	5140	2.9	46	21
119	107977	3874	21.9	349	28
120	108020	2748	9.7	155	39
121	108061	3290	9.4	150	33
122	108083	3302	10.3	164	33
123	108121	2926	9.3	148	37
124	108138	3962	7.8	125	27
125	108187	6135	10.4	165	18
126	108240	3952	11	175	27
127	108262	4524	14	223	24
128	108297	4193	37.1	592	26
129	108328	5693	20.6	328	19
130	108397	4293	15.6	249	25
131	108410	4160	15	239	26
132	108447	5933	26	415	18
133	108496	4328	13.2	211	25
134	108546	3141	10.1	161	35
135	108591	3548	15	240	31
136	108656	3733	7.7	122	29
137	108723	6061	8.1	129	18
138	108827	3041	21.6	344	36
139	108911	4751	5.5	87	23
140	108991	3266	2.8	45	33
141	109016	4229	2.8	45	26
142	109086	2963	10.8	172	37
143	109128	5137	2.3	37	21
144	109171	5074	5.9	94	22
145	109247	4309	0.7	12	25
146	109276	4024	2	32	27
147	109356	3486	6.8	108	31
148	109377	4496	6.3	100	24
149	109447	6167	1	16	18
150	109547	4549	1.3	20	24
151	109662	4829	5.7	91	23
152	109748	4276	4.5	72	26
153	109820	3771	14	224	29
154	109871	3845	5.1	81	29
155	109923	3756	12.8	204	29
156	109988	2567	22.4	357	43
157	110088	4702	8.4	133	23
158	110170	4275	27.7	441	26
159	110253	4448	23.4	373	25
160	110355	3507	11.2	178	31
161	110395	3706	9.8	157	30
162	110446	4141	6.8	108	27
163	110518	3685	32.7	522	30
164	110604	5835	12.4	198	19
165	110697	5642	47.1	751	20
166	110782	4216	21.8	347	26
167	110833	3992	2.9	46	28
168	110884	4203	24.8	395	26
169	110913	4649	17.9	285	24
170	110955	4734	5.1	81	23
171	110986	3246	7.9	126	34
172	111007	3146	5.3	85	35
173	111081	2971	9	143	37
174	111183	4842	3.8	60	23
175	111253	3922	4.8	77	28
176	111290	3116	8.1	129	36
177	111388	5121	1.9	30	22
178	111426	4087	9.9	157	27
179	111484	4129	4.9	79	27
180	111507	5262	3.3	52	21
181	111537	6112	9	144	18
182	111623	2058	2.6	41	54
183	111694	5874	2.3	37	19
184	111776	2827	10.1	161	40
185	111804	5858	9.4	150	19
186	111861	4424	2.7	43	25
187	111922	3780	2.2	35	30
188	111954	3924	7.4	119	29
189	111990	3629	5.4	87	31
190	112030	3535	4.8	76	32
191	112071	2529	5.5	87	44
192	112138	4055	2.6	42	28
193	112198	4969	2.7	43	23
194	112218	4398	3.5	56	26
195	112235	5479	3.5	56	20
196	112281	4822	6	95	23
197	112318	3016	6.2	99	37
198	112359	4267	8.5	135	26
199	112415	4667	4.3	69	24
200	112447	3266	7.1	114	34
201	112514	3853	1.9	30	29
202	112544	3130	1.9	30	36
203	112599	5516	15.5	247	20
204	112626	4805	5.3	85	23
205	112719	3682	40.3	642	31
206	112815	3802	3	47	30
207	112855	4230	28.6	456	27
208	112950	5488	8	127	21
209	112967	4131	8.5	135	27
210	113023	4026	35.9	572	28
211	113147	3772	53.4	851	30
212	113227	2412	2.8	45	47
213	113318	5041	30.6	487	22
214	113374	4150	4.6	74	27
215	113410	5008	3.1	49	23
216	113459	4556	8.8	140	25
217	113516	3875	2.2	34	29
218	113569	3967	7.1	113	29
219	113624	2524	3.2	51	45
220	113698	5939	2.3	36	19
221	113816	5222	32.6	520	22
222	113910	6300	35.3	563	18
223	114000	4542	8.8	141	25
224	114087	4979	28.8	459	23
225	114202	4209	39.2	625	27
226	114250	3663	6.2	99	31
227	114345	2751	6	95	42
228	114397	4182	6.3	100	27
229	114450	3523	1.3	20	32
230	114494	3665	2.2	35	31
231	114568	4384	31.3	500	26
232	114634	5564	10.1	160	21
233	114652	4851	6.5	104	24
234	114743	3449	24.1	384	33
235	114796	3425	2.4	38	34
236	114826	3874	3.3	53	30
237	114857	5669	9	143	20
238	114932	2745	2.7	43	42
239	115022	4617	27.3	436	25
240	115113	5086	9.7	155	23
241	115148	5033	2	32	23
242	115213	2905	3.5	56	40
243	115250	6969	2	32	17
244	115356	5121	2.5	40	23
245	115432	4053	19	303	28
246	115531	4795	19.9	318	24
247	115593	5436	7.2	115	21
248	115633	5229	22.7	361	22
249	115716	3527	1.4	23	33
250	115778	2206	1.9	30	52
251	115836	5240	5.8	93	22
252	115918	3539	13.3	211	33
253	115961	2936	17.5	279	39
254	116010	3934	9.7	155	29
255	116054	4812	11.2	178	24
256	116094	3711	7	112	31
257	116128	3843	4	64	30
258	116158	4659	6.3	101	25
259	116225	3599	28.9	461	32
260	116288	3464	11.1	177	34
261	116400	3813	4.3	69	31
262	116431	2767	3.4	55	42
263	116502	4992	7.2	114	23
264	116544	3770	3.5	56	31
265	116597	2497	7.7	123	47
266	116626	4681	6	96	25
267	116697	4064	13	207	29
268	116731	3952	11.1	178	30
269	116802	4616	5.7	91	25
270	116821	4158	5.7	90	28
271	116843	5445	4.7	75	21
272	116900	5814	5.2	84	20
273	116982	5380	15.3	243	22
274	117076	4226	8.1	129	28
275	117140	3964	2.8	44	30
276	117192	4143	12.6	201	28
277	117292	5602	18.6	296	21
278	117386	4314	15.5	247	27
279	117434	4845	4.9	78	24
280	117514	3600	5.2	83	33
281	117591	3441	6.1	97	34
282	117674	4067	19.6	312	29
283	117796	3282	32.1	511	36
284	117891	4569	57.6	918	26
285	117986	4669	1.2	19	25
286	118039	6838	2	32	17
287	118103	3638	26.3	419	32
288	118134	3174	28.3	452	37
289	118251	4378	38.3	610	27
290	118323	5997	6	95	20
291	118395	6205	22.6	361	19
292	118449	4878	10	159	24
293	118483	4114	6	96	29
294	118552	4587	3	47	26
295	118578	4599	1.7	26	26
296	118605	3158	2.2	36	38
297	118675	4361	6	95	27
298	118731	6215	4.1	66	19
299	118794	5614	7.6	122	21
300	118831	3150	1.7	27	38
301	118865	4968	2.1	33	24
302	118895	2993	3.2	51	40
303	118988	5449	23	367	22
304	119078	3954	47.5	757	30
305	119146	3244	3.9	62	37
306	119183	7299	44.5	710	16
307	119223	4394	3.9	63	27
308	119288	3609	9.8	156	33
309	119384	5471	5.1	81	22
310	119469	4100	3.4	55	29
311	119497	5113	5.9	93	23
312	119576	5156	10.9	173	23
313	119645	3017	13.6	216	40
314	119677	5084	7.8	125	24
315	119714	5113	11.1	177	23
316	119735	4429	16.4	262	27
317	119772	4789	8.4	134	25
318	119795	2713	6.3	100	44
319	119836	3652	3.5	55	33
320	119891	4464	9	143	27
321	119938	5031	14.5	231	24
322	119983	2705	4.8	77	44
323	120021	3012	3.4	54	40
324	120087	3809	17	271	32
325	120172	5533	15.1	241	22
326	120232	4887	25.1	400	25
327	120285	5066	4.8	77	24
328	120377	4208	31.9	509	29
329	120479	3351	19.3	308	36
330	120501	4284	18.4	293	28
331	120561	5311	16.9	269	23
332	120635	4289	2.6	41	28
333	120673	5183	9	144	23
334	120720	3838	0.8	13	31
335	120775	3333	7.6	121	36
336	120852	4128	1.3	21	29
337	120923	3752	5	80	32
338	120956	4812	12.5	199	25
339	121091	4134	21.9	348	29
340	121134	5734	5.5	87	21
341	121180	3879	10.2	162	31
342	121238	2899	7.2	115	42
343	121321	3660	6.4	102	33
344	121376	4624	4	64	26
345	121400	51797	4.1	66	2
346	121481	3994	11	175	30
347	121558	4479	31.5	502	27
348	121668	3729	9.7	155	33
349	121716	3541	5.3	84	34
350	121770	5503	6.6	105	22
351	121862	4731	18.2	290	26
352	121887	5004	28.2	449	24
353	121965	4051	9.3	149	30
354	122065	3918	9.1	145	31
355	122088	3956	5.6	89	31
356	122175	4517	9.4	150	27
357	122258	5589	10.8	172	22
358	122280	3436	10.4	166	36
359	122371	4973	28.7	458	25
360	122408	5064	32	510	24
361	122438	5338	10.3	165	23
362	122486	4015	3.7	59	31
363	122523	5285	11	175	23
364	122551	4869	11.9	189	25
365	122567	3090	11.9	189	40
366	122631	4360	0.9	15	28
367	122723	4821	15.9	253	25
368	122745	3475	17.6	281	35
369	122871	6059	10.8	173	20
370	122896	5178	4.9	78	24
371	122951	2994	1.3	21	41
372	123036	3249	26.2	418	38
373	123140	3869	8.1	129	32
374	123195	3755	2.5	40	33
375	123233	4562	13	207	27
376	123275	3344	3.8	60	37
377	123307	3958	4	63	31
378	123367	4046	5.7	91	30
379	123428	4248	6	96	29
380	123473	5503	20.7	331	22
381	123527	4101	2.6	42	30
382	123563	3766	4.3	68	33
383	123613	5860	2.3	37	21
384	123659	3547	38.6	615	35
385	123719	3320	1.8	28	37
386	123772	5525	10.3	164	22
387	123856	4298	13.5	215	29
388	123881	3424	13.6	216	36
389	123955	4462	1.3	20	28
390	123983	5039	4.2	66	25
391	124005	6043	2.5	40	21
392	124085	4539	28.2	450	27
393	124150	3848	9.5	151	32
394	124184	5464	17.6	281	23
395	124266	5170	18.2	290	24
396	124298	4797	10.4	166	26
397	124358	3389	12.5	200	37
398	124405	4825	4.1	66	26
399	124456	5141	17	271	24
400	124503	4829	4.2	67	26
401	124557	5471	20.3	324	23
402	124622	4735	6	96	26
403	124694	4337	31.8	507	29
404	124713	4459	36.7	585	28
405	124788	4154	5	79	30
406	124844	3712	9.5	151	34
407	124935	5325	19.8	315	23
408	124962	4752	7.7	123	26
409	125046	4244	12.9	205	29
410	125133	3274	10.2	163	38
411	125184	5228	5.5	87	24
412	125245	4134	6.6	105	30
413	125318	2456	3.3	53	51
414	125359	4906	5.5	87	26
415	125385	5422	10.9	173	23
416	125503	4678	30.3	484	27
417	125562	3663	24.4	389	34
418	125623	3417	5.7	91	37
419	125663	4994	3.5	55	25
420	125731	3994	7.5	119	31
421	125791	3156	2.4	38	40
422	125842	3835	0.8	12	33
423	125895	4392	10.6	169	29
424	125975	2822	2.2	36	45
425	126024	3794	2.2	35	33
426	126102	5037	37.3	595	25
427	126225	5259	12.2	195	24
428	126294	5590	12.2	194	23
429	126319	3685	18.9	301	34
430	126424	6284	36.6	583	20
431	126523	4761	49.3	786	27
432	126553	4859	22.8	364	26
433	126640	4740	4.7	75	27
434	126666	4233	3.7	59	30
435	126726	3179	13.4	214	40
436	126776	3682	3.7	59	34
437	126810	4023	6	96	32
438	126846	3750	19.7	313	34
439	126899	2577	5.4	86	49
440	126963	6679	11.6	185	19
441	126998	4942	3.8	60	26
442	127089	3712	5.1	81	34
443	127154	4704	9.4	149	27
444	127224	4044	6.4	102	31
445	127288	3925	61.7	984	32
446	127400	3638	10.1	161	35
447	127470	2531	1.2	19	50
448	127510	3843	1.1	17	33
449	127545	4897	0.9	14	26
450	127616	3971	18.8	300	32
451	127654	3837	11.7	186	33
452	127693	5654	22	351	23
453	127746	5898	12.2	195	22
454	127808	4706	19	303	27
455	127839	3701	17.4	278	35
456	127866	3224	14.4	230	40
457	127913	3360	9.5	151	38
458	127968	4261	4.8	77	30
459	128036	4155	6.5	103	31
460	128103	4259	6	95	30
461	128228	3529	14.8	235	36
462	128276	3179	14.4	229	40
463	128297	4655	13.3	212	28
464	128341	3921	4.6	73	33
465	128421	5604	19	302	23
466	128505	4654	33.8	540	28
467	128611	3756	15.5	247	34
468	128651	3631	13.8	220	35
469	128702	5320	10.6	169	24
470	128781	3783	3.5	55	34
471	128820	5513	16.7	267	23
472	128894	3913	2.2	35	33
473	128975	4479	26.3	419	29
474	129027	4493	6	95	29
475	129089	5311	6.7	107	24
476	129148	5334	22.5	358	24
477	129235	3475	11.9	189	37
478	129305	2217	2.9	45	58
479	129334	4791	2.5	39	27
480	129366	4091	2.3	37	32
481	129404	3092	6.5	103	42
482	129438	4079	3.7	58	32
483	129505	7032	8.5	135	18
484	129539	2871	5.7	91	45
485	129596	5362	19.2	306	24
486	129664	4378	3.7	59	30
487	129704	3074	2	33	42
488	129746	6072	14.4	229	21
489	129774	4808	14.8	235	27
490	129836	4472	16	255	29
491	129917	2462	2.6	41	53
492	129979	3978	3.7	59	33
493	130018	5043	1.8	28	26
494	130069	3270	20.6	328	40
495	130111	5451	6.5	103	24
496	130170	5261	15.4	245	25
497	130191	3562	19.6	313	37
498	130227	5141	31.3	499	25
499	130242	4886	34.5	550	27
500	130340	2966	2.4	38	44
501	130388	2263	6.9	110	58
502	130462	3711	1.8	28	35
503	130541	3416	16.3	260	38
504	130580	4548	18.8	300	29
505	130650	4444	7.2	114	29
506	130699	3980	20.1	321	33
507	130747	4649	2.8	45	28
508	130782	4832	7	111	27
509	130811	4166	4.4	69	31
510	130883	4027	22.7	362	32
511	130913	4933	36.1	576	27
512	131010	4996	8.2	130	26
513	131025	5590	7.3	117	23
514	131084	3901	51.8	826	34
515	131159	5596	2.1	34	23
516	131213	3974	21.5	343	33
517	131232	4912	20.4	325	27
518	131340	3452	15.4	246	38
519	131367	4859	10.6	169	27
520	131400	6304	10.7	171	21
521	131470	3894	2.1	34	34
522	131521	5137	23.4	374	26
523	131604	4679	4.9	77	28
524	131640	6203	27.4	437	21
525	131751	3634	8.4	133	36
526	131847	5202	15.2	243	25
527	131901	7095	4.7	75	19
528	131949	5276	6.6	105	25
529	131999	3821	2.1	33	35
530	132033	5933	3.6	58	22
531	132074	3200	17.5	278	41
532	132104	4432	14.6	233	30
533	132151	3523	10.2	162	38
534	132220	5425	3.1	49	24
535	132270	4910	6.2	99	27
536	132342	4175	15.5	248	32
537	132400	4299	8	127	31
538	132453	3501	5.4	86	38
539	132503	5000	11.5	184	27
540	132617	4715	3.5	56	28
541	132644	2991	5.2	82	44
542	132678	3828	5.1	81	35
543	132765	4095	25.5	407	32
544	132822	5339	7	111	25
545	132860	5740	10.9	174	23
546	132924	4001	35.4	564	33
547	132994	3044	7.2	115	44
548	133051	4725	7	112	28
549	133085	3659	2.8	45	36
550	133151	6045	13.2	211	22
551	133187	4563	5.4	85	29
552	133248	5356	28.2	450	25
553	133297	6030	14.2	227	22
554	133372	4432	6.8	109	30
555	133411	4314	3.2	50	31
556	133502	5597	21.8	347	24
557	133587	3016	4.6	73	44
558	133680	5830	6.7	107	23
559	133758	4151	105.3	1678	32
560	133830	4903	6.6	105	27
561	133867	4334	6	95	31
562	133956	3131	10	159	43
563	134003	5960	7.7	122	22
564	134029	4067	5	80	33
565	134085	4602	14.3	228	29
566	134132	5393	11.7	186	25
567	134211	2658	39.3	627	51
568	134265	4401	10	160	31
569	134316	4916	3.7	59	27
570	134344	2576	5	80	52
571	134389	5778	21.7	346	23
572	134462	5577	4.6	74	24
573	134506	4415	2.8	45	30
574	134535	4388	2.8	45	31
575	134568	6860	6.7	107	20
576	134596	5467	3.6	57	25
577	134693	3995	48.4	771	34
578	134824	3990	30.1	480	34
579	134893	3980	4.1	66	34
580	134973	4430	6.8	108	30
581	135015	4133	13.4	214	33
582	135077	3487	2.2	35	39
583	135156	5462	19.3	307	25
584	135221	4399	3.8	61	31
585	135266	4085	9	143	33
586	135297	3950	10.1	161	34
587	135354	4342	12.6	200	31
588	135377	5370	10.9	174	25
589	135465	3587	4.5	71	38
590	135531	5783	3	48	23
591	135560	6144	4.6	73	22
592	135603	4397	16.1	257	31
593	135642	4751	3.8	61	29
594	135700	4449	19.1	304	31
595	135759	3807	15.8	253	36
596	135813	3153	29	463	43
597	135929	7446	5.1	81	18
598	135977	6855	2	33	20
599	136041	5277	99.6	1588	26
600	136138	4939	9.6	153	28
601	136202	3634	1.6	25	37
602	136268	4914	9.7	155	28
603	136322	4091	3.5	56	33
604	136414	4934	56.7	904	28
605	136478	3753	12.5	200	36
606	136514	4652	7.7	123	29
607	136563	5384	4.5	72	25
608	136621	3657	3	48	37
609	136718	4332	59.1	942	32
610	136842	3434	18.4	293	40
611	136879	4981	45.3	723	27
612	136941	5196	51.3	818	26
613	137026	3555	21.9	349	39
614	137081	6398	13.5	214	21
615	137157	5791	14.8	236	24
616	137274	4748	8.5	136	29
617	137334	7965	9.5	151	17
618	137444	5446	12.9	206	25
619	137481	4586	13.9	221	30
620	137512	4473	9.2	147	31
621	137578	4080	5.4	87	34
622	137607	3710	6.6	106	37
623	137688	5322	10.7	171	26
624	137718	5731	4.2	67	24
625	137825	3329	9	143	41
626	137892	4247	3.6	57	32
627	137923	6430	6.8	108	21
628	137955	4525	6.1	97	30
629	137991	3956	7.1	113	35
630	138063	5185	17	271	27
631	138101	3092	8.2	131	45
632	138146	3086	6.9	110	45
633	138185	6173	11.2	179	22
634	138289	5288	30.1	480	26
635	138331	3353	10	159	41
636	138373	3558	10.5	168	39
637	138423	3477	6.1	97	40
638	138489	4604	27.9	444	30
639	138548	2711	21.5	343	51
640	138669	4489	10.8	173	31
641	138715	6433	54.7	872	22
642	138817	4813	7.6	122	29
643	138863	3460	12.5	200	40
644	138904	3303	11.4	182	42
645	138966	5082	46.6	743	27
646	139095	5295	31.2	497	26
647	139223	5463	6.1	97	25
648	139267	6173	4.8	77	23
649	139304	6154	17.6	281	23
650	139350	5675	24.3	388	25
651	139380	5618	11.3	180	25
652	139434	3500	9.7	155	40
653	139538	4514	2.7	43	31
654	139566	5488	5.9	94	25
655	139623	4040	3.4	54	35
656	139647	4803	4	64	29
657	139688	4711	7.2	114	30
658	139728	4028	13	208	35
659	139786	4037	26.8	427	35
660	139878	4723	4.8	77	30
661	139927	3298	9.9	158	42
662	139984	3752	11.6	185	37
663	140012	3514	13.1	208	40
664	140038	2987	11.6	186	47
665	140079	4981	10.7	170	28
666	140104	5720	18.3	292	24
667	140188	4315	25.1	401	32
668	140284	4250	10.9	173	33
669	140372	6667	21.5	343	21
670	140442	4542	18.3	292	31
671	140559	4085	14.3	228	34
672	140617	5834	11.2	178	24
673	140718	3943	11.4	182	36
674	140786	4333	26.9	428	32
675	140906	3642	21.6	344	39
676	140993	5055	13.2	210	28
677	141027	4224	17.9	286	33
678	141068	4532	15.9	253	31
679	141129	4040	15.2	242	35
680	141245	5738	20.7	330	25
681	141374	3512	10.7	171	40
682	141466	4516	75.5	1203	31
683	141614	4204	35.8	570	34
684	141644	4400	19.3	308	32
685	141739	4320	6.8	108	33
686	141773	4154	16.8	267	34
687	141829	4628	11.1	177	31
688	141938	6322	5.6	89	22
689	142017	5484	2.3	37	26
690	142089	5310	17.7	282	27
691	142127	5618	20.6	329	25
692	142206	4636	7.5	120	31
693	142260	4435	7.7	123	32
694	142336	3367	58	925	42
695	142396	3635	6.4	102	39
696	142454	4787	9.7	155	30
697	142492	4017	20	319	35
698	142534	3721	12	191	38
699	142564	6362	18.3	291	22
700	142671	4193	13.2	210	34
701	142703	5098	17.6	280	28
702	142751	3438	6.7	107	42
703	142776	3724	5.8	93	38
704	142808	6093	3.7	58	23
705	142840	3047	4.6	74	47
706	142914	4019	35.6	567	36
707	143002	3390	55	877	42
708	143063	4174	5.7	91	34
709	143131	3501	18.6	297	41
710	143241	4205	18	286	34
711	143315	3339	22.6	361	43
712	143336	6261	17.7	282	23
713	143410	4980	11.3	180	29
714	143435	3839	17.7	283	37
715	143486	4422	23.2	370	32
716	143545	3718	4.2	67	39
717	143583	4462	5.3	85	32
718	143626	6077	10.5	168	24
719	143657	5236	5.6	90	27
720	143706	5641	10.5	167	25
721	143733	4543	6.7	107	32
722	143771	4418	6	95	33
723	143821	4477	9.8	156	32
724	143896	3360	4.6	73	43
725	143943	6726	15.2	243	21
726	143986	4076	7.8	124	35
727	144019	4881	7.8	125	30
728	144057	5588	1.7	28	26
729	144080	3616	1.8	29	40
730	144175	5663	24.8	396	25
731	144242	5614	6.6	105	26
732	144297	5623	20.6	328	26
733	144338	5484	4.7	76	26
734	144372	4357	2.8	45	33
735	144450	6639	29.4	469	22
736	144488	5651	8.2	131	26
737	144520	4404	4.4	70	33
738	144555	3628	5.8	92	40
739	144647	3349	12.8	204	43
740	144718	4155	13.9	222	35
741	144806	4687	43.1	688	31
742	144832	5512	25.8	412	26
743	144883	4740	2.9	45	31
744	144943	3957	5.8	92	37
745	145060	5110	41.5	662	28
746	145087	4638	35.7	570	31
747	145191	4347	35.8	570	33
748	145218	6089	27.3	435	24
749	145283	5736	4.3	69	25
750	145328	5637	6	95	26
751	145365	2297	7.8	125	63
752	145412	3465	11.9	189	42
753	145469	4210	19.4	309	35
754	145562	4436	17.3	276	33
755	145636	4719	6.4	102	31
756	145669	5815	22.9	365	25
757	145692	5193	24.7	394	28
758	145718	5799	13.2	211	25
759	145782	3734	43.8	698	39
760	145869	4792	13.1	210	30
761	145919	5033	37.7	601	29
762	146016	4506	13.8	220	32
763	146060	5720	10.2	162	26
764	146097	4089	4.8	76	36
765	146140	5222	23.1	368	28
766	146291	5607	6.2	98	26
767	146402	4095	36.8	587	36
768	146478	6193	10.9	173	24
769	146505	4967	20.3	324	29
770	146530	3907	17.9	285	38
771	146592	3909	4.3	68	38
772	146656	4278	30.3	483	34
773	146692	6887	16.7	267	21
774	146724	5999	5.6	90	24
775	146789	5737	10.6	168	26
776	146825	4549	3	48	32
777	146895	6193	77.3	1231	24
778	147026	3842	7.7	123	38
779	147085	4052	7.5	120	36
780	147135	4173	28.7	457	35
781	147180	4356	22.9	366	34
782	147252	4189	31	494	35
783	147328	5715	4.5	71	26
784	147386	5332	82.4	1314	28
785	147464	4209	2.6	41	35
786	147517	3510	0.8	13	42
787	147568	5466	8.2	131	27
788	147625	6602	30.4	484	22
789	147664	4724	18.5	294	31
790	147693	4801	32.2	514	31
791	147742	3708	6.3	100	40
792	147777	6811	27.4	437	22
793	147804	5346	15.1	240	28
794	147901	5150	9.7	155	29
795	148013	5741	18.8	299	26
796	148039	4347	26.6	424	34
797	148066	4646	26.4	420	32
798	148110	3963	12.7	202	37
799	148208	3962	2.3	37	37
800	148275	6140	7.9	126	24
801	148314	6390	3.4	54	23
802	148338	5202	4.4	69	29
803	148404	3957	15.1	241	38
804	148469	6681	18.1	289	22
805	148501	4606	11.8	188	32
806	148524	5295	10.7	170	28
807	148612	4214	24.8	395	35
808	148705	4794	6.9	109	31
809	148724	4533	8.1	129	33
810	148831	6081	8.7	138	24
811	148907	5558	45.5	726	27
812	148943	4880	25.5	407	31
813	148983	6156	20.2	321	24
814	149007	3346	25.1	400	45
815	149042	6274	41.8	666	24
816	149116	4544	10.1	162	33
817	149134	4537	11.7	186	33
818	149178	4583	4.3	69	33
819	149278	4681	19.3	308	32
820	149320	5212	43.8	699	29
821	149343	4413	50.4	804	34
822	149438	3751	7.1	113	40
823	149486	7345	21.6	344	20
824	149550	5773	15.7	250	26
825	149622	5477	52.8	841	27
826	149655	5581	23.3	372	27
827	149747	4188	36.8	586	36
828	149828	3692	7.4	118	41
829	149874	2985	8.1	129	50
830	149915	3642	10.4	167	41
831	149980	4199	9.2	147	36
832	150019	5459	8.7	139	27
833	150090	4624	23.5	375	32
834	150109	5602	24.6	392	27
835	150177	6079	9.6	153	25
836	150222	7238	26.8	427	21
837	150284	4561	11.8	189	33
838	150357	3167	5.7	91	47
839	150409	3412	5.9	94	44
840	150468	4586	6.2	98	33
841	150495	5837	5.7	91	26
842	150521	5301	10.5	167	28
843	150604	3307	19.6	312	46
844	150714	4552	8.9	142	33
845	150743	4037	7.4	118	37
846	150795	5924	17.4	277	25
847	150852	2387	7.4	118	63
848	150894	4575	16.2	258	33
849	150917	5955	10.9	174	25
850	150977	4458	9.2	147	34
851	151012	3310	4.5	71	46
852	151054	4642	3.4	55	33
853	151098	4701	2.9	47	32
854	151161	7210	5.2	82	21
855	151243	3694	14	223	41
856	151288	2654	14.9	238	57
857	151412	6005	49.3	786	25
858	151510	5877	1.8	29	26
859	151600	4661	38.6	615	33
860	151759	3909	21.1	336	39
861	151838	5082	7.4	119	30
862	151914	4560	57.5	917	33
863	152044	4269	18	287	36
864	152079	3975	12.1	193	38
865	152122	4636	4.9	78	33
866	152218	6764	29.5	471	23
867	152279	2794	15.9	253	54
868	152334	6100	21.9	349	25
869	152409	4681	14.8	235	33
870	152438	5003	9.4	149	30
871	152478	4936	12.7	203	31
872	152588	6307	62.8	1001	24
873	152663	3702	28.7	458	41
874	152707	3323	43.7	697	46
875	152748	6059	34.7	553	25
876	152785	4578	20	319	33
877	152843	6684	36.7	586	23
878	152939	5693	25.1	400	27
879	152975	4873	11.5	183	31
880	152997	4876	9	144	31
881	153106	3941	23	367	39
882	153142	4374	27.8	443	35
883	153184	4908	17.3	276	31
884	153236	5894	68	1084	26
885	153294	4850	13.4	213	32
886	153373	4096	43.2	688	37
887	153463	4933	10.6	169	31
888	153493	4648	14.1	225	33
889	153528	6832	13.4	214	22
890	153588	3434	11.2	178	45
891	153646	3935	13	208	39
892	153731	5806	10.3	164	26
893	153818	3413	1.1	18	45
894	153910	3941	11.1	177	39
895	153930	5649	13.8	219	27
896	153982	4617	2.4	38	33
897	154031	6555	3.2	51	24
898	154102	4227	15.5	247	36
899	154218	2521	2.2	35	61
900	154243	5983	1.7	28	26
901	154294	4226	5.2	83	37
902	154327	5075	11.7	186	30
903	154453	3468	3.3	52	45
904	154513	4605	6.7	107	34
905	154562	6595	4.2	66	23
906	154597	5495	8.2	131	28
907	154691	6000	21.2	338	26
908	154757	4242	6.6	105	36
909	154795	5494	10	160	28
910	154895	4791	55.9	890	32
911	154956	4950	17.3	276	31
912	155075	5135	71.3	1136	30
913	155163	5848	19.4	309	27
914	155193	5726	21	335	27
915	155238	4837	22.7	362	32
916	155272	5231	34.9	556	30
917	155344	6929	34.4	548	22
918	155383	5464	52.3	833	28
919	155459	5121	76.8	1224	30
920	155506	5529	20.8	332	28
921	155535	3493	26.9	429	45
922	155573	3603	43.6	696	43
923	155605	3905	38.9	620	40
924	155635	3338	37	590	47
925	155685	4159	29.9	476	37
926	155742	3608	12.2	195	43
927	155784	4704	17	272	33
928	155866	4769	50.5	804	33
929	155920	4752	30.8	491	33
930	155977	3533	12.2	194	44
931	156008	4364	10.6	168	36
932	156083	4162	26.8	427	38
933	156110	4758	33.6	535	33
934	156131	5070	30.2	481	31
935	156175	4741	10.5	167	33
936	156263	3916	24.5	390	40
937	156307	5534	20.3	324	28
938	156370	2677	6.7	107	58
939	156434	2476	7.9	126	63
940	156496	3157	3.7	60	50
941	156608	4458	2.2	36	35
942	156643	5071	2.7	43	31
943	156724	4104	3.4	54	38
944	156755	6080	2.3	37	26
945	156778	5159	3.3	53	30
946	156824	6285	5.6	89	25
947	156884	3300	11.8	188	48
948	156916	5228	9.9	158	30
949	156952	4231	10.3	164	37
950	157003	4510	15.6	249	35
951	157082	3948	4.2	67	40
952	157123	4602	4.2	67	34
953	157208	4791	3.9	62	33
954	157310	4794	4	63	33
955	157360	5595	1.8	28	28
956	157389	5021	2.8	45	31
957	157435	4652	7.1	114	34
958	157462	3952	6.9	109	40
959	157524	5471	26.1	416	29
960	157568	3783	9.3	149	42
961	157652	4286	29.1	464	37
962	157785	4878	24.8	396	32
963	157851	5011	21	334	31
964	157921	4211	23.4	373	38
965	157955	4089	16.2	258	39
966	158006	5284	39.8	635	30
967	158053	3662	32.4	516	43
968	158089	3684	38.2	608	43
969	158121	3969	29.4	468	40
970	158189	2931	79.2	1263	54
971	158228	3971	80.4	1282	40
972	158277	4272	33.1	528	37
973	158308	6140	20.9	333	26
974	158335	5239	38.4	612	30
975	158361	5631	34	542	28
976	158397	4117	78.1	1245	38
977	158486	4168	35.7	568	38
978	158519	4939	16.9	269	32
979	158615	4483	16	255	35
980	158641	3266	17.5	280	49
981	158704	6413	44.2	704	25
982	158739	4406	18.3	292	36
983	158774	7519	22.9	365	21
984	158859	2590	15.7	250	61
985	158956	3339	5.8	92	48
986	159036	3742	10.8	172	43
987	159086	3980	20	318	40
988	159127	6234	57.3	914	26
989	159249	4867	5.5	87	33
990	159282	3771	7.5	120	42
991	159325	4653	17.4	277	34
992	159385	2977	3	48	54
993	159451	4906	4	63	33
994	159487	6222	11.2	179	26
995	159518	4948	19.6	313	32
996	159573	3495	19	303	46
997	159611	4217	21.3	340	38
998	159691	4699	14.7	234	34
999	159741	3722	6.3	100	43
1000	159826	3647	6.3	100	44
1001	159855	4789	5.8	92	33
1002	159888	5818	4.2	67	27
1003	159950	5687	1.2	19	28
1004	159973	4266	1.2	19	38
1005	160033	4504	2.1	34	36
1006	160094	4460	3.4	55	36
1007	160131	5326	8.6	137	30
1008	160169	5647	2.6	41	28
1009	160212	3649	7.4	118	44
1010	160327	3932	5.1	82	41
1011	160502	6926	2680.6	42732	23
1012	160634	8282	700.3	11164	19
1013	160763	5419	404.2	6444	30
1014	160816	5008	3.8	61	32
1015	160897	7561	198.9	3170	21
1016	161029	7011	1070.9	17072	23
1017	161168	8569	69.5	1108	19
1018	161213	8525	172.9	2757	19
1019	161290	7252	346.8	5529	22
1020	161348	7252	36.6	583	22
1021	161433	5675	71.7	1142	28
1022	161515	5285	16.8	267	31
1023	161564	5150	254.7	4060	31
1024	161668	4100	35.2	561	39
1025	161747	5625	138.6	2210	29
1026	161824	5746	51.9	827	28
1027	161880	4568	2.5	40	35
1028	161969	5008	32.5	518	32
1029	162096	4647	25.3	403	35
1030	162116	5144	22.2	354	32
1031	162202	4341	9.6	154	37
1032	162274	6875	7.2	115	24
1033	162356	4479	6.9	110	36
1034	162386	5214	6.6	105	31
1035	162521	6396	14.3	228	25
1036	162553	6663	6	95	24
1037	162592	5154	2.4	39	32
1038	162629	6355	10.9	173	26
1039	162672	4671	3.8	60	35
1040	162738	3966	3.3	52	41
1041	162795	6025	9.5	151	27
1042	162878	5144	3.8	61	32
1043	162909	4965	3	49	33
1044	162932	4966	3	48	33
1045	162962	7126	4.4	71	23
1046	163015	5794	3.5	56	28
1047	163048	4404	6.2	99	37
1048	163086	6298	11.9	190	26
1049	163170	6973	30.6	488	23
1050	163257	5305	76.9	1225	31
1051	163308	3908	50.5	804	42
1052	163342	4938	37.9	605	33
1053	163475	4359	15.4	246	38
1054	163559	3375	123	1961	48
1055	163587	6432	93.8	1495	25
1056	163670	5622	22.5	359	29
1057	163700	4378	44.1	703	37
1058	163740	6032	62.8	1000	27
1059	163753	5196	68.4	1090	32
1060	163806	3678	18.1	288	45
1061	163860	4028	35.9	573	41
1062	163904	3597	33.5	534	46
1063	163950	5768	44.1	703	28
1064	163991	3474	37.5	597	47
1065	164038	3901	40.1	639	42
1066	164162	4558	30	478	36
1067	164204	4924	7.5	119	33
1068	164299	5587	17.4	277	29
1069	164335	4237	30.3	483	39
1070	164399	3006	11.9	190	55
1071	164505	6996	38.1	608	24
1072	164548	6383	48.6	774	26
1073	164603	3902	9.4	150	42
1074	164631	5345	8.8	141	31
1075	164741	3661	9.5	152	45
1076	164816	6012	8.1	130	27
1077	164850	5961	3.8	60	28
1078	164895	5365	8.4	134	31
1079	164947	5695	11	176	29
1080	164975	4564	16	254	36
1081	165017	5046	6.5	103	33
1082	165087	4428	1.9	31	37
1083	165134	3408	5.1	82	48
1084	165183	5297	8	128	31
1085	165259	3200	8.7	139	52
1086	165306	5558	5.6	89	30
1087	165408	5080	10.3	164	33
1088	165432	4356	12.3	196	38
1089	165487	3591	19.8	315	46
1090	165581	4156	5.9	94	40
1091	165614	4811	7.6	122	34
1092	165649	4442	24	383	37
1093	165712	5109	7.3	116	32
1094	165772	3536	9.6	153	47
1095	165820	4072	27.1	432	41
1096	165868	3802	31.1	496	44
1097	165901	5223	28.1	447	32
1098	165940	4513	29	462	37
1099	165976	4045	33.2	530	41
1100	166035	4185	10.8	172	40
1101	166099	5906	28.9	461	28
1102	166136	3475	36.3	579	48
1103	166171	5199	38.4	612	32
1104	166235	4134	31.3	499	40
1105	166340	4113	37.7	601	40
1106	166405	5865	34.7	553	28
1107	166487	5795	39.1	623	29
1108	166576	3221	25	399	52
1109	166666	5058	16.5	263	33
1110	166727	6318	19.7	315	26
1111	166784	4644	20.7	330	36
1112	166818	4009	21.7	346	42
1113	166875	6256	12.9	206	27
1114	166932	5164	17.7	282	32
1115	166957	3749	19.5	311	45
1116	166987	6271	17.8	285	27
1117	167025	5067	7.5	119	33
1118	167111	7147	15.6	249	23
1119	167133	4888	18.5	295	34
1120	167236	4210	37.8	603	40
1121	167292	5482	20.8	332	31
1122	167363	3466	17.5	280	48
1123	167399	3656	15.5	247	46
1124	167436	4631	13.4	213	36
1125	167484	4484	9.3	148	37
1126	167519	4204	8	128	40
1127	167542	4676	8.8	140	36
1128	167646	4732	16.4	262	35
1129	167704	3757	10.9	174	45
1130	167736	6506	7.1	113	26
1131	167778	5359	33.8	539	31
1132	167849	4822	6.5	103	35
1133	167934	5118	10.2	162	33
1134	167983	5491	23.3	372	31
1135	168029	5426	24.3	388	31
1136	168122	5758	14.9	237	29
1137	168151	4098	13.8	219	41
1138	168202	6923	11.5	183	24
1139	168245	3704	7.5	120	45
1140	168282	4120	6.4	102	41
1141	168329	6653	24	383	25
1142	168356	4798	30.7	490	35
1143	168387	4449	41.4	660	38
1144	168487	5329	6.8	108	32
1145	168562	5157	9	143	33
1146	168612	6961	15.2	242	24
1147	168664	5484	14.1	224	31
1148	168722	2982	9.6	153	57
1149	168799	4917	54.1	862	34
1150	168943	4247	28.7	458	40
1151	169095	4256	36.6	583	40
1152	169254	3225	37.4	596	52
1153	169363	4679	42	670	36
1154	169528	4150	35.2	560	41
1155	169656	3645	50	797	47
1156	169705	4282	54.7	872	40
1157	169737	5173	33.5	534	33
1158	169759	6585	30.7	489	26
1159	169828	5176	19	303	33
1160	169944	4742	28	446	36
1161	169970	4421	34.4	548	38
1162	170006	3560	15.8	252	48
1163	170082	4810	44.8	714	35
1164	170168	5079	97.9	1560	34
1165	170347	3399	43.2	689	50
1166	170399	4817	33.2	529	35
1167	170504	4301	8.5	136	40
1168	170547	5237	9.8	157	33
1169	170583	3615	15.1	241	47
1170	170649	4280	23.3	372	40
1171	170703	4046	7.2	115	42
1172	170783	5234	11.2	179	33
1173	170870	3549	11.2	178	48
1174	171008	4628	20.1	321	37
1175	171076	6374	5.1	81	27
1176	171139	4528	13.9	221	38
1177	171187	4117	10.5	167	42
1178	171233	5066	9.3	148	34
1179	171261	3045	9.5	151	56
1180	171299	5052	10.1	161	34
1181	171351	4625	8.8	140	37
1182	171384	3335	9.8	156	51
1183	171441	4510	5.2	84	38
1184	171462	4303	6	96	40
1185	171499	4065	6	95	42
1186	171526	4134	6.5	103	41
1187	171603	6656	10.9	174	26
1188	171634	4068	14.8	236	42
1189	171671	3662	23.8	380	47
1190	171755	4628	35.6	567	37
1191	171883	4458	40.8	651	39
1192	171944	4398	17.2	275	39
1193	171981	4586	9.7	155	38
1194	172018	2949	10.3	164	58
1195	172116	5245	33.7	537	33
1196	172150	3868	39.4	628	45
1197	172191	4140	27.8	443	42
1198	172322	4117	50.8	810	42
1199	172384	3911	33.1	528	44
1200	172420	4249	26.4	421	41
1201	172451	4801	31.8	506	36
1202	172480	5257	17	271	33
1203	172522	4834	37	590	36
1204	172612	4210	37	590	41
1205	172640	4819	31.9	509	36
1206	172739	7128	19.7	313	24
1207	172785	6742	13.1	208	26
1208	172811	4337	17.4	277	40
1209	172888	4598	20.9	333	38
1210	172927	4531	17.6	280	38
1211	173001	6934	24.4	389	25
1212	173032	3928	14.9	238	44
1213	173106	5509	23.4	374	31
1214	173158	4104	58.7	935	42
1215	173277	4261	8.7	139	41
1216	173329	6842	15.2	243	25
1217	173393	5409	23.9	381	32
1218	173422	4513	21.4	341	38
1219	173533	5500	8	128	32
1220	173554	4209	8.6	137	41
1221	173602	3845	16.1	257	45
1222	173649	4583	28.1	448	38
1223	173669	4478	26	414	39
1224	173718	4118	15	240	42
1225	173800	4711	24.1	384	37
1226	173897	3323	7	112	52
1227	173948	4096	16.3	260	42
1228	173997	3673	12.5	199	47
1229	174024	6830	8.7	139	25
1230	174096	4532	8.5	136	38
1231	174135	5322	19.9	317	33
1232	174202	4662	17.1	272	37
1233	174238	5686	26	415	31
1234	174359	5317	8.8	140	33
1235	174384	6200	7.8	125	28
1236	174418	3789	10.2	163	46
1237	174457	5300	26.3	419	33
1238	174509	3447	16	254	51
1239	174582	3859	56.6	902	45
1240	174688	2599	8.5	136	67
1241	174824	7059	51.6	822	25
1242	174868	3449	22.7	362	51
1243	174922	3816	20.6	328	46
1244	174949	4863	26.1	416	36
1245	175021	4210	19.4	309	42
1246	175062	6224	25.7	410	28
1247	175094	5195	43.3	690	34
1248	175166	4828	19	303	36
1249	175196	5218	14.4	229	34
1250	175246	5196	10.9	173	34
1251	175271	5717	15	239	31
1252	175363	4424	33.3	531	40
1253	175431	5365	74.8	1192	33
1254	175460	6269	42.2	673	28
1255	175516	6405	55.2	880	27
1256	175584	5449	17.3	276	32
1257	175623	4738	30.3	482	37
1258	175684	4980	30.8	492	35
1259	175790	5918	51	813	30
1260	175934	7539	52.6	838	23
1261	175984	3773	15.2	242	47
1262	176032	3226	13.9	222	55
1263	176098	4944	34.5	550	36
1264	176149	6263	8.1	129	28
1265	176189	2954	8.8	140	60
1266	176232	4662	9.7	155	38
1267	176286	5417	56.5	900	33
1268	176335	6270	11.2	179	28
1269	176377	5610	25.1	399	31
1270	176430	3132	19.8	315	56
1271	176511	4707	20.9	333	38
1272	176544	3271	29.8	476	54
1273	176590	4324	15.2	242	41
1274	176663	4366	6.6	105	40
1275	176704	5302	14.9	238	33
1276	176752	5594	5.5	88	32
1277	176815	5842	127.7	2035	30
1278	176844	6481	106.6	1700	27
1279	176910	4645	8.1	129	38
1280	176945	6863	5.5	87	26
1281	176979	5756	14.7	234	31
1282	177024	4713	10.9	174	38
1283	177064	4444	9.3	148	40
1284	177128	3023	11.4	181	59
1285	177259	5567	40.6	647	32
1286	177334	5380	9.2	147	33
1287	177399	3629	30.5	487	49
1288	177458	4157	11.6	185	43
1289	177534	7102	24.2	385	25
1290	177588	6261	9.7	155	28
1291	177686	5143	76.8	1225	35
1292	177836	5944	8.9	143	30
1293	177867	5421	4.5	71	33
1294	177911	5177	9.2	147	34
1295	177934	5423	8.5	135	33
1296	177990	5204	71.5	1141	34
1297	178130	3747	15.3	245	48
1298	178158	4937	23.6	376	36
1299	178199	3812	15.2	243	47
1300	178283	4244	75	1195	42
1301	178336	5285	30.9	493	34
1302	178387	3888	24.8	396	46
1303	178431	3261	24.5	391	55
1304	178462	5439	20.7	330	33
1305	178487	6388	20.8	331	28
1306	178596	4913	45.6	726	36
1307	178630	4885	69.5	1108	37
1308	178715	5602	34.2	545	32
1309	178769	5058	78	1244	35
1310	178892	4828	52.1	831	37
1311	178933	6461	19.7	313	28
1312	179017	5943	10.3	164	30
1313	179077	6361	23.8	380	28
1314	179118	5959	26.4	420	30
1315	179177	6387	36.4	581	28
1316	179205	4496	23.8	380	40
1317	179244	6290	18.6	297	28
1318	179304	6223	13.7	218	29
1319	179348	6047	21	334	30
1320	179374	6521	20.7	330	28
1321	179432	6214	16.5	262	29
1322	179476	4128	22.7	362	43
1323	179524	4515	28.3	450	40
1324	179617	5024	12.4	198	36
1325	179652	5393	36.5	582	33
1326	179805	5404	25	399	33
1327	179872	3206	18.4	293	56
1328	179904	4401	18.3	292	41
1329	179975	3322	48.4	771	54
1330	180131	4074	27.6	439	44
1331	180173	5718	25.8	411	32
1332	180227	5944	8.3	132	30
1333	180310	7357	23	367	25
1334	180361	5538	31.1	496	33
1335	180439	5559	13.2	211	32
1336	180496	5235	39.3	627	34
1337	180564	3028	27.7	441	60
1338	180608	4858	15	239	37
1339	180640	4534	10.4	166	40
1340	180721	6426	21.6	345	28
1341	180746	7570	48.9	780	24
1342	180847	5166	42.8	682	35
1343	180934	4819	21.5	343	38
1344	180997	3705	19.3	307	49
1345	181024	5359	22.2	353	34
1346	181102	4077	5.3	85	44
1347	181187	4512	41.4	660	40
1348	181306	6668	42.4	676	27
1349	181366	3809	21.6	345	48
1350	181420	5028	23.4	373	36
1351	181446	2772	29.2	466	65
1352	181498	4162	22.3	356	44
1353	181538	4386	25.8	411	41
1354	181571	6456	12.5	200	28
1355	181632	4844	8.3	133	38
1356	181690	4687	26.7	426	39
1357	181727	4891	17.5	279	37
1358	181771	3288	12.5	199	55
1359	181807	5679	10.5	168	32
1360	181901	5280	32	511	34
1361	181986	4415	26.7	425	41
1362	182054	3929	25.6	408	46
1363	182121	4036	40.8	650	45
1364	182153	4790	26	414	38
1365	182205	3301	25.5	407	55
1366	182265	3982	20.4	325	46
1367	182381	4228	30.9	493	43
1368	182414	5462	27	430	33
1369	182444	6544	11.7	187	28
1370	182516	4806	23.1	368	38
1371	182558	3793	30	479	48
1372	182591	3720	33.2	529	49
1373	182638	4708	36.6	584	39
1374	182703	4890	37.5	598	37
1375	182788	5282	6.5	104	35
1376	182859	6705	9.9	157	27
1377	182933	4726	12.6	201	39
1378	183043	5117	43.8	698	36
1379	183122	4704	8.6	137	39
1380	183180	5093	18.8	300	36
1381	183233	3909	13.3	212	47
1382	183304	5818	22.1	352	32
1383	183337	6621	12.2	195	28
1384	183400	7114	10.3	165	26
1385	183465	4272	27.3	435	43
1386	183542	3798	13.9	221	48
1387	183602	4241	11.2	178	43
1388	183628	4937	9	144	37
1389	183664	4272	9.1	145	43
1390	183708	3467	11.2	178	53
1391	183757	4244	9	143	43
1392	183869	2492	47.3	755	74
1393	183946	2849	26.7	425	65
1394	183985	4419	18.1	289	42
1395	184039	5986	18.2	290	31
1396	184082	4598	7.8	124	40
1397	184151	5356	40.7	649	34
1398	184188	5762	25.7	410	32
1399	184262	4936	28	447	37
1400	184294	4697	34.5	549	39
1401	184331	5112	32.5	519	36
1402	184395	3767	23	367	49
1403	184453	4297	69	1100	43
1404	184514	6561	19.6	312	28
1405	184566	4375	35.1	559	42
1406	184626	3883	58.7	936	48
1407	184681	5325	50.4	804	35
1408	184721	3715	36.4	581	50
1409	184758	5519	27.6	440	33
1410	184795	5808	13.5	215	32
1411	184879	3836	19.1	304	48
1412	184957	6410	16.5	263	29
1413	185014	4386	14.5	232	42
1414	185049	6028	26.8	428	31
1415	185106	3590	12.8	204	52
1416	185150	4497	12.7	203	41
1417	185348	5286	23.3	371	35
1418	185419	3208	15	240	58
1419	185495	3938	31.4	501	47
1420	185553	5278	37.5	598	35
1421	185577	5771	39.2	625	32
1422	185617	4950	11.1	177	38
1423	185651	4685	11.8	188	40
1424	185679	4660	10.2	162	40
1425	185718	7072	19	303	26
1426	185809	5563	20.4	325	33
1427	185847	3795	24.3	388	49
1428	185889	4236	39.4	628	44
1429	185935	6611	8.1	130	28
1430	185967	5151	9.9	158	36
1431	186000	4018	11.9	190	46
1432	186057	4123	5.5	87	45
1433	186145	4293	33.8	539	43
1434	186224	5043	37.3	595	37
1435	186302	4463	63.8	1016	42
1436	186426	5682	37.3	595	33
1437	186459	4856	32.8	523	38
1438	186504	4681	9.4	150	40
1439	186570	4936	17.4	277	38
1440	186607	3462	21.4	341	54
1441	186662	3059	30.7	489	61
1442	186726	4464	40.4	643	42
1443	186767	6147	56.7	905	30
1444	186800	7246	32.1	511	26
1445	186828	5532	58.4	931	34
1446	186903	4085	34.4	548	46
1447	186958	6908	10.9	173	27
1448	187043	5096	10.2	163	37
1449	187091	5244	16.8	267	36
1450	187187	4992	15.8	251	38
1451	187217	4654	22.8	363	40
1452	187275	3941	27.4	436	48
1453	187378	4703	38.9	621	40
1454	187458	6135	16.9	270	31
1455	187532	4982	18.5	295	38
1456	187563	7129	13.7	219	26
1457	187679	4710	37.3	595	40
1458	187697	6674	37.7	601	28
1459	187723	3865	33.8	538	49
1460	187801	3422	35.6	567	55
1461	187861	4715	35.9	572	40
1462	187891	6686	27.2	433	28
1463	187939	4455	6.1	97	42
1464	187990	4037	10.8	172	47
1465	188072	2152	10	159	87
1466	188186	4386	56.2	896	43
1467	188251	6693	9.4	150	28
1468	188271	5034	11.6	185	37
1469	188332	4845	53.2	848	39
1470	188391	5350	13.6	216	35
1471	188438	5048	6.7	106	37
1472	188487	3442	14.5	231	55
1473	188525	6703	11.1	178	28
1474	188645	3669	35.7	569	51
1475	188790	4239	50.6	806	45
1476	188824	3658	61.8	986	52
1477	188929	6717	8.2	131	28
1478	188980	5433	16.9	270	35
1479	189026	3852	15.4	245	49
1480	189110	4693	65.9	1051	40
1481	189218	5366	8.2	131	35
1482	189286	4392	66.6	1061	43
1483	189425	5707	28.5	455	33
1484	189450	4750	37.7	602	40
1485	189525	4704	9.8	156	40
1486	189582	5262	20.2	322	36
1487	189609	4531	37	590	42
1488	189697	4260	10.1	161	45
1489	189753	3681	21	334	52
1490	189794	5195	42.6	680	37
1491	189906	4052	13.6	217	47
1492	189994	3519	26.2	417	54
1493	190071	5960	38.4	612	32
1494	190147	3385	17.4	277	56
1495	190189	6762	13.4	213	28
1496	190208	4765	15.1	242	40
1497	190274	5481	27.9	444	35
1498	190302	4780	26.1	416	40
1499	190373	5510	24.2	386	35
1500	190443	4553	63	1004	42
1501	190535	3765	59.5	948	51
1502	190640	6046	6.9	110	32
1503	190688	4536	19.7	315	42
1504	190729	2967	22.7	362	64
1505	190771	5161	25	399	37
1506	190803	5088	22.3	355	38
1507	190831	4285	29.8	474	45
1508	190893	3367	22.4	356	57
1509	190942	6169	46.4	739	31
1510	190984	5562	51.8	826	34
1511	191053	5695	20.7	329	34
1512	191159	3904	12.1	192	49
1513	191214	4799	6.2	99	40
1514	191258	6030	15.7	251	32
1515	191351	5250	50	797	36
1516	191404	3517	81.4	1298	54
1517	191478	5463	26.4	420	35
1518	191576	7288	46.2	737	26
1519	191610	3366	17.9	286	57
1520	191684	4336	15.3	245	44
1521	191762	4930	11.1	177	39
1522	191807	3087	11.8	188	62
1523	191893	5844	36.4	580	33
1524	192037	5794	40.7	649	33
1525	192079	4721	18.1	288	41
1526	192163	4823	10.5	167	40
1527	192193	5239	12.8	203	37
1528	192236	6680	21.9	349	29
1529	192269	4826	16.4	261	40
1530	192330	4705	33.8	539	41
1531	192362	3951	34.9	557	49
1532	192415	5537	46.8	745	35
1533	192469	3815	27	431	50
1534	192524	3408	14.3	228	56
1535	192569	5869	9.4	150	33
1536	192602	6821	16.4	262	28
1537	192681	3071	37.6	599	63
1538	192707	4454	51.1	815	43
1539	192757	3409	45.2	721	57
1540	192846	3686	8.3	133	52
1541	192910	3400	33.7	537	57
1542	193077	7128	31.3	498	27
1543	193141	4729	14.8	236	41
1544	193175	4869	14	224	40
1545	193250	3364	48.3	769	57
1546	193294	4841	52.6	838	40
1547	193326	7513	83.4	1329	26
1548	193485	7505	16.4	261	26
1549	193526	4816	23.8	379	40
1550	193553	4685	32.5	519	41
1551	193590	5162	18.4	294	38
1552	193630	5599	38.6	615	35
1553	193722	5166	40.3	642	37
1554	193795	3345	63.4	1011	58
1555	193872	4425	27.5	439	44
1556	193971	5173	20.9	334	38
1557	194006	6410	50.8	810	30
1558	194114	5955	37.7	600	33
1559	194140	4873	22.7	361	40
1560	194181	4316	19.7	314	45
1561	194283	5608	28.5	455	35
1562	194348	6284	21.4	342	31
1563	194385	7200	23.5	375	27
1564	194451	4548	20	319	43
1565	194491	4177	20.9	334	47
1566	194564	6992	24.6	392	28
1567	194612	5872	24.2	386	33
1568	194664	4060	18.6	296	48
1569	194695	4450	16.2	259	44
1570	194745	5011	24.5	391	39
1571	194836	6000	30.3	483	32
1572	194863	5023	18.8	299	39
1573	194927	5349	34.4	549	36
1574	194980	4572	28.5	454	43
1575	195020	7227	31.3	499	27
1576	195131	7335	47.8	762	27
1577	195180	5708	37.6	599	34
1578	195214	5196	19	302	38
1579	195252	5207	14	223	38
1580	195278	3472	13.8	220	56
1581	195331	5452	23.6	376	36
1582	195368	2929	17.9	285	67
1583	195432	6516	29.8	475	30
1584	195485	5387	36.7	585	36
1585	195516	5169	65.8	1049	38
1586	195538	6952	48.2	768	28
1587	195593	7363	19	303	27
1588	195683	5400	23.9	382	36
1589	195729	4812	30.9	493	41
1590	195766	5001	31.4	501	39
1591	195807	4177	20.9	334	47
1592	195857	5235	14.7	234	37
1593	195931	3670	15.5	246	53
1594	195990	7300	40.5	646	27
1595	196037	4740	19	303	41
1596	196083	3984	4.5	72	49
1597	196163	5260	45.7	729	37
1598	196205	3349	39.5	630	59
1599	196284	4496	11.7	186	44
1600	196337	3930	36.3	579	50
1601	196379	5272	41	653	37
1602	196508	3689	54.8	874	53
1603	196651	5526	21.3	340	36
1604	196704	4107	20.6	328	48
1605	196734	5553	17.3	276	35
1606	196836	5341	31.8	507	37
1607	196869	4305	64.7	1032	46
1608	196976	4768	28.1	447	41
1609	197007	4430	36.2	576	44
1610	197039	4200	39	621	47
1611	197104	4961	23.4	373	40
1612	197137	5780	35.3	562	34
1613	197234	4416	28.2	450	45
1614	197284	4951	28.6	455	40
1615	197319	3064	21	334	64
1616	197370	5785	14.3	228	34
1617	197411	4081	7	111	48
1618	197494	4671	37	591	42
1619	197602	4092	27.6	439	48
1620	197704	5306	35.1	559	37
1621	197758	4711	41.8	667	42
1622	197793	3494	34.3	547	57
1623	197844	4342	31.6	503	46
1624	197884	3844	28.7	457	51
1625	197932	5568	22.8	363	36
1626	197959	4445	29	463	45
1627	197986	5586	24.3	388	35
1628	198021	6035	12.3	196	33
1629	198057	4971	11.8	187	40
1630	198106	3980	31.6	504	50
1631	198160	3020	39.4	629	66
1632	198192	4578	33.3	531	43
1633	198239	2805	25.5	406	71
1634	198321	4645	24.5	391	43
1635	198367	4920	23.2	370	40
1636	198412	5729	70.4	1123	35
1637	198478	3768	12.9	206	53
1638	198533	5130	21.9	350	39
1639	198583	5445	48	765	36
1640	198644	3960	17.2	274	50
1641	198685	7707	6.5	104	26
1642	198733	6383	20.3	323	31
1643	198760	3810	32.1	511	52
1644	198799	6059	20.3	324	33
1645	198832	3982	24.8	395	50
1646	198893	4950	22	351	40
1647	198950	5462	12.7	202	36
1648	199009	3963	5.2	84	50
1649	199085	6177	72	1148	32
1650	199132	6069	82.9	1322	33
1651	199184	5774	44.7	713	34
1652	199222	3701	21.7	345	54
1653	199332	5818	11.9	190	34
1654	199360	5182	21.2	338	38
1655	199406	5147	55.7	887	39
1656	199466	5149	47.4	756	39
1657	199540	4131	9.1	144	48
1658	199644	6007	9.8	156	33
1659	199669	5011	11.3	180	40
1660	199719	9468	8	127	21
1661	199746	4510	11.1	177	44
1662	199854	6406	13.5	215	31
1663	199928	3716	93.6	1492	54

## Sheet: Antibody-peptide conjugate
#	m/z	Res.	S/N	I	FWHM		Assigned antibody assemblies
1	100021	2367	305.9	5860	42		Assembly	Mass	Intensity	% Intensity
8	100504	3009	71.8	1375	33		HC2LC2-Peptide4	153817	362711	83.1999
9	100564	2216	192.1	3679	45		HC2LC2-Peptide3-Strep1	155616	65732	15.0778
10	100608	2174	279.9	5362	46		HC2LC2-Peptide2-Strep2	157415	7508	1.72221
11	100678	3580	153.8	2946	28		HC2LC2-Peptide1-Strep3	159213	n.d.
19	101577	2637	98.6	1889	39		HC2LC2-Strep4	161012	n.d.
20	101651	1763	251.5	4817	58
21	101674	3189	255.6	4896	32		HC2LC1-Peptide3	128281	51331	100
26	102145	3897	1136	21762	26		HC2LC1-Peptide2-Strep1	130080	n.d.
28	102555	2577	65.7	1259	40		HC2LC1-Peptide1-Strep2	131879	n.d.
29	102603	1900	82.1	1572	54		HC2LC1-Strep3	133678	n.d.
30	102744	3874	4984.7	95488	27
31	102838	3925	182.8	3501	26		HC2-Peptide2	102746	95488	100
41	103655	2579	56.6	1084	40		HC2-Peptide1-Strep1	104545	n.d.
53	104276	3635	206	3946	29		HC2-Strep2	106344	n.d.
60	104803	3744	157.9	3025	28
65	105181	3752	53.1	1018	28		HC1LC1-Peptide2	76910.4	n.d.
86	106781	3260	308.7	5914	33		HC1LC1-Peptide1-Strep1	78709.3	n.d.
92	107118	3900	129.1	2473	27		HC1LC1-Strep2	80508.1	n.d.
95	107318	3200	74.1	1419	34
113	108532	2994	243.5	4664	36
120	109116	2434	249.6	4781	45
124	109434	2788	74.9	1436	39
131	109915	2286	54.1	1037	48
138	110650	3756	177.4	3398	29
149	111444	2236	63.1	1209	50
163	112789	3343	328.6	6294	34
168	113109	3041	68.1	1305	37
175	113761	2843	187.9	3599	40
177	113931	2583	111.7	2140	44
186	114642	3109	87.9	1684	37
193	115275	2913	146.1	2798	40
194	115359	2883	96.5	1849	40
201	115960	3644	94.5	1809	32
202	116074	2960	265	5076	39
232	118386	3644	60.8	1165	32
240	119174	3310	151.5	2901	36
251	119928	4559	61.4	1176	26
261	120736	2753	147.6	2827	44
270	121234	3068	81.6	1563	40
271	121294	2815	384.3	7361	43
272	121352	3337	57.9	1109	36
278	121987	2332	76.7	1469	52
282	122491	3252	175.9	3370	38
283	122527	2655	217	4158	46
288	123043	2537	487.1	9331	48
289	123139	2512	108.7	2083	49
292	123428	3018	284.2	5444	41
295	123696	3619	109.7	2101	34
296	123721	1683	126.1	2415	73
297	123766	2337	74.9	1435	53
321	125585	3318	454.3	8703	38
322	125672	2473	70	1341	51
323	125812	2115	103.2	1977	59
324	125850	3613	80.6	1544	35
335	126790	2906	98.5	1888	44
343	127681	3008	552.8	10589	42
344	127788	2765	70.6	1353	46
351	128207	3043	66.8	1280	42
352	128282	5259	2679.6	51331	24
353	128376	3701	98.2	1882	35
375	129806	3184	226.1	4331	41
380	130146	3407	65.3	1251	38
387	130610	1990	62.1	1189	66
388	130687	3519	53.8	1031	37
392	130945	4076	59.7	1144	32
399	131491	2487	53.2	1019	53
405	131954	3271	242	4635	40
410	132321	3944	80.6	1544	34
416	132717	3141	55	1053	42
426	133483	3696	89.6	1717	36
446	134659	3389	149.5	2864	40
457	135474	5762	59.1	1132	24
458	135542	3819	77.4	1482	35
466	136191	2660	197.2	3778	51
467	136286	3596	54.1	1037	38
473	136967	4518	238.4	4567	30
474	136982	4077	236.2	4524	34
492	138330	3679	256.2	4907	38
502	139299	3128	94.2	1805	45
517	140452	4123	135	2586	34
518	140474	4423	167.3	3205	32
519	140558	3661	79	1514	38
533	141609	3625	203	3889	39
535	141803	4658	55.9	1071	30
544	142581	3394	375.2	7186	42
547	142931	2881	70.9	1358	50
560	143916	2669	95.4	1827	54
561	143957	3982	55.5	1063	36
570	144694	2935	270.4	5179	49
571	144804	4113	53.5	1025	35
575	145103	2633	101.3	1941	55
576	145179	2345	82.7	1585	62
581	145560	2923	108.5	2078	50
583	145733	2524	59.8	1146	58
585	145879	3272	73.2	1403	45
590	146244	3470	169.5	3246	42
608	147913	4508	75	1436	33
609	147941	3713	74.3	1423	40
610	148019	5263	59.7	1144	28
611	148123	4514	151.4	2900	33
612	148214	2748	59.1	1131	54
613	148323	3436	86.8	1663	43
614	148414	3350	97.8	1874	44
615	148461	3351	69.3	1327	44
616	148573	3729	195	3735	40
617	148608	3018	190.5	3650	49
618	148654	3323	114.5	2193	45
619	148876	4235	117	2241	35
620	148936	3620	148.6	2846	41
621	149004	2766	110.3	2112	54
641	150806	3785	393.7	7542	40
642	150902	2927	780.8	14957	52
643	150968	4601	744.9	14269	33
644	150985	3372	722.6	13843	45
645	151074	1645	840.3	16096	92
646	151116	3793	699.2	13393	40
647	151198	3072	359.5	6886	49
648	151260	3919	195	3736	39
649	151367	4306	248.8	4765	35
650	151407	3589	288.7	5531	42
651	151548	2939	238.7	4573	52
652	151596	3593	262.7	5033	42
653	151655	4044	180.8	3464	38
654	151680	3406	184.9	3542	45
655	151718	2512	184	3524	60
656	151767	3238	175.8	3368	47
657	151798	3538	176.9	3388	43
658	151870	2403	227.6	4360	63
663	152517	6139	81.5	1562	25
672	153169	3335	99.1	1899	46
673	153209	3791	56.7	1086	40
674	153816	5452	18934.6	362711	28
675	153889	6566	2597.7	49762	23
676	153914	3641	2907.4	55695	42
677	154018	3651	860.2	16478	42
678	154055	4105	1294.8	24802	38
679	154134	4521	378.6	7253	34
680	154373	5006	542.3	10389	31
681	154448	4376	997.3	19105	35
682	154526	5080	1582.3	30310	30
683	154607	4125	926.7	17752	37
689	155361	4788	62.3	1193	32
690	155487	5425	1870.2	35826	29
691	155620	6043	1561.2	29906	26
693	156278	5986	74.8	1433	26
696	156500	5067	80.6	1544	31
697	156564	4993	59.6	1142	31
703	157096	3020	158.4	3035	52
704	157165	2467	135.4	2593	64
705	157230	2683	258.2	4946	59
706	157279	3050	256.6	4915	52
707	157377	3259	363	6954	48
708	157498	2965	896.2	17167	53
709	157608	3898	90	1724	40
710	157712	5104	96.3	1845	31
711	157852	2857	56.7	1086	55
730	159599	4141	254.3	4871	39
731	159670	2575	79.3	1519	62
732	159733	3076	135.8	2602	52
733	159848	2935	63.9	1224	54
737	160176	2243	76.9	1473	71
738	160235	2335	94.6	1812	69
740	160352	2462	73.4	1406	65
757	161760	3436	209.6	4015	47
763	162477	3967	65.1	1247	41
764	162525	4290	73.8	1413	38
773	163269	4730	57	1092	35
778	163523	4811	97.6	1869	34
782	163846	3221	173.1	3317	51
783	163886	3178	178.4	3417	52
795	164842	4376	116.6	2233	38
800	165283	3749	70.3	1346	44
807	165891	2848	77	1476	58
808	165993	4426	220.9	4231	38
809	166134	6444	71	1361	26
825	167180	4196	55.9	1072	40
835	168094	3415	171.3	3282	49
838	168500	3994	85.7	1642	42
841	168659	4870	56.3	1079	35
853	169461	4274	111.5	2136	40
854	169492	5165	114	2185	33
863	170245	3823	90.2	1728	45
864	170293	3633	72.7	1392	47
866	170502	4167	93.1	1783	41
867	170553	2851	54	1034	60
882	171789	2749	140.4	2689	62
883	171822	5626	116.8	2237	31
884	171912	5748	90	1724	30
885	171943	3995	152	2912	43
888	172357	4887	137.4	2633	35
890	172604	2390	58.5	1121	72
891	172699	3273	119.7	2293	53
912	174125	3217	58.9	1128	54
915	174512	3919	265.4	5085	45
916	174563	3613	316.4	6061	48
917	174633	2943	79	1513	59
918	174664	4335	81.1	1554	40
922	175034	3805	54.8	1050	46
928	175408	2715	135.8	2601	65
931	175800	3320	61	1169	53
937	176167	4364	62	1187	40
940	176440	4333	175.6	3364	41
941	176526	3766	56.6	1085	47
942	176610	3939	202.1	3870	45
943	176676	3587	100.6	1928	49
949	177026	3907	74.7	1430	45
966	178534	3047	58.1	1113	59
967	178575	4010	57.8	1108	45
968	178621	4768	86.3	1654	37
969	178646	5444	92.4	1771	33
970	178684	3094	132.5	2538	58
971	178745	4014	429.9	8235	45
973	178919	4896	72.2	1383	37
976	179116	4065	101.6	1947	44
978	179274	3530	100.6	1927	51
993	180334	4640	97.3	1865	39
1000	180862	3202	148.4	2842	56
1001	180893	4540	156.6	3000	40
1002	180967	4542	58.5	1120	40
1003	180998	3677	63.7	1221	49
1004	181089	5008	196.6	3766	36
1006	181275	3992	66.7	1278	45
1007	181401	3870	61.6	1179	47
1008	181435	4203	65	1245	43
1020	182164	3931	84.3	1615	46
1031	182870	3917	87.9	1684	47
1033	182995	3904	189	3621	47
1037	183400	3930	212.8	4076	47
1038	183489	3728	79.5	1523	49
1039	183596	4767	70.2	1344	39
1044	184044	2637	68	1303	70
1059	185125	3349	195.1	3738	55
1061	185379	5361	53.8	1030	35
1066	185734	3023	117.5	2250	61
1067	185820	5920	71.2	1364	31
1074	186192	6264	63.2	1211	30
1075	186200	3649	62.6	1199	51
1078	186364	3360	57.6	1104	55
1090	187276	3632	170.7	3270	52
1091	187384	3331	77.1	1477	56
1092	187421	3596	58.9	1128	52
1094	187656	2699	60.6	1160	70
1097	188006	4843	177.1	3393	39
1105	188556	5028	54.7	1049	38
1106	188577	3657	54.4	1042	52
1107	188640	2439	58	1111	77
1114	189144	3660	68.2	1306	52
1116	189371	3738	338.8	6490	51
1117	189513	3584	57.9	1110	53
1120	189872	3376	70.1	1342	56
1121	189983	4861	77.1	1477	39
1122	190019	3685	93.4	1789	52
1123	190098	4269	52.4	1005	45
1124	190137	4096	62.6	1199	46
1125	190174	3688	78.8	1510	52
1126	190340	4061	61.6	1180	47
1132	190787	4486	104	1991	43
1133	190848	3143	110.4	2115	61
1134	190947	3017	60.6	1160	63
1140	191361	5242	99.2	1900	37
1141	191390	3402	109	2087	56
1142	191533	4540	354.1	6783	42
1143	191657	4310	97.8	1874	44
1150	192229	3913	56.4	1080	49
1151	192281	3210	91.3	1748	60
1152	192329	4319	80.1	1534	45
1153	192378	3432	190.8	3655	56
1154	192461	3682	88.1	1688	52
1155	192531	2880	71.4	1368	67
1156	192686	3847	72.2	1383	50
1158	192910	2491	119.8	2295	77
1159	192954	4574	83.1	1592	42
1165	193644	2796	349	6686	69
1166	193671	4132	382.3	7323	47
1167	193785	5906	112.3	2151	33
1168	193815	5168	122.8	2352	38
1169	193846	4116	190.8	3655	47
1170	193901	3873	81	1552	50
1178	194512	3423	108.7	2081	57
1184	194984	4317	223.4	4279	45
1185	195009	4869	234	4483	40
1186	195118	4382	90.3	1729	45
1187	195174	3470	122.3	2342	56
1188	195327	3374	55.2	1058	58
1192	195808	4827	163.8	3139	41
1201	196525	4395	150.8	2889	45
1202	196550	4442	153.1	2934	44
1205	196938	5925	55.5	1064	33
1206	196963	3825	60.7	1163	51
1211	197346	3558	218.9	4194	55
1212	197464	3939	54.7	1047	50
1217	197884	5242	143.6	2750	38
1218	197930	4057	107.7	2063	49
1230	198805	3325	87.8	1681	60
1231	198888	4319	61.3	1174	46
1233	199115	3147	77.8	1490	63
1234	199190	3181	87.4	1674	63
1240	199685	4079	85.7	1641	49

## Sheet: Antibody-Ubiquitin conjugate
#	m/z	Res.	S/N	I	FWHM				Assigned antibody assemblies
1	100021	3063	219.8	2733	33				Assembly	Mass	Intensity	% Intensity
2	100109	4290	30.8	384	23				HC2LC2-Ub4	187721	29714	94.839
24	102038	2632	1380.4	17163	39	deconvolution artefact			HC2LC2-Ub3-Strep1	181044	703	2.24378
25	102104	2777	434.1	5397	37	no m/z series detected, signal from noise			HC2LC2-Ub2-Strep2	174366	302	0.963902
26	102144	2033	406	5048	50	deconvolution artefact from 25537 Da			HC2LC2-Ub1-Strep3	167689	612	1.95334
29	102342	2755	32.3	401	37				HC2LC2-Strep4	161012	n.d.
30	102420	3016	26.7	333	34
31	102468	3892	29.8	370	26				HC2LC1-Ub3	153709	11393	100
64	104295	4409	114.4	1423	24				HC2LC1-Ub2-Strep1	147032	n.d.
67	104463	2840	387	4812	37	deconvolution artefact from 3263 Da			HC2LC1-Ub1-Strep2	140355	n.d.
69	104558	2682	25	311	39				HC2LC1-Strep3	133678	n.d.
70	104633	3601	88.7	1102	29
100	106572	5118	42	522	21				HC2-Ub2	119698	6595	100
105	106906	3986	100.4	1248	27				HC2-Ub1-Strep1	113021	n.d.
109	107195	3203	182.4	2267	33				HC2-Strep2	106344	n.d.
110	107269	2899	133.9	1664	37
113	107593	3931	27.1	337	27
115	107700	4512	25.7	319	24				Note: The deconvolution data from this experiment was noisy, with many deconvolution artefacts, presumably due to the abundance of small molecules (glycerol, imidazole) in the sample.
124	108428	3102	24.2	301	35
125	108538	3306	74	921	33
135	109336	3743	59.3	738	29
143	109813	4049	70.7	879	27
144	109927	3909	92.9	1155	28
154	110660	4362	53.3	663	25
170	111762	4663	144.9	1802	24
174	112105	4498	26.1	324	25
175	112160	3213	24.7	307	35
182	112679	3643	146.9	1827	31
206	114063	3125	40.4	502	36
208	114183	3264	155.2	1929	35
218	114839	3312	29.1	362	35
219	114912	4187	56.2	698	27
223	115119	3549	105.1	1307	32
226	115278	4362	62.4	776	26
228	115432	3215	28.8	358	36
229	115462	2775	27	335	42
257	117050	4729	29	361	25
261	117405	3574	24.4	304	33
263	117481	6465	33.7	419	18
265	117668	4139	80.9	1006	28
266	117677	4184	82.8	1029	28
267	117730	2522	183.2	2278	47
269	117918	4169	77.6	965	28
271	118065	4454	28.5	354	27
292	119050	4123	215.6	2681	29
301	119697	4905	530.4	6595	24
306	119958	4466	40.7	507	27
307	120015	5734	24.7	307	21
309	120174	5038	30.2	375	24
311	120300	3259	101.4	1261	37
312	120352	3124	141.7	1761	39
316	120728	5339	43.5	541	23
326	121315	5156	48.9	608	24
328	121478	4148	40.7	506	29
332	121759	3757	32.1	399	32
353	122966	4640	119.9	1491	27
354	123043	4235	71.9	894	29
360	123419	3049	52.8	657	40
369	123829	3029	26.8	333	41
370	123901	5278	174.2	2166	23
377	124306	2771	36.1	449	45
378	124364	4205	92.7	1153	30
379	124395	4825	46.4	577	26
387	125146	3784	68	845	33
393	125565	4344	143.1	1780	29
396	125988	3339	72.6	903	38
397	126030	4888	39.3	489	26
398	126111	4899	51.3	638	26
401	126346	3051	66.8	830	41
402	126420	2826	76.6	952	45
405	126702	3817	29.2	363	33
409	126978	6872	77.9	968	18
421	127687	3971	38.8	482	32
425	128039	3689	25.9	322	35
426	128090	5348	31.1	387	24
427	128196	3557	70.9	882	36
434	128749	4348	118.7	1476	30
435	128778	5078	156.1	1941	25
439	129065	4376	31.1	387	29
441	129188	3221	30.9	385	40
442	129232	3416	34.5	429	38
452	129834	5107	32.6	406	25
454	130015	3444	38.1	474	38
455	130049	3460	43.3	539	38
456	130127	5514	30	373	24
457	130151	3539	30.7	382	37
469	130797	5764	41.8	520	23
476	131180	5171	79.6	990	25
477	131205	3438	83.6	1039	38
479	131408	5159	24.1	300	25
480	131503	3562	34.2	425	37
487	131951	3299	44.1	548	40
494	132317	4724	24.6	305	28
500	132676	4770	24.2	301	28
501	132734	5172	67.2	836	26
502	132751	4952	66.2	823	27
511	133376	4252	29	361	31
512	133445	4825	64.6	804	28
514	133635	3806	24.7	307	35
515	133789	4077	30	373	33
516	133820	5059	45.9	570	26
517	133932	5678	548.9	6824	24	no m/z series detected, signal from noise
518	133988	5197	32.2	400	26
519	134047	3218	129.2	1606	42
529	134661	5081	116.3	1446	27
552	136048	4146	697.3	8671	33	deconvolution artefact
553	136150	5519	108.2	1345	25
554	136218	4992	90.8	1129	27
555	136282	3843	31	386	35
559	136456	5851	65.4	813	23
564	136696	5774	37.3	464	24
576	137392	4821	35.5	442	28
594	138319	5388	117.5	1461	26
596	138469	4695	112.8	1403	29
597	138491	4960	164.4	2044	28
599	138658	3866	106	1318	36
601	138863	4028	39.1	487	34
602	138977	3450	80.5	1001	40
603	139039	5932	24.8	309	23
604	139072	2778	33.3	414	50
611	139469	5312	31.7	394	26
623	140154	4137	39.2	487	34
633	140790	3742	42.7	530	38
634	140899	4415	176	2188	32
638	141286	4019	48.8	607	35
639	141375	4384	35.4	440	32
640	141437	3794	42.4	527	37
641	141515	3083	44.4	552	46
662	142578	4971	55.6	692	29
664	142740	5959	41.4	514	24
667	142922	3086	58.9	732	46
668	143001	3164	30.5	379	45
669	143140	4188	29.9	372	34
672	143339	5492	86.3	1073	26
681	143827	5793	72.8	905	25
682	143915	3244	80.6	1002	44
683	144040	4761	46.1	574	30
687	144338	5360	35.7	444	27
691	144557	2760	26	323	52
694	144734	3178	32.4	403	46
695	144779	4118	29	360	35
701	145110	2747	41.9	521	53
702	145167	4348	25.6	319	33
703	145200	4085	24.4	304	36
710	145526	3855	32.8	408	38
711	145680	2939	32.6	405	50
712	145729	4792	46.4	576	30
717	146060	3929	28.2	351	37
725	146519	4157	109.4	1360	35
728	146817	3899	67.5	840	38
736	147243	3244	28.2	351	45
737	147265	3940	43.9	545	37
738	147310	2168	52.5	652	68
739	147386	3112	87.6	1089	47
740	147491	2287	35.1	436	64
750	148066	4004	25.3	314	37
751	148098	4386	29.8	370	34
752	148188	4557	70.7	879	33
756	148564	3925	25.9	323	38
764	148971	4540	31.6	393	33
765	148994	4253	33	410	35
766	149054	3131	24.1	299	48
767	149116	3751	92.7	1152	40
768	149182	3587	48	596	42
769	149224	3745	24.5	305	40
770	149252	4605	28.4	353	32
772	149365	4641	50.8	632	32
777	149666	2067	60.1	747	72
778	149735	3662	27.1	337	41
786	150167	4189	60	746	36
793	150639	3036	154.5	1920	50
796	150893	4278	26.1	325	35
798	151092	3418	81.1	1009	44
800	151246	4106	29.9	371	37
801	151290	6209	51.8	644	24
802	151314	4052	74	921	37
803	151416	3385	52.4	651	45
804	151451	4556	28.7	357	33
806	151543	4311	31	385	35
807	151624	4962	54.4	676	31
808	151684	3267	32.7	407	46
809	151737	5372	108.2	1345	28
811	151915	4394	43	534	35
812	151941	3985	29.9	371	38
813	152051	4958	31.1	386	31
814	152073	5407	29	361	28
830	153040	5121	26.7	332	30
831	153070	2948	39.3	489	52
832	153109	4083	31.1	387	38
833	153143	3007	35.1	436	51
834	153225	3523	131.8	1639	43
836	153373	6681	25.5	318	23
841	153710	4876	916.3	11393	32
842	153810	4045	154.6	1923	38
843	153899	3094	82.4	1025	50
844	153938	3504	74.1	922	44
845	154033	4367	52.5	653	35
846	154182	6142	52.3	651	25
847	154201	3503	58.8	731	44
848	154232	4600	41.7	518	34
849	154364	4822	68.4	851	32
863	155501	4147	44.7	555	38
864	155570	4798	86.1	1071	32
865	155690	4910	28.2	351	32
870	155964	2863	44.1	549	54
871	156033	4461	58.8	731	35
872	156071	3505	49.4	614	45
873	156125	3013	45.5	566	52
880	156449	3032	51.4	639	52
881	156535	3954	25.7	319	40
889	157004	3205	45.7	569	49
891	157097	3689	24	299	43
894	157323	5269	32.6	406	30
896	157494	3600	56.7	704	44
900	157899	3062	55	684	52
901	157929	3309	71.2	886	48
902	158010	4095	30.1	375	39
903	158047	4416	51.5	640	36
904	158211	5625	64.9	807	28
913	158844	5078	29.1	362	31
921	159408	4238	44.5	553	38
922	159466	3886	56.9	708	41
923	159605	2827	376.5	4681	56	no m/z series detected, signal from noise
924	159670	3999	90.3	1123	40
925	159731	4293	70.6	877	37
926	159824	5224	36.2	450	31
929	160058	4447	26.2	325	36
931	160281	3551	73.2	910	45
932	160323	3800	82.1	1021	42
933	160342	4276	77.8	967	38
934	160369	5976	62	771	27
941	160741	4528	26.1	325	36
944	160986	4159	29.4	366	39
952	161549	4500	27.5	341	36
956	161757	5353	47.3	589	30
957	161800	4348	37.2	462	37
961	162084	5122	47.6	591	32
962	162163	3876	101	1256	42
963	162211	4447	115.4	1435	36
964	162242	5012	110.7	1376	32
966	162369	4890	43	534	33
968	162484	3585	27.3	340	45
970	162611	2570	26	323	63
971	162671	6227	38.4	477	26
972	162771	3811	87.7	1090	43
973	162883	4344	30.4	378	38
975	163028	4217	32.8	408	39
976	163141	4644	25.9	322	35
978	163229	4943	24.3	302	33
983	163684	2614	28	349	63
984	163719	4906	27.1	338	33
985	163848	3126	47	584	52
986	163890	4623	33.9	421	35
987	163937	3966	29.9	372	41
988	164029	5402	24.4	304	30
989	164051	4042	30.4	378	41
994	164331	5262	37.9	472	31
1003	164844	4018	134.7	1675	41
1008	165113	4402	79.3	986	38
1009	165190	3175	196.3	2441	52
1010	165296	4480	25.8	321	37
1018	165825	3121	105	1306	53
1019	165894	4979	150.2	1867	33
1020	165952	3803	62.9	782	44
1021	165990	4217	118.3	1471	39
1022	166063	4657	47.6	592	36
1023	166130	4322	24.4	303	38
1028	166350	3994	26.4	329	42
1033	166537	4948	34.9	434	34
1049	167425	4910	49.2	612	34
1051	167636	4843	71.1	883	35
1055	167875	5116	24.6	306	33
1056	167946	5246	666.4	8286	32	deconvolution artefact
1057	168041	2313	169.4	2106	73
1058	168063	4218	170.5	2120	40
1059	168105	6520	128.7	1601	26
1060	168135	4484	133.1	1655	38
1064	168443	3451	34.5	429	49
1065	168487	3535	43.9	546	48
1067	168597	4153	34.9	434	41
1069	168724	3340	27.5	342	51
1071	168855	5068	26.6	331	33
1083	169435	4756	31.2	388	36
1092	169979	3674	39.5	491	46
1093	170057	4287	518.8	6451	40	deconvolution artefact from 34012 Da
1094	170086	4491	457.2	5684	38	deconvolution artefact from 9907 Da
1095	170184	3847	51.9	646	44
1096	170264	2946	32.7	407	58
1097	170330	5194	47.7	593	33
1101	170562	5680	118.9	1479	30
1103	170661	4627	27.4	341	37
1110	170990	3397	67.7	842	50
1114	171274	5093	39.4	490	34
1115	171304	3460	45.9	570	50
1123	171784	4955	48.1	598	35
1128	172058	3813	28.4	353	45
1129	172161	3409	46.1	573	50
1131	172296	4917	30.1	375	35
1132	172351	5253	46.5	578	33
1133	172380	5253	51.1	635	33
1134	172396	4239	50.1	623	41
1135	172462	2236	36.1	449	77
1136	172509	4147	30.8	383	42
1138	172655	3199	58.1	722	54
1139	172778	4899	26.9	335	35
1143	173139	5140	38.3	477	34
1144	173163	4187	39.5	491	41
1145	173204	6941	29.3	364	25
1146	173304	4831	25.1	312	36
1150	173552	6266	48.4	601	28
1154	173769	5917	27.9	347	29
1158	173969	4544	26.9	334	38
1159	174092	4642	93.5	1163	38
1160	174181	3539	38.9	483	49
1161	174209	3528	37	460	49
1162	174279	3171	54.9	683	55
1163	174319	3580	49.3	613	49
1164	174360	3720	24.3	302	47
1165	174410	3043	24.7	307	57
1166	174476	4600	95.1	1183	38
1167	174590	3865	40.8	508	45
1170	174855	3794	31.9	397	46
1171	174914	5211	28.7	357	34
1172	174986	3016	25.2	313	58
1177	175289	4548	88.9	1105	39
1178	175355	3401	36.4	453	52
1179	175406	4082	61.3	762	43
1180	175439	6610	51.9	646	27
1189	175945	4605	25.4	316	38
1190	176091	4257	33.1	412	41
1191	176112	7514	30.7	382	23
1192	176130	5368	30	373	33
1193	176169	4140	44.2	550	43
1195	176279	4221	56.8	706	42
1196	176302	5655	50.1	623	31
1197	176349	3068	34.9	434	57
1198	176425	3590	52.5	653	49
1199	176443	4007	54.5	678	44
1200	176491	3493	39	484	51
1202	176561	5018	41.8	520	35
1203	176644	5155	88.9	1105	34
1204	176801	4437	28.8	358	40
1205	176882	5254	50.5	628	34
1206	176952	5393	54.4	676	33
1213	177331	4590	48.7	605	39
1214	177374	4649	61.2	761	38
1215	177394	5298	69.5	865	33
1223	177837	6940	344	4278	26	no m/z series detected, signal from noise
1224	177872	4216	96.8	1204	42
1225	177942	6398	187	2325	28
1230	178429	4396	75.9	944	41
1231	178459	5491	51.4	639	32
1232	178493	4008	42	523	45
1233	178582	3976	187.8	2335	45
1234	178634	2605	230.5	2866	69
1235	178732	3813	87.8	1091	47
1239	179131	5708	37.3	464	31
1241	179256	5320	69.6	866	34
1242	179318	5753	148.3	1844	31
1243	179384	3330	42	522	54
1244	179402	4153	44.1	549	43
1245	179440	4253	30.9	384	42
1246	179475	4438	26.8	334	40
1247	179536	3327	31.8	396	54
1250	179785	5486	64.4	801	33
1251	179817	5783	24.3	302	31
1256	180298	3011	54.1	672	60
1258	180448	4363	25.2	313	41
1259	180521	3973	89.8	1116	45
1260	180561	3938	79.9	994	46
1261	180646	3107	53	659	58
1262	180681	4283	41.6	517	42
1263	180734	5236	56.4	702	35
1264	180787	4191	34.4	427	43
1265	180861	4837	111.6	1387	37
1266	180940	5876	106.1	1319	31
1267	181035	4340	56.6	703	42
1268	181088	4645	100.3	1247	39
1269	181185	5232	48.7	606	35
1270	181246	4296	26.5	329	42
1271	181266	5402	24.8	309	34
1273	181400	2843	41.7	519	64
1274	181466	4739	50.4	626	38
1275	181490	3320	56.6	704	55
1276	181527	4659	30.3	376	39
1286	182184	4099	33.4	415	44
1288	182252	4360	35.7	444	42
1298	182803	4694	37.3	463	39
1300	182886	4033	28.4	353	45
1301	183025	4110	187.4	2330	45
1302	183113	3182	105.8	1316	58
1303	183163	3552	130	1616	52
1304	183193	4827	137.4	1708	38
1305	183265	3312	56.3	700	55
1306	183419	4758	100.3	1247	39
1307	183478	4434	73.3	911	41
1308	183521	3915	57.1	711	47
1309	183551	4607	63.3	787	40
1310	183620	3484	58.7	730	53
1311	183699	3975	122.9	1528	46
1312	183788	4687	30.4	378	39
1314	183932	4488	26.1	324	41
1315	183973	4250	44.7	556	43
1316	184014	5648	63.7	792	33
1326	184619	6155	103.9	1292	30
1327	184647	7618	49.8	619	24
1336	185117	5812	62.7	779	32
1337	185164	2816	92	1143	66
1338	185254	3764	36.1	449	49
1339	185316	2959	47.9	596	63
1340	185346	4073	64.7	804	46
1341	185397	4163	37.8	470	45
1342	185434	3956	48.5	603	47
1343	185475	3165	58.6	728	59
1344	185579	4653	110.3	1371	40
1345	185675	5042	137.9	1715	37
1346	185750	5136	140.3	1745	36
1347	185913	4666	109.4	1360	40
1348	185947	4470	88.7	1103	42
1349	186033	5012	54.8	681	37
1350	186066	3043	75.6	940	61
1351	186112	3334	47.7	593	56
1352	186197	2771	47.9	596	67
1353	186290	3661	49.3	613	51
1354	186383	2996	25.1	312	62
1355	186456	4829	39.8	495	39
1356	186489	4700	37.9	471	40
1364	187075	5441	98.1	1220	34
1370	187724	6151	2389.8	29714	31
1371	187824	3717	327.4	4071	51	Phosphat-addukt @ main peak
1372	187918	5067	114.5	1423	37
1373	187964	5179	60.9	757	36
1374	188058	4957	34.6	431	38
1376	188222	3650	31.8	396	52
1377	188258	4725	36	448	40
1378	188283	4668	38.6	480	40
1379	188370	3091	155.7	1936	61
1380	188432	4179	201.4	2504	45
1381	188510	6180	134.2	1669	31
1382	188608	5262	64	796	36
1383	188643	7317	33.9	421	26
1387	188901	5943	30.2	375	32
1388	188964	4743	42	522	40
1392	189218	6875	24	298	28
1395	189380	5077	55.1	685	37
1396	189488	5559	50.8	632	34
1405	190037	5314	37.5	466	36
1406	190062	4268	40.1	498	45
1407	190109	6905	44.5	553	28
1408	190182	5815	43.4	539	33
1409	190239	4365	30.8	383	44
1410	190357	3513	62	772	54
1411	190448	4510	64.6	803	42
1412	190477	6773	40.8	507	28
1413	190531	4641	74.9	931	41
1414	190609	3521	36.2	450	54
1415	190644	3503	46.7	580	54
1416	190698	5492	67.9	845	35
1417	190757	4595	31.5	392	42
1418	190845	6110	63.4	788	31
1419	190913	2466	54.3	675	77
1420	191014	4136	131.6	1636	46
1421	191104	5966	99.9	1243	32
1422	191127	4995	90.3	1123	38
1425	191356	4982	58.6	729	38
1426	191397	4464	48.1	598	43
1427	191419	5971	38.2	475	32
1428	191522	4172	76.6	953	46
1429	191536	6341	73.8	917	30
1436	191936	4108	54.4	676	47
1437	192055	5366	36.2	450	36
1448	192694	4327	107.7	1339	45
1449	192728	3981	150.6	1872	48
1450	192768	5063	80.7	1004	38
1451	192877	4908	82.8	1030	39
1457	193185	3765	34.8	432	51
1458	193297	4345	26	324	44
1459	193356	3866	38.6	480	50
1460	193460	3170	36.8	458	61
1461	193518	3039	54	672	64
1462	193609	4130	134.9	1677	47
1463	193643	5164	110.6	1375	38
1464	193696	4591	71.4	888	42
1465	193735	3610	65.9	820	54
1466	193770	4351	38	473	45
1467	193820	3891	35.2	438	50
1469	193942	5035	32	398	39
1474	194203	4809	38.8	482	40
1475	194245	4712	32.5	404	41
1476	194290	5046	25.7	320	39
1477	194346	4894	32.4	403	40
1478	194387	4143	43.9	546	47
1479	194468	4892	64.2	798	40
1485	194989	3376	125.7	1564	58
1486	195006	5101	126.3	1571	38
1487	195131	5975	60.9	757	33
1488	195179	5344	38.1	474	37
1491	195324	4906	29.3	364	40
1492	195404	3678	31.6	392	53
1493	195476	3286	50.6	629	59
1494	195513	5214	44.7	555	38
1495	195576	3464	52.5	652	56
1496	195678	5139	43.5	541	38
1497	195761	5173	71.8	893	38
1498	195804	4464	58.6	729	44
1500	195942	3941	29.6	368	50
1502	196069	4437	41.7	519	44
1504	196206	3113	51.8	644	63
1505	196328	3684	25.4	316	53
1507	196475	7611	30.7	382	26
1508	196535	5546	25.2	313	35
1509	196561	4591	29.3	365	43
1510	196669	3955	35.2	438	50
1511	196774	4367	159	1977	45
1512	196863	4941	36.4	453	40
1513	196894	4469	50	621	44
1515	197029	4560	29.6	367	43
1518	197220	6910	37.7	469	29
1519	197253	5833	66.6	828	34
1520	197287	3961	101.8	1266	50
1521	197323	3620	66.2	823	55
1522	197391	4679	24.9	309	42
1525	197579	4436	28.1	349	45
1526	197614	3489	38.8	482	57
1527	197673	3546	64.3	799	56
1528	197762	3614	69.4	863	55
1529	197872	3631	74	920	55
1530	197912	3607	69.3	861	55
1531	197953	4761	46.8	582	42
1533	198073	4226	49.8	619	47
1534	198188	4332	29.3	364	46
1542	198641	4807	25	310	41
1543	198746	4445	52.7	656	45
1544	198829	3976	86.1	1070	50
1545	198887	3782	51.7	643	53
1550	199178	3148	73.8	918	63
1551	199221	4722	66.4	826	42
1552	199303	4049	25.7	319	49
1555	199424	4038	28.9	360	49
1556	199505	5025	50.3	626	40
1557	199592	4235	43.7	543	47
1558	199662	5011	53.6	666	40
1559	199837	5406	465.9	5793	37	deconvolution artefact from 9907 Da
1560	199923	4265	29.3	364	47
