# Supplementary material for: Enzymatic protein fusions with 100% product yield
Source: eLife journal article supplement (doi:10.7554/elife.102765), 2024-12-19
Supplement: fig4-data3 [file Measurements and Calculations.xlsx]

## Sheet: Densitometric data
4A								4B
[min]	LC-Strep - BcPAP	LC-Ub	% LC-Ub	HC-Strep	HC-Ub	% HC-Ub		[min]	LC-Strep - BcPAP	LC-Peptide	% LC-Peptide	HC-Strep	HC-Peptide	% HC-Peptide
0	401	0	0	1910	0	0		0	951	0	0	1796.26	0	0
3.75	501	40.7	7.51338	1810	406	18.3213		3.75	1011	83.9	7.6628	1246.26	482	27.8893
7.5	375	59.7	13.7336	1200	618	33.9934		7.5	821	99.2	10.7803	946.26	872	47.9579
15	375	154.7	29.2052	1260	1460	53.6765		15	658	170	20.5314	510.26	1540	75.1124
30	361	401.7	52.6682	559	2230	79.957		30	518	382	42.4444	162.26	2320	93.4632
60	223	782.7	77.8264	58.7	2460	97.6694		60	192	598	75.6962	43.06	2290	98.1544
120	72	1257.7	94.5852	9.94	2770	99.6424		120	57	849	93.7086	29.96	2200	98.6565
