# Supplementary material for: Enzymatic protein fusions with 100% product yield
Source: eLife. 2025 Apr 1;13:RP102765. doi: 10.7554/eLife.102765 (PMC11961121; doi:10.7554/eLife.102765)
Supplement: Figure 2—source data 3. [file elife-102765-fig2-data3.xlsx]

## Sheet: Densitometric data
X in XGFDADPLVVEI	A			C			D			E			F			G			H			I			K			L
Time [min]	Ub-Strep band density [AU]	Ub-Peptide band density [AU]	% Conjugation (approximation)	Ub-Strep band density [AU]	Ub-Peptide band density [AU]	% Conjugation (approximation)	Ub-Strep band density [AU]	Ub-Peptide band density [AU]	% Conjugation (approximation)	Ub-Strep band density [AU]	Ub-Peptide band density [AU]	% Conjugation (approximation)	Ub-Strep band density [AU]	Ub-Peptide band density [AU]	% Conjugation (approximation)	Ub-Strep band density [AU]	Ub-Peptide band density [AU]	% Conjugation (approximation)	Ub-Strep band density [AU]	Ub-Peptide band density [AU]	% Conjugation (approximation)	Ub-Strep band density [AU]	Ub-Peptide band density [AU]	% Conjugation (approximation)	Ub-Strep band density [AU]	Ub-Peptide band density [AU]	% Conjugation (approximation)	Ub-Strep band density [AU]	Ub-Peptide band density [AU]	% Conjugation (approximation)
0	9711.91	0	0	5059.11	0	0	9076.91	0	0	7064.18	0	0	5362.53	0	0	12090.8		0	6315.31	0	0	5329.7	0	0	5476.82	0	0	11274.6	0	0
7.5	7646.26	2643.65	28.4668	4143.16	1110.46	23.5762	8850.96	0	0	7477.6	0	0	5138.7	48.657	1.0781	10753.6	272.435	2.83337	5792.35	0	0	5196.11	0	0	5335.53	0	0	10793.4	74.364	0.786773
15	7251.67	3869.48	38.0487	3913.34	1585.46	31.802	8614.79	0	0	7314.72	0	0	5139.99	64.778	1.42984	11635.3	445.335	4.21951	6027.94	0	0	4849.99	0	0	5352.11	0	0	10525.9	184.607	1.97873
30	6417.43	4956.48	47.0611	3697.16	2150.87	40.1057	9050.08	0	0	7491.77	0	0	5516.7	227.556	4.53252	11997.7	835.113	7.41741	5799.23	38.243	0.753308	4861.58	110.314	2.54526	4923.7	0	0	10609.6	249.556	2.63599
60	5118.72	5525.43	55.406	3237.75	2470.58	46.7597	8911.38	0	0	6870.06	61.364	1.01762	4773.75	320.849	7.18051	10619.6	1154.36	11.1202	5895.53	66.192	1.2758	4747.99	152.728	3.57022	4971.7	0	0	10602	602.87	6.14297
120	4413.31	6206.72	61.8135	3023.46	3049.28	53.7215	8930.38	0	0	7283.18	114.314	1.77451	4958.58	617.385	12.5346	10861	1923.6	16.9335	5960.94	104.435	1.97668	4829.41	248.263	5.58635	5222.11	0	0	10242.4	1130.23	11.2697
240	3622.18	5876.31	65.1237	2807.34	3395.58	58.1971	8938.79	0	0	7394.48	182.263	2.75878	4669.46	951.092	18.9916	9827.86	2689.72	23.9549	5658.53	200.849	3.92511	4473.99	372.556	8.74626	5241.23	0	0	9925.03	2132.3	19.8257
480	3388.48	5816.31	66.3943	2801.63	3570.99	59.4662	8888.38	52.95	0.681006	7181.77	313.092	4.77807	4770.87	1455.21	25.9851	9711.15	3925.96	31.7555	6045.53	322.678	5.78785	4582.99	627.799	13.6195	5103.65	0	0	8883.62	3008.01	28.0436
1440	3798.6	6391.13	65.9465	2831.92	2830.28	53.4956	9320.79	167.849	2.03063	6821.35	695.627	10.5046	3850.04	2125.51	38.8542	7770.86	5461.38	44.7185	5696.23	774.506	13.5322	4139.99	1066.92	22.8767	5186.23	0	0	7572.5	5347.96	44.839
2880	3490.3	6093.13	66.7701	2807.92	2292.87	48.4503	9083.08	265.385	3.25352	6784.48	995.042	14.443	3616.63	2601.63	45.2946	7121.03	6726.33	52.089	5997.77	1171.63	18.3567	4121.41	1484.63	29.3095	5163.23	0	0	6290.79	6179.67	53.0664
5760	3373.18	5627.43	65.7557	3393.46	2423.87	45.1193	8498.25	406.92	5.22343	7370.01	1740.58	21.3733	3093.04	2937.34	52.223	6714.33	7689.33	56.8619	5596.53	1748.04	26.444	4107.58	1842.04	34.0441	5411.35	0	0	4871.96	6797.38	61.6252
X in XGFDADPLVVEI	M			N			P			Q			R			S			T			V			W			Y
Time [min]	Ub-Strep band density [AU]	Ub-Peptide band density [AU]	% Conjugation (approximation)	Ub-Strep band density [AU]	Ub-Peptide band density [AU]	% Conjugation (approximation)	Ub-Strep band density [AU]	Ub-Peptide band density [AU]	% Conjugation (approximation)	Ub-Strep band density [AU]	Ub-Peptide band density [AU]	% Conjugation (approximation)	Ub-Strep band density [AU]	Ub-Peptide band density [AU]	% Conjugation (approximation)	Ub-Strep band density [AU]	Ub-Peptide band density [AU]	% Conjugation (approximation)	Ub-Strep band density [AU]	Ub-Peptide band density [AU]	% Conjugation (approximation)	Ub-Strep band density [AU]	Ub-Peptide band density [AU]	% Conjugation (approximation)	Ub-Strep band density [AU]	Ub-Peptide band density [AU]	% Conjugation (approximation)	Ub-Strep band density [AU]	Ub-Peptide band density [AU]	% Conjugation (approximation)
0	5750.94	0	0	6094.94	0	0	9168.2		0	13793.6	0	0	6103.82	0	0	5948.35	0	0	6998.77	0	0	4648.58		0	5282.7	0	0	4629.18	0	0
7.5	4836.41	61.485	1.44216	5923.23	0	0	6441.43	2444.36	30.3997	10651.2	0	0	5231.11	0	0	5237.82	811.213	15.1293	7126.89	285.678	4.41025	4028.34	174.728	4.75504	5463.7	0	0	5624.48	0	0
15	4451.99	129.021	3.22798	5780.65	0	0	5840.84	3324.77	39.5837	11136	0	0	4760.28	0	0	5607.23	1428.04	22.6686	6712.06	447.92	7.13314	4023.75	349.556	9.09017	4700.58	0	0	6096.18	0	0
30	4904.41	320.556	6.99667	6068.35	0	0	4655.6	3600.48	47.094	10473.6	0	0	5048.28	0	0	5076.82	1877.34	29.8552	6491.35	642.213	10.2231	4008.16	569.678	14.0591	5434.41	0	0	6290.77	0	0
60	4632.41	520.556	11.4528	6047.06	0	0	4455.89	4195.6	52.0099	12184.8	160.778	1.49602	5047.28	0	0	4431.7	2356.46	37.966	6186.35	1014.04	15.8722	3784.46	835.263	20.2575	5287.99	0	0	6534.6	58.364	1.01756
120	4261.99	830.678	18.323	5856.94	0	0	4461.18	4375.89	53.0295	13170.5	211.435	1.81425	5260.99	0	0	4366.28	3336.28	46.7938	6012.35	1432.16	21.5177	3529.63	1210.38	28.3001	5108.7	116.435	2.55625	6616.48	142.435	2.41788
240	4244.99	1372.09	27.1155	5752.35	69.778	1.37698	4357.48	4258.35	52.9371	12142.8	376.506	3.44587	5447.99	0	0	3457.58	3615.58	54.6197	5885.06	2045.87	28.5781	3128.63	1559.8	36.4611	4924.99	204.849	4.56872	6487.48	188.971	3.24394
480	3986.99	1946.51	35.9768	6023.48	87.778	1.64964	4419.01	4362.18	53.1879	12396.6	688.406	6.0077	5712.11	0	0	3009.46	4214.28	61.7122	5761.18	2737.99	35.3592	2904.04	1893.09	42.8675	5119.58	416.092	8.55447	6558.48	378.385	6.22707
1440	2879.75	2728.63	52.1668	6176.18	240.678	4.29276	4521.6	4408.18	52.8775	10919.8	1250.77	11.6481	5165.58	0	0	2434.87	5334.06	71.6029	4497.53	3505.82	47.2909	2066.34	2578.21	58.9513	5003.11	1020.21	19.0091	5982.48	959.749	15.587
2880	2375.46	3153.92	60.4461	5934.77	345.092	6.27294	4674.89	4578.18	52.9896	9965.64	2074.43	19.3281	5829.82	0	0	1831.75	4536.58	74.0301	4175.11	4136.23	53.2772	1633.51	2772.92	66.1459	4519.28	1302.63	24.9115	6068.06	1443.75	21.498
5760	1743.92	3403.34	69.195	5442.65	502.213	9.601	4143.6	3456.06	48.9801	8115.98	2114.3	23.068	5405.99	0	0	1996.04	4910.28	73.9004	3896.36	4790.94	58.5967	1373.21	2937.04	71.113	3825.87	1496.92	31.0508	5902.06	2060.46	28.6643
The lower molecular weight of Ub-Peptide results in the binding of less Coomassie and consequently in a lower signal. This is accounted for with Mw, Ub-Strep / Mw, Ub-Peptide = 1.151
X in XGFDADPLVVEI	A	C	D	E	F	G	H	I	K	L	M	N	P	Q	R	S	T	V	W	Y
Time for 10% conjugation [min, approximate]	2.7	3.1	>5760	1309	90	55	960	267	>5760	109	55	5760	2.5	1200	>5760	5	30	18	533	900
Time for 20% conjugation [min, approximate]	5.4	6.2	>5760	2742	253	200	3200	1252	>5760	240	133	>5760	5	3031	>5760	13	109	60	1516	1371
Time for 30% conjugation [min, approximate]	8	14	>5760	>5760	554	450	>5760	2979	>5760	514	267	>5760	7.5	>5760	>5760	30	248	128	5574	5959
Conjugation Rate [%, approximate]	92.9784	71.6206	0	0	2.03595	2.90404	0	0.529151	0	1.94535	3.70461	0	100	0	0	37.8205	5.31489	9.36053	0.311137	0.256112
Note: An exact conjugation rate determination is not possible, as peptides with different N-terminal residues compete in a reversible reaction.
