# Supplementary material for: Enzymatic protein fusions with 100% product yield
Source: eLife. 2025 Apr 1;13:RP102765. doi: 10.7554/eLife.102765 (PMC11961121; doi:10.7554/eLife.102765)
Supplement: Figure 3—source data 3. [file elife-102765-fig3-data3.xlsx]

## Sheet: Densitometric data
3A								3B								3C
[min]	MBP	LysS	LysS-MBP	% MBP	% LysS	% LysS-MBP		[min]	MBP	GST	GST-MBP	% MBP	% GST	% GST-MBP		[min]	Ub-Strep	Peptide	Ub-Peptide	% Ub-Strep	% Peptide	% Ub-Peptide
0	1450	2540	0	100	100	0		0	1300	1490	0	100	100	0		0	1608	n.d.	0	100	n.d	0
3.75	969	1690	1320	66.8276	66.5354	33.1742		3.75	768	907	959	59.0769	60.8725	36.4085		3.75	1178	n.d.	695	73.2587	n.d.	37.1062
7.5	768	1330	1740	52.9655	52.3622	45.3361		7.5	624	751	1360	48	50.4027	49.7258		7.5	842	n.d.	1038	52.3632	n.d.	55.2128
15	551	944	2380	38	37.1654	61.4194		15	381	466	1640	29.3077	31.2752	65.9429		15	360	n.d.	1398	22.3881	n.d.	79.5222
30	284	532	2920	19.5862	20.9449	78.1585		30	192	247	2000	14.7692	16.5772	82.0008		30	62.3	n.d.	1588	3.87438	n.d.	96.2249
60	129	221	2940	8.89655	8.70079	89.3617		60	77.4	111	2050	5.95385	7.44966	91.5833		60	7.44	n.d.	1768	0.462687	n.d.	99.5809
120	73.7	136	3400	5.08276	5.35433	94.1907		120	36.5	77	2190	2.80769	5.16779	95.0727		120	0	n.d.	1648	0	n.d.	100
240	52.8	71.2	3580	3.64138	2.80315	96.6523		240	24.6	70	2240	1.89231	4.69799	95.9479		240	0	n.d.	1718	0	n.d.	100
480	39.5	45.8	3700	2.72414	1.80315	97.7465		480	17.4	50	2240	1.33846	3.3557	97.079		480	0	n.d.	1788	0	n.d.	100
960	30.4	22.7	3650	2.09655	0.893701	98.5661		960	15.6	62	2380	1.2	4.16107	96.8424		960	0	n.d.	1838	0	n.d.	100
1440	33.1	23.7	3700	2.28276	0.933071	98.4881		1440	13.7	51	2160	1.05385	3.42282	97.0917		1440
1920	34.7	30.2	3800	2.3931	1.18898	98.3208		1920	16.1	55	2160	1.23846	3.69128	96.8132		1920
2400	30.7	26.3	3780	2.11724	1.03543	98.5145		2400	21.2	59	2250	1.63077	3.95973	96.5582		2400
3D								3E								3F
[min]	MBP	LysS	LysS-MBP	% MBP	% LysS	% LysS-MBP		[min]	MBP	LysS	LysS-MBP	% MBP	% LysS	% LysS-MBP		[min]	MBP	LysS	LysS-MBP	% MBP	% LysS	% LysS-MBP
0	1530	2830	0	100	100	0		0	1060	1860	0	100	99.4652	0		0	606	2380	0	62.4742	100	0
3.75	1260	2230	1120	82.3529	78.7986	24.295		3.75	1060	1870	258	100	100	8.09285		3.75	885	1690	158	91.2371	71.0084	5.78119
7.5	992	1760	1440	64.8366	62.1908	34.3511		7.5	935	1670	365	88.2075	89.3048	12.2896		7.5	970	1750	310	100	73.5294	10.231
15	796	1460	1970	52.0261	51.5901	46.6162		15	857	1540	571	80.8491	82.3529	19.2385		15	775	1490	516	79.8969	62.605	18.5545
30	615	1150	2500	40.1961	40.636	58.6166		30	744	1340	859	70.1887	71.6578	29.1879		30	575	1200	914	59.2784	50.4202	33.9903
60	468	958	3650	30.5882	33.8516	71.907		60	609	1090	1340	57.4528	58.2888	44.0935		60	321	774	1380	33.0928	32.521	55.7576
120	286	635	4390	18.6928	22.4382	82.6586		120	378	666	1810	35.6604	35.615	63.4198		120	144	477	1970	14.8454	20.042	76.0324
240	124	261	3610	8.10458	9.22261	90.363		240	214	362	2310	20.1887	19.3583	80.0416		240	69.6	280	2230	7.17526	11.7647	86.4475
480	70.3	169	3910	4.59477	5.97173	94.2328		480	128	167	2530	12.0755	8.93048	89.5575		480	31.6	175	2290	3.25773	7.35294	91.7247
960	49.7	110	4010	3.24837	3.88693	96.17		960	90.8	58.7	2540	8.56604	3.13904	94.4413		960	19.8	141	2260	2.04124	5.92437	93.3576
1440	41.3	93.2	4190	2.69935	3.29329	96.8898		1440	76.7	37.3	2550	7.23585	1.99465	95.7207		1440	16.7	154	2470	1.72165	6.47059	93.5358
1920	33	81.7	4090	2.15686	2.88693	97.2721		1920	67.8	40	2650	6.39623	2.13904	96.0911		1920	12.5	140	2230	1.28866	5.88235	93.5992
2400	42.8	84.4	4180	2.79739	2.98233	97.0468		2400	59.4	31.6	2540	5.60377	1.68984	96.5412		2400	11.4	131	2260	1.17526	5.5042	94.0726
Appendix 1 - Figure 2A								Appendix 1 - Figure 2B
[min]	Ub	LysS	LysS-Ub	% Ub	% LysS	% LysS-Ub		[min]	Pro-Ub	LysS	LysS-Ub	% Ub	% LysS	% LysS-Ub
0	464	2040	0	100	100	0		0	519	2130	0	100	100	0
3.75	328	1550	787	70.6897	75.9804	29.531		3.75	451	1860	182	86.8979	87.3239	7.30044
7.5	260	1360	962	56.0345	66.6667	37.2579		7.5	460	1980	287	88.632	92.9577	10.5244
15	207	1040	1290	44.6121	50.9804	50.8475		15	413	1680	461	79.5761	78.8732	18.0501
30	127	603	1490	27.3707	29.5588	67.1171		30	361	1490	923	69.5568	69.9531	33.2733
60	74.5	347	1870	16.056	17.0098	81.6059		60	274	1010	1580	52.7938	47.4178	55.1676
120	53.7	210	2070	11.5733	10.2941	88.7003		120	167	593	1980	32.1773	27.8404	72.2628
240	37.3	103	2060	8.03879	5.04902	93.6236		240	103	248	2150	19.8459	11.6432	85.9656
480	36	58	2220	7.75862	2.84314	95.9378		480	82.8	138	2390	15.9538	6.47887	91.5428
960	32.5	38.8	2210	7.00431	1.90196	96.8746		960	71.8	87.9	2120	13.8343	4.12676	92.9947
1440	30.3	31.2	2110	6.53017	1.52941	97.1679		1440	70.8	119	2190	13.6416	5.58685	92.0245
1920	38.9	36.3	2140	8.38362	1.77941	96.6053		1920	70.4	94.8	1960	13.5645	4.4507	92.2266
2400	41.4	30.6	2190	8.92241	1.5	96.817		2400	72.3	134	2000	13.9306	6.29108	90.6495
