# Supplementary material for: Enzymatic protein fusions with 100% product yield
Source: eLife. 2025 Apr 1;13:RP102765. doi: 10.7554/eLife.102765 (PMC11961121; doi:10.7554/eLife.102765)
Supplement: Figure 5—source data 3. [file elife-102765-fig5-data3.xlsx]

## Sheet: 10 μm Peptide Peak Assignment
#	m/z	Res.	S/N	I	FWHM	% Intensity			Sequence	Mass	Detected Intensity (+/- 3 Da)	Relative Intensity [%]		Top Peaks (#)	Mass	Intensity	Relative Intensity [%]	Assignment
884	2000.2	10957	0.8	36	0.2	0.000356601			PGAFDADPLVVEISEWSHPQFEK	2598.86	48795	0.179229		1	2501.2	10095304	100	GAFDADPLVVEISEWSHPQFEK
885	2000.5	11600	1.2	52	0.2	0.000515091			GAFDADPLVVEISEWSHPQFEK	2501.74	27128117	99.6441		2	2502.2	6607687	65.4531	GAFDADPLVVEISEWSHPQFEK
886	2000.9	14598	1.4	61	0.1	0.000604241			AFDADPLVVEISEWSHPQFEK	2444.68	15299	0.0561947		3	2500.2	5096767	50.4865	GAFDADPLVVEISEWSHPQFEK
887	2001.3	11384	1.5	65	0.2	0.000643864			FDADPLVVEISEWSHPQFEK	2373.6	20165	0.0740679		4	2503.2	3556269	35.227	GAFDADPLVVEISEWSHPQFEK
888	2001.6	9558	4.3	184	0.2	0.00182263			DADPLVVEISEWSHPQFEK	2226.43	2691	0.0098843		5	2504.2	1689637	16.7369	GAFDADPLVVEISEWSHPQFEK
889	2002	12900	2.6	110	0.2	0.00108962			ADPLVVEISEWSHPQFEK	2111.34	5409	0.0198678		6	2505.2	659450	6.53225	GAFDADPLVVEISEWSHPQFEK
890	2002.9	16007	1.5	65	0.1	0.000643864			DPLVVEISEWSHPQFEK	2040.26	4527	0.0166281		7	2523.2	340445	3.37231	GAFDADPLVVEISEWSHPQFEK+22
891	2003.3	9961	0.6	25	0.2	0.00024764								8	2524.2	265510	2.63003	GAFDADPLVVEISEWSHPQFEK+22
892	2003.6	10659	1.6	67	0.2	0.000663675								9	2522.2	246686	2.44357	GAFDADPLVVEISEWSHPQFEK+22
893	2003.9	10462	1.4	60	0.2	0.000594336								10	2506.2	225317	2.2319	GAFDADPLVVEISEWSHPQFEK
894	2004.3	11561	6.1	260	0.2	0.00257545								11	2525.2	140077	1.38755	GAFDADPLVVEISEWSHPQFEK+22
895	2004.5	9825	4	168	0.2	0.00166414
896	2004.9	14211	7.6	324	0.1	0.00320941
897	2005.2	18186	12.6	536	0.1	0.0053094
898	2006.2	4458	40.2	1706	0.4	0.0168989			Note: Shown is a list of detected masses, after charge deconvolution.
899	2007.3	8961	1.7	71	0.2	0.000703297			Note 2: Many detected masses constitue background noise or deconvolution artifacts.
900	2007.5	10049	4.1	175	0.2	0.00173348
901	2008	10863	6.1	260	0.2	0.00257545
902	2008.2	12774	13.9	590	0.2	0.0058443
903	2009	14045	5.3	224	0.1	0.00221885
904	2009.2	17015	1	44	0.1	0.000435846
905	2009.9	10571	2.5	107	0.2	0.0010599
906	2010.5	15958	4.8	204	0.1	0.00202074
907	2011.2	15326	1.3	57	0.1	0.000564619
908	2011.5	10843	0.7	30	0.2	0.000297168
909	2012.2	10855	1.1	47	0.2	0.000465563
910	2012.6	13226	0.3	11	0.2	0.000108962
911	2013	16891	1.2	50	0.1	0.00049528
912	2013.6	8471	0.6	24	0.2	0.000237734
913	2014.2	10791	2.1	87	0.2	0.000861787
914	2015	9289	2.3	99	0.2	0.000980654
915	2015.7	8127	2	85	0.2	0.000841976
916	2016	6881	3.1	132	0.3	0.00130754
917	2016.3	6371	3.3	140	0.3	0.00138678
918	2016.6	8392	5.2	220	0.2	0.00217923
919	2017.1	5718	11.6	491	0.4	0.00486365
920	2017.7	6127	2.6	110	0.3	0.00108962
921	2018.5	6498	1	42	0.3	0.000416035
922	2018.8	7939	1.7	70	0.3	0.000693392
923	2019.2	7108	1.2	52	0.3	0.000515091
924	2019.4	7013	0.8	34	0.3	0.00033679
925	2019.8	14306	16.2	686	0.1	0.00679524
926	2020.7	12550	0.8	36	0.2	0.000356601
927	2021	10070	2.2	94	0.2	0.000931126
928	2021.3	8796	1.2	50	0.2	0.00049528
929	2021.7	10949	4.3	184	0.2	0.00182263
930	2022.1	8974	4.5	193	0.2	0.00191178
931	2022.5	9632	3.5	147	0.2	0.00145612
932	2022.9	14597	10.4	441	0.1	0.00436837
933	2023.3	16595	1.6	70	0.1	0.000693392
934	2023.7	14760	0.6	27	0.1	0.000267451
935	2024.1	17030	2.7	116	0.1	0.00114905
936	2024.5	17277	2.2	92	0.1	0.000911315
937	2024.9	18583	0.8	33	0.1	0.000326885
938	2025.3	14723	0.5	20	0.1	0.000198112
939	2025.9	12748	0.4	18	0.2	0.000178301
940	2026.2	12786	1.3	57	0.2	0.000564619
941	2026.9	16380	1.7	71	0.1	0.000703297
942	2027.3	16586	1.5	66	0.1	0.000653769
943	2027.6	12701	0.6	24	0.2	0.000237734
944	2027.9	12278	1.9	80	0.2	0.000792448
945	2028.2	10645	1.5	64	0.2	0.000633958
946	2028.5	11934	0.5	22	0.2	0.000217923
947	2028.9	9161	5.6	237	0.2	0.00234763
948	2029.5	11971	1.5	66	0.2	0.000653769
949	2030.3	9136	0.9	40	0.2	0.000396224
950	2031	13243	1.1	48	0.2	0.000475469
951	2032	11891	0.3	13	0.2	0.000128773
952	2032.2	15444	0.7	30	0.1	0.000297168
953	2032.9	16641	0.5	23	0.1	0.000227829
954	2033.6	11703	0.3	13	0.2	0.000128773
955	2033.7	9767	0.3	12	0.2	0.000118867
956	2034	13437	0.8	35	0.2	0.000346696
957	2034.2	12353	0.8	33	0.2	0.000326885
958	2034.8	9211	0.4	16	0.2	0.00015849
959	2035.2	17213	2.2	94	0.1	0.000931126
960	2035.5	17195	0.6	25	0.1	0.00024764
961	2036.9	9686	0.4	15	0.2	0.000148584
962	2037.6	12792	0.6	27	0.2	0.000267451
963	2038.2	6495	0.4	16	0.3	0.00015849
964	2038.5	10249	0.3	14	0.2	0.000138678
965	2039	19443	34.8	1478	0.1	0.0146405
966	2039.7	15653	1.2	50	0.1	0.00049528
967	2040	19510	33.8	1436	0.1	0.0142244
968	2040.4	8531	2.6	111	0.2	0.00109952
969	2041	19118	28.6	1215	0.1	0.0120353
970	2041.3	8485	0.8	36	0.2	0.000356601
971	2042	16301	2.6	112	0.1	0.00110943
972	2043	14065	0.7	32	0.1	0.000316979
973	2044.2	15075	1.6	67	0.1	0.000663675
974	2044.9	14069	1.2	51	0.1	0.000505185
975	2045.3	16393	0.4	17	0.1	0.000168395
976	2046.1	11679	0.6	25	0.2	0.00024764
977	2047	11768	0.8	35	0.2	0.000346696
978	2047.2	14603	0.3	13	0.1	0.000128773
979	2047.5	9231	0.3	11	0.2	0.000108962
980	2048	15415	1.4	61	0.1	0.000604241
981	2048.3	13524	2.1	91	0.2	0.000901409
982	2048.7	10983	0.9	36	0.2	0.000356601
983	2049	16877	6.3	266	0.1	0.00263489
984	2049.5	6348	3.6	152	0.3	0.00150565
985	2050	6827	4	169	0.3	0.00167405
986	2050.5	13226	1.5	65	0.2	0.000643864
987	2051	10174	5.4	230	0.2	0.00227829
988	2051.6	6293	6.5	276	0.3	0.00273394
989	2052	5683	1.8	78	0.4	0.000772636
990	2052.5	17527	1	41	0.1	0.000406129
991	2052.9	12978	1.8	76	0.2	0.000752825
992	2055	16005	0.6	25	0.1	0.00024764
993	2056.2	16602	0.4	18	0.1	0.000178301
994	2058.2	12653	0.2	10	0.2	9.9056e-05
995	2059.5	12520	0.9	38	0.2	0.000376413
996	2060	14846	1.2	52	0.1	0.000515091
997	2060.3	8806	0.8	33	0.2	0.000326885
998	2060.9	6782	7.6	322	0.3	0.0031896
999	2061.5	8378	1.5	64	0.2	0.000633958
1000	2062.2	12692	0.5	20	0.2	0.000198112
1001	2063	15845	1.9	79	0.1	0.000782542
1002	2063.7	9172	0.9	37	0.2	0.000366507
1003	2064.1	11144	0.7	28	0.2	0.000277357
1004	2064.5	11988	0.8	33	0.2	0.000326885
1005	2064.9	11515	3.6	154	0.2	0.00152546
1006	2065.2	8326	2	86	0.2	0.000851881
1007	2065.5	11637	0.8	33	0.2	0.000326885
1008	2066	12288	2.2	96	0.2	0.000950937
1009	2066.8	7252	4.8	203	0.3	0.00201084
1010	2067.5	9999	3.1	132	0.2	0.00130754
1011	2068.2	7740	8.2	349	0.3	0.00345705
1012	2068.6	7988	4.3	184	0.3	0.00182263
1013	2068.9	7692	12	508	0.3	0.00503204
1014	2069.5	7320	6.4	270	0.3	0.00267451
1015	2070.5	11023	1	41	0.2	0.000406129
1016	2070.7	9110	0.8	34	0.2	0.00033679
1017	2073	13419	0.8	33	0.2	0.000326885
1018	2074.9	6945	0.3	14	0.3	0.000138678
1019	2075.9	12508	0.4	15	0.2	0.000148584
1020	2076.2	14344	0.8	33	0.1	0.000326885
1021	2076.6	13931	0.5	23	0.1	0.000227829
1022	2076.9	9155	1.2	52	0.2	0.000515091
1023	2077.4	7957	0.3	11	0.3	0.000108962
1024	2078.2	9751	0.8	33	0.2	0.000326885
1025	2078.9	15577	2.4	102	0.1	0.00101037
1026	2079.6	15795	4.1	172	0.1	0.00170376
1027	2080	18717	4.1	173	0.1	0.00171367
1028	2081.1	12799	0.4	15	0.2	0.000148584
1029	2081.5	18835	26.7	1132	0.1	0.0112131
1030	2081.8	12000	0.4	15	0.2	0.000148584
1031	2082	10615	0.6	23	0.2	0.000227829
1032	2082.5	14892	0.9	40	0.1	0.000396224
1033	2083	16244	12.4	527	0.1	0.00522025
1034	2083.3	8815	0.3	14	0.2	0.000138678
1035	2084.2	14567	2.9	123	0.1	0.00121839
1036	2084.5	13478	4	171	0.2	0.00169386
1037	2084.9	7549	2.2	95	0.3	0.000941032
1038	2085.7	9707	3.9	166	0.2	0.00164433
1039	2086.2	9071	5.9	250	0.2	0.0024764
1040	2086.5	15995	4.2	178	0.1	0.0017632
1041	2087	11063	1	43	0.2	0.000425941
1042	2087.2	12371	1	44	0.2	0.000435846
1043	2088	17605	5.2	220	0.1	0.00217923
1044	2088.7	17480	5.5	235	0.1	0.00232781
1045	2089.5	17563	8	341	0.1	0.00337781
1046	2090.2	16047	5.3	226	0.1	0.00223866
1047	2090.8	15454	3.2	136	0.1	0.00134716
1048	2091.7	14257	0.7	30	0.1	0.000297168
1049	2092.2	14639	1.3	56	0.1	0.000554713
1050	2093	9434	1.1	46	0.2	0.000455657
1051	2093.9	12289	1.5	63	0.2	0.000624053
1052	2094.2	13406	0.7	28	0.2	0.000277357
1053	2094.5	15561	1.7	73	0.1	0.000723108
1054	2094.9	11045	0.3	14	0.2	0.000138678
1055	2095.2	17634	0.7	28	0.1	0.000277357
1056	2096	13449	1.3	57	0.2	0.000564619
1057	2097	13552	1.1	48	0.2	0.000475469
1058	2097.5	14398	1.1	46	0.1	0.000455657
1059	2097.7	10786	0.7	31	0.2	0.000307073
1060	2098.2	13804	4	170	0.2	0.00168395
1061	2098.4	14901	3.2	136	0.1	0.00134716
1062	2099	13860	0.4	16	0.2	0.00015849
1063	2099.2	16546	0.5	22	0.1	0.000217923
1064	2100	15580	0.4	16	0.1	0.00015849
1065	2100.7	16997	1.8	78	0.1	0.000772636
1066	2101.2	13789	0.4	15	0.2	0.000148584
1067	2101.5	16108	0.4	15	0.1	0.000148584
1068	2104.2	13131	1.5	65	0.2	0.000643864
1069	2105.3	16379	0.5	23	0.1	0.000227829
1070	2105.5	14399	0.5	23	0.1	0.000227829
1071	2105.8	13431	1.3	54	0.2	0.000534902
1072	2106.2	8658	1.9	82	0.2	0.000812259
1073	2106.5	7370	6.1	259	0.3	0.00256555
1074	2106.9	9054	7.6	322	0.2	0.0031896
1075	2107.2	7265	5	211	0.3	0.00209008
1076	2108.2	13252	0.6	27	0.2	0.000267451
1077	2109.6	10948	0.8	35	0.2	0.000346696
1078	2110	18629	11.8	501	0.1	0.0049627
1079	2111	20059	61.4	2610	0.1	0.0258536
1080	2112	17996	34.4	1463	0.1	0.0144919
1081	2112.7	7275	0.3	12	0.3	0.000118867
1082	2113.1	16750	10	423	0.1	0.00419007
1083	2113.5	14913	1.2	50	0.1	0.00049528
1084	2114.1	14247	6.8	288	0.1	0.00285281
1085	2114.8	10318	1	42	0.2	0.000416035
1086	2115.1	13528	0.8	35	0.2	0.000346696
1087	2116.3	7737	0.6	25	0.3	0.00024764
1088	2118.1	5162	6	254	0.4	0.00251602
1089	2118.6	6412	4.5	193	0.3	0.00191178
1090	2119.5	5343	9.2	392	0.4	0.00388299
1091	2120.1	6462	10.5	446	0.3	0.0044179
1092	2120.9	10213	1.6	66	0.2	0.000653769
1093	2121.5	11446	0.3	12	0.2	0.000118867
1094	2122.2	9888	0.2	11	0.2	0.000108962
1095	2122.5	13145	0.4	17	0.2	0.000168395
1096	2123.2	12659	0.4	18	0.2	0.000178301
1097	2124.1	11026	0.6	25	0.2	0.00024764
1098	2124.6	9462	0.3	13	0.2	0.000128773
1099	2125.4	12156	0.4	16	0.2	0.00015849
1100	2126.1	9077	0.5	20	0.2	0.000198112
1101	2126.8	14088	1.6	68	0.2	0.000673581
1102	2128.1	9458	5.3	226	0.2	0.00223866
1103	2128.4	9560	1.6	68	0.2	0.000673581
1104	2128.8	9083	3.6	155	0.2	0.00153537
1105	2129.9	7226	4.9	208	0.3	0.00206036
1106	2130.7	9808	5.7	244	0.2	0.00241697
1107	2131.5	9439	6.2	262	0.2	0.00259527
1108	2132.1	9185	4.6	197	0.2	0.0019514
1109	2132.8	11872	2.9	122	0.2	0.00120848
1110	2133	14716	4.7	201	0.1	0.00199102
1111	2133.5	9864	4.1	175	0.2	0.00173348
1112	2134.2	11063	4	168	0.2	0.00166414
1113	2134.4	11395	3.2	135	0.2	0.00133726
1114	2135.6	8542	34.2	1453	0.3	0.0143928
1115	2135.8	7119	37.7	1601	0.3	0.0158589
1116	2136.5	7843	11.3	481	0.3	0.00476459
1117	2137	14618	7.7	325	0.1	0.00321932
1118	2137.5	7624	6.5	278	0.3	0.00275376
1119	2137.8	6108	4	169	0.3	0.00167405
1120	2138.2	10147	7.5	318	0.2	0.00314998
1121	2138.5	13604	4.3	182	0.2	0.00180282
1122	2138.8	14708	5.4	228	0.1	0.00225848
1123	2139.1	14468	2.5	107	0.1	0.0010599
1124	2139.5	7052	2.2	92	0.3	0.000911315
1125	2140.2	11435	5.8	246	0.2	0.00243678
1126	2140.6	9149	2.5	107	0.2	0.0010599
1127	2140.9	11252	4.5	191	0.2	0.00189197
1128	2141.5	6939	6.6	278	0.3	0.00275376
1129	2142.2	9962	5.4	230	0.2	0.00227829
1130	2142.5	13777	4	170	0.2	0.00168395
1131	2143	9160	1.4	58	0.2	0.000574525
1132	2143.3	11912	2.4	101	0.2	0.00100047
1133	2144.1	13451	4.4	186	0.2	0.00184244
1134	2145	5376	3	129	0.4	0.00127782
1135	2145.5	10995	4.4	189	0.2	0.00187216
1136	2145.7	9791	2.7	115	0.2	0.00113914
1137	2146.1	12251	4.8	204	0.2	0.00202074
1138	2146.5	12516	5.7	244	0.2	0.00241697
1139	2146.9	13028	4.2	179	0.2	0.0017731
1140	2147.5	7015	3.2	136	0.3	0.00134716
1141	2148	8687	4.2	177	0.2	0.00175329
1142	2148.4	11586	4.3	181	0.2	0.00179291
1143	2148.7	13542	4.1	173	0.2	0.00171367
1144	2149.1	10985	5.1	218	0.2	0.00215942
1145	2149.4	16059	2.2	95	0.1	0.000941032
1146	2150.2	11565	2.5	106	0.2	0.00104999
1147	2150.9	8272	5.4	229	0.3	0.00226838
1148	2151.7	13799	4.2	177	0.2	0.00175329
1149	2152.1	11018	0.7	31	0.2	0.000307073
1150	2152.4	15048	3.3	140	0.1	0.00138678
1151	2153.3	9856	2.4	100	0.2	0.00099056
1152	2153.5	10081	3	126	0.2	0.00124811
1153	2154.1	10135	9.3	396	0.2	0.00392262
1154	2154.4	8150	6.5	278	0.3	0.00275376
1155	2155	7300	7.1	303	0.3	0.0030014
1156	2155.8	13361	3.4	142	0.2	0.00140659
1157	2156.1	13707	3.5	148	0.2	0.00146603
1158	2156.4	9781	1.6	67	0.2	0.000663675
1159	2156.8	13653	4.3	182	0.2	0.00180282
1160	2157.7	9576	3.2	135	0.2	0.00133726
1161	2158.5	16872	3.4	144	0.1	0.00142641
1162	2159.3	11368	4	168	0.2	0.00166414
1163	2160.2	12081	5	212	0.2	0.00209999
1164	2160.9	7646	3	128	0.3	0.00126792
1165	2161.2	12014	2.5	106	0.2	0.00104999
1166	2161.9	14201	1.9	82	0.2	0.000812259
1167	2162.3	14278	0.7	29	0.2	0.000287262
1168	2162.7	10818	2.6	111	0.2	0.00109952
1169	2163.6	12941	0.4	18	0.2	0.000178301
1170	2164	17520	5.2	222	0.1	0.00219904
1171	2164.4	13041	3.7	158	0.2	0.00156508
1172	2165.5	17558	3	128	0.1	0.00126792
1173	2167.5	9520	0.2	10	0.2	9.9056e-05
1174	2167.8	13224	0.8	33	0.2	0.000326885
1175	2169.6	13682	0.4	16	0.2	0.00015849
1176	2170.3	10184	0.3	11	0.2	0.000108962
1177	2172	13389	0.4	15	0.2	0.000148584
1178	2172.8	11330	0.6	24	0.2	0.000237734
1179	2173.5	12359	1.2	49	0.2	0.000485374
1180	2174.3	9090	0.6	24	0.2	0.000237734
1181	2174.8	9100	0.7	28	0.2	0.000277357
1182	2175.5	12288	1.4	61	0.2	0.000604241
1183	2176	13810	0.6	28	0.2	0.000277357
1184	2176.4	10308	0.6	25	0.2	0.00024764
1185	2177	14414	1.3	55	0.2	0.000544808
1186	2177.3	9432	0.5	22	0.2	0.000217923
1187	2178.1	10065	0.6	26	0.2	0.000257545
1188	2178.7	8977	0.4	17	0.2	0.000168395
1189	2179	7980	0.3	14	0.3	0.000138678
1190	2179.3	10661	0.5	22	0.2	0.000217923
1191	2180.9	12983	1.2	51	0.2	0.000505185
1192	2181.1	9762	0.7	31	0.2	0.000307073
1193	2181.5	16066	1.2	49	0.1	0.000485374
1194	2182.1	14762	1.2	51	0.1	0.000505185
1195	2182.4	14403	1.6	68	0.2	0.000673581
1196	2182.6	13701	1.2	53	0.2	0.000524997
1197	2183	15926	4.2	178	0.1	0.0017632
1198	2183.7	12935	0.6	25	0.2	0.00024764
1199	2184	9650	0.3	13	0.2	0.000128773
1200	2184.8	14609	0.7	29	0.1	0.000287262
1201	2185.4	10025	1.1	46	0.2	0.000455657
1202	2186.1	11657	1	41	0.2	0.000406129
1203	2187	13395	1.2	51	0.2	0.000505185
1204	2187.6	12467	2.9	124	0.2	0.00122829
1205	2187.9	11528	2	86	0.2	0.000851881
1206	2188.3	9814	2.2	93	0.2	0.00092122
1207	2189.1	10791	1.3	55	0.2	0.000544808
1208	2189.8	14599	4.3	182	0.1	0.00180282
1209	2190.1	11019	4.3	182	0.2	0.00180282
1210	2190.7	5155	6.8	290	0.4	0.00287262
1211	2191.1	8167	12.5	531	0.3	0.00525987
1212	2191.4	5654	6.6	280	0.4	0.00277357
1213	2192.3	8341	4.1	175	0.3	0.00173348
1214	2192.8	5493	9.7	412	0.4	0.00408111
1215	2193.1	7572	9.5	405	0.3	0.00401177
1216	2194.2	12544	0.6	25	0.2	0.00024764
1217	2194.6	16955	0.7	29	0.1	0.000287262
1218	2195	17002	2.4	103	0.1	0.00102028
1219	2195.4	16841	1.9	82	0.1	0.000812259
1220	2195.8	18021	2.7	115	0.1	0.00113914
1221	2196.2	16109	2.1	89	0.1	0.000881598
1222	2196.6	16940	1.3	56	0.1	0.000554713
1223	2197.5	8483	0.4	18	0.3	0.000178301
1224	2198.4	11828	1	44	0.2	0.000435846
1225	2198.9	7282	2.4	101	0.3	0.00100047
1226	2199.7	6908	2	85	0.3	0.000841976
1227	2200.4	12561	4.8	205	0.2	0.00203065
1228	2200.7	9015	2.8	118	0.2	0.00116886
1229	2201.5	5122	2.5	107	0.4	0.0010599
1230	2201.9	11510	2.7	114	0.2	0.00112924
1231	2202.2	10368	3	126	0.2	0.00124811
1232	2202.4	9158	1.5	65	0.2	0.000643864
1233	2202.8	8010	1	40	0.3	0.000396224
1234	2203.1	8961	3.2	136	0.2	0.00134716
1235	2203.5	10122	2.3	100	0.2	0.00099056
1236	2204.1	10051	2.6	109	0.2	0.00107971
1237	2204.4	12284	2.8	119	0.2	0.00117877
1238	2204.8	6799	7.2	306	0.3	0.00303111
1239	2205.1	11273	6.5	276	0.2	0.00273394
1240	2205.6	8884	4.7	201	0.2	0.00199102
1241	2206.6	4192	31.8	1351	0.5	0.0133825
1242	2206.7	5192	34.6	1470	0.4	0.0145612
1243	2207.8	9195	5.3	225	0.2	0.00222876
1244	2208	10493	4	168	0.2	0.00166414
1245	2208.5	9291	4.5	190	0.2	0.00188206
1246	2208.8	5747	4.4	185	0.4	0.00183254
1247	2209.1	10001	6.1	257	0.2	0.00254574
1248	2209.4	6497	4.4	186	0.3	0.00184244
1249	2209.7	10307	2.1	88	0.2	0.000871692
1250	2210.1	7335	3	128	0.3	0.00126792
1251	2210.5	10272	0.9	39	0.2	0.000386318
1252	2210.8	13923	4.6	197	0.2	0.0019514
1253	2211.1	9055	2.6	111	0.2	0.00109952
1254	2211.6	16229	5.5	235	0.1	0.00232781
1255	2211.9	10184	0.7	29	0.2	0.000287262
1256	2212.2	7358	1.4	59	0.3	0.00058443
1257	2213.1	11862	1.8	77	0.2	0.000762731
1258	2213.8	9830	2.3	97	0.2	0.000960843
1259	2214.1	11023	2.3	96	0.2	0.000950937
1260	2214.8	12136	1.4	61	0.2	0.000604241
1261	2215.1	14817	0.9	37	0.1	0.000366507
1262	2215.5	6213	1.4	58	0.4	0.000574525
1263	2216.1	11078	1.7	70	0.2	0.000693392
1264	2216.8	9348	8.6	364	0.2	0.00360564
1265	2217.7	5378	5.7	242	0.4	0.00239715
1266	2218.1	10053	8.6	364	0.2	0.00360564
1267	2218.4	9086	9.6	409	0.2	0.00405139
1268	2219.2	9647	4.1	174	0.2	0.00172357
1269	2220	6900	4.8	203	0.3	0.00201084
1270	2220.3	11114	2.8	117	0.2	0.00115895
1271	2220.6	12616	3.9	164	0.2	0.00162452
1272	2220.8	8891	2.6	109	0.2	0.00107971
1273	2221.3	7608	1.2	51	0.3	0.000505185
1274	2221.6	14575	2.7	117	0.2	0.00115895
1275	2221.9	9003	1.7	72	0.2	0.000713203
1276	2222.4	12006	0.5	20	0.2	0.000198112
1277	2222.7	12874	1.4	59	0.2	0.00058443
1278	2223.1	13009	0.6	27	0.2	0.000267451
1279	2223.5	13282	1.9	80	0.2	0.000792448
1280	2224.1	6342	1.3	54	0.4	0.000534902
1281	2224.5	6067	0.5	20	0.4	0.000198112
1282	2225.1	18837	37.6	1598	0.1	0.0158291
1283	2225.7	13287	1.3	54	0.2	0.000534902
1284	2226.1	18988	50.7	2154	0.1	0.0213367
1285	2226.6	8709	3.7	156	0.3	0.00154527
1286	2227.1	17877	35.5	1507	0.1	0.0149277
1287	2227.5	6872	1.3	55	0.3	0.000544808
1288	2228.1	16229	15.2	647	0.1	0.00640892
1289	2228.6	9519	5.1	217	0.2	0.00214951
1290	2229.1	6911	6.9	295	0.3	0.00292215
1291	2229.5	5722	4.7	198	0.4	0.00196131
1292	2230.1	5252	4.9	207	0.4	0.00205046
1293	2230.7	5256	2.7	115	0.4	0.00113914
1294	2230.9	7883	3.4	146	0.3	0.00144622
1295	2231.5	8247	1.5	65	0.3	0.000643864
1296	2231.9	6259	2.8	117	0.4	0.00115895
1297	2232.5	7169	2	85	0.3	0.000841976
1298	2233.2	10752	1.3	56	0.2	0.000554713
1299	2234.9	7838	1.1	46	0.3	0.000455657
1300	2235.7	6410	0.4	19	0.3	0.000188206
1301	2235.9	8127	0.5	21	0.3	0.000208018
1302	2236.2	14071	2.2	94	0.2	0.000931126
1303	2236.7	8157	0.2	10	0.3	9.9056e-05
1304	2237.1	11423	1.5	63	0.2	0.000624053
1305	2237.5	11836	0.4	15	0.2	0.000148584
1306	2237.8	13231	1.1	47	0.2	0.000465563
1307	2238.1	14390	1	44	0.2	0.000435846
1308	2238.6	9448	0.8	34	0.2	0.00033679
1309	2239.4	9108	2.7	114	0.2	0.00112924
1310	2240.2	11273	3.5	147	0.2	0.00145612
1311	2240.8	12661	1.8	76	0.2	0.000752825
1312	2241.7	6710	0.8	33	0.3	0.000326885
1313	2242.3	10789	2.7	113	0.2	0.00111933
1314	2242.5	11981	1.7	72	0.2	0.000713203
1315	2243.1	10577	1.3	53	0.2	0.000524997
1316	2243.6	8974	0.7	28	0.3	0.000277357
1317	2243.8	8302	1.5	64	0.3	0.000633958
1318	2244.1	12988	2.6	110	0.2	0.00108962
1319	2244.5	9816	0.8	33	0.2	0.000326885
1320	2245.2	17352	2.8	120	0.1	0.00118867
1321	2245.5	16808	2	86	0.1	0.000851881
1322	2246.1	15268	0.9	36	0.1	0.000356601
1323	2246.5	15056	0.8	35	0.1	0.000346696
1324	2247	15497	4.1	173	0.1	0.00171367
1325	2247.6	13160	0.3	11	0.2	0.000108962
1326	2248.1	15234	5.8	246	0.1	0.00243678
1327	2248.4	7109	1.6	69	0.3	0.000683486
1328	2249	16303	7	295	0.1	0.00292215
1329	2249.4	7101	1.6	68	0.3	0.000673581
1330	2249.6	8998	1.6	68	0.3	0.000673581
1331	2249.8	9630	2.3	96	0.2	0.000950937
1332	2250.1	10840	5.3	226	0.2	0.00223866
1333	2250.3	9372	4.6	195	0.2	0.00193159
1334	2250.7	8128	3.8	162	0.3	0.00160471
1335	2251.1	11700	6.1	261	0.2	0.00258536
1336	2251.4	13676	1.7	71	0.2	0.000703297
1337	2251.8	11473	3.7	158	0.2	0.00156508
1338	2252.1	10096	2.4	101	0.2	0.00100047
1339	2252.5	8863	2.8	119	0.3	0.00117877
1340	2252.8	11890	1.6	69	0.2	0.000683486
1341	2253.1	13080	3.7	157	0.2	0.00155518
1342	2253.5	7273	2.7	116	0.3	0.00114905
1343	2253.7	7796	2.6	112	0.3	0.00110943
1344	2254	7910	3.5	147	0.3	0.00145612
1345	2254.5	12678	2.4	100	0.2	0.00099056
1346	2254.8	9319	2.9	123	0.2	0.00121839
1347	2255.2	11481	3.6	155	0.2	0.00153537
1348	2255.5	8383	2.8	119	0.3	0.00117877
1349	2256	8753	5.3	226	0.3	0.00223866
1350	2256.3	8202	6.3	267	0.3	0.00264479
1351	2256.9	8640	8.9	378	0.3	0.00374432
1352	2257.2	9181	14.1	599	0.2	0.00593345
1353	2257.6	5895	8.4	356	0.4	0.00352639
1354	2257.9	9200	3.4	145	0.2	0.00143631
1355	2258.2	14055	6.5	278	0.2	0.00275376
1356	2258.5	10379	3.9	167	0.2	0.00165423
1357	2258.8	8685	4.4	186	0.3	0.00184244
1358	2259.1	11689	5.1	219	0.2	0.00216933
1359	2259.5	15201	5.5	232	0.1	0.0022981
1360	2259.7	9598	2.3	98	0.2	0.000970748
1361	2260.1	6849	4.5	192	0.3	0.00190187
1362	2260.8	11875	2.7	113	0.2	0.00111933
1363	2261.2	8302	1.9	80	0.3	0.000792448
1364	2261.4	10301	3	129	0.2	0.00127782
1365	2261.7	8142	2.5	108	0.3	0.0010698
1366	2262	9725	4.4	188	0.2	0.00186225
1367	2262.2	10090	4.8	204	0.2	0.00202074
1368	2262.6	13709	3.6	154	0.2	0.00152546
1369	2263.1	12853	5.7	241	0.2	0.00238725
1370	2263.6	11363	3.3	142	0.2	0.00140659
1371	2264.1	9717	3.2	135	0.2	0.00133726
1372	2264.4	9507	2.7	113	0.2	0.00111933
1373	2264.9	12234	6	253	0.2	0.00250612
1374	2265.2	10207	4.5	191	0.2	0.00189197
1375	2265.5	10854	2.5	106	0.2	0.00104999
1376	2265.8	10983	3.1	134	0.2	0.00132735
1377	2266	9668	4.2	180	0.2	0.00178301
1378	2266.3	6916	4.2	177	0.3	0.00175329
1379	2266.8	7205	2.7	116	0.3	0.00114905
1380	2267.1	9814	2.7	114	0.2	0.00112924
1381	2267.4	9789	4.7	200	0.2	0.00198112
1382	2267.6	10799	2.9	123	0.2	0.00121839
1383	2268.2	5946	3.7	158	0.4	0.00156508
1384	2268.9	8727	13.5	573	0.3	0.00567591
1385	2269.2	5614	18.2	771	0.4	0.00763721
1386	2269.7	6398	13.6	576	0.4	0.00570562
1387	2270.6	3931	12.7	539	0.6	0.00533912
1388	2271	4790	18.4	783	0.5	0.00775608
1389	2271.4	9086	15.4	652	0.3	0.00645845
1390	2271.8	7573	10.7	453	0.3	0.00448723
1391	2272.1	7778	10	425	0.3	0.00420988
1392	2272.4	5635	7.3	308	0.4	0.00305092
1393	2272.8	6286	7.9	335	0.4	0.00331837
1394	2273.1	5922	5.8	245	0.4	0.00242687
1395	2273.5	21123	106.7	4532	0.1	0.0448922
1396	2274	7616	9.2	391	0.3	0.00387309
1397	2274.2	8056	7.6	322	0.3	0.0031896
1398	2274.6	7114	10.1	430	0.3	0.00425941
1399	2275.1	21467	92.7	3939	0.1	0.0390181
1400	2275.4	11091	9	382	0.2	0.00378394
1401	2276	5727	5.5	235	0.4	0.00232781
1402	2276.6	18847	40.4	1717	0.1	0.0170079
1403	2277.1	6965	5.8	245	0.3	0.00242687
1404	2277.7	9986	7.1	304	0.2	0.0030113
1405	2278.1	16978	21.5	913	0.1	0.00904381
1406	2278.5	6459	5	213	0.4	0.00210989
1407	2279.1	6370	5.7	242	0.4	0.00239715
1408	2279.5	8096	6.1	258	0.3	0.00255564
1409	2279.8	9119	4	169	0.3	0.00167405
1410	2280	8255	5.6	237	0.3	0.00234763
1411	2280.4	8621	5.8	245	0.3	0.00242687
1412	2280.7	9025	5.4	229	0.3	0.00226838
1413	2281	8872	8	340	0.3	0.0033679
1414	2281.5	11586	7.7	329	0.2	0.00325894
1415	2281.8	9506	6	257	0.2	0.00254574
1416	2282.8	8301	32.8	1393	0.3	0.0137985
1417	2283.8	4665	7.7	328	0.5	0.00324904
1418	2284.5	9138	4.9	209	0.3	0.00207027
1419	2284.8	7163	7.6	324	0.3	0.00320941
1420	2285.1	5323	8.8	374	0.4	0.00370469
1421	2285.5	6058	8.8	375	0.4	0.0037146
1422	2285.7	9949	8.2	347	0.2	0.00343724
1423	2286.2	8505	6.9	291	0.3	0.00288253
1424	2287	5868	6	255	0.4	0.00252593
1425	2287.2	8677	6.7	283	0.3	0.00280328
1426	2287.7	8368	4.9	206	0.3	0.00204055
1427	2288	7689	5.1	216	0.3	0.00213961
1428	2288.5	5086	4.2	178	0.4	0.0017632
1429	2288.7	7273	5.4	229	0.3	0.00226838
1430	2289.1	7796	4.8	202	0.3	0.00200093
1431	2289.3	5723	5.9	249	0.4	0.00246649
1432	2289.6	5109	6.5	277	0.4	0.00274385
1433	2290.2	9922	7.5	318	0.2	0.00314998
1434	2290.6	9158	5.4	229	0.3	0.00226838
1435	2291.1	4853	3.3	141	0.5	0.00139669
1436	2291.5	4021	3.9	164	0.6	0.00162452
1437	2291.9	10357	4.9	206	0.2	0.00204055
1438	2292.2	12054	5.5	232	0.2	0.0022981
1439	2292.5	7299	2.8	120	0.3	0.00118867
1440	2292.8	9788	4.5	192	0.2	0.00190187
1441	2293.2	8252	6.5	278	0.3	0.00275376
1442	2293.6	9576	5.6	238	0.2	0.00235753
1443	2294	3818	5.3	223	0.6	0.00220895
1444	2294.4	5618	5.9	252	0.4	0.00249621
1445	2294.7	7579	6.7	283	0.3	0.00280328
1446	2295.1	10824	6.6	278	0.2	0.00275376
1447	2295.5	11746	5	212	0.2	0.00209999
1448	2296.1	7089	5.7	240	0.3	0.00237734
1449	2296.3	8051	4	170	0.3	0.00168395
1450	2296.8	10569	4.7	198	0.2	0.00196131
1451	2297.1	12010	4.8	206	0.2	0.00204055
1452	2297.5	6104	4.4	188	0.4	0.00186225
1453	2298.1	10077	6.6	280	0.2	0.00277357
1454	2298.6	6613	2.9	121	0.3	0.00119858
1455	2299.1	11231	6	256	0.2	0.00253583
1456	2299.3	6570	2.4	102	0.3	0.00101037
1457	2300	6490	3.7	159	0.4	0.00157499
1458	2300.4	14022	5.1	218	0.2	0.00215942
1459	2300.7	8675	4.2	179	0.3	0.0017731
1460	2301.2	8024	4.1	175	0.3	0.00173348
1461	2301.4	7328	3.8	163	0.3	0.00161461
1462	2302	7999	5.5	234	0.3	0.00231791
1463	2302.3	5667	5.3	227	0.4	0.00224857
1464	2302.7	5519	5.9	252	0.4	0.00249621
1465	2303.2	7242	4.9	209	0.3	0.00207027
1466	2303.6	6886	4	170	0.3	0.00168395
1467	2304	11742	5.4	229	0.2	0.00226838
1468	2304.3	9629	4.6	195	0.2	0.00193159
1469	2304.6	14846	4.1	175	0.2	0.00173348
1470	2304.9	12913	4.8	204	0.2	0.00202074
1471	2305.2	6987	5	210	0.3	0.00208018
1472	2305.8	12652	3.8	161	0.2	0.0015948
1473	2306.2	10724	2.9	124	0.2	0.00122829
1474	2306.6	9408	2.4	104	0.2	0.00103018
1475	2306.8	7689	2.6	111	0.3	0.00109952
1476	2307.2	4828	3.4	145	0.5	0.00143631
1477	2307.5	6945	4.1	174	0.3	0.00172357
1478	2308	10607	5.2	220	0.2	0.00217923
1479	2308.3	10271	2.7	116	0.2	0.00114905
1480	2308.6	10100	3.2	134	0.2	0.00132735
1481	2308.9	9459	3.1	133	0.2	0.00131744
1482	2309.2	6515	2.9	123	0.4	0.00121839
1483	2309.5	12915	5.9	250	0.2	0.0024764
1484	2309.9	5703	3	129	0.4	0.00127782
1485	2310.3	11695	5.6	237	0.2	0.00234763
1486	2310.8	7087	4.7	198	0.3	0.00196131
1487	2311.1	15517	9.8	414	0.1	0.00410092
1488	2311.5	8564	4.9	207	0.3	0.00205046
1489	2311.9	8540	7.2	305	0.3	0.00302121
1490	2312.4	6929	7.5	318	0.3	0.00314998
1491	2312.7	6063	6.2	263	0.4	0.00260517
1492	2313.1	14505	9.3	395	0.2	0.00391271
1493	2313.7	8571	3.6	152	0.3	0.00150565
1494	2314.1	15802	8.7	371	0.1	0.00367498
1495	2314.4	8444	1.8	76	0.3	0.000752825
1496	2314.8	12053	3.4	147	0.2	0.00145612
1497	2315.1	14855	5.7	244	0.2	0.00241697
1498	2315.5	8843	4.2	178	0.3	0.0017632
1499	2315.8	8685	3.4	145	0.3	0.00143631
1500	2316.1	8291	3.9	164	0.3	0.00162452
1501	2316.4	10415	3.5	147	0.2	0.00145612
1502	2316.7	11427	3	127	0.2	0.00125801
1503	2317.1	11050	6.4	274	0.2	0.00271413
1504	2317.6	11392	3.4	145	0.2	0.00143631
1505	2317.9	9512	3.5	148	0.2	0.00146603
1506	2318.4	6207	4.2	177	0.4	0.00175329
1507	2318.7	6699	3.3	139	0.3	0.00137688
1508	2319.1	11518	4.2	178	0.2	0.0017632
1509	2319.4	5381	2.9	122	0.4	0.00120848
1510	2319.8	7678	3.9	164	0.3	0.00162452
1511	2320.1	7752	4.6	196	0.3	0.0019415
1512	2320.4	14665	3.2	135	0.2	0.00133726
1513	2320.8	7643	3	125	0.3	0.0012382
1514	2321.1	7578	2.4	100	0.3	0.00099056
1515	2321.6	5491	3.2	135	0.4	0.00133726
1516	2322.1	9816	4.3	181	0.2	0.00179291
1517	2322.5	7483	3.4	145	0.3	0.00143631
1518	2323.1	10599	5.6	236	0.2	0.00233772
1519	2323.7	10416	4.3	182	0.2	0.00180282
1520	2324.1	10000	6.2	264	0.2	0.00261508
1521	2324.6	5567	6.1	258	0.4	0.00255564
1522	2325.1	11972	7.4	316	0.2	0.00313017
1523	2325.5	10817	7.6	324	0.2	0.00320941
1524	2325.8	5523	7.8	330	0.4	0.00326885
1525	2326.3	4965	7	296	0.5	0.00293206
1526	2326.7	9766	5.6	239	0.2	0.00236744
1527	2326.9	9588	4.8	206	0.2	0.00204055
1528	2327.2	7260	5.7	241	0.3	0.00238725
1529	2327.5	8583	5.1	217	0.3	0.00214951
1530	2327.8	10010	5.4	231	0.2	0.00228819
1531	2328.2	13400	6.8	288	0.2	0.00285281
1532	2328.5	11184	5.1	216	0.2	0.00213961
1533	2329	9869	4.6	194	0.2	0.00192169
1534	2329.2	10104	5.9	252	0.2	0.00249621
1535	2329.5	7761	5	210	0.3	0.00208018
1536	2330	8584	4.9	206	0.3	0.00204055
1537	2330.2	7560	4.3	182	0.3	0.00180282
1538	2330.7	7466	3.9	167	0.3	0.00165423
1539	2331.2	8645	5	213	0.3	0.00210989
1540	2331.5	5476	2.2	93	0.4	0.00092122
1541	2332.2	4126	3.5	147	0.6	0.00145612
1542	2332.6	6987	3.6	154	0.3	0.00152546
1543	2333.1	5417	3.9	166	0.4	0.00164433
1544	2333.7	9903	5.1	216	0.2	0.00213961
1545	2334	9820	3.1	130	0.2	0.00128773
1546	2334.3	9170	4.8	204	0.3	0.00202074
1547	2334.7	9278	3.6	151	0.3	0.00149574
1548	2335.1	10397	5.6	238	0.2	0.00235753
1549	2335.5	5964	2.9	123	0.4	0.00121839
1550	2335.9	8811	2.7	117	0.3	0.00115895
1551	2336.3	7166	4.3	181	0.3	0.00179291
1552	2336.8	8199	4.8	205	0.3	0.00203065
1553	2337.2	9827	4.1	174	0.2	0.00172357
1554	2337.6	11250	2.6	110	0.2	0.00108962
1555	2337.9	12801	2.8	120	0.2	0.00118867
1556	2338.3	12047	2.5	106	0.2	0.00104999
1557	2338.7	14802	4.4	187	0.2	0.00185235
1558	2339.1	12591	3.5	149	0.2	0.00147593
1559	2339.4	8456	2.7	116	0.3	0.00114905
1560	2339.6	10518	4.7	199	0.2	0.00197121
1561	2340.1	11297	5.8	247	0.2	0.00244668
1562	2340.4	12529	3.1	133	0.2	0.00131744
1563	2340.7	8343	2.9	121	0.3	0.00119858
1564	2341.1	15521	5.7	242	0.2	0.00239715
1565	2341.6	9850	2.7	113	0.2	0.00111933
1566	2342	12621	2.6	112	0.2	0.00110943
1567	2342.4	13851	3.1	133	0.2	0.00131744
1568	2342.7	10035	4.9	207	0.2	0.00205046
1569	2343.2	7307	3.2	135	0.3	0.00133726
1570	2343.8	8881	2.7	113	0.3	0.00111933
1571	2344.1	8782	5.5	234	0.3	0.00231791
1572	2344.6	14849	5.1	219	0.2	0.00216933
1573	2345	9482	4.3	181	0.2	0.00179291
1574	2345.4	7090	2.8	120	0.3	0.00118867
1575	2345.9	12466	4.4	189	0.2	0.00187216
1576	2346.2	9132	6	257	0.3	0.00254574
1577	2346.6	9846	7	297	0.2	0.00294196
1578	2347.1	6133	4.3	184	0.4	0.00182263
1579	2347.7	6730	4	171	0.3	0.00169386
1580	2348.4	12447	7.7	326	0.2	0.00322922
1581	2349	7304	4.5	192	0.3	0.00190187
1582	2349.7	9649	4.3	184	0.2	0.00182263
1583	2350.1	7875	5.1	216	0.3	0.00213961
1584	2350.5	8837	7.4	314	0.3	0.00311036
1585	2350.9	5914	5.6	239	0.4	0.00236744
1586	2351.4	8633	5.1	217	0.3	0.00214951
1587	2351.8	5451	9	384	0.4	0.00380375
1588	2352.3	9409	7	299	0.3	0.00296177
1589	2352.6	6757	9	383	0.3	0.00379384
1590	2353.2	7844	17	722	0.3	0.00715184
1591	2353.7	6725	9.6	409	0.3	0.00405139
1592	2354	6741	7.6	325	0.3	0.00321932
1593	2354.4	5965	8	341	0.4	0.00337781
1594	2355.2	3292	30.4	1290	0.7	0.0127782
1595	2356.8	7138	4.9	208	0.3	0.00206036
1596	2357.4	5086	6.1	260	0.5	0.00257545
1597	2357.8	4672	7.8	330	0.5	0.00326885
1598	2358.2	4899	6	254	0.5	0.00251602
1599	2358.6	9776	4.7	199	0.2	0.00197121
1600	2359.1	18339	75.5	3206	0.1	0.0317573
1601	2359.5	6152	4.3	182	0.4	0.00180282
1602	2359.8	7866	3.6	152	0.3	0.00150565
1603	2360.4	4806	4.7	200	0.5	0.00198112
1604	2360.7	4709	3.7	158	0.5	0.00156508
1605	2361.3	7459	4.6	195	0.3	0.00193159
1606	2361.6	9475	2.7	115	0.2	0.00113914
1607	2362.1	17666	31.5	1339	0.1	0.0132636
1608	2362.4	11926	5.5	232	0.2	0.0022981
1609	2362.7	11410	8.1	344	0.2	0.00340752
1610	2363	6064	5.4	230	0.4	0.00227829
1611	2363.4	7818	9.7	413	0.3	0.00409101
1612	2364.3	9457	62.2	2641	0.3	0.0261607
1613	2364.5	4477	62.7	2665	0.5	0.0263984
1614	2365	7919	32.1	1363	0.3	0.0135013
1615	2365.8	9210	7.8	332	0.3	0.00328866
1616	2366.1	10919	7	296	0.2	0.00293206
1617	2366.4	13420	20.2	859	0.2	0.00850891
1618	2367	11873	19.6	834	0.2	0.00826127
1619	2367.3	8623	7.7	327	0.3	0.00323913
1620	2367.6	13716	14.6	621	0.2	0.00615137
1621	2368.2	12630	11.1	470	0.2	0.00465563
1622	2368.8	5952	7.9	338	0.4	0.00334809
1623	2369.1	6769	5.6	236	0.3	0.00233772
1624	2369.5	5889	6.8	288	0.4	0.00285281
1625	2369.8	7268	10	423	0.3	0.00419007
1626	2370.1	8441	11.6	492	0.3	0.00487355
1627	2370.5	6012	7.9	335	0.4	0.00331837
1628	2371.1	14931	15.1	640	0.2	0.00633958
1629	2371.5	9883	6.1	258	0.2	0.00255564
1630	2371.7	13311	8.1	344	0.2	0.00340752
1631	2372.1	22861	92.6	3931	0.1	0.0389389
1632	2372.5	11336	7.6	321	0.2	0.0031797
1633	2373.1	19501	147.4	6261	0.1	0.0620189
1634	2373.6	9800	4.3	182	0.2	0.00180282
1635	2374.1	20342	97.7	4148	0.1	0.0410884
1636	2374.8	8720	4.8	205	0.3	0.00203065
1637	2375.1	19658	47	1996	0.1	0.0197716
1638	2375.5	10472	5.1	215	0.2	0.0021297
1639	2375.8	8733	6.3	267	0.3	0.00264479
1640	2376.1	18578	26	1104	0.1	0.0109358
1641	2376.5	11464	6.9	293	0.2	0.00290234
1642	2376.8	12772	6.3	268	0.2	0.0026547
1643	2377.2	14467	14.1	599	0.2	0.00593345
1644	2377.5	9069	5.8	246	0.3	0.00243678
1645	2377.8	9511	7.3	308	0.3	0.00305092
1646	2378.1	8952	10.3	439	0.3	0.00434856
1647	2378.5	10973	7.1	300	0.2	0.00297168
1648	2378.7	9136	6.4	272	0.3	0.00269432
1649	2379.1	12053	8.8	372	0.2	0.00368488
1650	2379.4	8652	3.6	152	0.3	0.00150565
1651	2379.7	9268	7.3	309	0.3	0.00306083
1652	2380.2	10796	7.4	316	0.2	0.00313017
1653	2380.6	6604	4.6	197	0.4	0.0019514
1654	2381	11233	6.1	260	0.2	0.00257545
1655	2381.6	5324	4.6	194	0.4	0.00192169
1656	2382.1	5927	5.4	227	0.4	0.00224857
1657	2382.6	7942	6.2	262	0.3	0.00259527
1658	2383.1	8655	8.5	360	0.3	0.00356601
1659	2383.8	7418	10.4	440	0.3	0.00435846
1660	2384.1	5427	11.3	480	0.4	0.00475469
1661	2384.6	9195	8	338	0.3	0.00334809
1662	2384.9	7856	6	255	0.3	0.00252593
1663	2385.2	7941	5.9	252	0.3	0.00249621
1664	2385.6	7094	3.6	152	0.3	0.00150565
1665	2386.1	11095	6.8	288	0.2	0.00285281
1666	2386.5	12899	2.9	121	0.2	0.00119858
1667	2386.9	10120	3.3	142	0.2	0.00140659
1668	2387.5	7480	4.9	207	0.3	0.00205046
1669	2387.9	8849	4.4	187	0.3	0.00185235
1670	2388.2	11027	7.3	308	0.2	0.00305092
1671	2388.5	8710	2.9	123	0.3	0.00121839
1672	2388.8	11716	3.8	160	0.2	0.0015849
1673	2389.2	11299	4.6	196	0.2	0.0019415
1674	2389.5	10404	3.9	165	0.2	0.00163442
1675	2389.8	10842	5.2	220	0.2	0.00217923
1676	2390.2	7987	2.9	125	0.3	0.0012382
1677	2390.5	10523	6.1	261	0.2	0.00258536
1678	2390.8	6837	4.6	195	0.3	0.00193159
1679	2391.2	10892	4.9	206	0.2	0.00204055
1680	2391.5	6954	3.5	149	0.3	0.00147593
1681	2391.9	10637	5.1	217	0.2	0.00214951
1682	2392.2	6804	3.5	149	0.4	0.00147593
1683	2392.5	12993	3.7	157	0.2	0.00155518
1684	2392.8	15599	2.9	123	0.2	0.00121839
1685	2393.3	8857	2.9	123	0.3	0.00121839
1686	2393.6	10658	4.3	182	0.2	0.00180282
1687	2394.1	16651	16.7	709	0.1	0.00702307
1688	2394.5	15061	3	128	0.2	0.00126792
1689	2394.7	15087	4.8	203	0.2	0.00201084
1690	2395.1	16991	18.9	802	0.1	0.00794429
1691	2395.7	10896	3.5	147	0.2	0.00145612
1692	2396.1	15715	10.9	464	0.2	0.0045962
1693	2396.5	14037	5.3	226	0.2	0.00223866
1694	2396.8	8749	1.9	81	0.3	0.000802353
1695	2397.1	13525	8.7	371	0.2	0.00367498
1696	2397.7	8028	3.7	157	0.3	0.00155518
1697	2398.1	10232	5.9	252	0.2	0.00249621
1698	2398.4	8503	3.2	137	0.3	0.00135707
1699	2398.7	9833	5.3	225	0.2	0.00222876
1700	2399.1	10868	6.8	287	0.2	0.00284291
1701	2399.5	6856	4.5	191	0.3	0.00189197
1702	2400.1	11871	6	254	0.2	0.00251602
1703	2400.5	8968	3.3	139	0.3	0.00137688
1704	2400.8	7396	4.5	190	0.3	0.00188206
1705	2401.1	8084	6.5	275	0.3	0.00272404
1706	2401.7	5718	3.2	135	0.4	0.00133726
1707	2402.1	11626	5.1	215	0.2	0.0021297
1708	2402.7	8299	6.5	278	0.3	0.00275376
1709	2403.1	11671	6.6	279	0.2	0.00276366
1710	2403.5	7091	4.5	193	0.3	0.00191178
1711	2404.2	10768	6.6	280	0.2	0.00277357
1712	2404.6	5452	3	127	0.4	0.00125801
1713	2405.1	12553	5.6	238	0.2	0.00235753
1714	2405.7	7747	5.5	233	0.3	0.002308
1715	2406.2	9489	6.6	278	0.3	0.00275376
1716	2406.7	9027	6.5	278	0.3	0.00275376
1717	2407.1	6792	5.6	237	0.4	0.00234763
1718	2407.7	7206	5.2	222	0.3	0.00219904
1719	2408.2	11281	5.2	220	0.2	0.00217923
1720	2408.6	7669	7.2	308	0.3	0.00305092
1721	2409	8156	5.6	236	0.3	0.00233772
1722	2409.2	8031	5.3	226	0.3	0.00223866
1723	2409.5	4381	5.8	246	0.6	0.00243678
1724	2409.9	9640	5.6	239	0.3	0.00236744
1725	2410.1	6829	9.3	395	0.4	0.00391271
1726	2410.7	5075	5.5	233	0.5	0.002308
1727	2411.2	6028	5.6	237	0.4	0.00234763
1728	2411.7	6539	6.7	286	0.4	0.002833
1729	2412.1	4070	6.5	276	0.6	0.00273394
1730	2412.4	8041	6.3	268	0.3	0.0026547
1731	2412.6	8032	4.9	206	0.3	0.00204055
1732	2413.1	10252	6.5	276	0.2	0.00273394
1733	2413.7	6828	2.5	108	0.4	0.0010698
1734	2414.4	7344	3	126	0.3	0.00124811
1735	2414.7	14300	4	168	0.2	0.00166414
1736	2415.2	8386	5.5	234	0.3	0.00231791
1737	2415.6	8784	1.9	82	0.3	0.000812259
1738	2415.8	10121	2.5	107	0.2	0.0010599
1739	2416.1	12987	6.3	270	0.2	0.00267451
1740	2416.5	10740	1.2	53	0.2	0.000524997
1741	2416.8	10927	2.2	94	0.2	0.000931126
1742	2417.1	12423	4.5	191	0.2	0.00189197
1743	2417.5	9178	2.8	120	0.3	0.00118867
1744	2417.7	8752	3	126	0.3	0.00124811
1745	2418.2	10423	5.1	217	0.2	0.00214951
1746	2418.6	12768	2.2	91	0.2	0.000901409
1747	2419.2	11324	5.4	230	0.2	0.00227829
1748	2419.7	12720	3.7	158	0.2	0.00156508
1749	2420.1	12106	3.9	167	0.2	0.00165423
1750	2420.5	9569	4.4	188	0.3	0.00186225
1751	2421.1	9333	4.6	196	0.3	0.0019415
1752	2421.5	6919	2.9	121	0.3	0.00119858
1753	2422.2	23697	135	5732	0.1	0.0567789
1754	2422.7	7980	3	129	0.3	0.00127782
1755	2422.9	12355	4.3	181	0.2	0.00179291
1756	2423.2	16323	6.8	290	0.1	0.00287262
1757	2423.7	24051	121.9	5178	0.1	0.0512912
1758	2424.1	9094	7.6	322	0.3	0.0031896
1759	2424.6	8082	3.6	155	0.3	0.00153537
1760	2424.8	10861	3.6	151	0.2	0.00149574
1761	2425.2	21923	64.8	2750	0.1	0.0272404
1762	2426.1	11798	13.7	583	0.2	0.00577496
1763	2426.3	12746	14.5	616	0.2	0.00610185
1764	2426.7	18184	33	1404	0.1	0.0139075
1765	2427.1	11258	12.4	528	0.2	0.00523015
1766	2427.5	9126	7.8	330	0.3	0.00326885
1767	2427.8	6188	5.8	246	0.4	0.00243678
1768	2428.2	14102	14.9	632	0.2	0.00626034
1769	2428.5	9620	4.4	189	0.3	0.00187216
1770	2428.8	7948	5.8	247	0.3	0.00244668
1771	2429.1	10643	9.9	419	0.2	0.00415044
1772	2429.5	6982	5.5	233	0.3	0.002308
1773	2429.7	11249	8.6	363	0.2	0.00359573
1774	2430	11808	9.4	401	0.2	0.00397214
1775	2430.4	6194	6.3	269	0.4	0.00266461
1776	2430.7	6157	8.9	378	0.4	0.00374432
1777	2431.1	6371	8.1	344	0.4	0.00340752
1778	2431.6	9648	5.6	236	0.3	0.00233772
1779	2432.1	7731	4	170	0.3	0.00168395
1780	2432.5	5835	3.2	135	0.4	0.00133726
1781	2432.6	10812	2.8	118	0.2	0.00116886
1782	2433	8110	3.5	148	0.3	0.00146603
1783	2433.4	8429	3.4	144	0.3	0.00142641
1784	2433.6	8255	2.6	112	0.3	0.00110943
1785	2434.1	9678	4.6	197	0.3	0.0019514
1786	2434.3	11773	6	255	0.2	0.00252593
1787	2434.6	9595	4	172	0.3	0.00170376
1788	2434.9	9962	3.5	149	0.2	0.00147593
1789	2435.3	9955	3.6	153	0.2	0.00151556
1790	2435.9	6539	5.2	220	0.4	0.00217923
1791	2436.3	9197	5.7	240	0.3	0.00237734
1792	2436.6	10741	3.5	148	0.2	0.00146603
1793	2437.1	8235	3.6	153	0.3	0.00151556
1794	2437.3	9537	2.7	115	0.3	0.00113914
1795	2437.7	15777	4.3	183	0.2	0.00181272
1796	2438.1	10589	1.9	81	0.2	0.000802353
1797	2438.3	12891	4.4	187	0.2	0.00185235
1798	2438.6	11682	5	214	0.2	0.0021198
1799	2439	8545	4.1	175	0.3	0.00173348
1800	2439.4	11451	5.6	237	0.2	0.00234763
1801	2439.8	13771	6.5	275	0.2	0.00272404
1802	2440.1	13021	6.6	281	0.2	0.00278347
1803	2440.5	6973	2.9	121	0.3	0.00119858
1804	2440.8	7829	4.9	208	0.3	0.00206036
1805	2441.2	7721	6.3	267	0.3	0.00264479
1806	2441.6	14686	8.6	364	0.2	0.00360564
1807	2442	17217	14.7	623	0.1	0.00617119
1808	2442.2	13957	11.4	485	0.2	0.00480421
1809	2442.8	9967	9.5	402	0.2	0.00398205
1810	2443.2	15037	49.9	2119	0.2	0.02099
1811	2443.6	6878	23.2	984	0.4	0.00974711
1812	2443.9	7325	26	1106	0.3	0.0109556
1813	2444.2	8480	35.7	1517	0.3	0.0150268
1814	2444.7	13300	39.8	1689	0.2	0.0167306
1815	2445.2	8440	27.6	1174	0.3	0.0116292
1816	2445.6	5914	22.2	945	0.4	0.00936079
1817	2445.9	7076	23.4	992	0.3	0.00982635
1818	2446.2	7788	26.3	1118	0.3	0.0110745
1819	2446.5	6432	14.9	633	0.4	0.00627024
1820	2446.8	7676	14.9	634	0.3	0.00628015
1821	2447.2	11584	12.1	514	0.2	0.00509148
1822	2447.7	13462	11.5	490	0.2	0.00485374
1823	2448.1	5853	7.5	317	0.4	0.00314007
1824	2448.4	9794	6.2	264	0.3	0.00261508
1825	2448.7	6502	7.8	332	0.4	0.00328866
1826	2449.1	5367	7.2	307	0.5	0.00304102
1827	2449.5	6296	6.6	281	0.4	0.00278347
1828	2449.9	12341	8.8	375	0.2	0.0037146
1829	2450.3	6858	5.4	230	0.4	0.00227829
1830	2450.7	8757	5.7	242	0.3	0.00239715
1831	2451.7	5272	28.9	1226	0.5	0.0121443
1832	2452	5769	33.2	1412	0.4	0.0139867
1833	2452.7	7578	13.4	567	0.3	0.00561647
1834	2453.1	9370	8.5	360	0.3	0.00356601
1835	2453.6	6700	7.5	321	0.4	0.0031797
1836	2454.2	8924	6.9	293	0.3	0.00290234
1837	2454.5	6152	9.3	396	0.4	0.00392262
1838	2454.8	5336	7.8	332	0.5	0.00328866
1839	2455.2	8384	9.9	419	0.3	0.00415044
1840	2455.6	7906	11	466	0.3	0.00461601
1841	2456.2	8520	11.4	483	0.3	0.0047844
1842	2456.5	8188	10.6	451	0.3	0.00446742
1843	2456.8	8856	13.1	556	0.3	0.00550751
1844	2457.2	6398	12.2	519	0.4	0.005141
1845	2457.7	5881	15.6	661	0.4	0.0065476
1846	2458.2	5459	13.4	568	0.5	0.00562638
1847	2458.7	5633	10	425	0.4	0.00420988
1848	2459.2	5298	10.8	461	0.5	0.00456648
1849	2459.7	6179	8.9	379	0.4	0.00375422
1850	2460.3	12118	10.1	430	0.2	0.00425941
1851	2460.7	9161	5.7	240	0.3	0.00237734
1852	2461.2	6967	7.6	323	0.4	0.00319951
1853	2461.7	9825	6.8	290	0.3	0.00287262
1854	2462.3	7823	6.8	289	0.3	0.00286272
1855	2462.6	9186	8	342	0.3	0.00338771
1856	2462.8	8256	7.6	325	0.3	0.00321932
1857	2463.2	5382	7.4	314	0.5	0.00311036
1858	2463.6	7223	6.6	281	0.3	0.00278347
1859	2464.1	7626	6.8	287	0.3	0.00284291
1860	2464.5	9858	5.5	235	0.3	0.00232781
1861	2464.7	11382	10.4	443	0.2	0.00438818
1862	2465.1	7336	6.8	288	0.3	0.00285281
1863	2465.6	6086	4.1	173	0.4	0.00171367
1864	2465.9	11716	3.8	160	0.2	0.0015849
1865	2466.2	17523	15.5	657	0.1	0.00650798
1866	2466.6	11096	5.4	230	0.2	0.00227829
1867	2466.9	10384	3.8	163	0.2	0.00161461
1868	2467.2	20569	22.6	959	0.1	0.00949947
1869	2467.7	12352	6.2	265	0.2	0.00262498
1870	2468.2	17808	16.3	693	0.1	0.00686458
1871	2468.6	10036	4.9	208	0.2	0.00206036
1872	2468.9	9807	3.5	150	0.3	0.00148584
1873	2469.2	13711	10.5	447	0.2	0.0044278
1874	2469.6	5892	5.6	239	0.4	0.00236744
1875	2469.8	9248	4.7	199	0.3	0.00197121
1876	2470.2	18718	27.1	1152	0.1	0.0114112
1877	2470.5	10373	8.8	373	0.2	0.00369479
1878	2471.2	19276	29.2	1240	0.1	0.0122829
1879	2471.6	5469	7.9	338	0.5	0.00334809
1880	2472.2	17901	31.6	1341	0.1	0.0132834
1881	2472.6	11953	9.7	412	0.2	0.00408111
1882	2472.9	11921	4.5	191	0.2	0.00189197
1883	2473.2	19212	30.1	1277	0.1	0.0126494
1884	2473.5	13718	8.6	364	0.2	0.00360564
1885	2473.8	10051	5.1	216	0.2	0.00213961
1886	2474.2	18130	19.7	836	0.1	0.00828108
1887	2474.5	8832	6.6	279	0.3	0.00276366
1888	2474.8	9719	6.6	282	0.3	0.00279338
1889	2475.2	16020	14.9	633	0.2	0.00627024
1890	2475.5	10918	7.8	333	0.2	0.00329856
1891	2475.8	9985	7.7	326	0.2	0.00322922
1892	2476.1	12910	10.2	435	0.2	0.00430893
1893	2476.4	8050	3.2	136	0.3	0.00134716
1894	2477.3	12349	5.7	242	0.2	0.00239715
1895	2477.9	12227	5.3	224	0.2	0.00221885
1896	2478.3	15031	10	423	0.2	0.00419007
1897	2478.7	16512	5.5	234	0.2	0.00231791
1898	2479.3	12214	7.1	302	0.2	0.00299149
1899	2479.6	9443	1.4	59	0.3	0.00058443
1900	2479.9	10972	1.3	56	0.2	0.000554713
1901	2480.3	16573	6.4	271	0.1	0.00268442
1902	2480.7	12119	5.1	216	0.2	0.00213961
1903	2481	10843	2.7	113	0.2	0.00111933
1904	2481.3	11207	5.2	220	0.2	0.00217923
1905	2481.7	7671	3.1	130	0.3	0.00128773
1906	2482.2	20450	63.8	2710	0.1	0.0268442
1907	2482.5	17348	6.7	285	0.1	0.00282309
1908	2482.8	15127	4	170	0.2	0.00168395
1909	2483.2	20185	93	3950	0.1	0.0391271
1910	2483.6	9466	6.6	282	0.3	0.00279338
1911	2483.8	13612	11.8	499	0.2	0.00494289
1912	2484.2	18384	77	3273	0.1	0.032421
1913	2484.5	10592	10.8	460	0.2	0.00455657
1914	2484.9	9101	13.4	570	0.3	0.00564619
1915	2485.2	15716	60.4	2567	0.2	0.0254277
1916	2485.6	6214	11.7	496	0.4	0.00491318
1917	2485.9	8691	12.3	524	0.3	0.00519053
1918	2486.2	12986	61.7	2619	0.2	0.0259428
1919	2486.8	6019	10.2	433	0.4	0.00428912
1920	2487.2	13961	53.1	2256	0.2	0.022347
1921	2487.8	5528	8.7	370	0.4	0.00366507
1922	2488.2	12535	38.6	1639	0.2	0.0162353
1923	2488.7	6637	8.7	371	0.4	0.00367498
1924	2489.2	12938	27.8	1180	0.2	0.0116886
1925	2489.8	7211	9.4	398	0.3	0.00394243
1926	2490.2	10147	18.9	803	0.2	0.00795419
1927	2490.6	8302	5.5	235	0.3	0.00232781
1928	2490.8	9175	5.7	242	0.3	0.00239715
1929	2491.2	17291	93.2	3957	0.1	0.0391964
1930	2491.6	7710	6.6	282	0.3	0.00279338
1931	2492.2	16882	101.3	4302	0.1	0.0426139
1932	2492.7	7644	11.1	471	0.3	0.00466554
1933	2493.2	17309	91.2	3873	0.1	0.0383644
1934	2493.8	8806	16.3	692	0.3	0.00685467
1935	2494.2	16584	63	2678	0.2	0.0265272
1936	2494.8	5252	20.1	852	0.5	0.00843957
1937	2495.2	11072	44.7	1898	0.2	0.0188008
1938	2495.8	7131	26.1	1108	0.3	0.0109754
1939	2496.2	4258	33	1402	0.6	0.0138876
1940	2497.2	4994	54.9	2331	0.5	0.0230899
1941	2497.5	9082	52	2211	0.3	0.0219013
1942	2498.2	5551	114.6	4867	0.4	0.0482105
1943	2499.1	10523	274.6	11663	0.2	0.115529
1944	2499.6	12671	256.1	10877	0.2	0.107743
1945	2500.2	23693	119999	5096767	0.1	50.4865
1946	2500.7	20972	361.8	15367	0.1	0.152219
1947	2501.2	25760	237686	10095304	0.1	100
1948	2501.7	22039	285.9	12144	0.1	0.120294
1949	2502.2	26301	155573	6607687	0.1	65.4531
1950	2502.7	21025	277.5	11788	0.1	0.116767
1951	2503.2	26636	83729.5	3556269	0.1	35.227
1952	2503.7	17328	309.8	13157	0.1	0.130328
1953	2504.2	26010	39781.1	1689637	0.1	16.7369
1954	2504.7	18318	175.6	7457	0.1	0.073866
1955	2505.2	25674	15526.2	659450	0.1	6.53225
1956	2505.7	13202	186	7901	0.2	0.0782641
1957	2506.2	24785	5304.9	225317	0.1	2.2319
1958	2506.7	9077	93.6	3974	0.3	0.0393648
1959	2507.2	23889	1497.7	63611	0.1	0.630105
1960	2507.7	9470	77	3269	0.3	0.0323814
1961	2508.2	19377	406.1	17250	0.1	0.170872
1962	2508.6	8610	56.8	2413	0.3	0.0239022
1963	2509.2	15628	116.5	4949	0.2	0.0490228
1964	2509.7	4768	34.2	1455	0.5	0.0144126
1965	2510.2	9970	45.1	1918	0.3	0.0189989
1966	2510.5	6908	25.3	1074	0.4	0.0106386
1967	2511.1	5613	22	933	0.4	0.00924192
1968	2511.7	9396	19.6	835	0.3	0.00827117
1969	2512.2	8949	30.7	1302	0.3	0.0128971
1970	2512.7	7378	25.7	1091	0.3	0.010807
1971	2513.1	9829	37	1571	0.3	0.0155617
1972	2513.5	10054	16.1	685	0.3	0.00678533
1973	2513.7	11273	25.7	1089	0.2	0.0107872
1974	2514.2	21484	275.3	11694	0.1	0.115836
1975	2514.7	9143	15.8	671	0.3	0.00664665
1976	2515.2	25161	415.3	17639	0.1	0.174725
1977	2515.7	12924	11.8	501	0.2	0.0049627
1978	2516.2	23490	566.3	24053	0.1	0.238259
1979	2516.7	16347	10.4	440	0.2	0.00435846
1980	2517.2	25304	607.8	25816	0.1	0.255723
1981	2517.7	13919	7.6	325	0.2	0.00321932
1982	2518.2	22942	372.8	15835	0.1	0.156855
1983	2518.7	13384	5.5	235	0.2	0.00232781
1984	2519.2	24880	219.7	9333	0.1	0.0924489
1985	2519.7	11535	8.2	347	0.2	0.00343724
1986	2520.2	20397	116.5	4947	0.1	0.049003
1987	2520.7	10679	8.5	360	0.2	0.00356601
1988	2521.2	19397	62.1	2638	0.1	0.026131
1989	2521.7	13808	8.5	360	0.2	0.00356601
1990	2522.2	24596	5808	246686	0.1	2.44357
1991	2522.7	19776	31.4	1332	0.1	0.0131943
1992	2523.2	24628	8015.5	340445	0.1	3.37231
1993	2523.7	19696	32.7	1388	0.1	0.013749
1994	2524.2	25151	6251.2	265510	0.1	2.63003
1995	2524.7	20179	28.4	1208	0.1	0.011966
1996	2525.2	24568	3298	140077	0.1	1.38755
1997	2525.7	18513	21.2	899	0.1	0.00890513
1998	2526.2	23894	1362.1	57852	0.1	0.573059
1999	2526.7	19215	30.5	1296	0.1	0.0128377
2000	2527.2	23368	664.3	28216	0.1	0.279496
2001	2527.7	22899	57.6	2448	0.1	0.0242489
2002	2528.2	23538	451.1	19161	0.1	0.189801
2003	2528.7	22644	56	2380	0.1	0.0235753
2004	2529.2	23662	298.5	12679	0.1	0.125593
2005	2529.7	22814	38.6	1639	0.1	0.0162353
2006	2530.2	23468	177.9	7555	0.1	0.0748368
2007	2530.7	19748	17.8	754	0.1	0.00746882
2008	2531.2	22729	111.8	4748	0.1	0.0470318
2009	2531.7	18191	16.7	711	0.1	0.00704288
2010	2532.2	25741	855.2	36324	0.1	0.359811
2011	2532.7	19661	16.1	683	0.1	0.00676552
2012	2533.2	25476	1127.4	47886	0.1	0.474339
2013	2533.7	19934	7.9	336	0.1	0.00332828
2014	2534.2	24985	828.5	35190	0.1	0.348578
2015	2534.7	17936	7	297	0.1	0.00294196
2016	2535.2	23942	437.8	18595	0.1	0.184195
2017	2535.7	16221	8.2	347	0.2	0.00343724
2018	2536.2	24067	195.8	8318	0.1	0.0823947
2019	2536.7	9035	3.9	164	0.3	0.00162452
2020	2537.2	22240	83	3524	0.1	0.0349073
2021	2537.6	10550	3.9	164	0.2	0.00162452
2022	2538.1	24592	391.5	16628	0.1	0.16471
2023	2538.6	20757	7.8	330	0.1	0.00326885
2024	2539.1	25119	521.7	22157	0.1	0.219478
2025	2539.7	18608	10.5	448	0.1	0.00443771
2026	2540.1	24799	409	17370	0.1	0.17206
2027	2540.7	15281	14.5	614	0.2	0.00608204
2028	2541.2	19634	262.6	11156	0.1	0.110507
2029	2541.6	7618	40.3	1713	0.3	0.0169683
2030	2542.2	19653	269.5	11448	0.1	0.113399
2031	2542.7	7853	14.8	627	0.3	0.00621081
2032	2543.2	20621	214.2	9099	0.1	0.090131
2033	2543.7	9682	36.7	1557	0.3	0.015423
2034	2544.2	22929	553.2	23497	0.1	0.232752
2035	2544.6	12441	26.8	1140	0.2	0.0112924
2036	2545.2	22827	626.2	26595	0.1	0.263439
2037	2545.7	11586	30	1273	0.2	0.0126098
2038	2546.2	21957	506.3	21504	0.1	0.21301
2039	2546.6	10952	43.7	1857	0.2	0.0183947
2040	2547.1	23620	418.2	17761	0.1	0.175933
2041	2547.7	12227	18.3	777	0.2	0.00769665
2042	2548.1	22442	152.7	6485	0.1	0.0642378
2043	2548.6	12057	17.6	749	0.2	0.00741929
2044	2549.1	21684	215.2	9142	0.1	0.090557
2045	2549.6	10863	15.4	653	0.2	0.00646835
2046	2550.1	22446	151.5	6436	0.1	0.0637524
2047	2550.7	14337	12.9	546	0.2	0.00540846
2048	2551.1	22860	223.4	9488	0.1	0.0939843
2049	2551.7	16137	10	423	0.2	0.00419007
2050	2552.1	22850	181.7	7716	0.1	0.0764316
2051	2552.6	14849	10.7	453	0.2	0.00448723
2052	2553.1	24734	1291.8	54866	0.1	0.54348
2053	2553.6	17910	17.8	757	0.1	0.00749854
2054	2554.1	24940	1799.9	76448	0.1	0.757263
2055	2554.6	20802	15.1	640	0.1	0.00633958
2056	2555.1	24385	1375.5	58424	0.1	0.578725
2057	2555.6	18679	16.7	709	0.1	0.00702307
2058	2556.1	23646	1279.6	54349	0.1	0.538359
2059	2556.6	20207	10.4	441	0.1	0.00436837
2060	2557.1	24911	1140.9	48459	0.1	0.480015
2061	2557.6	20091	20.7	877	0.1	0.00868721
2062	2558.1	23670	816.5	34680	0.1	0.343526
2063	2558.6	19731	15.8	669	0.1	0.00662684
2064	2559.1	24735	622.9	26455	0.1	0.262053
2065	2559.6	16445	10.2	432	0.2	0.00427922
2066	2560.1	23320	420.1	17842	0.1	0.176736
2067	2560.6	16280	6.1	260	0.2	0.00257545
2068	2561.1	24232	290.2	12327	0.1	0.122106
2069	2561.6	16139	14.3	608	0.2	0.0060226
2070	2562.1	23117	194.6	8266	0.1	0.0818797
2071	2562.6	16320	19.5	830	0.2	0.00822164
2072	2563.1	22888	137.6	5845	0.1	0.0578982
2073	2563.6	14739	9.5	402	0.2	0.00398205
2074	2564.1	22495	131.4	5583	0.1	0.0553029
2075	2564.7	11458	7.2	305	0.2	0.00302121
2076	2565.1	17935	100.5	4268	0.1	0.0422771
2077	2565.6	15599	6	253	0.2	0.00250612
2078	2566.1	23902	123.3	5237	0.1	0.0518756
2079	2566.6	17579	4.6	194	0.1	0.00192169
2080	2567.1	20788	124.9	5304	0.1	0.0525393
2081	2567.6	11353	5.8	248	0.2	0.00245659
2082	2568.1	18897	72.2	3067	0.1	0.0303805
2083	2568.6	11064	4.7	200	0.2	0.00198112
2084	2569.1	17759	46.4	1970	0.1	0.019514
2085	2569.7	10471	2.5	104	0.2	0.00103018
2086	2570.1	19866	35.6	1512	0.1	0.0149773
2087	2570.7	20515	61.5	2612	0.1	0.0258734
2088	2571.2	19401	44.3	1881	0.1	0.0186324
2089	2571.6	15321	6.7	287	0.2	0.00284291
2090	2572.2	19962	89.3	3793	0.1	0.0375719
2091	2572.7	19649	9.2	392	0.1	0.00388299
2092	2573.2	18444	48.4	2056	0.1	0.0203659
2093	2573.7	22917	150	6371	0.1	0.0631086
2094	2574.2	18887	38	1616	0.1	0.0160074
2095	2574.6	18678	8.2	349	0.1	0.00345705
2096	2575.2	20637	161.8	6871	0.1	0.0680613
2097	2575.6	20959	15.7	668	0.1	0.00661694
2098	2576.1	21939	107	4544	0.1	0.045011
2099	2576.7	21564	83.3	3540	0.1	0.0350658
2100	2577.1	21725	94.5	4015	0.1	0.039771
2101	2577.6	16408	25.5	1081	0.2	0.0107079
2102	2578.1	21533	107.6	4571	0.1	0.0452785
2103	2578.6	17723	12.3	523	0.1	0.00518063
2104	2579.1	22515	83.7	3554	0.1	0.0352045
2105	2579.7	18436	28	1190	0.1	0.0117877
2106	2580.1	22328	83.4	3541	0.1	0.0350757
2107	2580.6	12778	8.2	350	0.2	0.00346696
2108	2581.1	21606	67.4	2862	0.1	0.0283498
2109	2581.6	14108	6.2	264	0.2	0.00261508
2110	2582.1	24739	123.8	5259	0.1	0.0520935
2111	2582.7	14144	11.6	491	0.2	0.00486365
2112	2583.1	22336	146.8	6236	0.1	0.0617713
2113	2583.6	14936	8.2	347	0.2	0.00343724
2114	2584.1	22437	116.4	4945	0.1	0.0489832
2115	2584.6	17207	4.9	210	0.2	0.00208018
2116	2585.1	22343	74.8	3179	0.1	0.0314899
2117	2585.6	9966	7.4	313	0.3	0.00310045
2118	2586.1	21654	52	2209	0.1	0.0218815
2119	2586.6	11802	3.7	157	0.2	0.00155518
2120	2587.1	20403	42.2	1792	0.1	0.0177508
2121	2587.6	17626	8.6	366	0.1	0.00362545
2122	2588.1	21386	47.4	2014	0.1	0.0199499
2123	2588.6	19559	9.9	422	0.1	0.00418016
2124	2589.1	22723	113.2	4809	0.1	0.047636
2125	2589.6	18224	8.7	368	0.1	0.00364526
2126	2590.1	24212	134.9	5729	0.1	0.0567492
2127	2590.6	19979	6.2	262	0.1	0.00259527
2128	2591.1	23656	128.2	5445	0.1	0.053936
2129	2591.6	17702	9.2	392	0.1	0.00388299
2130	2592.1	23616	103.1	4380	0.1	0.0433865
2131	2592.6	14802	4.5	192	0.2	0.00190187
2132	2593.1	20938	63	2678	0.1	0.0265272
2133	2593.6	14437	7.4	313	0.2	0.00310045
2134	2594.1	20978	46.6	1981	0.1	0.019623
2135	2594.6	14207	9.9	422	0.2	0.00418016
2136	2595.1	20484	41.7	1769	0.1	0.017523
2137	2595.6	8723	4.7	201	0.3	0.00199102
2138	2596.1	17271	32.5	1382	0.2	0.0136895
2139	2596.6	5567	3.1	132	0.5	0.00130754
2140	2597.2	16607	72.8	3093	0.2	0.030638
2141	2597.6	17456	8.9	377	0.1	0.00373441
2142	2598.2	23321	310.1	13169	0.1	0.130447
2143	2598.6	19512	12.7	538	0.1	0.00532921
2144	2599.2	23343	290	12317	0.1	0.122007
2145	2599.6	18710	26.1	1109	0.1	0.0109853
2146	2600.2	23734	245.3	10418	0.1	0.103196
2147	2600.6	20534	24.8	1053	0.1	0.0104306
2148	2601.1	22541	110.1	4675	0.1	0.0463087
2149	2601.6	20462	12.5	532	0.1	0.00526978
2150	2602.1	23643	85.9	3649	0.1	0.0361455
2151	2602.6	20194	7.5	318	0.1	0.00314998
2152	2603.1	23979	67.2	2853	0.1	0.0282607
2153	2603.6	16909	11.9	506	0.2	0.00501223
2154	2604.1	20205	56.2	2388	0.1	0.0236546
2155	2604.6	17016	11.3	479	0.2	0.00474478
2156	2605.1	21673	54.4	2312	0.1	0.0229017
2157	2605.6	19850	10.2	435	0.1	0.00430893
2158	2606.1	20292	46.8	1987	0.1	0.0196824
2159	2606.6	17681	11	468	0.1	0.00463582
2160	2607.1	17977	37.6	1596	0.1	0.0158093
2161	2607.6	16975	8.3	351	0.2	0.00347686
2162	2608.1	15629	26.2	1111	0.2	0.0110051
2163	2608.6	14804	4.5	191	0.2	0.00189197
2164	2609.1	18710	28	1189	0.1	0.0117778
2165	2609.6	17580	12.1	514	0.1	0.00509148
2166	2610.1	18481	32	1359	0.1	0.0134617
2167	2610.6	19184	8	339	0.1	0.003358
2168	2611.1	18801	45.5	1932	0.1	0.0191376
2169	2611.6	16395	7.1	301	0.2	0.00298158
2170	2612.1	17714	40.1	1703	0.1	0.0168692
2171	2612.6	12651	5.7	242	0.2	0.00239715
2172	2613.1	16464	38.3	1625	0.2	0.0160966
2173	2613.6	15960	8.4	355	0.2	0.00351649
2174	2614.1	19250	35.4	1503	0.1	0.0148881
2175	2614.6	11763	3.3	138	0.2	0.00136697
2176	2615.1	16790	29.7	1260	0.2	0.0124811
2177	2615.6	17799	8.9	378	0.1	0.00374432
2178	2616.1	16137	24.3	1030	0.2	0.0102028
2179	2616.6	20017	10.3	436	0.1	0.00431884
2180	2617.1	16652	23.4	993	0.2	0.00983626
2181	2617.6	11174	2.1	89	0.2	0.000881598
2182	2618.1	18303	19.3	819	0.1	0.00811268
2183	2618.6	14752	4.8	205	0.2	0.00203065
2184	2619.1	13928	14.8	630	0.2	0.00624053
2185	2619.6	13926	5	213	0.2	0.00210989
2186	2620.1	23314	60.2	2558	0.1	0.0253385
2187	2620.6	17008	4.4	186	0.2	0.00184244
2188	2621.1	24246	68.3	2899	0.1	0.0287163
2189	2621.6	20040	15.9	674	0.1	0.00667637
2190	2622.1	21869	111.5	4738	0.1	0.0469327
2191	2622.6	20936	12.4	526	0.1	0.00521034
2192	2623.1	21782	122.6	5208	0.1	0.0515883
2193	2623.6	17267	10.9	462	0.2	0.00457639
2194	2624.1	23095	124.7	5295	0.1	0.0524501
2195	2624.6	18529	6.9	292	0.1	0.00289243
2196	2625.1	22876	101.4	4305	0.1	0.0426436
2197	2625.6	15810	7.9	335	0.2	0.00331837
2198	2626.1	22470	82.6	3506	0.1	0.034729
2199	2626.6	17334	4.7	202	0.2	0.00200093
2200	2627.1	19615	57.6	2448	0.1	0.0242489
2201	2627.6	19465	8.1	344	0.1	0.00340752
2202	2628.1	21970	69.2	2939	0.1	0.0291125
2203	2628.6	11648	5.7	241	0.2	0.00238725
2204	2629.2	105167	34.8	1478	0	0.0146405
2205	2629.7	16185	5.1	215	0.2	0.0021297
2206	2630.1	14953	46	1953	0.2	0.0193456
2207	2630.6	14798	9.2	392	0.2	0.00388299
2208	2631.2	13981	45.9	1950	0.2	0.0193159
2209	2631.7	10976	3.4	144	0.2	0.00142641
2210	2632.1	13078	30.4	1291	0.2	0.0127881
2211	2632.7	16277	7.4	313	0.2	0.00310045
2212	2633.1	10999	25.5	1083	0.2	0.0107278
2213	2633.6	14050	12.3	524	0.2	0.00519053
2214	2634.1	15377	20.7	878	0.2	0.00869711
2215	2634.6	10762	3.7	157	0.2	0.00155518
2216	2635.1	18689	25.9	1098	0.1	0.0108763
2217	2635.6	10669	3.5	151	0.2	0.00149574
2218	2636.1	17826	45.1	1918	0.1	0.0189989
2219	2636.6	17419	8.2	350	0.2	0.00346696
2220	2637.1	21318	59.3	2520	0.1	0.0249621
2221	2637.6	19919	11.2	474	0.1	0.00469525
2222	2638.1	22209	57.3	2433	0.1	0.0241003
2223	2638.6	17107	8.7	371	0.2	0.00367498
2224	2639.1	22645	41.4	1758	0.1	0.017414
2225	2639.6	12646	5.6	238	0.2	0.00235753
2226	2639.8	12720	5	211	0.2	0.00209008
2227	2640.1	19045	34.1	1447	0.1	0.0143334
2228	2640.6	7511	3.4	146	0.4	0.00144622
2229	2641.1	14257	13.6	578	0.2	0.00572543
2230	2641.6	12496	5	211	0.2	0.00209008
2231	2642.3	24360	274.1	11642	0.1	0.115321
2232	2642.8	14371	7.1	302	0.2	0.00299149
2233	2643.3	25431	389.9	16560	0.1	0.164037
2234	2643.8	17504	7.9	337	0.2	0.00333819
2235	2644.3	24984	295.5	12553	0.1	0.124345
2236	2644.8	18847	4.6	194	0.1	0.00192169
2237	2645.3	22157	164.9	7006	0.1	0.0693986
2238	2645.7	16544	4.9	208	0.2	0.00206036
2239	2646	17999	11.3	479	0.1	0.00474478
2240	2646.3	22297	70.3	2986	0.1	0.0295781
2241	2647.4	7306	167.9	7131	0.4	0.0706368
2242	2647.8	11153	36.3	1540	0.2	0.0152546
2243	2648	6276	45.4	1930	0.4	0.0191178
2244	2648.7	6696	19.6	833	0.4	0.00825136
2245	2649.1	11850	32.6	1384	0.2	0.0137093
2246	2649.5	5825	19.9	847	0.5	0.00839004
2247	2650	12181	30.8	1310	0.2	0.0129763
2248	2650.3	7025	10.9	463	0.4	0.00458629
2249	2650.6	10961	8.2	350	0.2	0.00346696
2250	2651.1	21142	54.4	2310	0.1	0.0228819
2251	2651.4	11833	5.6	238	0.2	0.00235753
2252	2651.6	10377	5.7	240	0.3	0.00237734
2253	2652.1	22045	62.6	2658	0.1	0.0263291
2254	2652.5	12563	3.7	159	0.2	0.00157499
2255	2652.6	12227	4.3	181	0.2	0.00179291
2256	2653.1	22372	54.1	2297	0.1	0.0227532
2257	2653.5	8472	2.6	109	0.3	0.00107971
2258	2654.1	23337	40.2	1709	0.1	0.0169287
2259	2654.6	8299	3.8	161	0.3	0.0015948
2260	2655.1	20235	26.4	1120	0.1	0.0110943
2261	2655.5	8515	2.4	102	0.3	0.00101037
2262	2656.2	18548	51.5	2186	0.1	0.0216536
2263	2656.7	18159	3.2	136	0.1	0.00134716
2264	2657.1	22213	25.2	1070	0.1	0.010599
2265	2657.4	14809	3.5	149	0.2	0.00147593
2266	2657.7	16350	2.4	101	0.2	0.00100047
2267	2658.1	20092	20.3	861	0.1	0.00852872
2268	2658.4	12430	2.9	125	0.2	0.0012382
2269	2658.7	15102	1.3	54	0.2	0.000534902
2270	2659.1	17295	10	423	0.2	0.00419007
2271	2659.3	22645	29.4	1248	0.1	0.0123622
2272	2659.7	18754	3.7	157	0.1	0.00155518
2273	2660.1	20146	16.6	704	0.1	0.00697354
2274	2660.6	8962	2.7	113	0.3	0.00111933
2275	2661.1	19374	13.4	571	0.1	0.0056561
2276	2661.4	11143	2.5	108	0.2	0.0010698
2277	2661.6	11590	3.9	166	0.2	0.00164433
2278	2662.1	11759	6.7	286	0.2	0.002833
2279	2662.3	16359	11.5	489	0.2	0.00484384
2280	2662.7	8547	2	83	0.3	0.000822164
2281	2663.1	16184	8.6	365	0.2	0.00361554
2282	2663.3	13302	4.5	193	0.2	0.00191178
2283	2663.7	13641	3.4	144	0.2	0.00142641
2284	2664.2	9250	9.5	404	0.3	0.00400186
2285	2664.7	15379	4	169	0.2	0.00167405
2286	2665.2	15378	16.9	718	0.2	0.00711222
2287	2665.7	13503	1.9	81	0.2	0.000802353
2288	2666.2	12639	12.5	533	0.2	0.00527968
2289	2666.6	16654	2.3	99	0.2	0.000980654
2290	2667.1	10290	10.6	449	0.3	0.00444761
2291	2667.6	15364	2.6	109	0.2	0.00107971
2292	2668.1	14667	8.8	374	0.2	0.00370469
2293	2668.7	14626	1.9	81	0.2	0.000802353
2294	2669.1	12293	7.6	321	0.2	0.0031797
2295	2669.6	12343	3.1	130	0.2	0.00128773
2296	2670	14993	6.3	266	0.2	0.00263489
2297	2670.3	11495	4.4	186	0.2	0.00184244
2298	2670.6	13065	2.4	101	0.2	0.00100047
2299	2671	13246	4.6	196	0.2	0.0019415
2300	2671.3	15442	5.4	228	0.2	0.00225848
2301	2672.1	13065	6.8	290	0.2	0.00287262
2302	2672.6	6493	2.8	121	0.4	0.00119858
2303	2673.1	14361	11.8	501	0.2	0.0049627
2304	2673.6	18292	7.3	310	0.1	0.00307073
2305	2674.1	16923	15.3	650	0.2	0.00643864
2306	2675.1	15458	19.8	841	0.2	0.00833061
2307	2675.6	12238	4.1	176	0.2	0.00174338
2308	2676.1	16465	13.3	566	0.2	0.00560657
2309	2676.4	6272	2.4	104	0.4	0.00103018
2310	2677	17441	10.9	464	0.2	0.0045962
2311	2677.3	14141	4.1	172	0.2	0.00170376
2312	2677.6	13517	1.1	47	0.2	0.000465563
2313	2678.2	22032	35	1488	0.1	0.0147395
2314	2678.7	17695	2.3	98	0.2	0.000970748
2315	2679	18709	5	210	0.1	0.00208018
2316	2679.2	22401	48.1	2043	0.1	0.0202371
2317	2679.6	16851	2.4	104	0.2	0.00103018
2318	2680.2	21973	39.6	1683	0.1	0.0166711
2319	2680.6	18435	1.6	67	0.1	0.000663675
2320	2681.2	21045	21.9	930	0.1	0.0092122
2321	2681.7	14212	3.3	139	0.2	0.00137688
2322	2682	13893	8.2	346	0.2	0.00342734
2323	2682.2	18035	11.8	499	0.1	0.00494289
2324	2682.6	17390	2.8	119	0.2	0.00117877
2325	2683	15425	4.2	180	0.2	0.00178301
2326	2683.2	20867	28.1	1193	0.1	0.0118174
2327	2683.6	20334	2.7	115	0.1	0.00113914
2328	2684.2	23394	41.1	1745	0.1	0.0172853
2329	2684.9	9826	2	86	0.3	0.000851881
2330	2685.2	22729	33.5	1422	0.1	0.0140858
2331	2685.7	14067	2.1	90	0.2	0.000891504
2332	2686.2	18913	19.4	823	0.1	0.00815231
2333	2686.7	17998	3.3	141	0.1	0.00139669
2334	2687.2	13350	10.9	463	0.2	0.00458629
2335	2687.7	16200	4.3	181	0.2	0.00179291
2336	2688.1	10819	7.2	305	0.2	0.00302121
2337	2688.6	13352	2.7	115	0.2	0.00113914
2338	2689	15796	9.7	410	0.2	0.00406129
2339	2689.2	12302	5.1	215	0.2	0.0021297
2340	2689.6	18880	2.3	96	0.1	0.000950937
2341	2690	19549	12.4	528	0.1	0.00523015
2342	2690.6	12000	4.2	179	0.2	0.0017731
2343	2691	17540	10.6	452	0.2	0.00447733
2344	2691.4	13596	2.9	122	0.2	0.00120848
2345	2692	11869	6.9	294	0.2	0.00291225
2346	2692.2	11568	5.8	247	0.2	0.00244668
2347	2692.6	15037	2.3	96	0.2	0.000950937
2348	2693.1	14295	15.1	639	0.2	0.00632968
2349	2693.6	11254	2.2	95	0.2	0.000941032
2350	2694.2	15515	10	425	0.2	0.00420988
2351	2694.6	17019	2.4	101	0.2	0.00100047
2352	2695.1	14455	6.3	269	0.2	0.00266461
2353	2695.2	13077	7.7	329	0.2	0.00325894
2354	2695.7	14448	1.9	80	0.2	0.000792448
2355	2696.1	13031	7.8	333	0.2	0.00329856
2356	2696.3	12950	6.9	291	0.2	0.00288253
2357	2696.7	9121	1.6	69	0.3	0.000683486
2358	2697.1	10853	7.2	307	0.2	0.00304102
2359	2697.7	12870	1.6	66	0.2	0.000653769
2360	2698.1	16328	8	341	0.2	0.00337781
2361	2698.7	17526	2.3	99	0.2	0.000980654
2362	2699.1	16316	9.5	402	0.2	0.00398205
2363	2699.6	15778	3.2	138	0.2	0.00136697
2364	2700.1	8230	6.2	264	0.3	0.00261508
2365	2700.6	13317	2.2	95	0.2	0.000941032
2366	2701.2	12643	11.1	470	0.2	0.00465563
2367	2701.7	15650	1.7	71	0.2	0.000703297
2368	2702.2	13057	8	341	0.2	0.00337781
2369	2702.6	13167	2.4	103	0.2	0.00102028
2370	2703.1	11107	7.3	309	0.2	0.00306083
2371	2703.6	12204	2.8	117	0.2	0.00115895
2372	2704	16789	10	424	0.2	0.00419997
2373	2704.3	16351	6.8	288	0.2	0.00285281
2374	2704.7	19191	2.6	112	0.1	0.00110943
2375	2705	20118	14.3	607	0.1	0.0060127
2376	2705.3	13953	4	172	0.2	0.00170376
2377	2705.6	9245	1.6	66	0.3	0.000653769
2378	2706	19085	10.8	459	0.1	0.00454667
2379	2706.3	18064	8.1	344	0.1	0.00340752
2380	2707	19235	11.5	488	0.1	0.00483393
2381	2707.3	21280	12.7	537	0.1	0.0053193
2382	2707.7	20014	1.1	49	0.1	0.000485374
2383	2708	19651	10.4	443	0.1	0.00438818
2384	2708.3	20652	10.1	431	0.1	0.00426931
2385	2708.7	16365	3.9	164	0.2	0.00162452
2386	2709	18082	13.1	556	0.1	0.00550751
2387	2709.4	18572	7.8	331	0.1	0.00327875
2388	2709.6	15652	2.3	99	0.2	0.000980654
2389	2710	21124	10.2	435	0.1	0.00430893
2390	2710.3	19012	10.2	434	0.1	0.00429903
2391	2710.7	13443	0.4	19	0.2	0.000188206
2392	2711	20515	10.6	450	0.1	0.00445752
2393	2711.3	16499	9.9	419	0.2	0.00415044
2394	2711.6	18575	2	86	0.1	0.000851881
2395	2712	17998	8.4	355	0.2	0.00351649
2396	2712.3	16012	9.5	404	0.2	0.00400186
2397	2713	19899	8.2	348	0.1	0.00344715
2398	2713.3	19701	9.8	415	0.1	0.00411082
2399	2713.7	19439	1.3	54	0.1	0.000534902
2400	2714	22662	7	298	0.1	0.00295187
2401	2714.3	25886	38.5	1636	0.1	0.0162056
2402	2715	20556	6.1	258	0.1	0.00255564
2403	2715.3	24135	53.1	2255	0.1	0.0223371
2404	2716	20680	6.7	285	0.1	0.00282309
2405	2716.3	22636	37.8	1605	0.1	0.0158985
2406	2717	18902	7	298	0.1	0.00295187
2407	2717.3	22498	26.4	1121	0.1	0.0111042
2408	2718	17237	6.6	282	0.2	0.00279338
2409	2718.3	23866	14.1	601	0.1	0.00595326
2410	2718.7	21995	2.4	102	0.1	0.00101037
2411	2719	21180	7.2	306	0.1	0.00303111
2412	2719.3	18051	7.9	335	0.2	0.00331837
2413	2719.6	14958	1.4	59	0.2	0.00058443
2414	2720	21655	13.8	584	0.1	0.00578487
2415	2720.3	17676	3.9	167	0.2	0.00165423
2416	2720.6	14714	2	83	0.2	0.000822164
2417	2721	18904	11.2	476	0.1	0.00471506
2418	2721.3	15790	3.9	166	0.2	0.00164433
2419	2721.6	14393	2.6	112	0.2	0.00110943
2420	2722.1	14055	8.3	353	0.2	0.00349668
2421	2722.7	15175	6.8	287	0.2	0.00284291
2422	2723.1	11951	10.8	458	0.2	0.00453676
2423	2723.5	8423	5.9	252	0.3	0.00249621
2424	2724	13988	9.9	421	0.2	0.00417026
2425	2724.4	10258	5.4	227	0.3	0.00224857
2426	2725	8251	5.8	247	0.3	0.00244668
2427	2725.3	16600	8.1	343	0.2	0.00339762
2428	2725.6	13023	1.1	48	0.2	0.000475469
2429	2726	11912	5.8	247	0.2	0.00244668
2430	2726.3	9312	4.5	190	0.3	0.00188206
2431	2726.6	9466	4.1	175	0.3	0.00173348
2432	2727	11659	8.4	355	0.2	0.00351649
2433	2727.3	10256	6.4	271	0.3	0.00268442
2434	2728	15977	7.6	322	0.2	0.0031896
2435	2728.3	14075	9.9	420	0.2	0.00416035
2436	2729	15563	7.5	318	0.2	0.00314998
2437	2729.3	17457	7.3	309	0.2	0.00306083
2438	2729.6	17392	2.8	120	0.2	0.00118867
2439	2730	20162	8.5	363	0.1	0.00359573
2440	2730.3	16647	5.8	246	0.2	0.00243678
2441	2731	20712	16.9	719	0.1	0.00712212
2442	2731.4	20213	7	298	0.1	0.00295187
2443	2732.1	22668	23.6	1002	0.1	0.00992541
2444	2732.4	17020	3.5	150	0.2	0.00148584
2445	2732.6	18250	3	127	0.1	0.00125801
2446	2733	20543	21.4	907	0.1	0.00898438
2447	2733.4	18147	4.8	204	0.2	0.00202074
2448	2733.6	18547	2.8	117	0.1	0.00115895
2449	2734	20128	15.9	674	0.1	0.00667637
2450	2734.4	13292	3.5	148	0.2	0.00146603
2451	2735	15802	11.9	507	0.2	0.00502214
2452	2735.3	12062	3.9	166	0.2	0.00164433
2453	2735.6	9983	2.6	109	0.3	0.00107971
2454	2736	16654	8.9	377	0.2	0.00373441
2455	2736.3	19364	8.6	366	0.1	0.00362545
2456	2736.7	17144	2	86	0.2	0.000851881
2457	2737	17833	6.3	266	0.2	0.00263489
2458	2737.3	18202	9.8	417	0.2	0.00413063
2459	2738	12386	4.1	172	0.2	0.00170376
2460	2738.3	19643	21	893	0.1	0.0088457
2461	2738.7	16723	2.6	112	0.2	0.00110943
2462	2739	19477	5.4	230	0.1	0.00227829
2463	2739.3	25589	34.2	1451	0.1	0.014373
2464	2739.7	22253	1.7	71	0.1	0.000703297
2465	2740	20603	9.1	385	0.1	0.00381365
2466	2740.3	23315	27.5	1168	0.1	0.0115697
2467	2741	12993	5.8	246	0.2	0.00243678
2468	2741.3	17966	15	638	0.2	0.00631977
2469	2741.6	22126	1	43	0.1	0.000425941
2470	2742	19378	10.2	431	0.1	0.00426931
2471	2742.3	22167	9.8	415	0.1	0.00411082
2472	2742.7	18837	1.3	55	0.1	0.000544808
2473	2743	15701	8.7	368	0.2	0.00364526
2474	2743.3	16299	8.8	375	0.2	0.0037146
2475	2743.7	15293	2.4	103	0.2	0.00102028
2476	2744	15169	10.1	430	0.2	0.00425941
2477	2744.4	21691	9.2	390	0.1	0.00386318
2478	2745	15793	9.7	411	0.2	0.0040712
2479	2745.4	17866	8.7	371	0.2	0.00367498
2480	2745.7	14510	1	43	0.2	0.000425941
2481	2746.1	13499	6.6	281	0.2	0.00278347
2482	2746.3	16018	6.5	274	0.2	0.00271413
2483	2746.7	11628	1.3	54	0.2	0.000534902
2484	2747	14370	7.1	302	0.2	0.00299149
2485	2747.4	14737	4.9	206	0.2	0.00204055
2486	2747.6	14230	3.9	165	0.2	0.00163442
2487	2748	16027	7.6	321	0.2	0.0031797
2488	2748.4	17000	12.4	528	0.2	0.00523015
2489	2748.7	13584	2.3	99	0.2	0.000980654
2490	2749	20402	9.4	401	0.1	0.00397214
2491	2749.4	19784	15.2	645	0.1	0.00638911
2492	2750	20759	9.9	419	0.1	0.00415044
2493	2750.4	21044	14.3	609	0.1	0.00603251
2494	2751	19657	10.7	453	0.1	0.00448723
2495	2751.4	18597	10.3	437	0.1	0.00432875
2496	2752	19071	10.6	451	0.1	0.00446742
2497	2752.4	19910	11.2	474	0.1	0.00469525
2498	2753	13797	7.3	310	0.2	0.00307073
2499	2753.3	16886	7.1	301	0.2	0.00298158
2500	2754	19828	11.3	482	0.1	0.0047745
2501	2754.4	20459	7.1	303	0.1	0.0030014
2502	2754.7	17247	2	87	0.2	0.000861787
2503	2755	18598	9.4	400	0.1	0.00396224
2504	2755.4	21075	10.7	453	0.1	0.00448723
2505	2756	17340	11.8	500	0.2	0.0049528
2506	2756.4	17780	11.8	502	0.2	0.00497261
2507	2756.6	10487	2.5	108	0.3	0.0010698
2508	2757	13994	8.2	350	0.2	0.00346696
2509	2757.4	14904	10.7	454	0.2	0.00449714
2510	2758.1	8047	30.2	1282	0.3	0.012699
2511	2758.3	5818	45.7	1940	0.5	0.0192169
2512	2758.7	4654	31.2	1325	0.6	0.0131249
2513	2759.3	9344	16.9	718	0.3	0.00711222
2514	2759.9	11113	8.3	353	0.2	0.00349668
2515	2760.3	20369	31.6	1341	0.1	0.0132834
2516	2760.7	12454	5.1	218	0.2	0.00215942
2517	2760.9	16408	10.5	447	0.2	0.0044278
2518	2761.3	21327	47.7	2027	0.1	0.0200786
2519	2762	7974	24.1	1022	0.3	0.0101235
2520	2762.3	11051	78.9	3349	0.2	0.0331738
2521	2762.6	7737	60.7	2580	0.4	0.0255564
2522	2763	14657	94.1	3998	0.2	0.0396026
2523	2763.3	11679	39.4	1675	0.2	0.0165919
2524	2764	8687	11.3	482	0.3	0.0047745
2525	2764.3	14182	18.3	777	0.2	0.00769665
2526	2764.7	7724	13	551	0.4	0.00545798
2527	2765.1	6011	18.2	772	0.5	0.00764712
2528	2766	19902	21.2	899	0.1	0.00890513
2529	2766.4	18177	9.5	404	0.2	0.00400186
2530	2766.7	12500	4	171	0.2	0.00169386
2531	2767	13930	7.8	330	0.2	0.00326885
2532	2767.3	14727	7.5	319	0.2	0.00315989
2533	2768	7909	4.4	188	0.3	0.00186225
2534	2768.3	8185	5.8	247	0.3	0.00244668
2535	2769	12811	6.1	261	0.2	0.00258536
2536	2769.4	13932	6.5	276	0.2	0.00273394
2537	2770	17428	7	296	0.2	0.00293206
2538	2770.4	20019	12.2	517	0.1	0.00512119
2539	2771	17414	6.6	280	0.2	0.00277357
2540	2771.4	26133	92.6	3932	0.1	0.0389488
2541	2772	16941	8.4	358	0.2	0.0035462
2542	2772.4	27257	142.2	6041	0.1	0.0598397
2543	2772.9	18438	6.8	287	0.2	0.00284291
2544	2773.4	22762	176.6	7499	0.1	0.0742821
2545	2774	17373	6.1	259	0.2	0.00256555
2546	2774.4	22037	57.6	2446	0.1	0.0242291
2547	2774.9	18134	6.4	270	0.2	0.00267451
2548	2775.3	23574	87.3	3709	0.1	0.0367399
2549	2776	18645	8.2	348	0.1	0.00344715
2550	2776.4	21479	22.3	947	0.1	0.0093806
2551	2776.9	18100	5.8	248	0.2	0.00245659
2552	2777.3	22948	37.6	1597	0.1	0.0158192
2553	2778	17059	7	298	0.2	0.00295187
2554	2778.3	20016	9.6	410	0.1	0.00406129
2555	2778.6	17797	1.9	80	0.2	0.000792448
2556	2779	20233	6.8	290	0.1	0.00287262
2557	2779.3	20643	19.1	812	0.1	0.00804334
2558	2780	18435	8	341	0.2	0.00337781
2559	2780.4	14029	6.2	263	0.2	0.00260517
2560	2781	15896	9.7	411	0.2	0.0040712
2561	2781.3	19287	9.9	420	0.1	0.00416035
2562	2782	20291	9.8	415	0.1	0.00411082
2563	2782.3	18799	10.3	437	0.1	0.00432875
2564	2783	23335	11.6	494	0.1	0.00489336
2565	2783.3	21149	13.6	576	0.1	0.00570562
2566	2784	23203	34.3	1458	0.1	0.0144424
2567	2784.3	21131	12.4	528	0.1	0.00523015
2568	2785	24761	39.3	1670	0.1	0.0165423
2569	2785.4	19551	13.2	560	0.1	0.00554713
2570	2786	22929	32.6	1384	0.1	0.0137093
2571	2786.3	20871	24.1	1025	0.1	0.0101532
2572	2787	21863	19.4	824	0.1	0.00816221
2573	2787.3	24515	31.6	1342	0.1	0.0132933
2574	2788	22044	15.1	640	0.1	0.00633958
2575	2788.3	20692	28.7	1218	0.1	0.012065
2576	2788.9	17841	8.3	353	0.2	0.00349668
2577	2789.3	22793	22.9	971	0.1	0.00961833
2578	2790	21666	7.5	319	0.1	0.00315989
2579	2790.4	19980	14.3	609	0.1	0.00603251
2580	2790.9	17038	4.6	195	0.2	0.00193159
2581	2791.3	16205	9.2	391	0.2	0.00387309
2582	2792	10159	4.2	179	0.3	0.0017731
2583	2792.3	8987	5.6	239	0.3	0.00236744
2584	2793	17651	6.3	268	0.2	0.0026547
2585	2793.3	12079	8.1	345	0.2	0.00341743
2586	2794	19942	7.8	331	0.1	0.00327875
2587	2794.3	16080	10	424	0.2	0.00419997
2588	2795	18481	7	299	0.2	0.00296177
2589	2795.3	16396	11.4	486	0.2	0.00481412
2590	2795.6	16439	1.1	45	0.2	0.000445752
2591	2796	18399	9.7	410	0.2	0.00406129
2592	2796.3	14500	10.8	459	0.2	0.00454667
2593	2797	19338	7.1	300	0.1	0.00297168
2594	2797.3	15043	10.8	459	0.2	0.00454667
2595	2798	21151	13.1	558	0.1	0.00552732
2596	2798.4	14386	7.8	331	0.2	0.00327875
2597	2799	18586	18.9	803	0.2	0.00795419
2598	2799.4	13008	11.5	487	0.2	0.00482403
2599	2800	16160	17.6	746	0.2	0.00738957
2600	2800.4	17080	17.6	746	0.2	0.00738957
2601	2801	20421	12.4	527	0.1	0.00522025
2602	2801.4	17762	14.6	619	0.2	0.00613156
2603	2802	19549	10.1	429	0.1	0.0042495
2604	2802.4	22480	14.5	614	0.1	0.00608204
2605	2803	14729	14.2	605	0.2	0.00599289
2606	2803.4	16363	21.6	917	0.2	0.00908343
2607	2803.9	14399	10.7	454	0.2	0.00449714
2608	2804.4	17474	15.5	657	0.2	0.00650798
2609	2804.9	14030	8.6	366	0.2	0.00362545
2610	2805.3	16979	14.9	635	0.2	0.00629005
2611	2806	17918	7.7	327	0.2	0.00323913
2612	2806.4	18346	11.5	487	0.2	0.00482403
2613	2807	21730	9	380	0.1	0.00376413
2614	2807.4	16733	8.7	367	0.2	0.00363535
2615	2807.9	18302	9.1	388	0.2	0.00384337
2616	2808.3	18904	10.1	430	0.1	0.00425941
2617	2809	17305	9	381	0.2	0.00377403
2618	2809.3	18596	10.6	450	0.2	0.00445752
2619	2809.9	19355	6.6	282	0.1	0.00279338
2620	2810.4	25740	70.9	3010	0.1	0.0298158
2621	2811	20722	10.8	460	0.1	0.00455657
2622	2811.4	22952	92.3	3919	0.1	0.03882
2623	2812	23636	14.2	604	0.1	0.00598298
2624	2812.4	24259	87.7	3727	0.1	0.0369182
2625	2813	21926	10.4	443	0.1	0.00438818
2626	2813.4	26554	89.1	3783	0.1	0.0374729
2627	2814	19447	8.5	359	0.1	0.00355611
2628	2814.4	25894	31	1317	0.1	0.0130457
2629	2814.7	20924	2.5	106	0.1	0.00104999
2630	2815.4	21247	19.3	822	0.1	0.0081424
2631	2816	22196	13.9	592	0.1	0.00586411
2632	2816.4	19546	12.7	541	0.1	0.00535893
2633	2817	18702	8	338	0.2	0.00334809
2634	2817.4	21493	19.8	841	0.1	0.00833061
2635	2818	20134	8.1	342	0.1	0.00338771
2636	2818.4	20237	1.4	59	0.1	0.00058443
2637	2819	15032	4.7	201	0.2	0.00199102
2638	2819.4	15360	5.8	245	0.2	0.00242687
2639	2820	16404	6.6	279	0.2	0.00276366
2640	2820.4	16065	6.3	269	0.2	0.00266461
2641	2821	21264	6.6	279	0.1	0.00276366
2642	2821.4	20079	8.2	347	0.1	0.00343724
2643	2822	19248	5.5	232	0.1	0.0022981
2644	2822.4	18425	8.2	347	0.2	0.00343724
2645	2822.9	13907	4.5	193	0.2	0.00191178
2646	2823.4	18096	9.1	387	0.2	0.00383347
2647	2823.9	14067	7.6	322	0.2	0.0031896
2648	2824.4	16795	13	552	0.2	0.00546789
2649	2824.9	15119	6	254	0.2	0.00251602
2650	2825.4	15013	11.5	489	0.2	0.00484384
2651	2825.9	11347	7.1	302	0.2	0.00299149
2652	2826.4	16818	17.5	745	0.2	0.00737967
2653	2826.9	11758	4.5	191	0.2	0.00189197
2654	2827.4	17255	14.1	598	0.2	0.00592355
2655	2827.9	17026	4.1	173	0.2	0.00171367
2656	2828.3	14045	11.3	480	0.2	0.00475469
2657	2829	18206	10.7	455	0.2	0.00450705
2658	2829.4	16758	14.9	634	0.2	0.00628015
2659	2830	13953	6.2	264	0.2	0.00261508
2660	2830.4	19666	16.9	719	0.1	0.00712212
2661	2831	19317	6.5	274	0.1	0.00271413
2662	2831.4	19816	18.9	804	0.1	0.0079641
2663	2832	14932	6.3	266	0.2	0.00263489
2664	2832.4	19455	19.3	821	0.1	0.00813249
2665	2832.9	15708	4.5	190	0.2	0.00188206
2666	2833.4	22473	19.2	815	0.1	0.00807306
2667	2834	19483	6.6	280	0.1	0.00277357
2668	2834.4	20714	9.5	402	0.1	0.00398205
2669	2835	18630	7	299	0.2	0.00296177
2670	2835.4	21200	9.1	387	0.1	0.00383347
2671	2836	16093	6.9	291	0.2	0.00288253
2672	2836.4	16132	5.9	250	0.2	0.0024764
2673	2836.9	17081	3.9	166	0.2	0.00164433
2674	2837.9	16743	5.3	226	0.2	0.00223866
2675	2839	16316	4.6	195	0.2	0.00193159
2676	2839.4	18592	7.8	333	0.2	0.00329856
2677	2840	15116	3.7	158	0.2	0.00156508
2678	2840.4	16139	10.3	436	0.2	0.00431884
2679	2841.4	17242	11.6	494	0.2	0.00489336
2680	2842.4	22738	17.4	739	0.1	0.00732024
2681	2842.8	11965	2.9	125	0.2	0.0012382
2682	2843.4	21996	14.1	599	0.1	0.00593345
2683	2844	14821	8.2	348	0.2	0.00344715
2684	2844.4	16720	15	637	0.2	0.00630986
2685	2844.9	15528	8.3	352	0.2	0.00348677
2686	2845.4	20220	17.1	727	0.1	0.00720137
2687	2846	15627	5.6	238	0.2	0.00235753
2688	2846.4	19370	14.3	605	0.1	0.00599289
2689	2846.9	8111	12.8	545	0.4	0.00539855
2690	2847.4	12506	20	850	0.2	0.00841976
2691	2848	9929	5.1	219	0.3	0.00216933
2692	2848.4	18854	14	593	0.2	0.00587402
2693	2848.9	15198	5.1	219	0.2	0.00216933
2694	2849.4	18321	12.7	538	0.2	0.00532921
2695	2850	10709	4.7	201	0.3	0.00199102
2696	2850.4	13581	8.7	370	0.2	0.00366507
2697	2850.9	10324	5.6	239	0.3	0.00236744
2698	2851.4	19386	12.1	516	0.1	0.00511129
2699	2852	15403	5.8	246	0.2	0.00243678
2700	2852.4	15411	7.5	318	0.2	0.00314998
2701	2853	14255	6.7	285	0.2	0.00282309
2702	2853.4	20407	8	338	0.1	0.00334809
2703	2854	19157	9.3	396	0.1	0.00392262
2704	2854.4	18662	10	423	0.2	0.00419007
2705	2855	14405	8.1	345	0.2	0.00341743
2706	2855.4	14464	0.7	28	0.2	0.000277357
2707	2855.9	14648	6.2	265	0.2	0.00262498
2708	2856.3	13734	1.9	80	0.2	0.000792448
2709	2856.9	16925	5.9	249	0.2	0.00246649
2710	2857.4	21215	10.2	433	0.1	0.00428912
2711	2858	18863	5.3	223	0.2	0.00220895
2712	2858.4	18485	10.7	456	0.2	0.00451695
2713	2858.9	15656	1.8	76	0.2	0.000752825
2714	2859.4	16985	8.8	373	0.2	0.00369479
2715	2860	17912	5.2	221	0.2	0.00218914
2716	2860.4	17120	11.6	491	0.2	0.00486365
2717	2861	17180	3.5	148	0.2	0.00146603
2718	2861.4	18191	10	423	0.2	0.00419007
2719	2862	12402	4.6	195	0.2	0.00193159
2720	2862.4	17227	10.2	433	0.2	0.00428912
2721	2862.9	18491	8.2	346	0.2	0.00342734
2722	2863.4	18774	2.6	111	0.2	0.00109952
2723	2863.9	21047	14.8	630	0.1	0.00624053
2724	2864.4	11870	3.1	133	0.2	0.00131744
2725	2864.9	21983	16.6	704	0.1	0.00697354
2726	2865.3	16081	1.8	75	0.2	0.00074292
2727	2865.9	24801	13.5	572	0.1	0.005666
2728	2866.4	18348	7.4	315	0.2	0.00312026
2729	2866.9	19647	9.6	407	0.1	0.00403158
2730	2867.4	19393	7.1	300	0.1	0.00297168
2731	2868.3	19920	9	384	0.1	0.00380375
2732	2868.9	21216	1.9	81	0.1	0.000802353
2733	2869.4	22852	12.2	518	0.1	0.0051311
2734	2870.4	21302	10.6	452	0.1	0.00447733
2735	2870.9	18049	5.7	241	0.2	0.00238725
2736	2871.4	19513	8.7	370	0.1	0.00366507
2737	2871.9	13858	2.8	118	0.2	0.00116886
2738	2872.5	11179	1.9	82	0.3	0.000812259
2739	2872.9	13072	9.4	399	0.2	0.00395233
2740	2873.9	16616	5.3	227	0.2	0.00224857
2741	2874.3	17900	1.1	47	0.2	0.000465563
2742	2875	15267	4	171	0.2	0.00169386
2743	2875.3	13887	4.2	180	0.2	0.00178301
2744	2876	18541	5.2	222	0.2	0.00219904
2745	2876.3	21293	9.9	420	0.1	0.00416035
2746	2877.4	16005	10.6	452	0.2	0.00447733
2747	2878.3	9866	13.2	559	0.3	0.00553723
2748	2879.4	16706	8.2	350	0.2	0.00346696
2749	2879.8	12887	3.5	150	0.2	0.00148584
2750	2880.4	15560	6.2	262	0.2	0.00259527
2751	2880.9	16017	5	211	0.2	0.00209008
2752	2881.7	12507	4.6	197	0.2	0.0019514
2753	2881.9	10085	5.3	226	0.3	0.00223866
2754	2883	17054	10.2	433	0.2	0.00428912
2755	2883.2	11659	3.6	151	0.2	0.00149574
2756	2883.9	16673	9.2	392	0.2	0.00388299
2757	2884.4	16932	9.3	393	0.2	0.0038929
2758	2885	20220	8.5	359	0.1	0.00355611
2759	2885.4	20296	26.6	1131	0.1	0.0112032
2760	2886.4	13419	8.6	366	0.2	0.00362545
2761	2887	15986	8.8	372	0.2	0.00368488
2762	2887.4	18335	13.9	589	0.2	0.0058344
2763	2887.9	10280	63.2	2683	0.3	0.0265767
2764	2888.4	7791	92.1	3914	0.4	0.0387705
2765	2889.4	13748	33.9	1439	0.2	0.0142542
2766	2889.8	7695	13.9	589	0.4	0.0058344
2767	2890.4	13331	6.4	272	0.2	0.00269432
2768	2891	8102	12.5	530	0.4	0.00524997
2769	2891.4	12187	10.4	441	0.2	0.00436837
2770	2892.1	7446	6.5	275	0.4	0.00272404
2771	2892.4	10733	7.1	300	0.3	0.00297168
2772	2893	11506	7.3	310	0.3	0.00307073
2773	2893.4	13131	8	340	0.2	0.0033679
2774	2893.9	9588	6.2	263	0.3	0.00260517
2775	2894.4	14076	8.7	368	0.2	0.00364526
2776	2894.9	10459	3.2	136	0.3	0.00134716
2777	2895.4	6654	4.5	191	0.4	0.00189197
2778	2896	11245	5.6	240	0.3	0.00237734
2779	2896.4	18176	8.5	359	0.2	0.00355611
2780	2897	10178	3.7	156	0.3	0.00154527
2781	2897.4	15501	6.4	273	0.2	0.00270423
2782	2897.9	12031	3.1	133	0.2	0.00131744
2783	2898.4	17483	5.8	247	0.2	0.00244668
2784	2898.9	12340	3.7	158	0.2	0.00156508
2785	2899.4	21869	5.3	226	0.1	0.00223866
2786	2899.9	17426	4.9	210	0.2	0.00208018
2787	2900.4	18271	6.8	289	0.2	0.00286272
2788	2900.9	14054	4.3	183	0.2	0.00181272
2789	2901.4	15113	8.6	365	0.2	0.00361554
2790	2901.9	15439	3.9	166	0.2	0.00164433
2791	2902.4	20682	11.9	507	0.1	0.00502214
2792	2902.9	16779	5.6	238	0.2	0.00235753
2793	2903.4	19146	11.1	472	0.2	0.00467544
2794	2903.9	16659	5.2	222	0.2	0.00219904
2795	2904.4	18772	12.6	537	0.2	0.0053193
2796	2904.9	15149	5	214	0.2	0.0021198
2797	2905.4	21062	14.4	612	0.1	0.00606222
2798	2905.9	18112	4.3	181	0.2	0.00179291
2799	2906.4	18599	9.1	386	0.2	0.00382356
2800	2907	17564	5.8	245	0.2	0.00242687
2801	2907.4	19866	6.2	263	0.1	0.00260517
2802	2907.9	17461	4.3	183	0.2	0.00181272
2803	2908.4	19415	8.9	376	0.1	0.0037245
2804	2909	18449	4.1	173	0.2	0.00171367
2805	2909.4	18239	6.1	261	0.2	0.00258536
2806	2909.9	18831	5	214	0.2	0.0021198
2807	2910.3	15381	6.3	268	0.2	0.0026547
2808	2910.9	16764	3.2	135	0.2	0.00133726
2809	2911.3	15215	5.9	250	0.2	0.0024764
2810	2911.9	10141	3.3	139	0.3	0.00137688
2811	2912.4	15476	11.2	475	0.2	0.00470516
2812	2913	7113	2.1	90	0.4	0.000891504
2813	2913.4	20523	13.1	558	0.1	0.00552732
2814	2913.8	8677	2.1	87	0.3	0.000861787
2815	2914.4	23354	14.3	609	0.1	0.00603251
2816	2914.9	17540	3.2	136	0.2	0.00134716
2817	2915.4	17830	8.4	359	0.2	0.00355611
2818	2915.9	16884	3.6	154	0.2	0.00152546
2819	2916.4	20861	8.5	362	0.1	0.00358583
2820	2916.9	13351	2.3	99	0.2	0.000980654
2821	2917.4	14874	3.6	153	0.2	0.00151556
2822	2917.9	19184	3.5	147	0.2	0.00145612
2823	2918.4	22804	5.2	222	0.1	0.00219904
2824	2918.9	15785	2.7	114	0.2	0.00112924
2825	2919.4	20019	5.7	242	0.1	0.00239715
2826	2919.9	18550	0.2	10	0.2	9.9056e-05
2827	2920.4	20593	1.5	65	0.1	0.000643864
2828	2921.4	20590	1.1	45	0.1	0.000445752
2829	2922	7823	1.6	70	0.4	0.000693392
2830	2922.4	16911	7.7	328	0.2	0.00324904
2831	2923	12638	4.3	183	0.2	0.00181272
2832	2923.4	16752	13.5	574	0.2	0.00568581
2833	2923.9	7885	5.5	234	0.4	0.00231791
2834	2924.4	12634	7.7	326	0.2	0.00322922
2835	2924.9	7662	3.8	160	0.4	0.0015849
2836	2925.4	11061	5	213	0.3	0.00210989
2837	2925.9	16074	3.5	147	0.2	0.00145612
2838	2926.4	20560	8.7	371	0.1	0.00367498
2839	2926.9	12152	3.7	158	0.2	0.00156508
2840	2927.4	17487	8.9	376	0.2	0.0037245
2841	2927.9	15425	3.7	158	0.2	0.00156508
2842	2928.4	21759	18.4	780	0.1	0.00772636
2843	2928.9	18374	4.3	181	0.2	0.00179291
2844	2929.4	24431	27.7	1175	0.1	0.0116391
2845	2929.9	18494	3.2	138	0.2	0.00136697
2846	2930.4	22777	20.6	877	0.1	0.00868721
2847	2931	18461	4.8	204	0.2	0.00202074
2848	2931.4	23612	17.4	739	0.1	0.00732024
2849	2931.9	15678	3.6	153	0.2	0.00151556
2850	2932.4	19547	12	510	0.2	0.00505185
2851	2933	13336	1.7	73	0.2	0.000723108
2852	2933.4	19144	9.7	411	0.2	0.0040712
2853	2934	14540	3.8	162	0.2	0.00160471
2854	2934.5	16422	2.4	102	0.2	0.00101037
2855	2934.9	15639	3.6	153	0.2	0.00151556
2856	2935.4	8844	0.4	19	0.3	0.000188206
2857	2936	16418	3.6	153	0.2	0.00151556
2858	2936.4	16281	3.4	146	0.2	0.00144622
2859	2937	11682	2.7	115	0.3	0.00113914
2860	2937.4	17371	6.1	260	0.2	0.00257545
2861	2937.9	12399	2.2	92	0.2	0.000911315
2862	2938.4	15423	5.5	235	0.2	0.00232781
2863	2939	11361	4.1	173	0.3	0.00171367
2864	2939.4	13880	8.1	342	0.2	0.00338771
2865	2939.9	12148	4.7	198	0.2	0.00196131
2866	2940.4	14511	8.2	347	0.2	0.00343724
2867	2940.9	15573	3.9	166	0.2	0.00164433
2868	2941.4	14207	7.6	322	0.2	0.0031896
2869	2941.9	8228	7.1	300	0.4	0.00297168
2870	2942.4	11609	14.8	628	0.3	0.00622071
2871	2942.9	7356	7	297	0.4	0.00294196
2872	2943.4	14873	10	425	0.2	0.00420988
2873	2943.9	14699	5	213	0.2	0.00210989
2874	2944.4	18772	10.8	459	0.2	0.00454667
2875	2944.9	14034	4.6	194	0.2	0.00192169
2876	2945.4	17791	11	465	0.2	0.0046061
2877	2945.9	15286	4.8	205	0.2	0.00203065
2878	2946.4	16264	7.6	323	0.2	0.00319951
2879	2946.9	16422	3.1	132	0.2	0.00130754
2880	2947.4	15958	8	342	0.2	0.00338771
2881	2948	8727	2.4	102	0.3	0.00101037
2882	2948.4	15702	7.4	313	0.2	0.00310045
[truncated: 104 more rows]

## Sheet: 10 um - Protein Peak Assignment
#	m/z	Res.	S/N	I	FWHM	Assignment		Molecule	Sequence	Mass	Intensity	Relative Intensity [%]		Top Peaks (#)	Relative Intensity [%]	Intensity	Mass	Assignment
1	10005.1	3390	11.7	50	3			Ub-L1	AGAFDADPLVVEIAAAGSMKIKIVPAVGGGSPLELEVAPNATVGAVRTKVCAMKKLPPDTTRLTYKGRALKDTETLESLGVADGDKFVLITRTVGGRELASKDPGAFDADPLVVEISEWSHPQFEK	13189.2	0	0		1	100	575301	33322.7	BcPAP
2	10014.8	1778	4.6	19	5.6			Ub-L2	AGAFDADPLVVEIAAAGSMKIKIVPAVGGGSPLELEVAPNATVGAVRTKVCAMKKLPPDTTRLTYKGRALKDTETLESLGVADGDKFVLITRTVGGRELASKDAGAFDADPLVVEIAAAGSMKIKIVPAVGGGSPLELEVAPNATVGAVRTKVCAMKKLPPDTTRLTYKGRALKDTETLESLGVADGDKFVLITRTVGGRELASKDPGAFDADPLVVEISEWSHPQFEK	23779.5	11	0.00227225		2	63.4103	364800	21180.4	Ub-C2
3	10079.6	2435	2.5	11	4.1			Ub-L3	AGAFDADPLVVEIAAAGSMKIKIVPAVGGGSPLELEVAPNATVGAVRTKVCAMKKLPPDTTRLTYKGRALKDTETLESLGVADGDKFVLITRTVGGRELASKDAGAFDADPLVVEIAAAGSMKIKIVPAVGGGSPLELEVAPNATVGAVRTKVCAMKKLPPDTTRLTYKGRALKDTETLESLGVADGDKFVLITRTVGGRELASKDAGAFDADPLVVEIAAAGSMKIKIVPAVGGGSPLELEVAPNATVGAVRTKVCAMKKLPPDTTRLTYKGRALKDTETLESLGVADGDKFVLITRTVGGRELASKDPGAFDADPLVVEISEWSHPQFEK	34369.8	0	0		3	14.7558	84890	31770.2	Ub-C3
4	10094.4	1937	3.3	14	5.2			Ub-L4	AGAFDADPLVVEIAAAGSMKIKIVPAVGGGSPLELEVAPNATVGAVRTKVCAMKKLPPDTTRLTYKGRALKDTETLESLGVADGDKFVLITRTVGGRELASKDAGAFDADPLVVEIAAAGSMKIKIVPAVGGGSPLELEVAPNATVGAVRTKVCAMKKLPPDTTRLTYKGRALKDTETLESLGVADGDKFVLITRTVGGRELASKDAGAFDADPLVVEIAAAGSMKIKIVPAVGGGSPLELEVAPNATVGAVRTKVCAMKKLPPDTTRLTYKGRALKDTETLESLGVADGDKFVLITRTVGGRELASKDAGAFDADPLVVEIAAAGSMKIKIVPAVGGGSPLELEVAPNATVGAVRTKVCAMKKLPPDTTRLTYKGRALKDTETLESLGVADGDKFVLI…	44960.1	0	0		4	12.1331	69802	33345	BcPAP+23
5	10109.5	2110	4	17	4.8			Ub-L5	AGAFDADPLVVEIAAAGSMKIKIVPAVGGGSPLELEVAPNATVGAVRTKVCAMKKLPPDTTRLTYKGRALKDTETLESLGVADGDKFVLITRTVGGRELASKDAGAFDADPLVVEIAAAGSMKIKIVPAVGGGSPLELEVAPNATVGAVRTKVCAMKKLPPDTTRLTYKGRALKDTETLESLGVADGDKFVLITRTVGGRELASKDAGAFDADPLVVEIAAAGSMKIKIVPAVGGGSPLELEVAPNATVGAVRTKVCAMKKLPPDTTRLTYKGRALKDTETLESLGVADGDKFVLITRTVGGRELASKDAGAFDADPLVVEIAAAGSMKIKIVPAVGGGSPLELEVAPNATVGAVRTKVCAMKKLPPDTTRLTYKGRALKDTETLESLGVADGDKFVLI…	55550.4	228	0.0470975		5	4.87901	28069	21278.7	Ub-C2+100
6	10567.8	1985	329.1	1405	5.3			Ub-L6	AGAFDADPLVVEIAAAGSMKIKIVPAVGGGSPLELEVAPNATVGAVRTKVCAMKKLPPDTTRLTYKGRALKDTETLESLGVADGDKFVLITRTVGGRELASKDAGAFDADPLVVEIAAAGSMKIKIVPAVGGGSPLELEVAPNATVGAVRTKVCAMKKLPPDTTRLTYKGRALKDTETLESLGVADGDKFVLITRTVGGRELASKDAGAFDADPLVVEIAAAGSMKIKIVPAVGGGSPLELEVAPNATVGAVRTKVCAMKKLPPDTTRLTYKGRALKDTETLESLGVADGDKFVLITRTVGGRELASKDAGAFDADPLVVEIAAAGSMKIKIVPAVGGGSPLELEVAPNATVGAVRTKVCAMKKLPPDTTRLTYKGRALKDTETLESLGVADGDKFVLI…	66140.7	0	0		6	4.37945	25195	21216.7	Ub-c+36
7	10589.9	1637	5411.8	23098	6.5	deconvolution artefact!		Ub-C1	AGAFDADPLVVEIAAAGSMKIKIVPAVGGGSPLELEVAPNATVGAVRTKVCAMKKLPPDTTRLTYKGRALKDTETLESLGVADGDKFVLITRTVGGRELASKD	10590.3	23098	4.77131		7	4.0843	23497	33365.8	BcPAP+43
8	10619.4	1103	633.3	2703	9.6			Ub-C2	AGAFDADPLVVEIAAAGSMKIKIVPAVGGGSPLELEVAPNATVGAVRTKVCAMKKLPPDTTRLTYKGRALKDTETLESLGVADGDKFVLITRTVGGRELASKDAGAFDADPLVVEIAAAGSMKIKIVPAVGGGSPLELEVAPNATVGAVRTKVCAMKKLPPDTTRLTYKGRALKDTETLESLGVADGDKFVLITRTVGGRELASKD	21180.6	364800	75.356		8	4.01494	23098	10589.9	deconvolution artefact!
9	10624.4	2216	599.4	2558	4.8			Ub-C3	AGAFDADPLVVEIAAAGSMKIKIVPAVGGGSPLELEVAPNATVGAVRTKVCAMKKLPPDTTRLTYKGRALKDTETLESLGVADGDKFVLITRTVGGRELASKDAGAFDADPLVVEIAAAGSMKIKIVPAVGGGSPLELEVAPNATVGAVRTKVCAMKKLPPDTTRLTYKGRALKDTETLESLGVADGDKFVLITRTVGGRELASKDAGAFDADPLVVEIAAAGSMKIKIVPAVGGGSPLELEVAPNATVGAVRTKVCAMKKLPPDTTRLTYKGRALKDTETLESLGVADGDKFVLITRTVGGRELASKD	31770.9	84890	17.5356		9	3.92594	22586	16661.3	deconvolution artefact!
10	10636	1972	143.5	612	5.4			Ub-C4	AGAFDADPLVVEIAAAGSMKIKIVPAVGGGSPLELEVAPNATVGAVRTKVCAMKKLPPDTTRLTYKGRALKDTETLESLGVADGDKFVLITRTVGGRELASKDAGAFDADPLVVEIAAAGSMKIKIVPAVGGGSPLELEVAPNATVGAVRTKVCAMKKLPPDTTRLTYKGRALKDTETLESLGVADGDKFVLITRTVGGRELASKDAGAFDADPLVVEIAAAGSMKIKIVPAVGGGSPLELEVAPNATVGAVRTKVCAMKKLPPDTTRLTYKGRALKDTETLESLGVADGDKFVLITRTVGGRELASKDAGAFDADPLVVEIAAAGSMKIKIVPAVGGGSPLELEVAPNATVGAVRTKVCAMKKLPPDTTRLTYKGRALKDTETLESLGVADGDKFVLI…	42361.2	5298	1.0944		10	3.59308	20671	33422	BcPAP+100
11	10648.6	1176	41.8	178	9.1			Ub-C5	AGAFDADPLVVEIAAAGSMKIKIVPAVGGGSPLELEVAPNATVGAVRTKVCAMKKLPPDTTRLTYKGRALKDTETLESLGVADGDKFVLITRTVGGRELASKDAGAFDADPLVVEIAAAGSMKIKIVPAVGGGSPLELEVAPNATVGAVRTKVCAMKKLPPDTTRLTYKGRALKDTETLESLGVADGDKFVLITRTVGGRELASKDAGAFDADPLVVEIAAAGSMKIKIVPAVGGGSPLELEVAPNATVGAVRTKVCAMKKLPPDTTRLTYKGRALKDTETLESLGVADGDKFVLITRTVGGRELASKDAGAFDADPLVVEIAAAGSMKIKIVPAVGGGSPLELEVAPNATVGAVRTKVCAMKKLPPDTTRLTYKGRALKDTETLESLGVADGDKFVLI…	52951.5	607	0.125387		11	2.62715	15114	15885	deconvolution artefact!
12	10829.9	15753	3.9	17	0.7			Ub-C6	AGAFDADPLVVEIAAAGSMKIKIVPAVGGGSPLELEVAPNATVGAVRTKVCAMKKLPPDTTRLTYKGRALKDTETLESLGVADGDKFVLITRTVGGRELASKDAGAFDADPLVVEIAAAGSMKIKIVPAVGGGSPLELEVAPNATVGAVRTKVCAMKKLPPDTTRLTYKGRALKDTETLESLGVADGDKFVLITRTVGGRELASKDAGAFDADPLVVEIAAAGSMKIKIVPAVGGGSPLELEVAPNATVGAVRTKVCAMKKLPPDTTRLTYKGRALKDTETLESLGVADGDKFVLITRTVGGRELASKDAGAFDADPLVVEIAAAGSMKIKIVPAVGGGSPLELEVAPNATVGAVRTKVCAMKKLPPDTTRLTYKGRALKDTETLESLGVADGDKFVLI…	63541.9	5170	1.06796		12	2.58056	14846	21199.7	Ub-C2+19
13	10853.5	1645	13.3	57	6.6									13	1.75369	10089	33281.4	BcPAP-40
14	11034.3	2517	8.6	37	4.4									14	1.71771	9882	21297.8	Ub-C2+117
15	11088.3	2392	16.7	71	4.6									15	1.59934	9201	44136.4	n.d.
16	11107.8	1769	823.7	3516	6.3									16	1.29915	7474	33445	BcPAP+123
17	11130.4	899	37	158	12.4
18	11138.1	1468	46.9	200	7.6
19	11143.1	1484	43	184	7.5
20	11360.2	1541	62.9	268	7.4
21	11379.8	1730	24.3	104	6.6
22	11390.4	1767	26.2	112	6.4
23	11399	2019	46.7	199	5.6
24	11413.5	2843	114	487	4
25	11424.4	1437	18.7	80	7.9
26	11436.1	2258	139.1	594	5.1
27	11618.3	1781	3.7	16	6.5
28	11910.2	2881	44.7	191	4.1
29	11918.2	3020	23.9	102	3.9
30	11968.9	1657	8.3	35	7.2
31	12190.6	2569	2.9	12	4.7
32	12379.8	1216	2.8	12	10.2
33	12431.8	2439	11.9	51	5.1
34	12456.1	2792	13.9	59	4.5
35	12464.5	1663	12.1	51	7.5
36	12472.1	1795	12.6	54	6.9
37	12476.2	2057	12.2	52	6.1
38	12492.7	2913	3	13	4.3
39	12505.8	3565	68.8	294	3.5
40	12516.6	2596	9.4	40	4.8
41	12610.7	2481	3.1	13	5.1
42	12705.4	1397	12.4	53	9.1
43	12712	1586	8.9	38	8
44	12732.1	1658	3.1	13	7.7
45	12746	3046	5.7	24	4.2
46	12815.1	1847	3.8	16	6.9
47	13001	2102	10.4	44	6.2
48	13239.7	1891	11.8	50	7
49	13487	2239	3.1	13	6
50	13665.3	2050	3.7	16	6.7
51	13702.8	2303	125.1	534	5.9
52	13723.4	1884	4.9	21	7.3
53	13769.3	2787	11.2	48	4.9
54	13793.9	2436	5.2	22	5.7
55	13817.7	2097	37.6	160	6.6
56	13976.8	2930	7.9	34	4.8
57	14125.2	2055	10.8	46	6.9
58	14143.4	1439	50.4	215	9.8
59	14157.5	1709	95.4	407	8.3
60	14189.3	2690	10.5	45	5.3
61	14278.1	2676	2.5	10	5.3
62	14291.6	2566	10.3	44	5.6
63	14529	2776	7.4	32	5.2
64	14559.1	2200	330.4	1410	6.6
65	14575.5	3134	24.7	105	4.7
66	14628.9	2313	15.1	64	6.3
67	14700.4	1989	2.5	10	7.4
68	14713.4	1725	13.3	57	8.5
69	14725.1	2694	9.1	39	5.5
70	14947.7	2833	9.7	41	5.3
71	15078.4	3169	4.5	19	4.8
72	15141.8	1728	2.4	10	8.8
73	15194.7	3021	10.8	46	5
74	15211.4	2095	2.7	12	7.3
75	15297.6	2875	5.4	23	5.3
76	15311.6	2138	2.9	12	7.2
77	15442.9	2082	15.9	68	7.4
78	15527.7	2158	57.7	246	7.2
79	15841	2293	2.7	12	6.9
80	15862.1	1782	211.6	903	8.9
81	15872.6	2815	513.8	2193	5.6
82	15885	2107	3541.2	15114	7.5	deconvolution artefact!
83	15903.3	1177	942.2	4021	13.5
84	15935	1944	77	329	8.2
85	15974.8	3222	6.9	30	5
86	16194.4	2022	450.5	1923	8
87	16215.4	1765	68.9	294	9.2
88	16231.5	1897	185.7	793	8.6
89	16251.4	4076	160.4	684	4
90	16257.4	4275	152.9	653	3.8
91	16275.2	1717	580.2	2476	9.5
92	16285.2	2302	314.4	1342	7.1
93	16303.3	2394	63.8	272	6.8
94	16637.1	2209	178	760	7.5
95	16661.3	2248	5291.7	22586	7.4	deconvolution artefact!
96	16695	1462	436.6	1863	11.4
97	16705.5	1519	347.6	1483	11
98	16716.5	1115	535.7	2287	15
99	17052.4	2781	44	188	6.1
100	17067.8	1849	28.2	120	9.2
101	17086.6	1474	70.3	300	11.6
102	17108.9	2135	8.9	38	8
103	17117.3	2794	20.6	88	6.1
104	17161.4	2843	3.5	15	6
105	17205.4	3615	18.2	78	4.8
106	17424	2147	69.2	296	8.1
107	17442.8	1586	141.2	603	11
108	17455.1	1659	137.9	588	10.5
109	17466.7	2347	38.3	163	7.4
110	17490.6	2045	10.8	46	8.6
111	17500.4	2789	22.6	96	6.3
112	17508.3	4924	11.7	50	3.6
113	17527.1	2674	36.7	157	6.6
114	17538.6	3088	18.2	78	5.7
115	17652.3	1884	12	51	9.4
116	17661	3443	6.9	29	5.1
117	17956	2029	9.8	42	8.8
118	18010.6	4163	7.1	30	4.3
119	18251.8	4210	8.9	38	4.3
120	18355.4	1829	5.9	25	10
121	18387.3	3803	10.8	46	4.8
122	18509.7	2522	4.4	19	7.3
123	18528.1	2190	14.2	61	8.5
124	18538.4	2512	6.1	26	7.4
125	18621.1	2501	43.1	184	7.4
126	18693.6	2125	68.4	292	8.8
127	18773.9	3600	94.2	402	5.2
128	18795.8	2876	27.9	119	6.5
129	18916	2658	5.6	24	7.1
130	19342.3	2208	4.2	18	8.8
131	19361	3070	2.9	12	6.3
132	19376.5	4547	4.4	19	4.3
133	19652.2	2176	7	30	9
134	19663.7	2981	2.8	12	6.6
135	19772.4	4769	40.2	172	4.1
136	19785.6	3119	16.9	72	6.3
137	19802.8	2356	20.8	89	8.4
138	19812.2	1610	21.5	92	12.3
139	19837.8	2077	34	145	9.5
140	19862.6	2060	164.6	703	9.6
141	19872.9	4664	43.9	187	4.3
142	19888	2499	4.3	18	8
143	19937.8	2065	37.3	159	9.7
144	19950	2551	22.9	98	7.8
145	19970.3	2784	6.8	29	7.2
146	19989	2301	10.5	45	8.7
147	20002.1	5110	453.1	1934	3.9
148	20009	5066	346.2	1478	3.9
149	20018.4	3336	32.1	137	6
150	20026.6	1803	36	154	11.1
151	20042.2	3759	4.6	20	5.3
152	20151.8	3012	2.7	12	6.7
153	20170.4	3221	5.1	22	6.3
154	20176.8	3455	3.9	17	5.8
155	20185.6	4955	5.2	22	4.1
156	20718.6	2448	6	26	8.5
157	21134.7	3299	13.5	58	6.4
158	21148.8	3290	10.4	44	6.4
159	21162.6	2603	724.3	3091	8.1
160	21180.4	2311	85470.9	364800	9.2	Ub-C2
161	21199.7	1325	3478.4	14846	16	Ub-C2+19
162	21216.7	1976	5903.2	25195	10.7	?
163	21235.5	2623	937	3999	8.1
164	21251.4	4770	213.6	912	4.5
165	21278.7	2330	6576.5	28069	9.1	?
166	21297.8	2865	2315.4	9882	7.4	Ub-C2+117
167	21316.2	4024	17.7	75	5.3
168	21331.4	3941	6.9	29	5.4
169	21359.1	2615	1721.9	7349	8.2
170	21376.7	3576	26	111	6
171	21418.9	4216	32.7	140	5.1
172	21437.6	4046	144.3	616	5.3
173	21962.9	2554	3.2	13	8.6
174	21978.1	5299	10.1	43	4.1
175	22067.6	4029	106.3	454	5.5
176	22455.5	3389	2.5	11	6.6
177	22473	2801	5.7	24	8
178	22491.5	2337	24.2	103	9.6
179	22502	5357	139.9	597	4.2
180	22510.2	5635	243.5	1039	4
181	22518.9	4023	40.3	172	5.6
182	22539.8	2307	105.2	449	9.8
183	22560.2	2983	4.1	18	7.6
184	22572.3	2770	16.9	72	8.1
185	22590.9	3132	9.6	41	7.2
186	22614.1	2161	21.2	91	10.5
187	22626.9	2881	3.9	17	7.9
188	22697.5	3618	7.2	31	6.3
189	22718.4	2706	11.6	50	8.4
190	22735.3	3867	2.9	12	5.9
191	22758.2	3344	30.9	132	6.8
192	22778.2	3045	7.5	32	7.5
193	22798.5	3590	18.9	81	6.4
194	22825.3	4400	2.4	10	5.2
195	22877.4	3348	2.4	10	6.8
196	22995.2	3857	7	30	6
197	23005.7	3475	16.4	70	6.6
198	23069.6	2816	3.2	14	8.2
199	23089.7	2461	2.8	12	9.4
200	23101	2120	4	17	10.9
201	23136.3	6144	8.7	37	3.8
202	23144.3	3058	5.3	23	7.6
203	23220.9	2764	4.7	20	8.4
204	23231.2	1753	4.7	20	13.3
205	23485.4	3596	14.6	62	6.5
206	23536.8	3191	6.9	29	7.4
207	23553.7	2616	3.4	14	9
208	23672.8	4964	159.3	680	4.8
209	23697	3754	7.3	31	6.3
210	23780.8	2643	2.6	11	9
211	23804.2	2350	20.8	89	10.1
212	23822.5	2892	9.2	39	8.2
213	23834	3148	4.6	19	7.6
214	23902.2	3768	3.2	13	6.3
215	24010.3	1749	3.3	14	13.7
216	24024.2	3523	8.1	35	6.8
217	24140.1	2533	2.6	11	9.5
218	24419.9	7101	2.9	12	3.4
219	24552.7	3290	9.4	40	7.5
220	24731	3270	3.7	16	7.6
221	24749.8	2221	5.9	25	11.1
222	24776.2	3579	14.5	62	6.9
223	24798.6	3039	2.8	12	8.2
224	24829.8	4135	3.6	15	6
225	24865.2	4311	3.1	13	5.8
226	24913.3	4959	6.8	29	5
227	24942.5	4042	2.4	10	6.2
228	25011.8	6315	33.8	144	4
229	25022.8	4006	11.5	49	6.2
230	25032.7	3112	19.2	82	8
231	25154.9	2287	41.7	178	11
232	25174.9	2820	10	43	8.9
233	25195.7	2762	99.8	426	9.1
234	25214.9	3162	45.4	194	8
235	25391	3393	5.9	25	7.5
236	25400.4	2922	3.1	13	8.7
237	25412	2886	8.1	35	8.8
238	25433.3	3575	39.4	168	7.1
239	25461.6	5857	9.5	41	4.3
240	25627.4	5588	6	26	4.6
241	25637.7	4293	7.2	31	6
242	25891.3	4379	3.5	15	5.9
243	26009.7	3356	6.7	29	7.7
244	26159.4	3381	23	98	7.7
245	26167.9	2719	13.8	59	9.6
246	26201	3588	8.4	36	7.3
247	26242.1	2874	3.1	13	9.1
248	26251.6	5809	3.5	15	4.5
249	26273.9	5271	2.4	10	5
250	26284.5	3396	4.5	19	7.7
251	26487	2418	170.3	727	11
252	26508.1	3505	20	85	7.6
253	26515.2	2766	32	137	9.6
254	26541.5	3403	3	13	7.8
255	26802.1	2938	6.1	26	9.1
256	26818.9	3349	62.6	267	8
257	26861.6	7169	9.7	41	3.7
258	26872.8	2640	4.8	21	10.2
259	26958.8	3374	2.6	11	8
260	26974.2	4340	18.3	78	6.2
261	27061.7	3869	5.2	22	7
262	27074.3	2986	4	17	9.1
263	27085.4	2666	3	13	10.2
264	27157.3	3982	2.5	11	6.8
265	27190.5	2947	5	21	9.2
266	27387.8	2758	13.9	60	9.9
267	27402.1	2698	29.4	126	10.2
268	27413	3949	32.2	137	6.9
269	27417.5	4347	28.3	121	6.3
270	27441.6	2663	23.4	100	10.3
271	27468	3905	2.7	11	7
272	27524.1	6954	2.9	12	4
273	27535.3	4164	3	13	6.6
274	27635.6	2911	6.2	26	9.5
275	27756.8	3967	3.5	15	7
276	27765.1	2608	4.5	19	10.6
277	27777.6	4010	10.3	44	6.9
278	27791.9	3430	9.2	39	8.1
279	27804.9	2141	5.7	24	13
280	27873.9	2816	2.7	12	9.9
281	27922.6	4039	10.6	45	6.9
282	27952.8	3366	13.4	57	8.3
283	28196.8	3149	4.8	21	9
284	28213.3	2725	2.8	12	10.4
285	28239.4	2609	2.8	12	10.8
286	28248.9	2855	2.6	11	9.9
287	28257.2	2740	3.1	13	10.3
288	28274.5	3121	15.7	67	9.1
289	28379.8	4226	2.4	10	6.7
290	28657.6	3451	60.5	258	8.3
291	28693.4	4054	19.5	83	7.1
292	28882	2436	4.9	21	11.9
293	28898	5880	19.3	82	4.9
294	28909	3566	4.7	20	8.1
295	28980.4	2894	11.9	51	10
296	29008.4	2957	11	47	9.8
297	29016.5	3569	8	34	8.1
298	29045.9	4420	24.4	104	6.6
299	29097.6	2705	2.6	11	10.8
300	29117.2	3177	40.1	171	9.2
301	29129.5	2980	23.6	101	9.8
302	29152	3597	28.5	122	8.1
303	29233.3	4197	3.3	14	7
304	29253.5	3954	4.7	20	7.4
305	29282.2	3923	2.7	12	7.5
306	29371.7	3575	4.3	18	8.2
307	29400.9	6387	6	26	4.6
308	29415.2	2458	13.9	59	12
309	29423.3	2793	14.3	61	10.5
310	29449.9	4766	9.9	42	6.2
311	29656.3	2983	8.3	35	9.9
312	29901.8	2965	10	43	10.1
313	30014.4	7033	3.1	13	4.3
314	30071.2	4235	13	56	7.1
315	30093.2	2895	5.6	24	10.4
316	30158.1	3898	4	17	7.7
317	30223.4	2229	3.6	15	13.6
318	30240.2	4075	5.1	22	7.4
319	30278.3	6192	4.9	21	4.9
320	30288.4	5734	2.7	11	5.3
321	30339	3262	5.6	24	9.3
322	30359.2	2957	17	73	10.3
323	30384	2962	40.3	172	10.3
324	30425.4	3086	33.9	145	9.9
325	30441.7	3142	60.6	259	9.7
326	30480.6	3435	11.7	50	8.9
327	30498.4	2817	10	43	10.8
328	30546.5	4234	2.6	11	7.2
329	30550.2	4061	2.8	12	7.5
330	30591.6	5075	31.2	133	6
331	30618.8	2712	11.4	49	11.3
332	30823.8	4233	8.5	36	7.3
333	30848.9	2845	3.1	13	10.8
334	30858.3	2701	3.2	14	11.4
335	30885.4	3213	8.6	37	9.6
336	30955.6	5085	8.5	36	6.1
337	30999.6	4300	6.5	28	7.2
338	31035.5	4126	6.5	28	7.5
339	31051.8	3750	50.8	217	8.3
340	31066.6	2755	17.5	75	11.3
341	31100.1	2444	4.4	19	12.7
342	31118.9	6025	10.4	44	5.2
343	31148.6	2225	28.3	121	14
344	31203.3	3151	3.1	13	9.9
345	31607.3	2810	2.5	11	11.2
346	31656.1	4186	3.3	14	7.6
347	31664.2	3778	4.3	18	8.4
348	31678.8	4030	7.4	32	7.9
349	31696.2	4493	57.3	245	7.1
350	31705	4262	31.8	136	7.4
351	31724.8	3461	327.8	1399	9.2
352	31738.6	3130	350	1494	10.1
353	31752	2887	593.6	2533	11
354	31770.2	2914	19889.2	84890	10.9	Ub-C3
355	31805.3	1783	1241.9	5301	17.8
356	31840	2573	98.6	421	12.4
357	31870	3523	744	3176	9
358	31888.1	5466	54.9	234	5.8
359	31908.3	3190	6.2	27	10
360	31948.2	5332	20.5	88	6
361	32373.1	2770	7.8	33	11.7
362	32399.4	3927	119.4	510	8.3
363	32416.9	3510	161.2	688	9.2
364	32446.6	2816	455.4	1944	11.5
365	32467.6	3381	553.3	2361	9.6
366	32476.7	2054	724.7	3093	15.8
367	32503.6	4211	275.6	1176	7.7
368	32515.3	6726	549.6	2346	4.8
369	32529.2	4974	592.2	2528	6.5
370	32541.9	2323	413.2	1764	14
371	32553.5	4813	435.4	1858	6.8
372	32590.2	3095	38.8	166	10.5
373	33100	3564	8.4	36	9.3
374	33256.1	3455	416.9	1779	9.6
375	33281.4	3026	2363.8	10089	11	BcPAP-40
376	33322.7	2928	134790	575301	11.4	BcPAP
377	33345	1881	16354.2	69802	17.7	BcPAP+23
378	33365.8	2311	5505.2	23497	14.4	BcPAP+43
379	33422	2550	4843	20671	13.1	BcPAP+100
380	33445	2747	1751.1	7474	12.2	BcPAP+123
381	33462.4	5064	440.4	1880	6.6
382	33482.9	4967	5.4	23	6.7
383	34051.4	3618	2.5	11	9.4
384	34078.7	2502	98.4	420	13.6
385	34103	2441	450.3	1922	14
386	34115	3380	714.6	3050	10.1
387	34133.4	3546	360.6	1539	9.6
388	34157	3723	380.9	1626	9.2
389	34174.7	2199	396.6	1693	15.5
390	34187.2	4896	469.7	2005	7
391	34198.9	2394	341.2	1456	14.3
392	34218.3	3071	218.6	933	11.1
393	34230.4	4149	193.1	824	8.3
394	34242	2920	329	1404	11.7
395	34271.7	4714	58.9	251	7.3
396	34307.9	4537	65.3	279	7.6
397	34405.5	5262	28.4	121	6.5
398	34412.5	3329	22.3	95	10.3
399	34776.7	4845	3	13	7.2
400	34806.6	3709	13.6	58	9.4
401	34853.3	2523	91.1	389	13.8
402	34876.2	3515	314.3	1341	9.9
403	34884.3	4613	180.5	770	7.6
404	34906	3173	94.5	403	11
405	34912.8	3489	117.6	502	10
406	34945.9	4386	160.3	684	8
407	34968.9	4239	23.8	102	8.3
408	34982	7058	77.9	332	5
409	34989.6	3655	36.2	155	9.6
410	35017.4	7329	8.3	36	4.8
411	35030.6	6708	15.1	64	5.2
412	35055.3	4012	50.7	216	8.7
413	35078.1	4206	20.7	88	8.3
414	35277.2	3437	2.4	10	10.3
415	35299.3	4061	42.9	183	8.7
416	35324.7	5031	3.8	16	7
417	35330.3	4380	2.4	10	8.1
418	35592.7	3778	6.1	26	9.4
419	35627.8	5617	5.1	22	6.3
420	35642.1	7132	5.6	24	5
421	35657.4	4698	7.3	31	7.6
422	35666	4195	7.1	30	8.5
423	35695	4912	5.9	25	7.3
424	35701.8	3816	8.7	37	9.4
425	35732.5	3533	220.9	943	10.1
426	35757.7	2905	86.8	370	12.3
427	35801	3418	8.4	36	10.5
428	35818.8	3651	17	73	9.8
429	35849.5	5214	3.6	15	6.9
430	35854.3	3725	3.9	17	9.6
431	35866.8	4743	4.9	21	7.6
432	35908.2	3482	32.4	138	10.3
433	35955.7	3358	6	25	10.7
434	36020.3	5674	3.2	14	6.3
435	36027	3863	2.8	12	9.3
436	36098.4	4079	25.8	110	8.9
437	36109.4	3283	14.6	62	11
438	36122.8	3955	12.2	52	9.1
439	36137.4	3404	26.3	112	10.6
440	36282.8	6136	5.6	24	5.9
441	36289.7	3193	3.8	16	11.4
442	36304.2	3516	7.2	31	10.3
443	36426.2	2944	2.3	10	12.4
444	36440.7	4829	12.7	54	7.5
445	36469.4	5275	8.2	35	6.9
446	36483.2	3223	6.9	29	11.3
447	36495.9	3318	6.3	27	11
448	36503	7089	15.8	68	5.1
449	36551	4021	4.8	20	9.1
450	36557.7	5317	3.1	13	6.9
451	36573.6	3441	35.1	150	10.6
452	36641.2	6135	7.1	30	6
453	36653.5	3154	11.6	50	11.6
454	36680.2	3743	6.6	28	9.8
455	36710.3	3123	13.1	56	11.8
456	36739.7	4718	11.6	50	7.8
457	36775.8	4261	91.3	390	8.6
458	36922.8	4444	2.9	12	8.3
459	37026.1	3664	5.3	23	10.1
460	37056.1	5034	17.4	74	7.4
461	37085.8	2492	7.6	33	14.9
462	37122.4	4682	17.2	73	7.9
463	37163.5	3284	9.6	41	11.3
464	37198.3	3839	2.8	12	9.7
465	37243.7	4068	53.3	227	9.2
466	37289.5	3788	78.1	334	9.8
467	37367.9	4904	9.8	42	7.6
468	37387.2	4386	21.4	91	8.5
469	37412.7	3551	8.1	35	10.5
470	37434.7	3337	3.3	14	11.2
471	37518.1	8042	21.4	91	4.7
472	37533.8	5450	3.5	15	6.9
473	37548.1	4034	31.1	133	9.3
474	37587.8	4320	7.1	30	8.7
475	37591.7	3841	6.5	28	9.8
476	37650.2	5485	2.7	12	6.9
477	37703.1	3788	8.7	37	10
478	37761.6	4187	3.7	16	9
479	37830.9	4374	9.7	41	8.6
480	37849.8	6498	4.5	19	5.8
481	37878.1	4006	4.8	20	9.5
482	37945.5	4623	3.9	17	8.2
483	38089.3	4220	6.7	28	9
484	38115.1	3405	8	34	11.2
485	38127.3	5034	12.9	55	7.6
486	38192.9	3602	4.4	19	10.6
487	38220.2	5199	4.5	19	7.4
488	38251	3574	2.4	10	10.7
489	38392.2	3471	31.8	136	11.1
490	38447.9	4745	9.2	39	8.1
491	38480.3	3970	2.7	12	9.7
492	38489.9	3268	2.9	12	11.8
493	38503.6	3013	2.4	10	12.8
494	38513.5	3229	2.6	11	11.9
495	38530.1	4219	3.9	17	9.1
496	38586.7	2654	24.2	103	14.5
497	38596.6	4408	25.6	109	8.8
498	38614.1	3241	194.9	832	11.9
499	38623.6	4147	124.3	531	9.3
500	38655.6	4952	2.7	11	7.8
501	38677.3	3567	5.8	25	10.8
502	38690.1	2981	6.8	29	13
503	38722.5	4589	35.3	151	8.4
504	38751.4	6104	2.7	12	6.3
505	38800.5	3879	18.4	78	10
506	38820.4	4315	13.5	58	9
507	38827.7	4693	17.4	74	8.3
508	38841.7	2719	16.8	72	14.3
509	38868	2924	18.4	78	13.3
510	38878.4	4741	12.7	54	8.2
511	38992.7	2985	19.1	81	13.1
512	39001.4	4052	19.4	83	9.6
513	39028.7	3620	5.6	24	10.8
514	39071.2	8315	2.4	10	4.7
515	39120.8	3856	4.2	18	10.1
516	39155.2	3350	3.1	13	11.7
517	39304.1	3903	8.6	37	10.1
518	39330.3	4359	3.9	17	9
519	39394.1	7623	4.6	20	5.2
520	39529.8	5700	18.5	79	6.9
521	39545.3	9777	108.8	464	4
522	39576.6	4289	6	25	9.2
523	39603.6	3138	5	21	12.6
524	39622.9	3232	6	25	12.3
525	39673	3334	3.7	16	11.9
526	39730.4	3249	20.9	89	12.2
527	39745.8	3984	10.7	46	10
528	39771.5	4450	16.4	70	8.9
529	39799.5	2539	6.3	27	15.7
530	39805.6	3406	8.2	35	11.7
531	39824.6	4451	34.2	146	8.9
532	39832.2	3343	45.9	196	11.9
533	39861.3	4930	50.3	215	8.1
534	39874.7	3315	20.7	88	12
535	39889.3	3966	11.5	49	10.1
536	39897	5314	8.4	36	7.5
537	40003.9	7763	12.9	55	5.2
538	40018.6	7607	14.3	61	5.3
539	40036	7576	11.2	48	5.3
540	40054.1	3837	34.4	147	10.4
541	40132.2	4319	3.2	14	9.3
542	40156.5	3394	2.5	11	11.8
543	40187.8	3320	4.5	19	12.1
544	40326.1	4535	3.7	16	8.9
545	40330.3	4190	3.6	15	9.6
546	40434.7	3573	3	13	11.3
547	40452.8	4203	3.9	17	9.6
548	40461.4	5440	6.8	29	7.4
549	40469.4	3309	6.9	29	12.2
550	40628.7	6435	2.5	11	6.3
551	40644.9	4345	4.7	20	9.4
552	40660.1	7417	27.5	117	5.5
553	40730.6	4278	5.9	25	9.5
554	40819.6	4524	10.3	44	9
555	40848	3214	5.9	25	12.7
556	40898.4	3572	4.1	18	11.4
557	40920.6	3505	2.4	10	11.7
558	40945	3984	45.6	195	10.3
559	40950.1	5188	44.9	192	7.9
560	40975.7	2217	4.1	17	18.5
561	40995.5	3695	30.4	130	11.1
562	41003.4	4970	28.5	122	8.3
563	41027.9	4317	142.6	609	9.5
564	41044.9	3822	94.2	402	10.7
565	41067.2	5298	81.9	349	7.8
566	41080.5	3145	116.2	496	13.1
567	41100.2	3545	142.9	610	11.6
568	41116	3276	86.8	370	12.5
569	41146.8	2276	42.2	180	18.1
570	41183.3	3428	123.3	526	12
571	41218.2	3155	74.4	318	13.1
572	41234.1	4220	32.6	139	9.8
573	41243.8	4608	21.5	92	9
574	41253.5	6658	48.7	208	6.2
575	41269.3	8477	19.6	84	4.9
576	41286.6	9466	20.9	89	4.4
577	41300.4	3004	6.9	29	13.8
578	41370.2	3669	5.7	24	11.3
579	41378.6	4299	4.4	19	9.6
580	41396	3383	6.9	29	12.2
581	41450.5	4252	78.7	336	9.7
582	41471.8	4309	9.5	40	9.6
583	41877.7	5417	8.9	38	7.7
584	41927.6	5870	6.3	27	7.1
585	42269.9	4137	11.4	49	10.2
586	42297.9	5095	10.7	46	8.3
587	42324.7	4621	244.7	1044	9.2
588	42330.9	4270	229	977	9.9
589	42361	3552	1241.2	5298	11.9
590	42396.7	5139	237.7	1014	8.3
591	42409.9	3247	153.5	655	13.1
592	42433.8	5143	234.3	1000	8.3
593	42481.2	3056	254.8	1088	13.9
594	42502.7	5554	90.8	388	7.7
595	42519.9	8711	50.5	216	4.9
596	42538.5	7044	13	56	6
597	42554.9	4421	116.2	496	9.6
598	42562.3	3429	121.7	519	12.4
599	42588.5	4696	86.1	368	9.1
600	42597	3365	85	363	12.7
601	42625.5	3444	10.7	46	12.4
602	42661	4619	3.1	13	9.2
603	42719.7	3531	66.6	284	12.1
604	42733.3	6248	14.7	63	6.8
605	42753.6	3731	6	25	11.5
606	42836.2	4596	23.6	101	9.3
607	42876	4443	70.1	299	9.7
608	43324.4	3938	2.4	10	11
609	43419.9	3956	3.9	17	11
610	43471.4	8262	2.8	12	5.3
611	43504.6	4633	3.5	15	9.4
612	43537.1	5615	12.1	52	7.8
613	43577.7	4345	17.6	75	10
614	43597.2	3404	14.6	62	12.8
615	43609.5	4226	19.9	85	10.3
616	43639	3427	10.1	43	12.7
617	43648.9	4818	9.9	42	9.1
618	43669.6	4736	78.8	336	9.2
619	43681.7	5776	48.5	207	7.6
620	43699.2	5530	23.1	99	7.9
621	43726.1	4543	11.7	50	9.6
622	43733	4130	10.4	44	10.6
623	43753.2	7399	7.3	31	5.9
624	43771.3	9074	61.5	262	4.8
625	43788.7	7420	27.3	116	5.9
626	43803.5	4745	19.8	84	9.2
627	43813.4	4552	11.5	49	9.6
628	43846.7	3586	7.7	33	12.2
629	43887.7	4560	20.9	89	9.6
630	44064.9	4192	4.4	19	10.5
631	44092.8	5778	7.9	34	7.6
632	44108.5	5002	30.1	128	8.8
633	44136.4	4134	2155.8	9201	10.7	?
634	44164	3997	46.9	200	11
635	44180	5355	47	201	8.3
636	44193.3	2917	63.2	270	15.1
637	44221.7	4111	10	43	10.8
638	44241.4	5812	18.8	80	7.6
639	44356.4	4782	2.4	10	9.3
640	44414.1	5596	13.9	60	7.9
641	44433.2	3656	4.7	20	12.2
642	44451.1	4703	2.6	11	9.5
643	44701.4	3916	16	68	11.4
644	44713.4	4189	37.3	159	10.7
645	44722.4	6164	46	196	7.3
646	44733.8	4501	10.4	45	9.9
647	44753	4688	8.4	36	9.5
648	44772.5	3474	18.9	81	12.9
649	44824	4043	9.2	39	11.1
650	44841.4	4666	18.4	79	9.6
651	44874.7	3333	3.6	15	13.5
652	44909.2	4927	10.8	46	9.1
653	44916.1	3883	12.2	52	11.6
654	44946.8	4882	11.6	50	9.2
655	44971.1	2875	3.8	16	15.6
656	44982.9	4007	12.2	52	11.2
657	45002.8	8431	16.5	70	5.3
658	45021.1	8675	47.6	203	5.2
659	45039.2	5636	10.2	43	8
660	45087.9	3965	10.2	43	11.4
661	45142.6	4900	8.7	37	9.2
662	45148.7	3954	9.1	39	11.4
663	45176.8	9659	65.3	279	4.7
664	45224.1	4219	62.5	267	10.7
665	45230.9	4376	75.2	321	10.3
666	45253.4	4204	15.9	68	10.8
667	45281.7	3609	3.4	15	12.5
668	45287	4036	3.3	14	11.2
669	45314.4	3811	2.6	11	11.9
670	45356.3	3009	2.7	12	15.1
671	45387.7	3468	3.7	16	13.1
672	45436	4474	11.2	48	10.2
673	45451.9	5739	2.7	12	7.9
674	45516.7	4486	3.3	14	10.1
675	45524.6	4890	4.3	18	9.3
676	45551.2	4759	5.6	24	9.6
677	45588	4474	16	68	10.2
678	45597	4748	12.7	54	9.6
679	45628.8	10630	9.5	41	4.3
680	45647.9	5356	6	25	8.5
681	45664.9	7028	4.5	19	6.5
682	45699.6	4243	8.1	35	10.8
683	45723.7	4080	19.8	85	11.2
684	45752.9	4801	5.2	22	9.5
685	45817.1	3332	3.6	15	13.8
686	45827.3	4271	2.8	12	10.7
687	45887.1	3889	5.3	23	11.8
688	45901.7	3962	4.5	19	11.6
689	45910.8	4265	4.5	19	10.8
690	45922.7	3498	2.4	10	13.1
691	45938.5	4197	2.4	10	10.9
692	46012.6	4228	6	26	10.9
693	46059.8	4267	3.9	17	10.8
694	46099.4	3444	47.4	202	13.4
695	46147.9	4935	7	30	9.4
696	46177.3	2809	7.1	31	16.4
697	46204.3	4185	40.7	174	11
698	46255.4	6717	5.7	24	6.9
699	46272.2	9273	19.1	81	5
700	46290.7	8082	29.2	124	5.7
701	46323.7	4737	215.4	920	9.8
702	46343.1	4434	30.6	131	10.5
703	46365	4496	12.3	53	10.3
704	46398.1	8144	9.1	39	5.7
705	46413.4	3461	4.6	20	13.4
706	46429.7	3164	6.2	26	14.7
707	46441.2	3158	6.9	29	14.7
708	46474.6	4225	30.3	129	11
709	46485.5	3756	33.8	144	12.4
710	46495.5	3698	47.3	202	12.6
711	46553.3	3429	2.6	11	13.6
712	46587	3321	51.8	221	14
713	46594.1	4284	44.9	192	10.9
714	46627	3768	3.8	16	12.4
715	46651.3	5424	27.8	119	8.6
716	46684.8	4823	3.4	14	9.7
717	46806.9	5009	5	21	9.3
718	46811.2	3224	4.9	21	14.5
719	46823.8	4836	3	13	9.7
720	46897.5	6565	49.9	213	7.1
721	46972.3	4921	10.7	46	9.5
722	46992.7	4187	8.1	34	11.2
723	47024.1	3420	17.1	73	13.8
724	47063.5	4659	8.8	38	10.1
725	47074.7	5155	17.8	76	9.1
726	47109.5	3862	16.9	72	12.2
727	47148.6	8568	14.1	60	5.5
728	47164.1	4842	3	13	9.7
729	47171.8	3445	4.9	21	13.7
730	47198.3	5776	5.8	25	8.2
731	47206.1	5829	4.4	19	8.1
732	47285.6	4299	4.9	21	11
733	47345.1	5678	32.7	139	8.3
734	47358.4	3766	11.5	49	12.6
735	47370.4	6093	9.1	39	7.8
736	47379.6	2528	3.5	15	18.7
737	47392	4104	2.6	11	11.5
738	47461.9	3302	2.4	10	14.4
739	47477.3	4565	8	34	10.4
740	47522.7	10514	4.8	21	4.5
741	47559.3	2604	3.2	14	18.3
742	47580.5	3530	5.1	22	13.5
743	47603.8	4162	22.7	97	11.4
744	47618.4	8214	20.1	86	5.8
745	47646.9	3165	33.9	145	15.1
746	47666.9	4009	15.3	65	11.9
747	47691.2	6937	5.9	25	6.9
748	47701.5	3154	9.1	39	15.1
749	47715.8	4338	7.8	33	11
750	47734.9	4340	43.5	186	11
751	47805.7	3858	14.2	61	12.4
752	47818.2	4528	10.2	44	10.6
753	47838	5826	3.4	15	8.2
754	47876.7	3665	2.9	13	13.1
755	47894.7	3514	2.7	11	13.6
756	47922.4	5287	17.3	74	9.1
757	47930.4	3486	18.7	80	13.8
758	47946.4	5025	35.7	152	9.5
759	47998.9	5169	4.8	21	9.3
760	48010.7	3463	9.3	40	13.9
761	48019.2	6350	7.4	32	7.6
762	48043.7	3313	8.5	36	14.5
763	48130.1	5738	37.1	158	8.4
764	48147.7	6484	16.5	70	7.4
765	48166.7	7371	2.6	11	6.5
766	48211.4	7013	2.7	11	6.9
767	48237.8	3898	105.8	452	12.4
768	48262.4	4778	16.5	71	10.1
769	48285.6	5017	4	17	9.6
770	48291.9	5390	3.6	15	9
771	48306	5386	4	17	9
772	48318	5305	11.8	50	9.1
773	48332.3	7030	3.7	16	6.9
774	48347.8	4280	10.6	45	11.3
775	48364.1	3350	8.8	38	14.4
776	48403.1	5058	24.3	104	9.6
777	48438.8	5871	3	13	8.3
778	48471.9	5892	9.9	42	8.2
779	48498.5	4441	3.2	13	10.9
780	48555	3130	29.6	126	15.5
781	48569.5	3981	21	90	12.2
782	48587.3	3690	57.6	246	13.2
783	48625.3	4736	5.6	24	10.3
784	48645	6012	5.7	24	8.1
785	48695.4	5368	5.1	22	9.1
786	48702.9	4642	7.5	32	10.5
787	48710.1	5904	5.8	25	8.3
788	48793.4	8744	3.7	16	5.6
789	48820.3	4113	5.5	23	11.9
790	48839.4	9997	7.5	32	4.9
791	48855	3717	5.1	22	13.1
792	48865.1	4181	4	17	11.7
793	48874.2	4610	4.3	19	10.6
794	48907.9	5650	2.5	11	8.7
795	48913.3	4251	2.6	11	11.5
796	48946.3	4898	2.9	12	10
797	48973.3	3305	38.9	166	14.8
798	48984.5	3823	54	230	12.8
799	49035	4254	2.6	11	11.5
800	49059.7	7120	31.3	133	6.9
801	49102	4146	30.8	132	11.8
802	49110.9	4767	34.3	147	10.3
803	49146.3	2919	15.5	66	16.8
804	49193.1	5264	16.6	71	9.3
805	49203.4	4827	8.9	38	10.2
806	49252.4	3670	2.5	11	13.4
807	49405.7	4227	11.3	48	11.7
808	49419.6	6158	44.1	188	8
809	49427.6	4219	33.8	144	11.7
810	49445.8	5137	14.4	61	9.6
811	49464.2	3699	43.9	187	13.4
812	49484.3	5141	17.4	74	9.6
813	49504.4	4000	35.8	153	12.4
814	49529.5	3525	47.5	203	14.1
815	49553.8	3794	95	405	13.1
816	49560.6	4240	82.5	352	11.7
817	49575.5	4862	53	226	10.2
818	49581	3928	58.7	250	12.6
819	49602.4	5132	12.6	54	9.7
820	49613.8	4009	8.1	35	12.4
821	49642.8	4225	8.6	37	11.7
822	49659	4137	12.5	53	12
823	49843.1	3622	4.6	20	13.8
824	49922.6	3076	11.1	47	16.2
825	49960.6	4899	4.8	21	10.2
826	49979.8	2546	10.4	44	19.6
827	50023.8	8547	105.6	451	5.9
828	50044.7	7577	15.6	67	6.6
829	50060.8	8075	47.1	201	6.2
830	50082.3	6460	32.7	139	7.8
831	50103.4	4041	7.7	33	12.4
832	50142.3	4947	8.9	38	10.1
833	50150.9	5611	9.3	40	8.9
834	50161.5	3002	11.6	49	16.7
835	50303.3	5331	19.6	84	9.4
836	50321.7	4639	7.8	33	10.8
837	50345.8	3845	25.1	107	13.1
838	50388	3603	143	610	14
839	50432.6	4315	38.7	165	11.7
840	50441.8	5241	33.1	141	9.6
841	50451.3	3312	37.7	161	15.2
842	50463	7216	44.6	190	7
843	50484.4	6899	9.3	40	7.3
844	50515.9	4813	8.2	35	10.5
845	50541.1	4595	23.3	99	11
846	50594.2	4347	18.7	80	11.6
847	50751	4535	7.7	33	11.2
848	50772.6	4435	10	43	11.4
849	50783.6	4265	13.5	58	11.9
850	50823.2	5601	75.8	324	9.1
851	50838	8216	21.9	94	6.2
852	50846.2	4109	26.9	115	12.4
853	50863.2	4187	39.1	167	12.1
854	50885.5	3263	4.8	21	15.6
855	50905.9	5169	6.3	27	9.8
856	50922.8	6191	15.5	66	8.2
857	50951.9	4228	3.2	14	12.1
858	51027.6	3864	4.7	20	13.2
859	51076.5	5666	44.9	192	9
860	51082.1	5307	45.9	196	9.6
861	51092.7	2995	70.2	300	17.1
862	51121.5	3310	41.2	176	15.4
863	51142.6	3491	9.1	39	14.7
864	51153.2	5723	5.1	22	8.9
865	51174.6	3867	13.5	58	13.2
866	51192.6	5319	4.3	19	9.6
867	51202.1	3971	6.3	27	12.9
868	51212.6	4557	3.2	13	11.2
869	51243.9	5324	2.5	11	9.6
870	51255.1	6852	13.4	57	7.5
871	51273.6	7403	87.3	373	6.9
872	51294.9	10128	12.8	55	5.1
873	51325.2	5190	17.7	76	9.9
874	51433.1	3463	5.5	24	14.9
875	51442.3	5318	3.6	15	9.7
876	51494.1	4161	13.9	59	12.4
877	51508	4925	19.3	82	10.5
878	51611.8	3611	41.7	178	14.3
879	51629.3	4172	11.5	49	12.4
880	51650.1	4547	23.4	100	11.4
881	51713.2	8343	43.2	184	6.2
882	51733.3	4164	45	192	12.4
883	51738.3	5375	47.1	201	9.6
884	51769.7	4128	18.5	79	12.5
885	51781.6	4628	14.8	63	11.2
886	51794.7	4778	3.7	16	10.8
887	51832.1	4435	2.7	12	11.7
888	51866.1	3852	3.8	16	13.5
889	51900.9	7111	6.5	28	7.3
890	51921.3	5769	18.5	79	9
891	51982.3	5438	10.8	46	9.6
892	52018.7	4538	13.8	59	11.5
893	52065	4920	3.2	14	10.6
894	52072.8	5410	3	13	9.6
895	52105.6	3649	5	21	14.3
896	52120.3	3990	6.1	26	13.1
897	52143.5	3008	5.6	24	17.3
898	52164.6	7713	8	34	6.8
899	52210	4596	4.1	17	11.4
900	52233.5	4002	46.4	198	13.1
901	52257.3	4458	100.7	430	11.7
902	52292.2	4841	8.1	35	10.8
903	52319.5	4896	48.3	206	10.7
904	52356.5	4760	32.2	137	11
905	52398.8	5022	55.2	236	10.4
906	52418.9	4226	8.2	35	12.4
907	52465.2	5232	2.9	13	10
908	52485.1	4919	33.5	143	10.7
909	52503.1	9848	66.1	282	5.3
910	52525.2	8572	10.5	45	6.1
911	52546.7	8222	34.7	148	6.4
912	52567.8	6953	19.2	82	7.6
913	52577.4	3064	24.9	106	17.2
914	52616.1	5251	5.8	25	10
915	52774	3815	2.5	11	13.8
916	52787.2	5716	2.9	12	9.2
917	52828.8	4876	11	47	10.8
918	52852.4	3137	3.5	15	16.9
919	52875.8	4411	7.2	31	12
920	52881.6	6417	7.2	31	8.2
921	52892.6	6994	4.4	19	7.6
922	52903.1	6026	10.2	43	8.8
923	52916.2	4782	36.8	157	11.1
924	52923	5793	26.8	114	9.1
925	52945.9	4964	123.7	528	10.7
926	52955.4	3198	142.1	607	16.6
927	52974.8	3211	90.6	387	16.5
928	52985.3	5464	92.1	393	9.7
929	53000.6	3326	20.6	88	15.9
930	53017	4217	12.6	54	12.6
931	53028.8	4654	12.2	52	11.4
932	53038.1	5934	8.9	38	8.9
933	53060.8	4475	3.3	14	11.9
934	53088.2	3371	7.1	31	15.7
935	53111.6	3306	15.1	64	16.1
936	53127.2	3347	21.2	90	15.9
937	53149.8	8597	21.9	93	6.2
938	53173.9	5142	4.7	20	10.3
939	53182.4	6446	4.3	18	8.3
940	53191.1	4551	6	25	11.7
941	53305.6	6170	3.7	16	8.6
942	53326.9	5086	4.5	19	10.5
943	53385.1	77651	4.8	21	0.7
944	53407.7	4853	3.1	13	11
945	53432.7	3179	6.1	26	16.8
946	53445.3	4583	4	17	11.7
947	53472.9	4016	3.5	15	13.3
948	53489.8	5220	24.6	105	10.2
949	53541.5	3894	2.8	12	13.8
950	53562.4	4376	12.4	53	12.2
951	53577.1	4095	41.1	175	13.1
952	53592.4	5996	50.1	214	8.9
953	53638.2	3439	16.2	69	15.6
954	53648.6	6503	15.2	65	8.3
955	53657	4292	22.4	96	12.5
956	53667.4	4879	11.7	50	11
957	53678.7	3329	13.4	57	16.1
958	53698.9	4768	2.9	12	11.3
959	53723.4	9033	8.8	38	5.9
960	53754.1	5571	19	81	9.6
961	53775.3	9544	8.2	35	5.6
962	53797	8019	4	17	6.7
963	53808.6	5564	3.9	16	9.7
964	53828.3	6707	17.2	73	8
965	53838.2	7009	6.4	27	7.7
966	53870.6	5614	38	162	9.6
967	53913.4	3565	11	47	15.1
968	53948.2	4571	17.2	73	11.8
969	54034.8	4542	54.6	233	11.9
970	54055.2	3931	7	30	13.8
971	54103.9	4078	2.8	12	13.3
972	54122.2	5379	14.1	60	10.1
973	54135.5	6032	10.6	45	9
974	54148.3	5507	17.2	73	9.8
975	54158.5	5145	21.3	91	10.5
976	54164.3	6060	21.6	92	8.9
977	54197.1	3528	3.8	16	15.4
978	54269.4	4944	136.7	583	11
979	54304.6	5176	16.8	72	10.5
980	54314.9	5200	17.8	76	10.4
981	54337.3	3513	4.2	18	15.5
982	54378.9	8668	48	205	6.3
983	54424	6051	26	111	9
984	54447.5	3325	15.4	66	16.4
985	54510.3	7319	2.8	12	7.4
986	54529.1	3660	10.8	46	14.9
987	54629.5	6051	3.3	14	9
988	54633.2	8830	3.2	14	6.2
989	54649.7	4744	13.1	56	11.5
990	54717.5	4422	2.8	12	12.4
991	54744.5	5064	19.9	85	10.8
992	54754.5	6529	19.4	83	8.4
993	54773.9	4687	18.5	79	11.7
994	54811.7	4817	69.3	296	11.4
995	54821.3	4691	57.7	246	11.7
996	54835	5697	24.4	104	9.6
997	54880.2	5702	29.5	126	9.6
998	54943.3	7208	57.2	244	7.6
999	54978.6	4915	9.5	41	11.2
1000	55026.6	9404	25.5	109	5.9
1001	55049.8	8080	18.6	79	6.8
1002	55067.5	4439	48.5	207	12.4
1003	55110.2	4018	2.3	10	13.7
1004	55171.7	3087	41.5	177	17.9
1005	55182.1	6693	31.4	134	8.2
1006	55218.7	5184	5.5	23	10.7
1007	55224.3	4347	5.6	24	12.7
1008	55259.3	3627	34.9	149	15.2
1009	55271	4467	44.3	189	12.4
1010	55285.5	5026	24.9	106	11
1011	55300.4	4035	25.3	108	13.7
1012	55511.1	4960	10.4	45	11.2
1013	55532.1	6178	47.1	201	9
1014	55543.9	5049	65	278	11
1015	55552.3	5822	53.4	228	9.5
1016	55578.4	2870	20.6	88	19.4
1017	55605	5137	11.2	48	10.8
1018	55618.8	3989	8.5	36	13.9
1019	55629.2	5898	6.5	28	9.4
1020	55638.6	4046	2.7	12	13.8
1021	55650.8	6854	2.6	11	8.1
1022	55746.7	3894	6.1	26	14.3
1023	55765.9	5794	2.4	10	9.6
1024	55783	5071	8.5	36	11
1025	55801.8	3382	4.9	21	16.5
1026	55845.4	3545	26.7	114	15.8
1027	55861.8	3688	19.4	83	15.1
1028	55903.6	5198	13.8	59	10.8
1029	55918.8	4548	10.1	43	12.3
1030	55930.3	3319	9.3	40	16.9
1031	55971.3	4479	7.5	32	12.5
1032	55976.1	8142	7.3	31	6.9
1033	55984.2	4492	8	34	12.5
1034	56048.7	3442	16	68	16.3
1035	56078.1	5195	57.7	246	10.8
1036	56092.7	4060	39.4	168	13.8
1037	56120.9	3265	16.8	72	17.2
1038	56147.7	4132	7	30	13.6
1039	56164.9	9583	26	111	5.9
1040	56185.2	4726	2.4	10	11.9
1041	56239.7	5057	7.2	31	11.1
1042	56254	7384	2.8	12	7.6
1043	56276.5	13211	19.3	82	4.3
1044	56287.9	7443	2.6	11	7.6
1045	56300.6	7667	21.4	91	7.3
1046	56326.8	5241	74	316	10.7
1047	56378	4150	11.5	49	13.6
1048	56388.5	4101	10.7	46	13.8
1049	56419.6	5968	4.2	18	9.5
1050	56430.2	3039	5.2	22	18.6
1051	56440.1	8209	4	17	6.9
1052	56449.3	4830	4.8	21	11.7
1053	56465.7	4471	9.2	39	12.6
1054	56480.3	4752	17.1	73	11.9
1055	56499.3	3737	8.5	36	15.1
1056	56512.1	7124	12.5	53	7.9
1057	56550	5019	39.2	167	11.3
1058	56564.2	3777	27.8	119	15
1059	56608.5	3593	9.9	42	15.8
1060	56638.9	5885	70.2	300	9.6
1061	56644.6	3218	63.8	272	17.6
1062	56674.4	5472	2.6	11	10.4
1063	56728.2	5223	3.8	16	10.9
1064	56750.3	3541	10.4	44	16
1065	56761.2	4039	8.2	35	14.1
1066	56771.5	4588	5.5	23	12.4
1067	56802.5	3607	24.7	106	15.7
1068	56841	4426	13.1	56	12.8
1069	56880.5	6954	13.7	58	8.2
1070	56910.7	4971	31.3	134	11.4
1071	56925.2	6560	71	303	8.7
1072	56976.5	3315	6.7	28	17.2
1073	56985.8	4493	7.5	32	12.7
1074	56993.7	5866	6	26	9.7
1075	57014	5924	12.9	55	9.6
1076	57065	4880	3.3	14	11.7
1077	57107.5	4323	2.5	11	13.2
1078	57124.8	4155	5	21	13.8
1079	57133.4	5173	6.7	29	11
1080	57184.6	5086	44	188	11.2
1081	57215.2	5944	3.1	13	9.6
1082	57238.4	4382	18.8	80	13.1
1083	57247.4	5002	28.7	122	11.4
1084	57273	3954	4.5	19	14.5
1085	57316.5	4945	19.6	84	11.6
1086	57342.9	4634	3.8	16	12.4
1087	57351.7	6952	3	13	8.3
1088	57386.3	9582	48.5	207	6
1089	57397.2	5769	17.6	75	9.9
1090	57427	4396	3.8	16	13.1
1091	57447.5	3961	4.2	18	14.5
1092	57486.1	4462	7.1	30	12.9
1093	57504	6377	3.7	16	9
1094	57527.6	7264	4.8	21	7.9
1095	57552.4	7742	3.3	14	7.4
1096	57558.1	8372	2.8	12	6.9
1097	57567.6	3631	4.4	19	15.9
1098	57654.5	3249	29.3	125	17.7
1099	57709.1	4247	13.2	56	13.6
1100	57716.1	7632	10.8	46	7.6
1101	57733.7	3733	5.9	25	15.5
1102	57755.7	5358	14.7	63	10.8
1103	57766.7	6002	10.4	45	9.6
1104	57796.9	8299	14.4	61	7
1105	57818.1	3717	9.9	42	15.6
1106	57883.4	5530	34.8	149	10.5
1107	57896.2	5690	49.1	209	10.2
1108	57911.4	4165	65.7	281	13.9
1109	57949.9	4683	15.9	68	12.4
1110	57962.1	3738	19	81	15.5
1111	57985.3	4439	3.6	15	13.1
1112	58015.4	5274	19.6	84	11
1113	58033.6	5937	29.1	124	9.8
1114	58048.6	6031	10	43	9.6
1115	58056.8	5630	9.4	40	10.3
1116	58083.2	4969	48.5	207	11.7
1117	58093.6	5039	29.6	126	11.5
1118	58102.4	4855	21.3	91	12
1119	58119.4	3251	15.4	66	17.9
1120	58128.1	7434	13.1	56	7.8
1121	58153	6398	4.1	18	9.1
1122	58176.6	5970	10.6	45	9.7
1123	58197.5	3443	4.6	20	16.9
1124	58228.3	5582	49.8	213	10.4
1125	58237.9	5092	62.4	266	11.4
1126	58248	6148	39.7	170	9.5
1127	58263.4	3487	30	128	16.7
1128	58286.1	4710	8	34	12.4
1129	58302.7	5036	29.2	124	11.6
1130	58314.6	3476	21.2	90	16.8
1131	58349.6	4457	4.2	18	13.1
1132	58373.6	4716	2.4	10	12.4
1133	58432	5532	3	13	10.6
1134	58468.2	7673	4.2	18	7.6
1135	58505.4	4486	47.4	202	13
1136	58515.1	5267	36.7	157	11.1
1137	58541.1	4258	66	282	13.8
1138	58546.6	5067	72	307	11.6
1139	58562.5	5114	117.6	502	11.5
1140	58607.8	10154	41	175	5.8
1141	58635.2	2890	4.5	19	20.3
1142	58650.9	3663	5.8	25	16
1143	58665	5353	4.9	21	11
1144	58679.3	7115	5	21	8.2
1145	58701.7	5799	3.9	17	10.1
1146	58711.9	4667	5.8	25	12.6
1147	58746.1	6463	6.7	29	9.1
1148	58753.9	6981	12.4	53	8.4
1149	58779.1	10321	6.8	29	5.7
1150	58790.6	4751	2.8	12	12.4
1151	58801.7	9335	7.4	31	6.3
1152	58832.8	4504	40.7	174	13.1
1153	58844.2	3840	33.6	143	15.3
1154	58897	5052	11.6	50	11.7
1155	58952	6562	23.9	102	9
1156	58996.4	8050	27.4	117	7.3
1157	59031.2	3804	2.8	12	15.5
1158	59070.9	5502	6.9	30	10.7
1159	59123.2	5375	2.5	11	11
1160	59131.8	7167	2.5	10	8.3
1161	59142	4819	4.6	19	12.3
1162	59152.2	3564	6	25	16.6
1163	59211.6	4234	9.8	42	14
1164	59223	7179	4.5	19	8.3
1165	59239.3	5385	3.2	14	11
1166	59250.3	5883	7	30	10.1
1167	59268.2	3919	5.8	25	15.1
1168	59279.7	3762	6.4	27	15.8
1169	59296.1	5997	13.3	57	9.9
1170	59307.9	4805	21	90	12.3
1171	59318.3	9266	74.6	318	6.4
1172	59334.4	3870	40.9	174	15.3
1173	59340.5	5971	41.9	179	9.9
1174	59354.8	6474	9.9	42	9.2
1175	59380.9	7055	6	26	8.4
1176	59403.8	5980	42.6	182	9.9
1177	59428.6	5934	9.3	40	10
1178	59435.4	5986	7.9	34	9.9
1179	59452.5	5040	2.6	11	11.8
1180	59504	5602	13.3	57	10.6
1181	59554.8	4314	4.9	21	13.8
1182	59575.9	3332	49.6	212	17.9
1183	59623.4	4049	18.4	79	14.7
1184	59646.6	4169	7.8	33	14.3
1185	59668.9	6055	37.1	158	9.9
1186	59675.3	5425	33.1	141	11
1187	59686.2	5107	30.7	131	11.7
1188	59691.7	4823	30.4	130	12.4
1189	59716.6	3831	23.8	102	15.6
1190	59740	5111	5.9	25	11.7
1191	59753.2	4957	12.2	52	12.1
1192	59760.7	5001	11.3	48	12
1193	59791.2	4951	142	606	12.1
1194	59801.1	4700	97	414	12.7
1195	59828	7392	131.1	560	8.1
1196	59844.8	5255	25.8	110	11.4
1197	59866.4	5122	17.3	74	11.7
1198	59891.5	3982	19.3	82	15
1199	59908.7	5272	11	47	11.4
1200	59930.9	5012	2.5	11	12
1201	59953	4753	2.8	12	12.6
1202	59973.3	3914	10.1	43	15.3
1203	59986.3	5453	7.7	33	11
1204	60005.2	7573	50.8	217	7.9
1205	60028	8012	20	85	7.5
1206	60053.8	6754	5.6	24	8.9
1207	60062.3	5588	6.6	28	10.7
1208	60091.6	4164	2.8	12	14.4
1209	60101	4334	3.9	17	13.9
1210	60135	5467	19.8	84	11
1211	60140.5	4358	19.3	83	13.8
1212	60166.9	5148	7	30	11.7
1213	60178.1	6010	7.9	34	10
1214	60194.6	5237	9.7	41	11.5
1215	60238.3	5659	3.1	13	10.6
1216	60298.3	4292	6.2	26	14
1217	60305.8	5201	5.8	25	11.6
1218	60341.3	3272	13.1	56	18.4
1219	60355.8	4993	6.8	29	12.1
1220	60413.3	3446	3.2	14	17.5
1221	60451.8	6172	11.1	47	9.8
1222	60477.4	3999	3.4	15	15.1
1223	60508.6	4890	7.9	34	12.4
1224	60517.5	4962	6.6	28	12.2
1225	60530.1	5587	3	13	10.8
1226	60556.6	6443	5.9	25	9.4
1227	60573.7	5975	4.3	18	10.1
1228	60580.5	5081	4	17	11.9
1229	60592.6	4873	3.5	15	12.4
1230	60629.4	6663	3	13	9.1
1231	60664.7	4562	42.9	183	13.3
1232	60677.2	6143	84.7	362	9.9
1233	60705.9	4447	136.3	582	13.7
1234	60714	4709	121.4	518	12.9
1235	60723.8	6447	86.8	371	9.4
1236	60775.6	7367	34.5	147	8.3
1237	60798.8	4913	8	34	12.4
1238	60818.6	5204	18.7	80	11.7
1239	60838.7	5500	29.5	126	11.1
1240	60853.9	3848	25.6	109	15.8
1241	60886.1	5210	65.6	280	11.7
1242	60893.1	8052	51.3	219	7.6
1243	60899.9	4729	47.8	204	12.9
1244	60954	4898	23.8	102	12.4
1245	60958.5	5649	24.2	104	10.8
1246	60996.7	4064	85.2	364	15
1247	61049.3	7388	259.6	1108	8.3
1248	61059	4282	193.7	827	14.3
1249	61077.2	5552	23.8	101	11
1250	61089.8	4100	30.8	131	14.9
1251	61128.5	5230	8.2	35	11.7
1252	61183.8	5743	39.9	170	10.7
1253	61210	6359	5	21	9.6
1254	61232	4464	33	141	13.7
1255	61253.1	5593	10.5	45	11
1256	61268.7	5570	2.8	12	11
1257	61279.4	10108	9.7	41	6.1
1258	61303.6	8786	8.8	37	7
1259	61324.5	4990	7.8	34	12.3
1260	61341.5	5164	19.8	85	11.9
1261	61375.9	5499	2.4	10	11.2
1262	61394.9	3541	3.6	15	17.3
1263	61419.2	4963	3.6	15	12.4
1264	61429.8	4061	4.2	18	15.1
1265	61456.6	5208	3.5	15	11.8
1266	61466.6	5941	5.3	23	10.3
1267	61480.7	5082	3.4	14	12.1
1268	61492.3	6431	3.3	14	9.6
1269	61570.4	5268	2.4	10	11.7
1270	61587	7465	3.1	13	8.3
1271	61594.8	4086	4.1	17	15.1
1272	61606	4716	2.9	12	13.1
1273	61620.2	3599	4.4	19	17.1
1274	61646.8	4709	8	34	13.1
1275	61744	5297	3	13	11.7
1276	61756.4	4976	6	26	12.4
1277	61776.5	7488	6.1	26	8.3
1278	61881.6	5714	9	38	10.8
1279	61891.9	5061	8.6	37	12.2
1280	61904.5	5045	11.4	49	12.3
1281	61911.1	5369	8.4	36	11.5
1282	61930.4	4099	9.6	41	15.1
1283	61945.3	4992	7.7	33	12.4
1284	62007.5	5637	14.3	61	11
1285	62016.9	3341	16.9	72	18.6
1286	62038.4	7148	20.7	88	8.7
1287	62065.6	3967	18.2	78	15.6
1288	62091.3	4362	60.1	257	14.2
1289	62103	4468	93.8	400	13.9
1290	62114.6	3660	84.1	359	17
1291	62130.3	4519	73.2	313	13.8
1292	62137.7	7532	71.5	305	8.3
1293	62159.1	4759	152.4	651	13.1
1294	62219.7	3017	279.3	1192	20.6
1295	62229.8	7543	256.8	1096	8.3
1296	62236.5	5940	282.3	1205	10.5
1297	62255.2	5031	153	653	12.4
1298	62269.9	5559	275	1174	11.2
1299	62286.3	6728	193.2	825	9.3
1300	62302.2	5331	297.5	1270	11.7
1301	62310	5339	292.4	1248	11.7
1302	62327.4	3646	67.4	287	17.1
1303	62359.7	6343	563.3	2404	9.8
1304	62403.1	2742	88.5	378	22.8
1305	62421.8	3867	69.8	298	16.1
1306	62443.5	4150	19.7	84	15
1307	62456.6	7570	13.4	57	8.3
1308	62486	3197	64.1	274	19.5
1309	62504.9	5302	71.5	305	11.8
1310	62529.9	8142	150.7	643	7.7
1311	62556.1	7396	16.9	72	8.5
1312	62580.1	4651	64.6	276	13.5
1313	62631.5	5871	4.9	21	10.7
1314	62642.3	3254	6.6	28	19.3
1315	62660.4	4371	8.3	35	14.3
1316	62671.6	5001	9.6	41	12.5
1317	62723	8213	4.5	19	7.6
1318	62829.7	5939	4.2	18	10.6
1319	62932.6	4501	4.8	20	14
1320	62943.3	5239	3.8	16	12
1321	62954.6	6037	3.2	14	10.4
1322	63392.9	4247	6.5	28	14.9
1323	63411.2	3846	8.4	36	16.5
1324	63440.3	4069	32.9	141	15.6
1325	63481.8	5432	143.6	613	11.7
1326	63491.7	5345	194.6	831	11.9
1327	63500.6	5131	153.8	656	12.4
1328	63540.8	4201	1211.4	5170	15.1
1329	63566.5	5103	378	1614	12.5
1330	63587.4	5781	299.6	1279	11
1331	63597.3	5782	295.4	1261	11
1332	63609.1	5442	377.5	1611	11.7
1333	63637.5	7714	212	905	8.3
1334	63645.1	3857	230.3	983	16.5
1335	63692.3	4876	70.2	300	13.1
1336	63703.5	4212	101.3	432	15.1
1337	63733.7	6250	133.5	570	10.2
1338	63747.4	5795	108.6	464	11
1339	63752.5	6654	112.3	479	9.6
1340	63780.1	10060	50.8	217	6.3
1341	63793.2	5799	4.5	19	11
1342	63806.1	7852	13.2	56	8.1
1343	63835.3	3994	111.8	477	16
1344	63882	9520	50.1	214	6.7
1345	63895.6	4879	136.3	582	13.1
1346	63941.5	6186	11.2	48	10.3
1347	63945.5	6990	11	47	9.1
1348	63996.7	5818	3	13	11
1349	64009	3475	2.9	12	18.4
1350	64070.3	3325	99	422	19.3
1351	64138.4	4475	9.1	39	14.3
1352	64204.5	4870	10.7	46	13.2
1353	64253.3	4556	12.6	54	14.1
1354	64290.6	5845	2.7	11	11
1355	64316.4	4841	42.4	181	13.3
1356	64360.1	4303	2.3	10	15
1357	64713.1	8758	12.6	54	7.4
1358	64730.8	6046	16.9	72	10.7
1359	64747.2	7244	5.1	22	8.9
1360	64772.7	5315	33	141	12.2
1361	64787.9	4487	29	124	14.4
1362	64809.4	5796	36.1	154	11.2
1363	64834.1	7254	26.3	112	8.9
1364	64857.1	3849	98.7	421	16.9
1365	64868.5	4966	109.7	468	13.1
1366	64881.5	4171	155.6	664	15.6
1367	64890.3	5542	120.9	516	11.7
1368	64911.3	4721	54.4	232	13.8
1369	64934.3	4003	81.5	348	16.2
1370	64951.8	5018	108.8	464	12.9
1371	64974.3	5094	215.8	921	12.8
1372	65004.8	7559	113.9	486	8.6
1373	65016.2	7881	53.4	228	8.3
1374	65020.8	7881	57.2	244	8.3
1375	65030.8	8993	119.4	510	7.2
1376	65057.2	7569	309.2	1320	8.6
1377	65109.1	5399	53.8	230	12.1
1378	65127.1	4359	74.6	318	14.9
1379	65154.6	2506	46.5	199	26
1380	65165.2	3791	51.5	220	17.2
1381	65179.9	4022	42.2	180	16.2
1382	65193	5497	21.5	92	11.9
1383	65206.2	6486	11.4	49	10.1
1384	65218.8	3786	4.6	20	17.2
1385	65230.6	6777	2.9	12	9.6
1386	65254.1	4354	7.4	32	15
1387	65262	6245	5.7	24	10.5
1388	65275.8	5585	2.8	12	11.7
1389	65283.8	5586	2.8	12	11.7
1390	65304.4	4645	3.2	14	14.1
1391	65315.5	3800	2.4	10	17.2
1392	65446.5	6297	3.1	13	10.4
1393	65456.7	5439	4.2	18	12
1394	65463	6801	4.2	18	9.6
1395	65580.8	6174	2.8	12	10.6
1396	65591	4109	4	17	16
1397	65603.3	7193	6.4	27	9.1
1398	65629.9	6299	2.3	10	10.4
1399	65656.5	8301	85.2	364	7.9
1400	65668.7	5619	18.9	81	11.7
1401	65684.8	4046	28.5	122	16.2
1402	65696	3982	29.6	126	16.5
1403	65704.6	6826	25.8	110	9.6
1404	65721.4	5374	50.7	216	12.2
1405	65737.6	3845	235.1	1004	17.1
1406	65759.5	4348	148.8	635	15.1
1407	65767.6	5035	168.3	718	13.1
1408	65774.2	8109	156.8	669	8.1
1409	65794.8	5981	184.4	787	11
1410	65805.5	3829	183.9	785	17.2
1411	65829.2	5040	354.2	1512	13.1
1412	65844.4	2682	377.4	1611	24.6
1413	65861.3	3590	315.4	1346	18.3
1414	65876.5	3787	319	1361	17.4
1415	65888.7	3808	284.5	1214	17.3
1416	65933.5	7847	144.8	618	8.4
1417	65942.7	5995	67.1	286	11
1418	65982.5	3445	12	51	19.2
1419	66020.6	5044	16.7	71	13.1
1420	66033.9	6712	35.7	152	9.8
1421	66203.1	6018	97.4	416	11
1422	66364	6497	2.5	11	10.2
1423	66501.3	6909	8.2	35	9.6
1424	66512.7	4116	7.1	30	16.2
1425	66534.3	5377	15	64	12.4
1426	66561.5	3586	35.2	150	18.6
1427	66569.6	10759	32.6	139	6.2
1428	66603.6	8807	86.3	368	7.6
1429	66647.7	5386	235	1003	12.4
1430	66688.2	2979	111.3	475	22.4
1431	66707.1	4410	74.1	316	15.1
1432	66726	5018	169.1	722	13.3
1433	66758.2	5395	40.9	175	12.4
1434	66768	7289	33.3	142	9.2
1435	66779.5	4106	55.8	238	16.3
1436	66790.3	4079	73	311	16.4
1437	66800	4193	65.5	279	15.9
1438	66842.5	4128	96	410	16.2
1439	66888.1	3834	43	184	17.4
1440	66905.5	6810	16.7	71	9.8
1441	66923.3	6911	26.2	112	9.7
1442	66933.2	7462	34.7	148	9
1443	67374	5721	81.7	349	11.8
1444	67399.5	3631	79	337	18.6
1445	67413.6	4913	133.9	572	13.7
1446	67448.6	5468	147.3	629	12.3
1447	67457.4	4460	158	675	15.1
1448	67472.5	6134	132.4	565	11
1449	67504.9	5493	505.8	2159	12.3
1450	67521.8	5456	298.9	1276	12.4
1451	67532	7032	378.6	1616	9.6
1452	67542	5779	191.5	817	11.7
1453	67551.2	6141	188.2	803	11
1454	67559.8	5585	223.2	953	12.1
1455	67579.8	5174	213.6	912	13.1
1456	67602.1	4470	113.7	485	15.1
1457	67615.4	5161	166.1	709	13.1
1458	67622.8	7026	156	666	9.6
1459	67630.7	5150	147.1	628	13.1
1460	67643.1	5788	93.8	401	11.7
1461	67657.4	8201	65.1	278	8.3
1462	67691.7	6205	222.1	948	10.9
1463	67712.3	4380	89.7	383	15.5
1464	67730.1	5795	34.4	147	11.7
1465	67765	4425	60	256	15.3
1466	67775.4	5545	40.5	173	12.2
1467	67811.3	6165	8.6	37	11
1468	67815.7	7588	8.4	36	8.9
1469	67835.1	5482	20.3	87	12.4
1470	67861.7	8973	12.3	53	7.6
1471	67880.1	5197	31.8	136	13.1
1472	67887.5	5486	28	119	12.4
1473	68083.6	4543	10.6	45	15
1474	68096.8	4785	6.4	27	14.2
1475	68129.3	4673	10.6	45	14.6
1476	68156	7200	23.1	98	9.5
1477	68185.3	6635	24	102	10.3
1478	68193	9017	18.6	80	7.6
1479	68204.9	4134	24.4	104	16.5
1480	68230.7	4936	24.1	103	13.8
1481	68242.5	4098	39.2	167	16.7
1482	68256.1	4964	32.2	138	13.8
1483	68270.4	3972	35.9	153	17.2
1484	68292.3	4128	27.9	119	16.5
1485	68303.8	7097	20	85	9.6
1486	68312.9	4968	24.4	104	13.8
1487	68324.9	4141	28.5	122	16.5
1488	68338.1	4270	17.7	76	16
1489	68349.3	5313	18.1	77	12.9
1490	68361.2	4972	14.4	62	13.8
1491	68375.3	8718	47.3	202	7.8
1492	68385.6	8289	22.7	97	8.3
1493	68396.5	5042	32.9	140	13.6
1494	68408.3	5525	27.3	116	12.4
1495	68421.6	4034	18.2	77	17
1496	68442.5	6360	23.2	99	10.8
1497	68460.7	4191	15.9	68	16.3
1498	68471.8	8300	10.9	47	8.3
1499	68478.7	8300	11.5	49	8.3
1500	68496.2	6227	6.9	29	11
1501	68511.8	5536	9.9	42	12.4
1502	68531.2	4227	21	90	16.2
1503	68544.1	4537	10	43	15.1
1504	68591.8	5869	2.7	12	11.7
1505	68626.7	3977	5.1	22	17.3
1506	68643.1	5291	4.9	21	13
1507	68654.2	6008	2.4	10	11.4
1508	68783.5	11662	5.3	23	5.9
1509	68811.1	11224	27.5	117	6.1
1510	68829.7	6790	80.8	345	10.1
1511	68841	3861	98.6	421	17.8
1512	68853.7	8346	64.8	277	8.3
1513	68912.9	4337	11.4	49	15.9
1514	68934.4	6737	16.8	72	10.2
1515	68967.3	5901	83	354	11.7
1516	68977.3	4560	95.7	408	15.1
1517	69026.3	5284	71.5	305	13.1
1518	69045	4401	48.5	207	15.7
1519	69078	6054	76	324	11.4
1520	69140.3	4850	79.7	340	14.3
1521	69150.1	4244	101	431	16.3
1522	69175.1	3594	31.4	134	19.3
1523	69196	5259	78.1	333	13.2
1524	69207.7	4576	63	269	15.1
1525	69249.5	10073	3.9	16	6.9
1526	69284.9	5646	57.5	245	12.3
1527	69305.7	4200	21.3	91	16.5
1528	69318	6302	17.8	76	11
1529	69345.4	5043	15.2	65	13.8
1530	69356	3736	17.9	76	18.6
1531	69379.3	5615	2.9	13	12.4
1532	69409.6	8048	15.1	65	8.6
1533	69422.8	4937	41.4	177	14.1
1534	69435.2	5742	44.6	190	12.1
1535	69462.4	5613	2.7	11	12.4
1536	69469.8	5052	2.6	11	13.8
1537	69498	6253	4.5	19	11.1
1538	69516	4644	7.6	32	15
1539	69525.4	7223	6.1	26	9.6
1540	69555	7125	15.4	66	9.8
1541	69597.2	8555	65	277	8.1
1542	69609	4750	25.8	110	14.7
1543	69631.4	5331	8.5	36	13.1
1544	69641.1	5239	10.4	44	13.3
1545	69668.3	5067	29.9	128	13.8
1546	69679.6	3319	26.7	114	21
1547	69698.7	4224	19.5	83	16.5
1548	69713.2	5070	14.5	62	13.8
1549	69728.5	6339	14	60	11
1550	69757.8	4228	68.5	292	16.5
1551	69769.7	4845	79.1	338	14.4
1552	69808.8	4990	22.7	97	14
1553	69818.3	101554	12.4	53	0.7
1554	69822.4	11284	12.5	53	6.2
1555	69832.4	4063	15	64	17.2
1556	69877	4442	38.9	166	15.7
1557	69893.9	4169	65.9	281	16.8
1558	69938.3	4606	3.2	14	15.2
1559	69952.5	5493	4.7	20	12.7
1560	69964.2	9135	13.8	59	7.7
1561	69978.6	4237	9.2	39	16.5
1562	69990.7	3960	6.2	26	17.7
1563	70004.7	6279	5.3	23	11.1
1564	70023.5	9259	3.1	13	7.6
1565	70034.1	6255	8	34	11.2
1566	70047.7	6368	5.9	25	11
1567	70060.8	4590	10.9	47	15.3
1568	70072.9	7280	4.4	19	9.6
1569	70087.3	3613	6.7	28	19.4
1570	70110.8	5999	19.2	82	11.7
1571	70153	5802	139.4	595	12.1
1572	70175.4	7308	34.1	146	9.6
1573	70205.9	7294	6.4	27	9.6
1574	70220.1	3783	9.6	41	18.6
1575	70229.4	5193	12.7	54	13.5
1576	70247.1	5677	3.9	17	12.4
1577	70258.1	5209	3.5	15	13.5
1578	70275.3	3407	3.6	15	20.6
1579	70283.6	4647	3.5	15	15.1
1580	70297.7	4770	2.9	12	14.7
1581	70352.2	3812	8.8	37	18.5
1582	70381.6	4841	5.1	22	14.5
1583	70452.1	6839	38.6	165	10.3
1584	70460.9	4450	43.6	186	15.8
1585	70487.9	5396	13	55	13.1
1586	70501.5	4123	21.3	91	17.1
1587	70510	5794	20.9	89	12.2
1588	70526	3946	12.5	53	17.9
1589	70539.9	5777	13.9	59	12.2
1590	70553.9	4146	33.1	141	17
1591	70565.7	4687	26.6	113	15.1
1592	70582.3	5165	24.8	106	13.7
1593	70598.6	3612	52.4	223	19.5
1594	70611.3	4669	61.6	263	15.1
1595	70629.6	6731	35.4	151	10.5
1596	70641.1	8563	17.3	74	8.3
1597	70651.2	6455	28.6	122	10.9
1598	70659.4	5302	43	184	13.3
1599	70688.3	4473	10.6	45	15.8
1600	70706.9	7223	24.5	105	9.8
1601	70716.4	3909	34.8	149	18.1
1602	70746.8	4596	20.2	86	15.4
1603	70763.2	3637	33.9	145	19.5
1604	70797.4	5595	25	107	12.7
1605	70816.1	8797	39.1	167	8.1
1606	70828.9	4832	7.4	31	14.7
1607	70847.7	4313	4.2	18	16.4
1608	70910.4	6428	17.7	75	11
1609	70922.2	5429	18.1	77	13.1
1610	70941	4690	17.3	74	15.1
1611	70951.6	6880	17.4	74	10.3
1612	71005.1	6455	68.5	292	11
1613	71016.2	7076	159.5	681	10
1614	71053.4	4925	24.9	106	14.4
1615	71108.6	6189	27.1	115	11.5
1616	71141.8	6371	5.3	23	11.2
1617	71154.4	3354	7.9	34	21.2
1618	71170.3	4313	9.1	39	16.5
1619	71183.8	6192	17.7	76	11.5
1620	71216	5755	5.3	23	12.4
1621	71240	4464	17.1	73	16
1622	71255.9	8321	16.9	72	8.6
1623	71283.9	10974	36.5	156	6.5
1624	71314.3	7267	14.8	63	9.8
1625	71336.4	4348	48.7	208	16.4
1626	71348.7	5674	41.7	178	12.6
1627	71365.6	4300	32.4	138	16.6
1628	71382.3	6108	15.8	67	11.7
1629	71406	6110	39.5	169	11.7
1630	71416.6	6073	33.6	144	11.8
1631	71437.4	6927	13.7	58	10.3
1632	71465	6240	58.8	251	11.5
1633	71475.2	4726	76.8	328	15.1
1634	71485.8	7191	176.7	754	9.9
1635	71502.4	5267	62.1	265	13.6
1636	71514.6	4803	40.5	173	14.9
1637	71533.3	5704	30.9	132	12.5
1638	71573.7	5479	9.7	41	13.1
1639	71613.3	6127	12.3	52	11.7
1640	71622.8	5483	12.6	54	13.1
1641	71633.8	4296	14	60	16.7
1642	71699	4442	17.2	74	16.1
1643	71709.1	4804	18.7	80	14.9
1644	71722.2	5147	13.2	57	13.9
1645	71760.4	5766	14.8	63	12.4
1646	71772.4	4367	18.1	77	16.4
1647	71794.1	7459	25	107	9.6
1648	71802.4	5802	22.6	96	12.4
1649	71816.6	5171	32.2	137	13.9
1650	71826.9	4975	34.3	146	14.4
1651	71883.4	6721	7.7	33	10.7
1652	71909.4	7240	55.3	236	9.9
1653	71940.1	6924	4.5	19	10.4
1654	71946.9	5814	4.9	21	12.4
1655	71967.1	5029	7.6	33	14.3
1656	71996.7	3862	10.7	46	18.6
1657	72013	3791	14	60	19
1658	72038.2	11882	100.5	429	6.1
1659	72057.7	4448	35.3	150	16.2
1660	72075.6	5577	40	171	12.9
1661	72131.6	3825	5.4	23	18.9
1662	72146.3	7496	3.3	14	9.6
1663	72158.7	5326	8.5	36	13.5
1664	72200.3	5527	72.1	308	13.1
1665	72208.5	4274	80.7	344	16.9
1666	72239.7	5530	20.4	87	13.1
1667	72247.1	4468	17.1	73	16.2
1668	72262.8	4532	22.7	97	15.9
1669	72300.7	6049	4.5	19	12
1670	72332.2	6304	12.8	55	11.5
1671	72359.1	5182	35.2	150	14
1672	72369.8	4785	28	120	15.1
1673	72391.6	5086	16.7	71	14.2
1674	72405.5	5334	8.2	35	13.6
1675	72419.1	4108	8.3	36	17.6
1676	72437	3483	12.4	53	20.8
1677	72453.2	4053	10.4	45	17.9
1678	72473.8	5020	7.7	33	14.4
1679	72505.8	7234	5.9	25	10
1680	72517.7	4219	4.1	17	17.2
1681	72534.5	8803	9.6	41	8.2
1682	72548.3	4797	4.4	19	15.1
1683	72563.4	9369	16	68	7.7
1684	72574	6598	7.4	32	11
1685	72584.9	5279	7.8	33	13.8
1686	72621.4	4235	40.5	173	17.1
1687	72658.1	6388	25.2	108	11.4
1688	72669.4	5362	12.2	52	13.6
1689	72692.1	4907	15.7	67	14.8
1690	72705.1	4605	10.9	47	15.8
1691	72758.5	5478	12	51	13.3
1692	72799.9	5555	96.6	412	13.1
1693	72808.7	5796	105.9	452	12.6
1694	72837.5	6284	51.3	219	11.6
1695	72880.7	5863	39.1	167	12.4
1696	72915	106058	5.9	25	0.7
1697	72939.2	8841	28.1	120	8.3
1698	72954.7	5360	22.7	97	13.6
1699	72966.6	6274	17.1	73	11.6
1700	72990.4	5588	13.7	59	13.1
1701	73005.6	8702	24.2	103	8.4
1702	73020.2	5590	10.3	44	13.1
1703	73029.7	3974	12.5	53	18.4
1704	73075.2	4252	4.1	18	17.2
1705	73085.4	3782	3.8	16	19.3
1706	73104.4	5540	4.2	18	13.2
1707	73133.3	7931	48.9	209	9.2
1708	73145	3340	61.2	261	21.9
1709	73160.2	6666	82.6	353	11
1710	73171.3	7641	39.7	170	9.6
1711	73189.6	5603	9.6	41	13.1
1712	73201.9	5994	16	68	12.2
1713	73222.2	5325	8	34	13.8
1714	73258.9	10219	9.1	39	7.2
1715	73281.9	6908	20.9	89	10.6
1716	73307.8	7496	96.4	411	9.8
1717	73342	5927	9.2	39	12.4
1718	73356.3	3377	9.6	41	21.7
1719	73373.1	7110	5.3	23	10.3
1720	73432.6	4596	69.1	295	16
1721	73445.8	5774	41.2	176	12.7
1722	73479	7224	74.3	317	10.2
1723	73494.9	3397	129.8	554	21.6
1724	73507.4	4987	142.8	610	14.7
1725	73519.6	4180	100.7	430	17.6
1726	73547.2	6686	55.5	237	11
1727	73567.3	3963	32.9	140	18.6
1728	73581.9	4300	31.4	134	17.1
1729	73610.9	10707	14.7	63	6.9
1730	73627.7	8479	32.1	137	8.7
1731	73633.4	4873	32.9	140	15.1
1732	73664.4	5639	12.4	53	13.1
1733	73688.1	4739	12	51	15.6
1734	73704.1	4431	20.6	88	16.6
1735	73712.2	4771	27.5	117	15.5
1736	73745.1	6704	12.3	53	11
1737	73755.7	6367	21.7	92	11.6
1738	73786.1	8634	65.7	280	8.5
1739	73806.5	5650	7.7	33	13.1
1740	73814.2	7989	8.9	38	9.2
1741	73843	4561	18.5	79	16.2
1742	73903.5	4702	4.3	18	15.7
1743	73915.6	9774	2.6	11	7.6
1744	73926.7	4870	3.2	14	15.2
1745	73935.6	5660	2.7	12	13.1
1746	73956.2	4654	2.5	11	15.9
1747	73968.5	4138	2.8	12	17.9
1748	73981.7	5371	3.1	13	13.8
1749	74015.2	5578	7.2	31	13.3
1750	74031.7	5299	10.6	45	14
1751	74052.5	6336	13	56	11.7
1752	74063.6	5985	13.8	59	12.4
1753	74074.4	4489	13.6	58	16.5
1754	74083.7	5524	10.2	43	13.4
1755	74134.2	4313	94.8	404	17.2
1756	74155.8	4380	53.9	230	16.9
1757	74185.6	5995	32.8	140	12.4
1758	74211.8	3808	30.3	129	19.5
1759	74228.5	5683	18.6	79	13.1
1760	74240.4	3600	20.4	87	20.6
1761	74257.4	6076	9	39	12.2
1762	74271.5	9821	4.4	19	7.6
1763	74280.5	4911	5	21	15.1
1764	74293	3859	5.8	25	19.3
1765	74333.5	6114	36.9	157	12.2
1766	74362.2	4917	7.4	32	15.1
1767	74380.2	5572	12	51	13.3
1768	74393.7	4509	8.3	35	16.5
1769	74408.4	5211	9.9	42	14.3
1770	74442.4	7203	3.5	15	10.3
1771	74480.2	6588	57.2	244	11.3
1772	74526.9	8093	30.2	129	9.2
1773	74545	5352	55.3	236	13.9
1774	74555.4	6850	31	133	10.9
1775	74577.1	4949	40.1	171	15.1
1776	74591.3	5710	39.8	170	13.1
1777	74613.9	7433	7.7	33	10
1778	74658.6	5235	5	21	14.3
1779	74680.5	4052	14.8	63	18.4
1780	74703.4	4063	7.2	31	18.4
1781	74739.2	6178	119	508	12.1
1782	74766.5	4350	98.6	421	17.2
1783	74789	9065	26.5	113	8.3
1784	74823.8	4271	82.7	353	17.5
1785	74855.7	6049	17.2	74	12.4
1786	74860.9	5843	16.3	69	12.8
1787	74883.1	5460	9.6	41	13.7
1788	74972.4	6415	41.7	178	11.7
1789	75007.3	7807	6	25	9.6
1790	75024.5	6358	28.6	122	11.8
1791	75035.6	9299	65.1	278	8.1
1792	75066.4	7462	16.5	70	10.1
1793	75094.1	3968	43.1	184	18.9
1794	75123.7	6252	8.5	36	12
1795	75176	5372	94.8	404	14
1796	75184.7	6689	83.3	356	11.2
1797	75201.4	6836	37.7	161	11
1798	75223.8	4577	19.9	85	16.4
1799	75247.7	3930	22.1	94	19.1
1800	75256	4517	18.8	80	16.7
1801	75299.7	4060	21.7	93	18.5
1802	75316	5059	15.2	65	14.9
1803	75334.1	4518	13.1	56	16.7
1804	75353.6	6447	5.8	25	11.7
1805	75367.3	9966	5.8	25	7.6
1806	75379.3	3843	9.1	39	19.6
1807	75405.8	3275	21	90	23
1808	75446.9	5404	71.5	305	14
1809	75465.3	4679	71.7	306	16.1
1810	75475.3	5258	52.2	223	14.4
1811	75524.5	4210	20	85	17.9
1812	75587.3	3280	12	51	23
1813	75596.3	4998	13.9	59	15.1
1814	75639.6	3710	23.9	102	20.4
1815	75661.6	8787	42.9	183	8.6
1816	75683.3	6476	12.1	52	11.7
1817	75691.5	5654	12.8	55	13.4
1818	75745.9	4026	15.9	68	18.8
1819	75754.2	4741	19.6	83	16
1820	75764.1	6507	13.1	56	11.6
1821	75800.5	5803	21.1	90	13.1
1822	75813.7	5012	17.6	75	15.1
1823	75866	10032	5.1	22	7.6
1824	75878.4	7231	14.2	61	10.5
1825	75890.9	3213	19.8	85	23.6
1826	75936	4248	9.5	41	17.9
1827	75980.8	3676	50.2	214	20.7
1828	76000.8	4539	77.8	332	16.7
1829	76011.4	3591	84.1	359	21.2
1830	76023	5193	59	252	14.6
1831	76034.6	6573	40.3	172	11.6
1832	76047.5	8999	54.2	231	8.5
1833	76066.3	4805	16	68	15.8
1834	76085.6	5744	13.8	59	13.2
1835	76097.8	6187	10.4	44	12.3
1836	76114.6	5827	4.2	18	13.1
1837	76128.4	4614	3.2	14	16.5
1838	76165.9	4628	31.7	135	16.5
1839	76199	4033	10.7	46	18.9
1840	76236.6	5544	24.3	104	13.8
1841	76255.6	7193	52.6	225	10.6
1842	76286.4	7185	46.4	198	10.6
1843	76316.1	6342	25.1	107	12
1844	76329.3	3518	12.9	55	21.7
1845	76364.5	4406	25.4	108	17.3
1846	76385.3	6680	31	132	11.4
1847	76415.6	5850	6.6	28	13.1
1848	76442.1	6099	27.9	119	12.5
1849	76459.1	4449	10.3	44	17.2
1850	76479.4	7561	31.3	133	10.1
1851	76488.4	5856	39.1	167	13.1
1852	76497.5	6476	37.3	159	11.8
1853	76501.8	4795	37.4	159	16
1854	76522.1	4794	34.2	146	16
1855	76537	4218	60.6	258	18.1
1856	76558.6	7424	18.6	79	10.3
1857	76596.3	6315	4.2	18	12.1
1858	76637.6	5067	23.3	99	15.1
1859	76675.5	12392	3.9	17	6.2
1860	76685	5135	5.2	22	14.9
1861	76716.2	5615	14	60	13.7
1862	76738.6	4293	6	26	17.9
1863	76761.6	6585	17.8	76	11.7
1864	76785.2	3464	41.8	179	22.2
1865	76821.5	111740	12.3	52	0.7
1866	76836.5	4702	15.6	67	16.3
1867	76854.4	6987	11.9	51	11
1868	76867.4	5082	16.3	70	15.1
1869	76880.9	5438	22.5	96	14.1
1870	76898.9	4724	14.1	60	16.3
1871	76912.1	6328	30.9	132	12.2
1872	76922.6	6733	39.5	168	11.4
1873	76944.5	4947	16.2	69	15.6
1874	76974.3	4248	46.4	198	18.1
1875	76996.4	8000	15.2	65	9.6
1876	77007.1	4884	16.9	72	15.8
1877	77061.7	5151	3.7	16	15
1878	77120.7	5342	13.1	56	14.4
1879	77165.6	3716	78.2	334	20.8
1880	77225.8	8023	208.9	891	9.6
1881	77281.9	5372	13.2	56	14.4
1882	77310	6110	6.2	27	12.7
1883	77353.1	5487	11.6	49	14.1
1884	77364.5	7057	6.2	26	11
1885	77391.6	5925	4.5	19	13.1
1886	77443.3	4638	37.7	161	16.7
1887	77475.7	4334	9.3	40	17.9
1888	77504.8	8000	40.7	174	9.7
1889	77536.2	10967	8.2	35	7.1
1890	77568.9	13560	25.2	107	5.7
1891	77595.6	4875	60.8	259	15.9
1892	77640.9	6512	76.4	326	11.9
1893	77659.8	4518	83.4	356	17.2
1894	77674.2	4519	74.5	318	17.2
1895	77706	5382	22.4	96	14.4
1896	77729.3	6090	38.7	165	12.8
1897	77741.7	4351	55.4	237	17.9
1898	77754.8	3764	65.5	279	20.7
1899	77798.1	4665	15	64	16.7
1900	77806.8	6310	10.8	46	12.3
1901	77881	4276	2.5	11	18.2
1902	77933.4	3996	2.6	11	19.5
1903	77990.4	6302	51	218	12.4
1904	78003.2	4729	79.2	338	16.5
1905	78009.9	8105	69.1	295	9.6
1906	78025	4729	97.9	418	16.5
1907	78035.4	4729	110.5	472	16.5
1908	78094.6	4063	147.2	628	19.2
1909	78105.2	5680	140.1	598	13.8
1910	78126.6	7830	30	128	10
1911	78142.3	7560	15.1	64	10.3
1912	78162.3	6044	9.3	40	12.9
1913	78173.9	6317	7	30	12.4
1914	78190.5	4217	10.5	45	18.5
1915	78221.4	7793	24.6	105	10
1916	78238.6	4798	24.6	105	16.3
1917	78247.7	8594	18.4	79	9.1
1918	78267	4940	5.8	25	15.8
1919	78286.6	5788	7.7	33	13.5
1920	78301.8	7165	18.8	80	10.9
1921	78310.7	4381	19.1	81	17.9
1922	78323.2	7120	17.7	75	11
1923	78344.9	4558	12.9	55	17.2
1924	78359.3	5203	21.3	91	15.1
1925	78369.4	4008	26.2	112	19.6
1926	78407.3	4386	5.5	24	17.9
1927	78417.5	5857	6.1	26	13.4
1928	78471.7	3997	72.8	311	19.6
1929	78528.4	5711	11.4	49	13.8
1930	78542.3	4081	15.2	65	19.2
1931	78605.4	6711	32.8	140	11.7
1932	78621.5	6353	13.2	56	12.4
1933	78629.8	6646	11.5	49	11.8
1934	78661.3	5449	21.9	94	14.4
1935	78682.3	3517	17.7	76	22.4
1936	78697.4	5405	21.5	92	14.6
1937	78715.1	5725	6.8	29	13.8
1938	78729.6	3313	10.5	45	23.8
1939	78757.5	7335	26.1	111	10.7
1940	78787.4	10218	17.1	73	7.7
1941	78838.8	6036	83.6	357	13.1
1942	78848.7	4886	90.4	386	16.1
1943	78869.2	6460	54.9	234	12.2
1944	78932.7	4125	19.6	84	19.1
1945	78949.4	4503	18.2	78	17.5
1946	78965.9	5743	17.4	74	13.8
1947	78996.5	4256	7.6	33	18.6
1948	79016.3	8209	7.2	31	9.6
1949	79029.9	7435	14.8	63	10.6
1950	79039.7	3825	15.8	67	20.7
1951	79060	5641	20.8	89	14
1952	79077.1	5013	27.4	117	15.8
1953	79089.9	11489	79.8	340	6.9
1954	79142.3	6282	41.5	177	12.6
1955	79155.8	4549	29.3	125	17.4
1956	79172.6	10469	8.4	36	7.6
1957	79186.8	5759	8.6	37	13.8
1958	79195	7200	7.9	34	11
1959	79210.1	5325	12.7	54	14.9
1960	79221.4	4582	20.3	87	17.3
1961	79242.2	4279	14.5	62	18.5
1962	79258.3	4861	8.5	36	16.3
1963	79273.6	6998	13.1	56	11.3
1964	79282.4	5766	14.6	62	13.8
1965	79302.1	4856	25.9	110	16.3
1966	79328.9	3951	16.1	69	20.1
1967	79350.2	5246	17.4	74	15.1
1968	79364.1	7044	36.7	157	11.3
1969	79381.2	8030	60.5	258	9.9
1970	79413.6	6238	83.8	358	12.7
1971	79429.5	4444	49.2	210	17.9
1972	79445.9	4603	81.2	346	17.3
1973	79459.9	5254	77	329	15.1
1974	79473.1	4553	69.6	297	17.5
1975	79490.6	6423	40.4	172	12.4
1976	79501.9	4130	45.4	194	19.3
1977	79523.1	6088	42.5	182	13.1
1978	79541.8	4920	34.9	149	16.2
1979	79554.9	5535	22.2	95	14.4
1980	79594.9	3927	16.9	72	20.3
1981	79613	4752	24.3	104	16.8
1982	79622.1	8272	19.2	82	9.6
1983	79644.3	5266	17.4	74	15.1
1984	79662.4	4138	21	89	19.3
1985	79681.5	6910	12.5	53	11.5
1986	79723.8	5062	25.1	107	15.8
1987	79733.5	8284	15.9	68	9.6
1988	79773	7252	20	86	11
1989	79781.3	5275	26.1	111	15.1
1990	79796.9	4460	44.2	189	17.9
1991	79810	5771	23.8	101	13.8
1992	79826.2	4866	15.5	66	16.4
1993	79870.4	4503	7.3	31	17.7
1994	79888.9	3181	8.7	37	25.1
1995	79900.9	7264	5.9	25	11
1996	79925.5	7049	4.3	18	11.3
1997	79932.7	4331	5.2	22	18.5
1998	79967.3	5539	11.9	51	14.4
1999	79989	8311	15.7	67	9.6
[truncated: 858 more rows]

## Sheet: 100 um - Protein Peak Assignmen
#	m/z	Res.	S/N	I	FWHM	Assignment		Molecule	Sequence	Mass	Intensity	Relative Intensity [%]		Top Peaks (#)	Relative Intensity [%]	Intensity	Mass	Assignment
1	10004.2	3716	6.5	29	2.7			Ub-L1	AGAFDADPLVVEIAAAGSMKIKIVPAVGGGSPLELEVAPNATVGAVRTKVCAMKKLPPDTTRLTYKGRALKDTETLESLGVADGDKFVLITRTVGGRELASKDPGAFDADPLVVEISEWSHPQFEK	13189.2	0	0		1	100	1852131	33322	BcPAP
2	10093.7	1845	11.1	50	5.5			Ub-L2	AGAFDADPLVVEIAAAGSMKIKIVPAVGGGSPLELEVAPNATVGAVRTKVCAMKKLPPDTTRLTYKGRALKDTETLESLGVADGDKFVLITRTVGGRELASKDAGAFDADPLVVEIAAAGSMKIKIVPAVGGGSPLELEVAPNATVGAVRTKVCAMKKLPPDTTRLTYKGRALKDTETLESLGVADGDKFVLITRTVGGRELASKDPGAFDADPLVVEISEWSHPQFEK	23779.5	0	0		2	27.671	512504	21179.6	Ub-C2
3	10111.5	1439	23.4	105	7			Ub-L3	AGAFDADPLVVEIAAAGSMKIKIVPAVGGGSPLELEVAPNATVGAVRTKVCAMKKLPPDTTRLTYKGRALKDTETLESLGVADGDKFVLITRTVGGRELASKDAGAFDADPLVVEIAAAGSMKIKIVPAVGGGSPLELEVAPNATVGAVRTKVCAMKKLPPDTTRLTYKGRALKDTETLESLGVADGDKFVLITRTVGGRELASKDAGAFDADPLVVEIAAAGSMKIKIVPAVGGGSPLELEVAPNATVGAVRTKVCAMKKLPPDTTRLTYKGRALKDTETLESLGVADGDKFVLITRTVGGRELASKDPGAFDADPLVVEISEWSHPQFEK	34369.8	0	0		3	24.628	456142	31769.5	Ub-C3
4	10189.5	2961	2.6	12	3.4			Ub-L4	AGAFDADPLVVEIAAAGSMKIKIVPAVGGGSPLELEVAPNATVGAVRTKVCAMKKLPPDTTRLTYKGRALKDTETLESLGVADGDKFVLITRTVGGRELASKDAGAFDADPLVVEIAAAGSMKIKIVPAVGGGSPLELEVAPNATVGAVRTKVCAMKKLPPDTTRLTYKGRALKDTETLESLGVADGDKFVLITRTVGGRELASKDAGAFDADPLVVEIAAAGSMKIKIVPAVGGGSPLELEVAPNATVGAVRTKVCAMKKLPPDTTRLTYKGRALKDTETLESLGVADGDKFVLITRTVGGRELASKDAGAFDADPLVVEIAAAGSMKIKIVPAVGGGSPLELEVAPNATVGAVRTKVCAMKKLPPDTTRLTYKGRALKDTETLESLGVADGDKFVLI…	44960.1	0	0		4	11.9406	221155	33344.4	BcPAP+22
5	10567.5	1632	427.5	1915	6.5			Ub-L5	AGAFDADPLVVEIAAAGSMKIKIVPAVGGGSPLELEVAPNATVGAVRTKVCAMKKLPPDTTRLTYKGRALKDTETLESLGVADGDKFVLITRTVGGRELASKDAGAFDADPLVVEIAAAGSMKIKIVPAVGGGSPLELEVAPNATVGAVRTKVCAMKKLPPDTTRLTYKGRALKDTETLESLGVADGDKFVLITRTVGGRELASKDAGAFDADPLVVEIAAAGSMKIKIVPAVGGGSPLELEVAPNATVGAVRTKVCAMKKLPPDTTRLTYKGRALKDTETLESLGVADGDKFVLITRTVGGRELASKDAGAFDADPLVVEIAAAGSMKIKIVPAVGGGSPLELEVAPNATVGAVRTKVCAMKKLPPDTTRLTYKGRALKDTETLESLGVADGDKFVLI…	55550.4	367	0.0336411		5	5.77162	106898	16660.9	deconvolution artefact!
6	10589.7	1616	11835.6	53028	6.6	deconvolution artefact!		Ub-L6	AGAFDADPLVVEIAAAGSMKIKIVPAVGGGSPLELEVAPNATVGAVRTKVCAMKKLPPDTTRLTYKGRALKDTETLESLGVADGDKFVLITRTVGGRELASKDAGAFDADPLVVEIAAAGSMKIKIVPAVGGGSPLELEVAPNATVGAVRTKVCAMKKLPPDTTRLTYKGRALKDTETLESLGVADGDKFVLITRTVGGRELASKDAGAFDADPLVVEIAAAGSMKIKIVPAVGGGSPLELEVAPNATVGAVRTKVCAMKKLPPDTTRLTYKGRALKDTETLESLGVADGDKFVLITRTVGGRELASKDAGAFDADPLVVEIAAAGSMKIKIVPAVGGGSPLELEVAPNATVGAVRTKVCAMKKLPPDTTRLTYKGRALKDTETLESLGVADGDKFVLI…	66140.7	0	0		6	3.39144	62814	33421.4	BcPAP+100
7	10607.2	1343	993.2	4450	7.9			Ub-C1	AGAFDADPLVVEIAAAGSMKIKIVPAVGGGSPLELEVAPNATVGAVRTKVCAMKKLPPDTTRLTYKGRALKDTETLESLGVADGDKFVLITRTVGGRELASKD	10590.3	53028	4.86082		7	3.33654	61797	33379.6	BcPAP+57
8	10625.1	1251	2470.3	11068	8.5			Ub-C2	AGAFDADPLVVEIAAAGSMKIKIVPAVGGGSPLELEVAPNATVGAVRTKVCAMKKLPPDTTRLTYKGRALKDTETLESLGVADGDKFVLITRTVGGRELASKDAGAFDADPLVVEIAAAGSMKIKIVPAVGGGSPLELEVAPNATVGAVRTKVCAMKKLPPDTTRLTYKGRALKDTETLESLGVADGDKFVLITRTVGGRELASKD	21180.6	512504	46.9788		8	2.86308	53028	10589.7	Ub-C1
9	10636.2	2247	580.9	2603	4.7			Ub-C3	AGAFDADPLVVEIAAAGSMKIKIVPAVGGGSPLELEVAPNATVGAVRTKVCAMKKLPPDTTRLTYKGRALKDTETLESLGVADGDKFVLITRTVGGRELASKDAGAFDADPLVVEIAAAGSMKIKIVPAVGGGSPLELEVAPNATVGAVRTKVCAMKKLPPDTTRLTYKGRALKDTETLESLGVADGDKFVLITRTVGGRELASKDAGAFDADPLVVEIAAAGSMKIKIVPAVGGGSPLELEVAPNATVGAVRTKVCAMKKLPPDTTRLTYKGRALKDTETLESLGVADGDKFVLITRTVGGRELASKD	31770.9	456142	41.8124		9	2.80326	51920	21216.4	Ub-C2
10	10649.4	2472	466.8	2091	4.3			Ub-C4	AGAFDADPLVVEIAAAGSMKIKIVPAVGGGSPLELEVAPNATVGAVRTKVCAMKKLPPDTTRLTYKGRALKDTETLESLGVADGDKFVLITRTVGGRELASKDAGAFDADPLVVEIAAAGSMKIKIVPAVGGGSPLELEVAPNATVGAVRTKVCAMKKLPPDTTRLTYKGRALKDTETLESLGVADGDKFVLITRTVGGRELASKDAGAFDADPLVVEIAAAGSMKIKIVPAVGGGSPLELEVAPNATVGAVRTKVCAMKKLPPDTTRLTYKGRALKDTETLESLGVADGDKFVLITRTVGGRELASKDAGAFDADPLVVEIAAAGSMKIKIVPAVGGGSPLELEVAPNATVGAVRTKVCAMKKLPPDTTRLTYKGRALKDTETLESLGVADGDKFVLI…	42361.2	41084	3.76597		10	2.4082	44603	15884.6	deconvolution artefact!
11	10676.5	3060	24.8	111	3.5			Ub-C5	AGAFDADPLVVEIAAAGSMKIKIVPAVGGGSPLELEVAPNATVGAVRTKVCAMKKLPPDTTRLTYKGRALKDTETLESLGVADGDKFVLITRTVGGRELASKDAGAFDADPLVVEIAAAGSMKIKIVPAVGGGSPLELEVAPNATVGAVRTKVCAMKKLPPDTTRLTYKGRALKDTETLESLGVADGDKFVLITRTVGGRELASKDAGAFDADPLVVEIAAAGSMKIKIVPAVGGGSPLELEVAPNATVGAVRTKVCAMKKLPPDTTRLTYKGRALKDTETLESLGVADGDKFVLITRTVGGRELASKDAGAFDADPLVVEIAAAGSMKIKIVPAVGGGSPLELEVAPNATVGAVRTKVCAMKKLPPDTTRLTYKGRALKDTETLESLGVADGDKFVLI…	52951.5	12399	1.13656		11	2.2182	41084	42359.4	Ub-C4
12	10805.7	2066	7.3	33	5.2			Ub-C6	AGAFDADPLVVEIAAAGSMKIKIVPAVGGGSPLELEVAPNATVGAVRTKVCAMKKLPPDTTRLTYKGRALKDTETLESLGVADGDKFVLITRTVGGRELASKDAGAFDADPLVVEIAAAGSMKIKIVPAVGGGSPLELEVAPNATVGAVRTKVCAMKKLPPDTTRLTYKGRALKDTETLESLGVADGDKFVLITRTVGGRELASKDAGAFDADPLVVEIAAAGSMKIKIVPAVGGGSPLELEVAPNATVGAVRTKVCAMKKLPPDTTRLTYKGRALKDTETLESLGVADGDKFVLITRTVGGRELASKDAGAFDADPLVVEIAAAGSMKIKIVPAVGGGSPLELEVAPNATVGAVRTKVCAMKKLPPDTTRLTYKGRALKDTETLESLGVADGDKFVLI…	63541.9	15402	1.41183		12	1.99813	37008	33279.1	BcPAP-43
13	10830.7	1921	32.3	145	5.6									13	1.86375	34519	21278	Ub-C2+100
14	10840	1663	6.4	29	6.5									14	1.76267	32647	33400.7	BcPAP+78
15	10854	1786	25.9	116	6.1									15	1.57327	29139	31805.6	n.d.
16	10858.8	1563	28.6	128	6.9									16	1.42296	26355	33443.9	BcPAP+122
17	11034.1	2504	324.5	1454	4.4									17	1.34164	24849	11107.5	n.d.
18	11087.3	1895	150.3	674	5.8									18	1.31875	24425	21198.3	Ub-C2+22
19	11107.5	1778	5546.1	24849	6.2									19	1.23031	22787	15902.9	n.d.
20	11131.6	1371	425.3	1905	8.1									20	1.18059	21866	44134.6	n.d.
21	11144.1	1488	916	4104	7.5
22	11360.7	1572	9.1	41	7.2
23	11368.5	2664	24.8	111	4.3
24	11379.6	1827	23.8	106	6.2
25	11389.2	1708	17.8	80	6.7
26	11398.5	1612	32.4	145	7.1
27	11413.1	2628	74.2	333	4.3
28	11423.7	1292	45.7	205	8.8
29	11435.2	2269	747.2	3348	5
30	11448.4	1265	15.2	68	9.1
31	11622.3	2540	17.7	79	4.6
32	11645.9	2826	90.2	404	4.1
33	11769.5	2509	21.3	96	4.7
34	11909.6	2456	20.5	92	4.8
35	11950.9	1145	4.2	19	10.4
36	11965.9	2232	4.1	18	5.4
37	12377.1	1738	8.2	37	7.1
38	12415	2142	3.2	14	5.8
39	12431.2	2495	30.3	136	5
40	12456.3	2267	60.3	270	5.5
41	12469.9	1691	28.5	128	7.4
42	12505.5	4258	125.1	560	2.9
43	12516.1	2429	2.5	11	5.2
44	12609.3	1795	3.1	14	7
45	12705.5	1598	42.5	191	8
46	12732.5	1203	11.4	51	10.6
47	12745.3	2685	20.7	93	4.7
48	12779.3	2935	4.6	21	4.4
49	12813.2	2080	4.2	19	6.2
50	12998.9	1368	16.6	75	9.5
51	13013.2	2258	4.4	20	5.8
52	13153.8	1734	3.1	14	7.6
53	13239.1	2374	28.4	127	5.6
54	13486.1	1809	4	18	7.5
55	13665.2	2338	8.7	39	5.8
56	13703.1	2129	158.6	711	6.4
57	13724.7	2813	13.8	62	4.9
58	13768.3	3062	4.3	19	4.5
59	13792.6	2171	16.1	72	6.4
60	13818.7	2403	94.1	422	5.8
61	13977.4	1939	10.5	47	7.2
62	14121.1	1712	66.8	299	8.2
63	14139.8	1234	112.5	504	11.5
64	14157.6	2018	225.2	1009	7
65	14187.2	2104	13.1	59	6.7
66	14291.7	3284	4.6	20	4.4
67	14411.9	2850	4.6	21	5.1
68	14441.2	2591	6.1	27	5.6
69	14456.8	2653	4.6	20	5.4
70	14525.3	1816	7.6	34	8
71	14559	2396	780.6	3497	6.1
72	14575.1	2785	6.9	31	5.2
73	14628.6	2261	5.5	24	6.5
74	14713.6	1687	87.8	393	8.7
75	14725.3	2864	14.8	66	5.1
76	14947.3	2676	6	27	5.6
77	15195.1	2692	30.4	136	5.6
78	15212.6	2390	72.4	324	6.4
79	15240.7	3313	6.4	29	4.6
80	15250.6	3346	11.6	52	4.6
81	15297	2991	10.2	46	5.1
82	15313.1	2306	3.2	14	6.6
83	15445	2374	27.1	122	6.5
84	15498.7	3500	3	13	4.4
85	15530	2044	25.6	115	7.6
86	15862.2	2032	1472.6	6598	7.8
87	15884.6	1926	9955.2	44603	8.2	deconvolution artefact!
88	15902.9	1529	5086	22787	10.4	78575.9
89	15932.8	1690	670.8	3006	9.4
90	15954	3722	9.6	43	4.3
91	15974.5	3561	121.7	545	4.5
92	16013.4	3961	4.4	20	4
93	16184.9	1887	182.4	817	8.6
94	16195.2	1523	491.1	2200	10.6
95	16209.6	1684	204.4	916	9.6
96	16230.2	2156	288.8	1294	7.5
97	16250.9	4005	197.5	885	4.1
98	16257.4	4758	216	968	3.4
99	16276.5	2281	697.7	3126	7.1
100	16300.7	1801	44.7	200	9.1
101	16636.1	1744	691.3	3097	9.5
102	16660.9	2329	23859.1	106898	7.2	deconvolution artefact!
103	16692.6	1491	1952.3	8747	11.2
104	16714.5	1430	1547.3	6933	11.7
105	16719.2	1439	1542.9	6913	11.6
106	17023.9	1545	2.8	13	11
107	17053.3	2138	49	220	8
108	17070.1	1911	34.6	155	8.9
109	17087.1	1657	191.1	856	10.3
110	17115.8	2373	57.4	257	7.2
111	17135	2014	3.4	15	8.5
112	17161.7	2793	10	45	6.1
113	17205.2	2651	45.5	204	6.5
114	17238.7	3491	4.2	19	4.9
115	17423.8	1996	23.5	105	8.7
116	17444.8	1586	51.1	229	11
117	17453	1736	56.5	253	10.1
118	17468	2979	182.9	820	5.9
119	17491.1	2357	46.7	209	7.4
120	17500.5	4848	138.8	622	3.6
121	17508	5862	130.1	583	3
122	17526.3	2339	138.1	619	7.5
123	17538.7	2204	51.6	231	8
124	17650.1	2956	44.3	199	6
125	17661.4	4167	7.5	34	4.2
126	17793.9	3203	32.7	146	5.6
127	17826.7	2613	5.6	25	6.8
128	17956.8	2472	57.8	259	7.3
129	17977.1	2090	4.2	19	8.6
130	18011.4	3349	8.3	37	5.4
131	18251.1	2004	6.2	28	9.1
132	18328.1	1926	2.5	11	9.5
133	18388.1	2984	27.1	121	6.2
134	18510.6	2805	8.2	37	6.6
135	18532	1523	11.7	53	12.2
136	18602.6	3360	5.5	25	5.5
137	18620.6	2635	52.7	236	7.1
138	18691.2	1950	39.2	176	9.6
139	18759	5351	2.5	11	3.5
140	18773.5	4163	170.7	765	4.5
141	18794.6	3452	33.2	149	5.4
142	18915.5	2599	2.7	12	7.3
143	18923.7	2362	4	18	8
144	18934.1	2620	4.9	22	7.2
145	19130.9	3472	2.4	11	5.5
146	19343.3	3754	35.5	159	5.2
147	19360.9	2792	5.9	26	6.9
148	19375.5	4371	16.8	75	4.4
149	19397.8	3532	3.8	17	5.5
150	19653.9	2019	9.6	43	9.7
151	19662.5	2593	6.2	28	7.6
152	19772.3	2986	19.7	88	6.6
153	19785.5	2462	23.9	107	8
154	19802.3	2136	31.3	140	9.3
155	19816	1803	43	193	11
156	19826.6	3096	104.7	469	6.4
157	19835.3	1699	155.5	697	11.7
158	19861.7	2163	205.9	922	9.2
159	19932.5	1996	19.9	89	10
160	20001.5	5367	484	2168	3.7
161	20008.7	6173	365.6	1638	3.2
162	20017.2	5809	17.5	79	3.4
163	20024.3	2997	6.1	27	6.7
164	20151.1	3544	2.7	12	5.7
165	20167.8	2218	4.4	20	9.1
166	20175.2	3068	2.9	13	6.6
167	20185.2	5126	2.6	12	3.9
168	20216.6	2777	2.8	12	7.3
169	20330.9	2915	3.4	15	7
170	20448.1	3825	5.3	24	5.3
171	20717.9	1844	29.2	131	11.2
172	21133.6	3100	6.9	31	6.8
173	21148.6	3968	24.9	112	5.3
174	21162.5	2670	875	3921	7.9
175	21179.6	2323	114388	512504	9.1
176	21198.3	1898	5451.5	24425	11.2	84224.1
177	21216.4	2070	11588.2	51920	10.2
178	21238.6	2056	1268.7	5684	10.3
179	21251	4181	729.7	3270	5.1
180	21278	2397	7704.6	34519	8.9	119031
181	21298.3	2526	1686.1	7555	8.4
182	21314.1	2463	4.1	18	8.7
183	21358.5	2703	1780.8	7979	7.9
184	21376.6	3794	8.1	36	5.6
185	21418.3	4597	6.4	29	4.7
186	21437.2	4120	149.4	669	5.2
187	21661.9	2317	16.1	72	9.4
188	21682.3	3144	4.8	21	6.9
189	21726.5	2518	2.8	13	8.6
190	21895.8	3021	3	13	7.2
191	21912.2	3108	11.8	53	7
192	21924.8	2346	2.7	12	9.3
193	21962.8	2909	13.1	59	7.6
194	21979.9	3575	8	36	6.1
195	22067.4	3724	2318	10386	5.9
196	22458.4	2420	2.5	11	9.3
197	22471.9	2388	2.7	12	9.4
198	22488.2	2280	28.1	126	9.9
199	22501.6	5710	110.9	497	3.9
200	22510.2	6791	228.4	1023	3.3
201	22519	6468	76.5	343	3.5
202	22538.6	3027	86.8	389	7.4
203	22572.6	2819	8.2	37	8
204	22589.8	3315	5.3	24	6.8
205	22612	3083	5.1	23	7.3
206	22694.9	2291	8.4	37	9.9
207	22707.3	3697	2.4	11	6.1
208	22717.3	4513	6.8	30	5
209	22735.3	3500	2.3	10	6.5
210	22759.2	3052	26	117	7.5
211	22777.1	3476	7.4	33	6.6
212	22798.3	2976	15.1	68	7.7
213	22822.9	3379	2.6	12	6.8
214	22851.7	2641	2.6	11	8.7
215	22876.2	3092	21.4	96	7.4
216	23004.7	3487	54	242	6.6
217	23069.9	2830	4	18	8.2
218	23091.7	2032	3.4	15	11.4
219	23100.6	1977	4	18	11.7
220	23135.8	5450	11.2	50	4.2
221	23144.5	5361	6.3	28	4.3
222	23231	2601	6.7	30	8.9
223	23246	3444	4.4	19	6.8
224	23485.4	2353	41.4	185	10
225	23513.4	2354	10.5	47	10
226	23533.3	3284	73.1	328	7.2
227	23552.9	3089	27.8	124	7.6
228	23567.6	3986	8.1	36	5.9
229	23672.1	3475	82.1	368	6.8
230	23698.9	3763	3.7	17	6.3
231	23804.6	2405	11.2	50	9.9
232	23822.8	1938	2.8	13	12.3
233	23874.5	2772	2.6	12	8.6
234	23902.5	2458	12	54	9.7
235	23918	4054	3.6	16	5.9
236	24007.8	2198	5.2	23	10.9
237	24022.2	3685	10.7	48	6.5
238	24068.2	3262	2.9	13	7.4
239	24139.9	2584	3.3	15	9.3
240	24158	2770	5.3	24	8.7
241	24280.7	3658	3.2	14	6.6
242	24552.5	3222	40.4	181	7.6
243	24574.2	2823	12.8	57	8.7
244	24593.3	2954	5.7	25	8.3
245	24729.2	1968	4.1	19	12.6
246	24749	2805	46.9	210	8.8
247	24776	2589	10	45	9.6
248	24829.6	3944	17.4	78	6.3
249	24862.9	3151	3.4	15	7.9
250	24913.1	3452	10.3	46	7.2
251	25011.1	7261	41.6	186	3.4
252	25021.8	6429	6.1	27	3.9
253	25031.3	2680	5.5	25	9.3
254	25148.6	2739	46	206	9.2
255	25174.9	2253	15.4	69	11.2
256	25194.2	2893	144.5	648	8.7
257	25218.6	2651	50.9	228	9.5
258	25240.5	4854	2.8	13	5.2
259	25390.7	3162	9.7	44	8
260	25402.5	2639	7.3	33	9.6
261	25415.8	2445	19.2	86	10.4
262	25433.1	3427	61.9	277	7.4
263	25451.4	1996	4.8	22	12.8
264	25460.7	4015	7.2	32	6.3
265	25559.1	3413	4.3	19	7.5
266	25626.6	5654	8.4	38	4.5
267	25636.3	6142	7.7	35	4.2
268	25801.2	3481	3.9	17	7.4
269	25863.6	2888	2.6	12	9
270	25884.7	3439	3.3	15	7.5
271	25890.4	3877	2.5	11	6.7
272	25910.2	3554	4.9	22	7.3
273	26009.2	3516	10.4	47	7.4
274	26030.4	3488	2.6	12	7.5
275	26162.3	2895	11.1	50	9
276	26179	1501	5.3	24	17.4
277	26200.9	3851	11.5	51	6.8
278	26242.3	3181	4.9	22	8.3
279	26251.1	5859	7.2	32	4.5
280	26262	8035	3	13	3.3
281	26272.8	6717	8.9	40	3.9
282	26281.6	2236	4.3	19	11.8
283	26290.3	2553	4	18	10.3
284	26308.9	2658	4.9	22	9.9
285	26461.4	4811	39.1	175	5.5
286	26475.3	2197	369	1653	12.1
287	26487	2266	337.5	1512	11.7
288	26508.8	3856	27.7	124	6.9
289	26661.4	3197	2.3	10	8.3
290	26691.1	3734	2.4	11	7.1
291	26801.5	3980	16.9	76	6.7
292	26818.9	3093	30.7	138	8.7
293	26837.4	2379	15.6	70	11.3
294	26869.5	3580	4.5	20	7.5
295	26974.5	3243	14.3	64	8.3
296	27032.2	3257	2.2	10	8.3
297	27065	2544	6.7	30	10.6
298	27083.5	3088	6.6	29	8.8
299	27101.7	3504	3	13	7.7
300	27120.8	3869	3	13	7
301	27154.8	3882	5.7	26	7
302	27189.5	3959	18.5	83	6.9
303	27216.9	2643	10.5	47	10.3
304	27385.7	2797	32.4	145	9.8
305	27400.7	2381	49.7	223	11.5
306	27416.1	2415	28.7	129	11.4
307	27439.4	2611	87.9	394	10.5
308	27467.1	2601	8.7	39	10.6
309	27588.7	3749	6.5	29	7.4
310	27610.2	3560	6.2	28	7.8
311	27636.2	2956	9.6	43	9.3
312	27655.7	3433	9.8	44	8.1
313	27755.5	4062	12.4	56	6.8
314	27765.3	3330	17.5	78	8.3
315	27776.5	4038	27.1	121	6.9
316	27790.6	2892	8.3	37	9.6
317	27871.6	3318	3	14	8.4
318	27919.6	3964	18.9	85	7
319	27953.2	2884	10.2	46	9.7
320	28197.2	2290	2.4	11	12.3
321	28238.3	2511	4.8	21	11.2
322	28255	3077	8.8	40	9.2
323	28269.8	2009	19.7	88	14.1
324	28319.9	3361	3.7	16	8.4
325	28374.3	2179	2.4	11	13
326	28656.2	3277	75.7	339	8.7
327	28673.4	2607	7.1	32	11
328	28694.1	3335	75.2	337	8.6
329	28787	4855	3.1	14	5.9
330	28826	3494	2.3	10	8.3
331	28881.9	2676	29.4	132	10.8
332	28897.6	5327	29.6	132	5.4
333	28907	2615	16.1	72	11.1
334	28936.4	2681	5.6	25	10.8
335	28979.1	2509	42.9	192	11.6
336	28992.4	3103	5.2	23	9.3
337	29010.3	2623	28.6	128	11.1
338	29044.2	2874	66.3	297	10.1
339	29097.4	3687	4.5	20	7.9
340	29117.2	2679	53.9	241	10.9
341	29158.3	3856	18	81	7.6
342	29180.3	2486	2.9	13	11.7
343	29232.9	3601	9.3	42	8.1
344	29258.1	3025	4.9	22	9.7
345	29281.6	4123	4.5	20	7.1
346	29400	6303	15.7	70	4.7
347	29413.1	2834	29.8	134	10.4
348	29423.3	2941	21.4	96	10
349	29449	5012	11.1	50	5.9
350	29653.5	3503	33.3	149	8.5
351	29900.7	2532	3.4	15	11.8
352	30013.7	9021	3.7	17	3.3
353	30069.8	3315	7.5	34	9.1
354	30091	2965	3.3	15	10.1
355	30157.5	3272	4.6	21	9.2
356	30226.5	2769	9.3	42	10.9
357	30241.7	4821	13.8	62	6.3
358	30252	2391	8.9	40	12.7
359	30277.4	4594	14.5	65	6.6
360	30289.4	4901	11.2	50	6.2
361	30308.6	3149	2.6	12	9.6
362	30329.9	3266	15.5	69	9.3
363	30357.1	3207	96.6	433	9.5
364	30385.9	2971	216.9	972	10.2
365	30424.4	3342	331.2	1484	9.1
366	30444.9	3596	157.7	707	8.5
367	30467.9	2462	11.1	50	12.4
368	30482.1	2508	33.3	149	12.2
369	30499.4	3781	138.2	619	8.1
370	30527.9	2906	3.6	16	10.5
371	30543.2	3210	12.3	55	9.5
372	30551.7	2775	13.1	59	11
373	30590.7	4033	37.2	167	7.6
374	30617.7	2248	10.2	46	13.6
375	30638.9	7578	3.7	16	4
376	30673.6	3673	2.4	11	8.4
377	30812.9	2801	2.7	12	11
378	30822.4	2516	4.3	19	12.3
379	30856.2	1966	4	18	15.7
380	30888.4	3188	13.6	61	9.7
381	30997.3	3433	4.9	22	9
382	31045.1	3708	19.7	88	8.4
383	31057.2	3765	14.8	66	8.3
384	31098.9	2715	3.5	16	11.5
385	31118.9	4464	5.3	24	7
386	31147	3592	20.2	91	8.7
387	31655.5	3452	5.1	23	9.2
388	31663.3	3355	5.1	23	9.4
389	31680.9	4323	6	27	7.3
390	31696.9	3581	120.8	541	8.9
391	31724.6	2747	791.2	3545	11.6
392	31751.9	2905	3518.2	15763	10.9	54355.2
393	31769.5	2948	101809	456142	10.8
394	31805.6	1690	6503.7	29139	18.8	100479
395	31828.5	1854	1081.7	4846	17.2
396	31840.2	3048	1063.3	4764	10.4
397	31868.9	3366	2623.2	11753	9.5
398	31887.2	6027	326.8	1464	5.3
399	31904.2	4767	29.6	133	6.7
400	31947.6	5719	359.4	1610	5.6
401	32027.9	5086	79.9	358	6.3
402	32371.7	2431	19.1	86	13.3
403	32401.6	2618	219.4	983	12.4
404	32416.2	3021	440.9	1975	10.7
405	32448.3	2172	1064.9	4771	14.9
406	32475.8	2952	1516.2	6793	11
407	32502	5122	966.9	4332	6.3
408	32514.4	7071	1640.5	7350	4.6
409	32528.1	6520	1541.9	6908	5
410	32541.4	2996	1022.9	4583	10.9
411	32552.6	3293	956.1	4284	9.9
412	32570.2	1562	747.7	3350	20.9
413	32590.9	3263	194.8	873	10
414	32626.3	2966	5.1	23	11
415	33099.8	3384	11.4	51	9.8
416	33218.1	3169	31.7	142	10.5
417	33279.1	2095	8260	37008	15.9
418	33322	2924	413387	1852131	11.4
419	33344.4	1726	49360.7	221155	19.3
420	33379.6	1334	13792.7	61797	25
421	33400.7	1799	7286.7	32647	18.6	112576
422	33421.4	2370	14019.8	62814	14.1
423	33443.9	2267	5882.4	26355	14.8	90879.3
424	33461.4	3354	3275.4	14675	10
425	33481	4463	364.3	1632	7.5
426	33500.3	4317	34.8	156	7.8
427	34048.3	3537	3	13	9.6
428	34078.2	2717	138	618	12.5
429	34101	2548	724.2	3245	13.4
430	34113.9	2099	883.1	3957	16.2
431	34136.1	3547	428.9	1922	9.6
432	34158.1	2941	543.6	2436	11.6
433	34162.1	3549	560	2509	9.6
434	34171	2616	560.3	2510	13.1
435	34179.2	4143	491.9	2204	8.3
436	34197.1	2297	396.4	1776	14.9
437	34200.1	3316	399	1788	10.3
438	34216.1	2765	255.3	1144	12.4
439	34240.7	2876	552.2	2474	11.9
440	34266.6	5099	51.7	232	6.7
441	34272.1	3201	60.8	272	10.7
442	34306.5	2524	167.3	750	13.6
443	34331.1	3567	19.5	87	9.6
444	34359.3	3124	3	13	11
445	34404.5	4170	22	99	8.3
446	34415.9	4153	40.4	181	8.3
447	34808.7	4184	10	45	8.3
448	34851.4	2065	53.6	240	16.9
449	34874.7	3111	304.8	1365	11.2
450	34895.4	2416	133.1	596	14.4
451	34904.4	2550	174.5	782	13.7
452	34917	2673	118	529	13.1
453	34925.6	3415	153.7	689	10.2
454	34943.1	2372	443.5	1987	14.7
455	34966.4	3179	41.2	184	11
456	34981.9	4293	176.9	792	8.1
457	34990.2	3345	219.7	985	10.5
458	35001	6321	54.3	243	5.5
459	35015.9	8504	70.4	316	4.1
460	35029.5	8205	84.1	377	4.3
461	35054.1	3409	115.2	516	10.3
462	35077.8	3362	80.6	361	10.4
463	35118	3322	2.4	11	10.6
464	35175.7	3481	3.1	14	10.1
465	35299	4154	58.6	263	8.5
466	35323.8	4111	2.4	11	8.6
467	35591.4	2778	9.5	43	12.8
468	35627	5864	11	49	6.1
469	35641.6	8444	16.9	76	4.2
470	35655.6	6695	14.6	65	5.3
471	35697.2	2642	11.9	53	13.5
472	35710.4	3174	12.8	57	11.2
473	35732.8	4518	270.5	1212	7.9
474	35758.3	5025	124.2	557	7.1
475	35788	2447	15.2	68	14.6
476	35800.2	2692	8.2	37	13.3
477	35817	3335	24.8	111	10.7
478	35844.3	2910	4.5	20	12.3
479	35868	3229	9.5	43	11.1
480	35897.2	2869	27.4	123	12.5
481	35909.8	2459	63.3	284	14.6
482	35950.9	2501	5.6	25	14.4
483	36024.6	4869	3.1	14	7.4
484	36098.2	3255	27.6	124	11.1
485	36121.4	3501	12.3	55	10.3
486	36137.8	2913	16.4	74	12.4
487	36266.5	9397	4.6	21	3.9
488	36281.6	8378	9.8	44	4.3
489	36303.5	3106	10	45	11.7
490	36441.2	3526	10.3	46	10.3
491	36470.8	3343	8.5	38	10.9
492	36479.3	2428	9.2	41	15
493	36501.6	4739	22.9	102	7.7
494	36551.1	3417	10.5	47	10.7
495	36572.2	3886	36.5	164	9.4
496	36599.4	4979	3.7	17	7.4
497	36651.4	3894	17.5	79	9.4
498	36682.6	4037	9.8	44	9.1
499	36709.4	4418	6.8	30	8.3
500	36744	3817	8.4	38	9.6
501	36776.9	3435	86.5	388	10.7
502	36856	3635	4	18	10.1
503	36876.6	4640	2.9	13	7.9
504	36892.1	7521	3.7	17	4.9
505	36922.1	4163	3.9	17	8.9
506	37033.6	4827	6.3	28	7.7
507	37062.7	2265	31.9	143	16.4
508	37083.3	2300	7.7	34	16.1
509	37109.3	3432	5.6	25	10.8
510	37123.2	3029	11.9	53	12.3
511	37165.9	3861	5.4	24	9.6
512	37201.2	3954	5.8	26	9.4
513	37244.1	3314	51.7	232	11.2
514	37290.1	2809	90.3	404	13.3
515	37363.6	4452	17.2	77	8.4
516	37386.3	3444	26.1	117	10.9
517	37411.2	3882	5.4	24	9.6
518	37503	6998	3.3	15	5.4
519	37517.2	8847	79.4	356	4.2
520	37533.2	6432	7.6	34	5.8
521	37546.8	5276	59.9	268	7.1
522	37589.6	3942	18.6	83	9.5
523	37649.6	4499	4.1	18	8.4
524	37702.1	3259	4.3	19	11.6
525	37759.2	5527	3	13	6.8
526	37827	2673	8.1	36	14.2
527	37847.1	5960	5.4	24	6.4
528	37863.4	5579	6.2	28	6.8
529	37871.9	2925	8.3	37	12.9
530	37944.2	3452	2.4	11	11
531	37952.4	4781	2.6	12	7.9
532	38087.6	5066	12.9	58	7.5
533	38091.2	4800	12.2	55	7.9
534	38113	4450	13.5	61	8.6
535	38126.9	5847	48.5	217	6.5
536	38141.3	5941	7.4	33	6.4
537	38157.9	6701	2.4	11	5.7
538	38178.1	4628	2.3	10	8.3
539	38196.6	3153	10.8	48	12.1
540	38224.8	3614	5.9	27	10.6
541	38259.2	3297	8	36	11.6
542	38338.3	3482	3.2	14	11
543	38386.1	3490	20.4	91	11
544	38447.6	2676	5.7	25	14.4
545	38508.7	2890	3.3	15	13.3
546	38528.9	4453	3.3	15	8.7
547	38582.6	2896	17.3	78	13.3
548	38596.1	2246	17.8	80	17.2
549	38617.7	4681	242.4	1086	8.3
550	38649.5	3514	3	14	11
551	38687.4	3935	21.7	97	9.8
552	38721.6	3963	39.3	176	9.8
553	38749.9	6537	6.2	28	5.9
554	38767.7	9132	3.2	14	4.2
555	38798.5	5316	12.1	54	7.3
556	38827.7	3883	6.4	29	10
557	38842.6	3555	4.5	20	10.9
558	38865.8	3435	3.1	14	11.3
559	38878.8	2972	4.3	19	13.1
560	38989	5702	36.6	164	6.8
561	38994.3	3897	43.9	197	10
562	39007.8	3184	21.4	96	12.3
563	39027.2	3422	11.1	50	11.4
564	39118.5	4742	2.6	12	8.3
565	39154.8	3044	3.4	15	12.9
566	39307.3	3152	25.8	116	12.5
567	39328.5	3999	4.3	19	9.8
568	39377.5	6163	2.7	12	6.4
569	39393.1	7721	15.7	70	5.1
570	39402.3	4154	13.1	58	9.5
571	39407.5	5911	11.4	51	6.7
572	39435.1	3338	2.6	12	11.8
573	39441.4	4098	2.7	12	9.6
574	39456.7	3422	8.6	39	11.5
575	39528.7	4191	29.7	133	9.4
576	39544.2	6575	41.6	186	6
577	39560.1	3836	4.9	22	10.3
578	39569.8	3460	4.7	21	11.4
579	39610.2	3389	5.2	23	11.7
580	39625.2	3764	13.6	61	10.5
581	39650.9	3932	2.4	11	10.1
582	39668.9	3394	8.1	36	11.7
583	39719	4814	38.6	173	8.3
584	39728.5	3343	32.5	146	11.9
585	39770.5	3750	10.3	46	10.6
586	39799.5	2565	11.9	53	15.5
587	39829.5	3199	38.2	171	12.5
588	39857.9	3721	51.2	229	10.7
589	40003	7160	21.6	97	5.6
590	40017.7	8635	41.3	185	4.6
591	40034.7	8250	49.8	223	4.9
592	40051.9	4042	51.8	232	9.9
593	40113.9	3850	4	18	10.4
594	40132.2	2925	2.8	12	13.7
595	40157.2	3592	2.9	13	11.2
596	40185.4	4049	10.1	45	9.9
597	40201.2	4873	2.5	11	8.3
598	40331.5	3169	10.9	49	12.7
599	40434.9	2471	3.5	16	16.4
600	40462.1	3270	11.8	53	12.4
601	40466.3	3815	11.8	53	10.6
602	40659.7	6878	10.7	48	5.9
603	40731	3014	2.7	12	13.5
604	40758.5	5229	3	14	7.8
605	40819	3414	10.6	48	12
606	40849.7	4339	7.3	33	9.4
607	40900.6	6074	4	18	6.7
608	40942	3732	36.2	162	11
609	40973.2	3761	3.2	14	10.9
610	40998.2	2651	21.2	95	15.5
611	41009.5	3509	19.4	87	11.7
612	41029	3788	88.7	397	10.8
613	41042.6	3512	42.4	190	11.7
614	41077.8	3574	142.3	638	11.5
615	41107.4	2491	99.5	446	16.5
616	41149.4	2780	25.3	113	14.8
617	41159.1	3151	25.7	115	13.1
618	41180.9	3091	168.2	753	13.3
619	41217.6	3520	64	287	11.7
620	41252.2	8437	27.3	122	4.9
621	41259.4	6243	11.4	51	6.6
622	41268.6	9193	12	54	4.5
623	41285.4	10032	10.1	45	4.1
624	41302	5707	6.6	30	7.2
625	41375.4	3761	3.5	16	11
626	41393.7	3589	6.8	31	11.5
627	41449.4	3480	91.3	409	11.9
628	41471	3929	13.7	61	10.6
629	41877.5	6210	30.6	137	6.7
630	41894.2	6454	3.3	15	6.5
631	41911.7	6294	2.3	10	6.7
632	41927.2	6128	17	76	6.8
633	42215.2	3858	2.7	12	10.9
634	42264.9	3009	4.7	21	14
635	42296.3	4636	10	45	9.1
636	42324.4	3352	381.9	1711	12.6
637	42359.4	3274	9169.7	41084	12.9
638	42395.3	3496	648	2903	12.1
639	42419.7	3629	220.9	990	11.7
640	42431.2	2805	226.2	1014	15.1
641	42480.1	3724	324	1452	11.4
642	42502.1	4862	106.4	477	8.7
643	42510.1	4554	60.1	269	9.3
644	42518.6	8548	87.3	391	5
645	42555.9	2669	218	977	15.9
646	42597.9	4491	110.4	494	9.5
647	42620.6	3061	17.3	77	13.9
648	42719.1	3939	85.5	383	10.8
649	42756.3	4285	3.5	16	10
650	42815	2862	2.4	11	15
651	42835.8	4466	10.2	46	9.6
652	42875.1	5846	51.3	230	7.3
653	43162.8	8722	3.2	14	4.9
654	43213.8	4347	5.1	23	9.9
655	43323.5	3460	10.6	47	12.5
656	43364.4	2593	2.8	12	16.7
657	43418.1	4891	9.8	44	8.9
658	43453.5	4031	10.3	46	10.8
659	43503.5	4768	5.2	23	9.1
660	43537	4283	6.9	31	10.2
661	43575.2	4660	27.6	124	9.4
662	43598.6	2142	10.7	48	20.4
663	43608.4	2503	12.5	56	17.4
664	43635.9	5289	5.1	23	8.3
665	43647.8	3968	5.3	24	11
666	43669.3	4180	72.6	325	10.4
667	43683.6	4539	35.3	158	9.6
668	43724.9	4548	6.3	28	9.6
669	43732.7	3640	6.2	28	12
670	43752.1	8022	8.8	39	5.5
671	43770.3	9947	57.1	256	4.4
672	43787.4	8949	34.5	155	4.9
673	43805	3705	19.3	86	11.8
674	43815.1	3983	16.6	74	11
675	43820.9	5446	15.3	68	8
676	43847.7	3722	13.9	62	11.8															8.70296
677	43889.1	3986	15.6	70	11
678	43923.9	3199	2.9	13	13.7
679	44068.8	4006	2.7	12	11
680	44134.6	4585	4880.4	21866	9.6	75400
681	44164.7	5840	65.7	294	7.6
682	44178.6	3382	112.8	505	13.1
683	44224.1	4020	8.6	39	11
684	44240.7	3454	22.3	100	12.8
685	44414.1	6580	15.2	68	6.7
686	44431.9	4585	8.5	38	9.7
687	44672.6	3691	4.6	21	12.1
688	44702.5	4494	19.5	87	9.9
689	44723.4	3778	27.8	125	11.8
690	44750.3	4649	8.9	40	9.6
691	44774.7	4251	38.9	174	10.5
692	44820.2	2940	12.6	56	15.2
693	44840.6	3330	30.9	139	13.5
694	44865.6	4079	6.2	28	11
695	44883	3670	2.9	13	12.2
696	44917.2	2921	34	152	15.4
697	44940.9	3840	9.6	43	11.7
698	44980	2328	9.1	41	19.3
699	45002.5	8109	11.1	50	5.5
700	45020.9	9259	51.9	232	4.9
701	45038.2	8786	9.9	45	5.1
702	45074.2	4210	5.5	25	10.7
703	45092.9	2720	13.1	59	16.6
704	45142.6	4728	20.8	93	9.5
705	45178.8	3970	35.9	161	11.4
706	45189.9	6573	14.8	66	6.9
707	45198.8	3460	18.8	84	13.1
708	45224.8	2628	68	305	17.2
709	45252.9	3559	11	49	12.7
710	45281.8	3874	4.2	19	11.7
711	45287.1	5864	4	18	7.7
712	45315.4	3804	2.3	10	11.9
713	45354.8	3306	2.7	12	13.7
714	45384.4	4052	6.8	31	11.2
715	45434.6	5104	3.9	17	8.9
716	45522.7	3812	3.6	16	11.9
717	45557.8	4530	7.9	35	10.1
718	45584.6	3684	23.9	107	12.4
719	45589.7	6631	24	108	6.9
720	45595.7	4737	25.6	115	9.6
721	45629.2	6978	9	40	6.5
722	45645.4	6986	26.4	118	6.5
723	45664.3	7794	9.2	41	5.9
724	45700.7	3620	16.4	74	12.6
725	45722.3	4246	66	296	10.8
726	45751.1	3411	20.5	92	13.4
727	45791.4	4035	2.9	13	11.3
728	45812.8	4011	4.9	22	11.4
729	45824	2916	6	27	15.7
730	45892.2	3708	4.1	19	12.4
731	45899.2	3927	3.6	16	11.7
732	46009.6	4113	9	40	11.2
733	46061.2	5802	4.9	22	7.9
734	46095.1	3983	29.5	132	11.6
735	46144.8	3034	9.7	44	15.2
736	46170.6	3575	14.3	64	12.9
737	46202.1	3234	72.4	324	14.3
738	46261.7	6117	23.7	106	7.6
739	46271	8952	72.1	323	5.2
740	46290	9591	53.1	238	4.8
741	46320.3	4785	256.9	1151	9.7
742	46367.6	4603	9.3	42	10.1
743	46412.7	2825	9.4	42	16.4
744	46442	3555	6.1	28	13.1
745	46473	4225	47	211	11
746	46479.9	5634	49.2	221	8.3
747	46493	4064	105.2	471	11.4
748	46590.6	3841	49.8	223	12.1
749	46647.4	5089	9.4	42	9.2
750	46650.2	4884	9.5	43	9.6
751	46684.3	3597	6.1	27	13
752	46809.5	4250	4.6	20	11
753	46896.2	7252	113.3	507	6.5
754	46934.4	3683	5.1	23	12.7
755	46954.6	5048	9.5	43	9.3
756	46964.1	3595	10.5	47	13.1
757	46972.5	3480	11.4	51	13.5
758	46988.8	3277	19.6	88	14.3
759	46998.2	5259	17.9	80	8.9
760	47018.1	4896	63.5	284	9.6
761	47045.8	4025	20.6	92	11.7
762	47065.4	3203	45.3	203	14.7
763	47074.8	3301	46.4	208	14.3
764	47108.7	4737	78.8	353	9.9
765	47136.7	4307	11.9	53	10.9
766	47148.4	5402	8.6	39	8.7
767	47165.6	2552	7.7	35	18.5
768	47200.6	3558	5.5	25	13.3
769	47285.3	4497	16.2	73	10.5															20.858
770	47342.7	4316	18.6	83	11
771	47357.6	3827	7.7	35	12.4
772	47376.8	4307	2.7	12	11
773	47396.8	3486	2.7	12	13.6
774	47473.4	3753	5	22	12.6
775	47521.5	11381	3.4	15	4.2
776	47582.3	3289	4.5	20	14.5
777	47602.4	4065	22.6	101	11.7
778	47647	3496	23.3	104	13.6
779	47696.4	3651	15.6	70	13.1
780	47712.4	4082	11.3	51	11.7
781	47738.3	4960	39.2	176	9.6
782	47776.1	6317	6	27	7.6
783	47807.8	4364	37.8	169	11
784	47814.4	6015	34.5	155	7.9
785	47825.4	4985	30.4	136	9.6
786	47861.6	5040	4.3	19	9.5
787	47926.5	3740	16.5	74	12.8
788	47940.1	4250	17.6	79	11.3
789	47946.9	6237	13.1	59	7.7
790	48021.2	4988	13.8	62	9.6
791	48038.8	4845	27.4	123	9.9
792	48128.9	6213	33.2	149	7.7
793	48146.3	6828	9.6	43	7.1
794	48205.8	4129	3.4	15	11.7
795	48235.1	5847	95.5	428	8.3
796	48241	5913	99.3	445	8.2
797	48262.6	3343	8.9	40	14.4
798	48283.7	3346	10.2	46	14.4
799	48318.4	3923	26.9	120	12.3
800	48346.4	3701	25.2	113	13.1
801	48355	3994	24	108	12.1
802	48398.9	3118	48.5	217	15.5
803	48420.7	5227	5.5	25	9.3
804	48433	4403	2.9	13	11
805	48440.1	4634	3.3	15	10.5
806	48471.5	4385	3.9	17	11.1
807	48496.1	3871	2.3	10	12.5
808	48555.6	4685	51.9	233	10.4
809	48587.9	70673	48.7	218	0.7
810	48627.4	3929	13.7	61	12.4
811	48636.1	6431	10.4	47	7.6
812	48642.8	4277	11	49	11.4
813	48670	3580	4.8	21	13.6
814	48685.1	4324	5.3	24	11.3
815	48692.2	3219	5.2	23	15.1
816	48700.9	5163	4.3	19	9.4
817	48711	4208	2.7	12	11.6
818	48753.3	8846	2.4	11	5.5
819	48772.3	10699	4.2	19	4.6
820	48791.9	9605	8	36	5.1
821	48800	3736	4	18	13.1
822	48812.6	3944	4.5	20	12.4
823	48820.4	3775	4.9	22	12.9
824	48830	5208	3.9	17	9.4
825	48859.6	3740	5.7	26	13.1
826	48870	6462	4.2	19	7.6
827	48879.2	3981	4.4	20	12.3
828	48942.6	3633	3	13	13.5
829	48975.1	3751	40.4	181	13.1
830	48992.8	3959	23.6	106	12.4
831	49026.4	4032	2.8	13	12.2
832	49059.7	3325	25	112	14.8
833	49107.4	4187	54.8	246	11.7
834	49146.8	3407	60.5	271	14.4
835	49191.8	4739	26.3	118	10.4
836	49399.5	7167	6.2	28	6.9
837	49418.4	5117	60.7	272	9.7
838	49436.9	4794	15.7	70	10.3
839	49458.9	3654	42.8	192	13.5
840	49502.8	3491	100.1	448	14.2
841	49513.1	4001	54.9	246	12.4
842	49523.7	4655	55.6	249	10.6
843	49532.9	3707	56.7	254	13.4
844	49554.1	3308	129.2	579	15
845	49562.1	3668	111.1	498	13.5
846	49574.5	4242	71.2	319	11.7
847	49602.6	6559	20.5	92	7.6
848	49617.3	3128	18.8	84	15.9
849	49642.5	4793	44.7	200	10.4
850	49657.8	6761	60.7	272	7.3
851	49724.4	4634	3.3	15	10.7
852	49833.2	5177	6.1	27	9.6
853	49918.8	3094	6.2	28	16.1
854	49932.8	3150	5.7	26	15.9
855	49963	4542	4.9	22	11
856	49975.7	3747	7	31	13.3
857	50003.8	7339	16.1	72	6.8
858	50022.3	10032	124.4	557	5
859	50043.3	7850	9.5	42	6.4
860	50064.3	4428	20	89	11.3
861	50075.3	4046	23.2	104	12.4
862	50081	4476	24.2	109	11.2
863	50144.3	4290	2.9	13	11.7
864	50161.5	4152	4	18	12.1
865	50298.5	4304	10.8	48	11.7
866	50344.2	6913	41.7	187	7.3
867	50383	4427	188.2	843	11.4
868	50403.5	4833	35.5	159	10.4
869	50442.4	3418	51.9	233	14.8
870	50462	5727	45.5	204	8.8
871	50471.9	5244	9.1	41	9.6
872	50483.9	3635	10.9	49	13.9
873	50502.6	5380	3.1	14	9.4
874	50541.6	4084	45	201	12.4
875	50591.5	4558	43.3	194	11.1
876	50742.6	5178	5.1	23	9.8
877	50749.7	3929	5.6	25	12.9
878	50781	5077	15.9	71	10
879	50792.4	4617	6.2	28	11
880	50823.4	3756	70.7	317	13.5
881	50856.3	3893	30.7	137	13.1
882	50863.7	4352	34.6	155	11.7
883	50906.2	3645	9.6	43	14
884	50921.4	3376	10.1	45	15.1
885	50947.7	3989	5.6	25	12.8
886	51029.6	3711	8.1	36	13.8
887	51039.6	6187	5.5	25	8.3
888	51081.1	3990	65.4	293	12.8
889	51101.3	3259	78	350	15.7
890	51116.4	2854	113.9	510	17.9
891	51141.3	5458	7.7	35	9.4
892	51151.2	6200	3.7	17	8.3
893	51173.3	6028	18.3	82	8.5
894	51208	4655	4.4	19	11
895	51254.5	6942	21.6	97	7.4
896	51272.3	7622	144.3	647	6.7
897	51293.9	10888	11.3	51	4.7
898	51315.4	6184	4.6	20	8.3
899	51326.3	5726	9.3	42	9
900	51409.5	4287	3.4	15	12
901	51428.6	4343	4.2	19	11.8
902	51441.3	3374	4.6	21	15.2
903	51488.7	6241	20.4	91	8.3
904	51496.3	4406	19.3	86	11.7
905	51510.5	2511	20	90	20.5
906	51517	4683	26.4	118	11
907	51605.8	4477	17.5	78	11.5
908	51613.5	3914	21.4	96	13.2
909	51623.3	3792	14.6	65	13.6
910	51648.8	3272	14.6	65	15.8
911	51713	6130	34.2	153	8.4
912	51730.5	2953	69.4	311	17.5
913	51771.3	4003	30.5	137	12.9
914	51823.3	4456	6.8	30	11.6
915	51846.6	3235	3.7	16	16
916	51863.6	3915	5	22	13.2
917	51876.8	4675	3.9	18	11.1
918	51898.7	9382	9.9	45	5.5
919	51919.7	7840	39.6	178	6.6
920	51939	5565	7	32	9.3
921	51959	4222	7.9	36	12.3
922	51979	5400	11.5	51	9.6
923	52018.6	3959	17.8	80	13.1
924	52040.8	3933	2.2	10	13.2
925	52065.2	2996	5.9	27	17.4
926	52111.6	3932	10.1	45	13.3
927	52132.2	4213	3.1	14	12.4
928	52144	3051	5.9	27	17.1
929	52163.1	5792	4.5	20	9
930	52232.8	4504	64	287	11.6
931	52247.2	3182	61.1	274	16.4
932	52257.9	3361	68.5	307	15.5
933	52285.6	6338	5.5	25	8.3
934	52318.5	5584	13.9	62	9.4
935	52329.1	2766	18.2	82	18.9
936	52354.5	3414	13.5	60	15.3
937	52364.2	5440	9.5	43	9.6
938	52398.6	3874	86.6	388	13.5
939	52486	5090	54.9	246	10.3
940	52502.9	8510	63.3	284	6.2
941	52524	9480	52.7	236	5.5
942	52544.9	9289	209.9	940	5.7
943	52578.9	4200	77.4	347	12.5
944	52611.5	4610	13.4	60	11.4
945	52618.2	5024	11	49	10.5
946	52832.9	3613	6	27	14.6
947	52850.9	3707	3	14	14.3
948	52875	4928	5.3	24	10.7
949	52892.2	4526	3.8	17	11.7
950	52915.5	3865	40.7	182	13.7
951	52949.8	4038	2767.4	12399	13.1
952	52984.6	4277	349.4	1565	12.4
953	53007.3	5100	30.2	135	10.4
954	53016.5	4133	20.2	90	12.8
955	53045	3858	4.8	22	13.8
956	53080.4	3888	4.5	20	13.7
957	53110	3902	17.4	78	13.6
958	53128.6	6936	31.2	140	7.7
959	53149	7671	28.8	129	6.9
960	53171.3	6069	4.1	18	8.8
961	53185.6	3516	2.8	13	15.1
962	53302.8	4815	3.2	15	11.1
963	53322.6	5465	11.8	53	9.8
964	53341.5	6466	3.6	16	8.3
965	53348.4	5543	3.9	17	9.6
966	53381.8	5066	39.6	177	10.5
967	53405.4	5549	2.9	13	9.6
968	53427.3	5181	10.9	49	10.3
969	53434.1	6477	10.6	47	8.3
970	53486.2	4344	25	112	12.3
971	53540.7	3894	2.3	10	13.8
972	53585.4	4706	30.2	135	11.4
973	53598.8	4393	44.3	198	12.2
974	53636.2	5713	17.3	78	9.4
975	53643.2	3315	17.1	77	16.2
976	53657.6	3122	12.6	57	17.2
977	53676.9	5131	17	76	10.5
978	53698.9	5516	2.7	12	9.7
979	53741.3	4423	13.9	62	12.2
980	53752.9	8485	22.1	99	6.3
981	53760.9	4430	7.9	35	12.1
982	53774.2	11303	15.1	68	4.8
983	53796.6	9054	8.8	39	5.9
984	53826.9	4881	14.1	63	11
985	53836.6	5863	7.7	35	9.2
986	53862	7796	53.3	239	6.9
987	53869.3	4582	66.5	298	11.8
988	53891.8	4126	10.2	46	13.1
989	53907.9	2800	13.4	60	19.3
990	53935.8	4564	11.2	50	11.8
991	53945.4	3236	15.3	69	16.7
992	54035.9	3780	83.4	374	14.3
993	54050.1	4368	17.9	80	12.4
994	54060.9	4607	16.3	73	11.7
995	54123.4	3887	6.7	30	13.9
996	54132.4	5249	6.5	29	10.3
997	54162.1	4820	29.6	132	11.2
998	54200.9	3610	3.8	17	15
999	54240.2	5838	8.7	39	9.3
1000	54245.5	4931	9.4	42	11
1001	54269.4	4752	143.8	644	11.4
1002	54311.1	4680	41.9	188	11.6
1003	54377.6	6986	97.9	439	7.8
1004	54400.4	8093	2.4	11	6.7
1005	54422.9	6338	48.5	217	8.6
1006	54442.8	3638	54.1	242	15
1007	54465	3906	16.1	72	13.9
1008	54487.5	4662	3.6	16	11.7
1009	54506.7	6607	2.6	12	8.3
1010	54518.4	5552	5.7	25	9.8
1011	54529.4	3837	6.8	31	14.2
1012	54607.5	4573	2.5	11	11.9
1013	54648.4	4799	9	40	11.4
1014	54695.5	5683	3.4	15	9.6
1015	54743.8	3717	14.1	63	14.7
1016	54754.1	4931	15.2	68	11.1
1017	54767.2	4979	19.8	89	11
1018	54806.1	6128	67.5	302	8.9
1019	54815.8	3236	86.5	387	16.9
1020	54845.7	4384	11.1	50	12.5
1021	54878.6	4264	71.7	321	12.9
1022	54911.4	5325	5.9	26	10.3
1023	54935.9	3805	60	269	14.4
1024	54943.7	5348	61.9	277	10.3
1025	54963.5	7268	7.7	35	7.6
1026	54978.1	5712	11.7	52	9.6
1027	55025	10899	27.9	125	5
1028	55047.4	9565	13.6	61	5.8
1029	55069.1	5292	19.9	89	10.4
1030	55167.5	4625	146.4	656	11.9
1031	55175.5	5155	138.6	621	10.7
1032	55223.4	5485	23	103	10.1
1033	55261.6	3665	55.9	250	15.1
1034	55299.1	5745	50.7	227	9.6
1035	55308.7	4102	67	300	13.5
1036	55508.9	7159	14.5	65	7.8
1037	55536.7	8078	88.5	397	6.9
1038	55543.3	4488	98.8	443	12.4
1039	55551.5	6065	81.9	367	9.2
1040	55573.7	5389	11.2	50	10.3
1041	55585.1	3545	14.7	66	15.7
1042	55593.9	5776	10.4	47	9.6
1043	55608.5	3677	9.3	42	15.1
1044	55617	5056	7.5	34	11
1045	55627.7	6801	9.2	41	8.2
1046	55650.3	9215	3.4	15	6
1047	55673.3	8399	2.8	13	6.6
1048	55695.9	3612	2.4	11	15.4
1049	55743.7	5140	5.5	25	10.8
1050	55777.6	5432	9.9	44	10.3
1051	55789.1	5796	6	27	9.6
1052	55810.5	4775	18.2	82	11.7
1053	55837.1	4461	52.4	235	12.5
1054	55860.1	4063	18.5	83	13.8
1055	55907.3	3757	13.4	60	14.9
1056	55915.7	4518	13.3	60	12.4
1057	55933.2	4541	8.6	38	12.3
1058	55969	4170	16.8	75	13.4
1059	56019.2	4289	5.3	24	13.1
1060	56043.1	3600	22.7	102	15.6
1061	56084.1	4532	50.2	225	12.4
1062	56093.1	5078	43.8	196	11
1063	56128.3	3949	7.7	34	14.2
1064	56170.8	3784	6.3	28	14.8
1065	56232.8	3502	6.3	28	16.1
1066	56252.6	7260	3.4	15	7.7
1067	56275.7	11743	22.8	102	4.8
1068	56298.7	8277	42.8	192	6.8
1069	56321.5	6273	123.7	554	9
1070	56373.8	6030	18.9	84	9.3
1071	56384.3	3228	21.1	94	17.5
1072	56428	3652	11.5	52	15.5
1073	56478.7	3043	12.2	55	18.6
1074	56497.5	4325	10.7	48	13.1
1075	56506	4541	10.1	45	12.4
1076	56543.4	4082	30.3	136	13.9
1077	56556.4	3739	28.7	129	15.1
1078	56594.4	3742	7.6	34	15.1
1079	56604.2	7485	6.4	28	7.6
1080	56637.9	3582	167.7	751	15.8
1081	56743.3	3789	17.5	78	15
1082	56768.6	6014	14.7	66	9.4
1083	56802.1	4117	53.8	241	13.8
1084	56839.6	4209	11.6	52	13.5
1085	56879.5	6608	14.4	65	8.6
1086	56902.2	5720	12.7	57	9.9
1087	56923.5	5898	57.2	256	9.7
1088	56969.9	3946	17.6	79	14.4
1089	56993	4876	9.6	43	11.7
1090	57016	4169	17.9	80	13.7
1091	57089.2	5038	2.4	11	11.3
1092	57123.3	5935	13.4	60	9.6
1093	57176.9	5303	47.1	211	10.8
1094	57189.2	5567	43.1	193	10.3
1095	57243.8	3605	52.4	235	15.9
1096	57314.4	4719	26.5	119	12.1
1097	57351.8	4391	4.6	21	13.1
1098	57389.1	5184	63.1	283	11.1
1099	57429.4	3844	10.3	46	14.9
1100	57457.4	8357	2.3	10	6.9
1101	57465	4399	2.6	11	13.1
1102	57482	3704	5.8	26	15.5
1103	57491.7	4646	5.5	25	12.4
1104	57502.1	7036	8.6	38	8.2
1105	57525.8	10926	8.1	36	5.3
1106	57550	8950	4	18	6.4
1107	57560.4	5233	2.6	12	11
1108	57572.9	5193	4.1	18	11.1
1109	57630.1	5226	2.3	10	11
1110	57654.3	2994	35.3	158	19.3
1111	57709.8	4315	13.2	59	13.4
1112	57723.7	6459	4.7	21	8.9
1113	57733.9	6460	5.2	23	8.9
1114	57763.1	3691	42.4	190	15.7
1115	57795.7	5962	12.5	56	9.7
1116	57814.5	4537	15.6	70	12.7
1117	57879.9	3424	45.1	202	16.9
1118	57893	4737	41.1	184	12.2
1119	57916.5	5269	52.1	233	11
1120	57947.2	4436	21.1	94	13.1
1121	57958.5	4684	20.7	93	12.4
1122	57988	3349	9.4	42	17.3
1123	58009.5	6027	27.6	123	9.6
1124	58017.1	4219	26.7	120	13.8
1125	58031.8	6427	59.6	267	9
1126	58053.7	5182	15.3	69	11.2
1127	58080.8	5485	63.6	285	10.6
1128	58101.8	4076	51.9	233	14.3
1129	58115.8	4696	39.3	176	12.4
1130	58126.2	6377	39.2	176	9.1
1131	58150.8	4637	3.6	16	12.5
1132	58175.2	4395	8.6	39	13.2
1133	58194.2	4110	6	27	14.2
1134	58238	2782	28.8	129	20.9
1135	58316.9	4241	15.1	67	13.8
1136	58327.9	5175	14.2	63	11.3
1137	58357.5	2975	4.2	19	19.6
1138	58374.6	4750	2.3	10	12.3
1139	58421	4782	3.8	17	12.2
1140	58465.7	6498	7.3	33	9
1141	58501.9	6078	28.8	129	9.6
1142	58515.9	3152	33.2	149	18.6
1143	58527.1	4481	38.8	174	13.1
1144	58538.5	4730	44	197	12.4
1145	58546.7	6083	49.7	222	9.6
1146	58562.7	3393	121.3	544	17.3
1147	58601.1	3791	12.8	57	15.5
1148	58639.7	3046	6.4	29	19.3
1149	58647.1	3877	6.4	29	15.1
1150	58663.3	3555	5.5	25	16.5
1151	58710.4	4093	4.7	21	14.3
1152	58753.6	9455	21.7	97	6.2
1153	58777.3	11130	25.3	113	5.3
1154	58788.4	4703	8.1	36	12.5
1155	58800.2	10245	17	76	5.7
1156	58825.3	6763	47.1	211	8.7
1157	58832.9	4754	54.8	246	12.4
1158	58847.4	5202	42.8	192	11.3
1159	58895.8	5083	16.4	73	11.6
1160	58952.5	4764	21.9	98	12.4
1161	58961.7	4877	19.3	86	12.1
1162	58994.8	5952	24.4	110	9.9
1163	59031.4	4101	3.5	16	14.4
1164	59069.6	4216	4	18	14
1165	59106.4	6379	4.8	22	9.3
1166	59118.9	3973	4.5	20	14.9
1167	59130.5	3909	3.7	16	15.1
1168	59139.3	5060	2.9	13	11.7
1169	59153.4	4015	4.5	20	14.7
1170	59169.1	2869	4.7	21	20.6
1171	59210.5	7177	10.1	45	8.3
1172	59249.3	5465	15.6	70	10.8
1173	59276.9	4182	11.7	52	14.2
1174	59306.5	3648	54.4	244	16.3
1175	59316.7	6175	118.7	532	9.6
1176	59330	3319	87.9	394	17.9
1177	59337.7	7496	78.3	351	7.9
1178	59379.8	5814	11.5	52	10.2
1179	59402.5	9034	109.3	490	6.6
1180	59426.9	6014	11.7	53	9.9
1181	59434.7	7204	9.4	42	8.3
1182	59472.6	4277	6.3	28	13.9
1183	59502	4529	26	117	13.1
1184	59549	5161	10.1	45	11.5
1185	59579.1	5539	40.7	182	10.8
1186	59618.9	3727	10.5	47	16
1187	59642.8	4200	5.7	26	14.2
1188	59671.6	6287	49	220	9.5
1189	59678.6	5106	52.8	236	11.7
1190	59688.7	3701	56.3	252	16.1
1191	59713.9	4111	39.8	178	14.5
1192	59738.5	4020	14.3	64	14.9
1193	59750.1	5112	10.9	49	11.7
1194	59758.2	4107	11.3	51	14.5
1195	59789.2	5619	166.9	748	10.6
1196	59820.2	3783	45.6	204	15.8
1197	59870	7257	16.6	75	8.3
1198	59876.9	2314	15.7	70	25.9
1199	59896.4	2868	17.7	79	20.9
1200	59973.3	4552	12.6	57	13.2
1201	59982.7	3962	9.3	42	15.1
1202	60004	8350	29.8	134	7.2
1203	60026.9	10256	27.6	124	5.9
1204	60052.5	5695	8.2	37	10.5
1205	60064.2	6092	4.3	19	9.9
1206	60101	5635	2.8	12	10.7
1207	60136.4	2555	19.2	86	23.5
1208	60162.7	7955	5.1	23	7.6
1209	60172.2	2778	5.8	26	21.7
1210	60196	4864	4.8	21	12.4
1211	60205.2	4232	4	18	14.2
1212	60303.1	4873	4.2	19	12.4
1213	60339.2	4909	26.6	119	12.3
1214	60412.2	3359	3.1	14	18
1215	60449	5347	16.1	72	11.3
1216	60484.3	4399	8.6	38	13.8
1217	60500.7	4582	29	130	13.2
1218	60555.1	5492	6.7	30	11
1219	60579.2	4552	7.1	32	13.3
1220	60628.4	8444	3.6	16	7.2
1221	60668.5	7354	118.3	530	8.3
1222	60676.1	5901	186.4	835	10.3
1223	60703	4091	299.3	1341	14.8
1224	60722.6	5367	144.2	646	11.3
1225	60774	3929	97	434	15.5
1226	60796.8	6317	13.4	60	9.6
1227	60815.5	3686	28	125	16.5
1228	60838.6	7132	64.2	288	8.5
1229	60846.8	4425	67.8	304	13.8
1230	60890	3261	101.3	454	18.7
1231	60913.5	6317	28.1	126	9.6
1232	60927.4	6330	11.2	50	9.6
1233	60953.7	3795	42.3	190	16.1
1234	60997.8	5354	192.2	861	11.4
1235	61055.1	3388	211.2	946	18
1236	61079.1	5553	38.5	173	11
1237	61088.7	4443	43.3	194	13.8
1238	61097.8	4937	44	197	12.4
1239	61119.3	5556	14.9	67	11
1240	61128.2	4446	19.7	88	13.8
1241	61184.2	6520	43.5	195	9.4
1242	61233.1	4048	17.6	79	15.1
1243	61251.6	6032	13.2	59	10.2
1244	61277.5	11155	17.8	80	5.5
1245	61302.4	9496	15.7	70	6.5
1246	61314.3	4694	6.1	27	13.1
1247	61338.6	5948	21.5	96	10.3
1248	61383.3	4058	4.1	19	15.1
1249	61422.2	5381	5.4	24	11.4
1250	61460	3357	2.9	13	18.3
1251	61563.7	4368	2.6	12	14.1
1252	61574.9	5268	2.7	12	11.7
1253	61579.3	8143	2.6	12	7.6
1254	61620.2	4979	2.5	11	12.4
1255	61644.1	4476	4.1	18	13.8
1256	61765	7487	2.7	12	8.3
1257	61779	3664	4.2	19	16.9
1258	61881.3	5163	6.8	31	12
1259	61903.2	4804	7.5	33	12.9
1260	61928.6	7271	7.1	32	8.5
1261	61952.2	3943	3.5	16	15.7
1262	61996.3	5010	25.9	116	12.4
1263	62011.5	3087	35.3	158	20.1
1264	62036.7	3038	20.9	94	20.4
1265	62091.3	5464	202.2	906	11.4
1266	62113.8	4517	109.5	491	13.8
1267	62132.8	3932	156.9	703	15.8
1268	62158.1	3530	409.3	1834	17.6
1269	62169	4781	356.8	1599	13
1270	62212.7	4763	711.5	3188	13.1
1271	62220.2	4525	695.4	3116	13.8
1272	62263.3	4767	527	2361	13.1
1273	62276.4	7549	529	2370	8.3
1274	62289.8	3485	683.4	3062	17.9
1275	62359.5	5039	721.4	3232	12.4
1276	62372.1	5040	607	2720	12.4
1277	62401.9	3491	148.6	666	17.9
1278	62429.9	6486	48.3	217	9.6
1279	62446.9	3006	80.9	362	20.8
1280	62471.8	4543	67.6	303	13.8
1281	62480.6	3329	89.5	401	18.8
1282	62503.6	6339	168	753	9.9
1283	62527.9	8929	367.7	1647	7
1284	62554.2	9105	25.4	114	6.9
1285	62577.8	4034	72.2	323	15.5
1286	62633.6	3504	4.1	18	17.9
1287	62643.6	6508	3.3	15	9.6
1288	62669.1	3992	9.1	41	15.7
1289	62825.1	4412	3.8	17	14.2
1290	62867.1	4047	3.3	15	15.5
1291	62938.6	3871	5.3	24	16.3
1292	63391.6	6561	5.9	27	9.7
1293	63399.2	3663	5.8	26	17.3
1294	63443.1	5535	64	287	11.5
1295	63449.9	5688	59.7	267	11.2
1296	63477.3	4230	231.4	1037	15
1297	63491.5	6597	213.2	955	9.6
1298	63503.2	3125	322.4	1444	20.3
1299	63537.8	9242	3437.6	15402	6.9
1300	63581	7114	633.8	2840	8.9
1301	63608.2	5783	905.2	4055	11
1302	63653.1	3561	625.6	2803	17.9
1303	63687.5	3538	246.1	1103	18
1304	63702	2647	251.8	1128	24.1
1305	63733.1	5794	573.1	2568	11
1306	63752.9	6644	395.7	1773	9.6
1307	63767.7	5456	145	650	11.7
1308	63778.5	9105	348.3	1560	7
1309	63805.7	7881	54.9	246	8.1
1310	63832.2	3869	84.5	379	16.5
1311	63896	5526	491	2200	11.6
1312	63940.6	5040	4.5	20	12.7
1313	64012.2	5295	2.6	12	12.1
1314	64059.3	3698	302.5	1355	17.3
1315	64082	4916	136	609	13
1316	64134.8	4431	11.1	50	14.5
1317	64201.8	3786	4.7	21	17
1318	64257.1	4919	9.2	41	13.1
1319	64264.9	6791	8.1	36	9.5
1320	64313.8	6624	32.2	144	9.7
1321	64320.2	6580	28.2	126	9.8
1322	64671.4	4730	3	14	13.7
1323	64681.3	4447	2.9	13	14.5
1324	64725.5	5679	14.1	63	11.4
1325	64738.9	9417	11.9	53	6.9
1326	64775.9	5983	45.9	205	10.8
1327	64803.6	5891	66.4	297	11
1328	64808.9	4713	67.4	302	13.8
1329	64820	4714	50.6	227	13.8
1330	64868	5242	249.9	1120	12.4
1331	64883.1	5243	283.1	1269	12.4
1332	64885.9	2596	278.4	1247	25
1333	64912.9	4721	207.6	930	13.8
1334	64927.1	4293	314.3	1408	15.1
1335	64936.9	4293	277.1	1241	15.1
1336	64948.9	4724	250.4	1122	13.8
1337	64970.5	4296	392.1	1757	15.1
1338	64977.1	4726	392.9	1760	13.8
1339	64990.2	3781	339.5	1521	17.2
1340	65003.4	6984	393	1761	9.3
1341	65012.4	4202	171	766	15.5
1342	65029.7	8733	212.2	951	7.4
1343	65055.5	8511	797.9	3575	7.6
1344	65091.9	4124	65.4	293	15.8
1345	65109.4	6765	84.6	379	9.6
1346	65124.5	3615	200.1	896	18
1347	65167.3	3063	74	332	21.3
1348	65182.8	5050	39.5	177	12.9
1349	65254.9	6033	8.4	37	10.8
1350	65447.4	7130	2.7	12	9.2
1351	65454	5289	2.8	12	12.4
1352	65576.7	4498	9.3	42	14.6
1353	65588.4	4336	8.1	36	15.1
1354	65600.5	6573	9.2	41	10
1355	65628.9	6820	6	27	9.6
1356	65654.7	10010	257.3	1153	6.6
1357	65683.8	8032	75.2	337	8.2
1358	65689.9	4343	92.5	414	15.1
1359	65697.8	9556	69.2	310	6.9
1360	65706.8	3982	78.2	351	16.5
1361	65733.5	5354	383.1	1716	12.3
1362	65767.1	5035	298.3	1336	13.1
1363	65775.8	5628	334.7	1499	11.7
1364	65784.8	5036	331.9	1487	13.1
1365	65802.6	6837	258.8	1159	9.6
1366	65822.9	5984	348.6	1562	11
1367	65836.7	4353	415.4	1861	15.1
1368	65843.5	5041	408.1	1828	13.1
1369	65860.7	3832	443.7	1988	17.2
1370	65875.6	3833	392.5	1759	17.2
1371	65889.2	3349	340.9	1528	19.7
1372	65926	5993	63	282	11
1373	65933.5	3094	64.3	288	21.3
1374	65947.6	3503	49.7	223	18.8
1375	65959.4	5330	31	139	12.4
1376	65971.1	5331	24.7	111	12.4
1377	66026.5	3743	15.9	71	17.6
1378	66038.2	5773	9.5	43	11.4
1379	66201.2	4733	227	1017	14
1380	66498.1	4118	16.8	75	16.1
1381	66511.5	9674	13	58	6.9
1382	66524.8	3871	17.5	78	17.2
1383	66532	5226	17.8	80	12.7
1384	66556.7	4063	38.3	172	16.4
1385	66568.5	4841	39.8	178	13.8
1386	66579.4	5184	37.6	168	12.8
1387	66602.1	3240	92.6	415	20.6
1388	66650.1	5274	410.5	1839	12.6
1389	66676.1	4408	113.9	510	15.1
1390	66690.1	3464	94.5	423	19.3
1391	66706	3881	80.2	360	17.2
1392	66731.1	3248	118.1	529	20.5
1393	66776	4047	41.1	184	16.5
1394	66787.5	5397	47.9	215	12.4
1395	66798	2944	57.7	258	22.7
1396	66842.9	4374	94	421	15.3
1397	66861.1	5632	34.9	156	11.9
1398	66880.2	6409	63.8	286	10.4
1399	66887.8	6210	60.3	270	10.8
1400	66905.2	5108	35.7	160	13.1
1401	66932.4	7067	57.2	256	9.5
1402	66959.8	4423	13.3	59	15.1
1403	67373.6	3920	90.3	405	17.2
1404	67394.8	4085	76.8	344	16.5
1405	67409.9	4669	94.1	421	14.4
1406	67418.6	7005	84.9	381	9.6
1407	67428.7	6130	83.9	376	11
1408	67454.3	4480	182.4	817	15.1
1409	67469.6	3926	260.7	1168	17.2
1410	67482.2	7011	220.6	988	9.6
1411	67494.4	4966	431	1931	13.6
1412	67503.6	7052	727.1	3258	9.6
1413	67513.5	5777	315	1411	11.7
1414	67530.7	6909	570.8	2558	9.8
1415	67548.8	7018	176.8	792	9.6
1416	67558.2	6907	381.7	1710	9.8
1417	67575.7	4095	284.6	1275	16.5
1418	67583.4	4954	265	1187	13.6
1419	67596.1	5462	167.3	750	12.4
1420	67614.2	3660	275.7	1235	18.5
1421	67627	3991	245.5	1100	16.9
1422	67643.2	8199	152.5	683	8.3
1423	67682.7	4521	220.8	989	15
1424	67689.7	4430	174.7	783	15.3
1425	67711.5	4924	132.2	592	13.8
1426	67762.1	4850	112.4	503	14
1427	67824	5531	12.2	54	12.3
1428	67835.5	7149	15.2	68	9.5
1429	67880.2	5071	34.6	155	13.4
1430	68079.7	8252	8.7	39	8.3
1431	68086.4	6190	8.6	39	11
1432	68126.6	5564	13.5	60	12.2
1433	68156.1	5583	17.6	79	12.2
1434	68184.5	4577	18	81	14.9
1435	68207.7	2856	16.6	74	23.9
1436	68238.8	3375	43	193	20.2
1437	68254.4	5225	33.1	148	13.1
1438	68260.6	8274	33.4	150	8.3
1439	68268.5	9027	33.8	152	7.6
1440	68284.8	8277	37.2	167	8.3
1441	68311.5	5520	35.9	161	12.4
1442	68323.9	3158	37.1	166	21.6
1443	68340.3	4141	20.7	93	16.5
1444	68376.2	4303	20.4	91	15.9
1445	68391.5	5527	30.9	139	12.4
1446	68406.5	4523	30.3	136	15.1
1447	68415.9	5238	35.4	159	13.1
1448	68431	4977	25	112	13.8
1449	68442.9	5915	34.2	153	11.6
1450	68457.9	6223	32.3	145	11
1451	68508.5	4399	14.7	66	15.6
1452	68512.3	8305	14.8	66	8.3
1453	68529.3	4976	16.7	75	13.8
1454	68542.4	7121	8.4	38	9.6
1455	68554.5	6049	8.2	37	11.3
1456	68596.7	5869	8.3	37	11.7
1457	68631.2	5546	10	45	12.4
1458	68638.4	4009	11.4	51	17.1
1459	68781.5	10281	4.1	18	6.7
1460	68810.3	7538	31.2	140	9.1
1461	68836.4	6709	132	592	10.3
1462	68849.6	8345	51.8	232	8.3
1463	68916.1	3692	6.5	29	18.7
1464	68975.4	4153	220.8	989	16.6
1465	69023.1	5800	212.2	951	11.9
1466	69043.1	7173	77.3	346	9.6
1467	69080.5	4567	139.3	624	15.1
1468	69141.3	4212	210.8	944	16.4
1469	69196.1	4668	107.3	481	14.8
1470	69209.3	4576	103.6	464	15.1
1471	69237	6151	17	76	11.3
1472	69277.4	3738	67.9	304	18.5
1473	69306.2	3877	22.1	99	17.9
1474	69318.7	4384	19.2	86	15.8
1475	69343.9	3604	23.3	104	19.2
1476	69378.5	3738	3.1	14	18.6
1477	69408.6	7970	20.5	92	8.7
1478	69433.7	5876	47.3	212	11.8
1479	69471.4	4812	2.4	11	14.4
1480	69491.9	4824	3.7	17	14.4
1481	69513.1	5411	7.3	33	12.8
1482	69522.5	5322	7.5	34	13.1
1483	69551.9	3956	6.7	30	17.6
1484	69569.5	7228	2.3	10	9.6
1485	69596.3	5624	13.3	60	12.4
1486	69601.6	6327	13.7	61	11
1487	69613	5063	12.9	58	13.8
1488	69628.6	5627	9.8	44	12.4
1489	69640.5	3974	16.1	72	17.5
1490	69669.2	7238	32.2	144	9.6
1491	69675.7	5899	31	139	11.8
1492	69696.4	5557	16.5	74	12.5
1493	69717.6	4319	10.8	48	16.1
1494	69748.5	3505	39.9	179	19.9
1495	69761.1	10147	32.2	144	6.9
1496	69775.3	5500	39.8	178	12.7
1497	69808	4057	26.5	119	17.2
1498	69832.4	5975	10.9	49	11.7
1499	69875.6	5859	73.8	330	11.9
1500	69889.3	4672	105.1	471	15
1501	69938.4	4601	2.9	13	15.2
1502	69963.4	6399	12	54	10.9
1503	69982	4551	21.3	95	15.4
1504	70003	8009	8.3	37	8.7
1505	70032	9964	32	143	7
1506	70047.3	4226	11.8	53	16.6
1507	70059.2	9030	20.5	92	7.8
1508	70072.6	5364	5.7	25	13.1
1509	70088.2	5467	8.1	36	12.8
1510	70115.5	5535	44.3	199	12.7
1511	70153.9	5669	207.1	928	12.4
1512	70201.3	6007	10.8	48	11.7
1513	70218.3	4313	13	58	16.3
1514	70231.7	4703	10.6	47	14.9
1515	70279.2	5123	8.8	39	13.7
1516	70293	4810	6.6	30	14.6
1517	70342.8	4456	6.8	30	15.8
1518	70353.8	5685	9.7	43	12.4
1519	70378.1	4265	4.2	19	16.5
1520	70459	4099	66.5	298	17.2
1521	70481.1	5695	25.2	113	12.4
1522	70496.5	6032	16.5	74	11.7
1523	70508.5	4193	19.8	89	16.8
1524	70522.3	5129	19.9	89	13.8
1525	70535	3946	23.2	104	17.9
1526	70554.4	4665	22.8	102	15.1
1527	70607.2	3804	129.7	581	18.6
1528	70628	6102	56.7	254	11.6
1529	70657.3	6519	111.6	500	10.8
1530	70673.6	6126	18.3	82	11.5
1531	70688.2	4896	14.2	64	14.4
1532	70706.1	5193	34.5	155	13.6
1533	70714.6	4370	37.7	169	16.2
1534	70729.7	6052	18.1	81	11.7
1535	70743.7	4555	22.2	100	15.5
1536	70759.1	3815	33.3	149	18.5
1537	70771.4	4127	33.5	150	17.1
1538	70789.5	6435	12.6	56	11
1539	70806.1	4120	17.7	79	17.2
1540	70843.7	4631	6.4	29	15.3
1541	70916	4689	14.7	66	15.1
1542	70929.3	3293	17.9	80	21.5
1543	70950.7	7939	9.9	44	8.9
1544	70972.3	6452	4.6	21	11
1545	71012.5	4241	143.7	644	16.7
1546	71064.5	6493	7.1	32	10.9
1547	71098.1	6050	20.3	91	11.8
1548	71153.1	4226	19.1	86	16.8
1549	71167.2	3605	22	98	19.7
1550	71183.2	5752	20.8	93	12.4
1551	71237.2	3985	11.5	52	17.9
1552	71253.5	7362	18.1	81	9.7
1553	71282.4	11069	26.8	120	6.4
1554	71312	7744	20.3	91	9.2
1555	71321.5	7410	19.3	86	9.6
1556	71338.5	4398	43.7	196	16.2
1557	71347.5	5274	33.1	148	13.5
1558	71362.3	103800	29.4	132	0.7
1559	71404.2	6687	37.5	168	10.7
1560	71468.9	4835	81.1	363	14.8
1561	71484.4	5053	114.6	514	14.1
1562	71514.9	4827	41.1	184	14.8
1563	71532.3	5780	22.3	100	12.4
1564	71544.2	4379	30.2	135	16.3
1565	71569.3	3821	29	130	18.7
1566	71612.7	5208	8.3	37	13.8
1567	71630.8	3511	16.2	73	20.4
1568	71700.3	5215	33	148	13.8
1569	71710.3	4741	44.3	198	15.1
1570	71759.2	5093	18.2	82	14.1
1571	71787.9	4978	50.7	227	14.4
1572	71824.3	4667	46.1	206	15.4
1573	71907.5	9503	101.1	453	7.6
1574	71938.1	6701	9.2	41	10.7
1575	71957.3	5356	13.9	62	13.4
1576	71965.9	4654	18.2	82	15.5
1577	71994.4	4189	11.6	52	17.2
1578	72012.2	5237	24.8	111	13.8
1579	72023.5	5514	24.1	108	13.1
1580	72036.8	4821	40.3	181	14.9
1581	72053.9	4347	52.5	235	16.6
1582	72069.1	4017	71.6	321	17.9
1583	72129.3	10492	4.2	19	6.9
1584	72133.3	10492	4.1	19	6.9
1585	72158.2	4998	5.5	25	14.4
1586	72196.9	5100	157.1	704	14.2
1587	72203.3	4232	145.3	651	17.1
1588	72238.4	3753	28.3	127	19.3
1589	72268.9	5840	9	40	12.4
1590	72282.1	3894	10.6	47	18.6
1591	72297.2	4268	12.1	54	16.9
1592	72342.2	6577	27.7	124	11
1593	72360	4977	40.2	180	14.5
1594	72388	6194	12.8	57	11.7
1595	72402.8	5543	12.9	58	13.1
1596	72416.9	3511	15.6	70	20.6
1597	72423.9	9577	14.6	65	7.6
1598	72433.4	6409	14.1	63	11.3
1599	72453.2	6587	12.4	56	11
1600	72465.3	6200	15	67	11.7
1601	72475.1	4471	23.6	106	16.2
1602	72503.7	8270	16.2	73	8.8
1603	72517.3	4409	8.4	38	16.4
1604	72533.1	9463	21.6	97	7.7
1605	72545.4	8793	4.6	21	8.3
1606	72562.5	10270	24.5	110	7.1
1607	72576.2	3910	9	40	18.6
1608	72619.2	4351	47	211	16.7
1609	72650.4	6605	19.6	88	11
1610	72655.8	5871	19.7	88	12.4
1611	72693.4	4806	7.4	33	15.1
1612	72708.5	5799	5.5	24	12.5
1613	72755.8	3539	6.1	27	20.6
1614	72804.5	4025	79.3	355	18.1
1615	72832.5	5297	25.5	114	13.8
1616	72884.8	4819	24.1	108	15.1
1617	72940.2	4070	33.7	151	17.9
1618	72952.6	9647	19.3	86	7.6
1619	72996.2	5588	22.3	100	13.1
1620	73003.7	7449	16.2	72	9.8
1621	73026.7	4951	24.3	109	14.8
1622	73075.1	5905	6.1	27	12.4
1623	73084.4	3876	7.4	33	18.9
1624	73103	4771	7.3	33	15.3
1625	73130.3	7181	51.9	233	10.2
1626	73142.4	5319	59.3	266	13.8
1627	73158.6	8420	109.4	490	8.7
1628	73170	7918	89.4	400	9.2
1629	73186.9	5323	21.4	96	13.8
1630	73200.5	7038	45.4	203	10.4
1631	73214.5	4362	23	103	16.8
1632	73305.3	5924	207.8	931	12.4
1633	73352.9	8891	19.2	86	8.3
1634	73430.2	9710	42.5	190	7.6
1635	73492.2	3513	136	609	20.9
1636	73536.6	2609	49.6	222	28.2
1637	73567.2	4448	41.7	187	16.5
1638	73578	6701	24.7	111	11
1639	73614.9	5636	32.5	145	13.1
1640	73632.7	3347	37.5	168	22
1641	73660.9	5183	54.2	243	14.2
1642	73711.9	4874	69.5	311	15.1
1643	73725	5362	62.6	280	13.8
1644	73732.5	5958	62.4	280	12.4
1645	73753.5	6462	76	340	11.4
1646	73784.4	9093	154.2	691	8.1
1647	73812.7	9526	42.5	191	7.7
1648	73841.2	5783	39.8	178	12.8
1649	73889.3	5657	3.4	15	13.1
1650	73899.2	4529	3.6	16	16.3
1651	73920	5595	3.5	15	13.2
1652	73977.9	4139	2.5	11	17.9
1653	74022.7	5127	3.6	16	14.4
1654	74067.9	4317	19.6	88	17.2
1655	74130.2	4040	263.6	1181	18.3
1656	74154.5	5677	63.8	286	13.1
1657	74186.4	4496	20.8	93	16.5
1658	74215.7	2940	20.7	93	25.2
1659	74240.2	4670	25	112	15.9
1660	74273	6621	6.7	30	11.2
1661	74286.3	4354	3.7	16	17.1
1662	74334.2	4005	20.6	92	18.6
1663	74358.5	4507	8.3	37	16.5
1664	74379.7	5555	15.4	69	13.4
1665	74408.9	9176	21.6	97	8.1
1666	74468.2	4777	23	103	15.6
1667	74489.8	4898	45.6	204	15.2
1668	74546.7	3665	101.6	455	20.3
1669	74576.2	6736	52.1	234	11.1
1670	74585.2	4174	61.8	277	17.9
1671	74642.9	6806	2.4	11	11
1672	74658.2	5153	3.6	16	14.5
1673	74677.3	4256	12.9	58	17.5
1674	74703.4	7761	4.5	20	9.6
1675	74737	5120	298.7	1338	14.6
1676	74761.1	6041	169.8	761	12.4
1677	74767	4050	162.9	730	18.5
1678	74795.1	6800	19.2	86	11
1679	74823.1	4942	82.3	369	15.1
1680	74850.2	5444	14.4	64	13.8
1681	74881.5	5915	12.8	57	12.7
1682	74902	4519	4.4	20	16.6
1683	74969.1	5739	104.1	466	13.1
1684	75005.2	7389	11.5	52	10.2
1685	75034.1	9751	151.8	680	7.7
1686	75065	7746	39.8	178	9.7
1687	75093	5931	79.5	356	12.7
1688	75178.4	4560	120.9	542	16.5
1689	75243.2	3093	22.4	100	24.3
1690	75255.2	4976	17.3	77	15.1
1691	75298.7	4774	34.3	154	15.8
1692	75318.3	6444	21.9	98	11.7
1693	75329.9	4999	31.1	140	15.1
1694	75342.9	4331	19.7	88	17.4
1695	75375.5	5770	10.7	48	13.1
1696	75404.6	5338	24.6	110	14.1
1697	75423.8	3393	27.4	123	22.2
1698	75434.2	6858	22.9	102	11
1699	75452.3	5226	31.5	141	14.4
1700	75465.4	4222	30.7	138	17.9
1701	75526.8	4225	14.2	64	17.9
1702	75553.1	7850	6.2	28	9.6
1703	75574	7328	13.7	61	10.3
1704	75582.2	9994	11.4	51	7.6
1705	75590.6	5765	11.5	52	13.1
1706	75600.3	4998	12.8	58	15.1
1707	75628.9	6546	13.8	62	11.6
1708	75659.1	6945	31	139	10.9
1709	75691.1	7065	19.5	87	10.7
1710	75724.2	5474	14.9	67	13.8
1711	75740.5	3620	20.7	93	20.9
1712	75772.9	4388	5.1	23	17.3
1713	75792.4	110243	15.9	71	0.7
1714	75800.3	5803	18.9	85	13.1
1715	75811.7	7877	18	81	9.6
1716	75829.7	6488	10.7	48	11.7
1717	75886.2	4245	18.6	83	17.9
1718	75904.5	4479	10.2	46	16.9
1719	75940.1	5021	18.4	82	15.1
1720	75982	6501	57.5	258	11.7
1721	76012.6	4423	118.8	532	17.2
1722	76024.1	4268	112.3	503	17.8
1723	76045.4	4577	61.6	276	16.6
1724	76113.4	4663	6.6	30	16.3
1725	76126.9	3802	7.4	33	20
1726	76164.2	4781	38.7	174	15.9
1727	76198.1	2893	24.4	109	26.3
1728	76218.9	4106	21.4	96	18.6
1729	76253.8	7550	137.7	617	10.1
1730	76284.7	9645	115.1	516	7.9
1731	76294.6	5841	46.3	207	13.1
1732	76314.8	8375	63.5	285	9.1
1733	76346.2	5208	18.8	84	14.7
1734	76355.1	5769	26.7	120	13.2
1735	76378.3	4874	22.1	99	15.7
1736	76422.3	6539	4.2	19	11.7
1737	76442.5	9266	18.9	85	8.3
1738	76450.2	4277	22.6	101	17.9
1739	76481.9	5398	57.3	257	14.2
1740	76487.7	6953	59.8	268	11
1741	76494.5	6181	58.3	261	12.4
1742	76502.8	5564	51.4	230	13.8
1743	76535.1	3901	99.5	446	19.6
1744	76564	3712	35.1	157	20.6
1745	76635.3	5171	65.5	293	14.8
1746	76681.2	4058	17.9	80	18.9
1747	76712.1	3297	12.3	55	23.3
1748	76775.9	5584	27.4	123	13.8
1749	76810.5	3921	6.5	29	19.6
1750	76839.3	4011	13.2	59	19.2
1751	76853.9	7452	11.7	53	10.3
1752	76867.6	3606	19.3	87	21.3
1753	76878.8	5075	20.3	91	15.1
1754	76909.3	5945	56.7	254	12.9
1755	76921.7	3541	23.3	104	21.7
1756	76941.2	6945	25.7	115	11.1
1757	76969.6	9330	53.2	238	8.3
1758	77004.1	5895	19.8	89	13.1
1759	77013.8	6809	15.8	71	11.3
1760	77056.7	5710	7.5	33	13.5
1761	77122.1	5099	19.8	89	15.1
1762	77159.8	4676	147.4	660	16.5
1763	77201.7	6266	62	278	12.3
1764	77223.7	5912	245.1	1098	13.1
1765	77237.4	4494	265.5	1190	17.2
1766	77277.6	5916	13.3	60	13.1
1767	77299.6	6614	7.1	32	11.7
1768	77352.4	4688	15.3	68	16.5
1769	77374.5	4502	9.3	42	17.2
1770	77396.9	5629	7.5	33	13.8
1771	77409.9	4264	11.6	52	18.2
1772	77439.5	4915	53.1	238	15.8
1773	77473	4088	19.8	89	19
1774	77503.4	8152	73	327	9.5
1775	77534.9	10465	17.9	80	7.4
1776	77549.3	5058	2.9	13	15.3
1777	77567.7	10900	21.5	96	7.1
1778	77595.9	5161	88.2	395	15
1779	77651.2	4516	41.1	184	17.2
1780	77675.9	6646	19.3	87	11.7
1781	77745.4	5140	35.8	160	15.1
1782	77769.8	5656	39.7	178	13.8
1783	77793.8	7544	22.1	99	10.3
1784	77859.8	4719	3.7	16	16.5
1785	77870.3	6293	4.6	21	12.4
1786	77881.1	3979	6.8	31	19.6
1787	77894.8	3893	4.4	20	20
1788	77941.4	4360	9.3	42	17.9
1789	77976.1	9912	48.5	217	7.9
1790	78000.5	5157	94.9	425	15.1
1791	78023.6	10317	139.4	625	7.6
1792	78031.2	6028	142.6	639	12.9
1793	78049	4752	65.6	294	16.4
1794	78094.1	5163	165.9	743	15.1
1795	78104.1	4121	111.7	500	19
1796	78127.9	6722	37	166	11.6
1797	78145.1	6686	8.4	38	11.7
1798	78161.7	7196	29	130	10.9
1799	78191.5	4893	4.8	22	16
1800	78221.7	5312	34.5	155	14.7
1801	78246.3	6790	10.9	49	11.5
1802	78266.2	3338	9	40	23.4
1803	78282.9	4555	6.9	31	17.2
1804	78296.1	6324	12.4	56	12.4
1805	78310.6	4020	23	103	19.5
1806	78362.2	6705	36.3	163	11.7
1807	78383.6	6001	10	45	13.1
1808	78412.8	3728	13.8	62	21
1809	78433.4	5704	8.6	39	13.8
1810	78474.7	4262	55.4	248	18.4
1811	78530.6	2856	8.4	38	27.5
1812	78545.4	4761	9.7	44	16.5
1813	78604.5	5444	32.3	145	14.4
1814	78667.8	4577	22.1	99	17.2
1815	78685.4	3937	37.2	167	20
1816	78695.3	3680	41.8	187	21.4
1817	78730.5	6362	20.8	93	12.4
1818	78742.9	5206	26.5	119	15.1
1819	78754.4	8786	72.8	326	9
1820	78771.9	4092	30	134	19.3
1821	78785.6	9843	58.7	263	8
1822	78818.5	8311	199.8	895	9.5
1823	78836.6	4410	189.6	850	17.9
1824	78846.9	6970	178.5	800	11.3
1825	78860.8	5462	77.9	349	14.4
1826	78879.5	7908	35.9	161	10
1827	78916.6	4200	33.9	152	18.8
1828	78927.5	4783	27.1	121	16.5
1829	78966.3	6381	13.2	59	12.4
1830	78988.5	6495	7.8	35	12.2
1831	78998.4	6048	9.8	44	13.1
1832	79016.7	7183	8.3	37	11
1833	79040.1	4630	9.5	43	17.1
1834	79058.3	4027	17	76	19.6
1835	79073.6	3383	19.9	89	23.4
1836	79088.5	6067	25.8	116	13
1837	79140.9	5232	15.2	68	15.1
1838	79154.5	5757	14.5	65	13.8
1839	79174.9	4274	8.9	40	18.5
1840	79223.3	3824	26.8	120	20.7
1841	79237.4	6066	20.3	91	13.1
1842	79243.8	6780	17.9	80	11.7
1843	79301.8	10486	35.7	160	7.6
1844	79334.2	3977	25.3	113	19.9
1845	79354.2	4025	22.1	99	19.7
1846	79378.4	5848	53.7	241	13.6
1847	79412	8519	187.5	840	9.3
1848	79426.4	3851	132.9	595	20.6
1849	79442.6	5590	159.3	714	14.2
1850	79463.2	6083	121.9	546	13.1
1851	79474.2	6724	120.9	542	11.8
1852	79509.7	4917	47.9	214	16.2
1853	79526.3	5120	40.7	182	15.5
1854	79537.9	5196	27.1	121	15.3
1855	79559.7	3990	14.6	65	19.9
1856	79572	7234	13.9	62	11
1857	79584.4	3679	18	81	21.6
1858	79595.3	4631	22	99	17.2
1859	79611.6	4289	25.1	113	18.6
1860	79658.7	5290	28.9	129	15.1
1861	79678.9	4157	13.7	61	19.2
1862	79692.9	8280	8.7	39	9.6
1863	79715.2	4159	29.3	131	19.2
1864	79777.3	3688	30.2	135	21.6
1865	79800.3	6109	16.5	74	13.1
1866	79812.3	4501	14	63	17.7
1867	79868	6454	6.8	31	12.4
1868	79878.1	5324	8.2	37	15
1869	79886.9	6456	5.9	26	12.4
1870	79928.8	4563	5.6	25	17.5
1871	79974.5	5539	30.9	139	14.4
1872	79983.3	5288	33.7	151	15.1
1873	80005.7	5994	109	489	13.3
1874	80013.9	4644	83.8	376	17.2
1875	80035.3	8242	130.7	586	9.7
1876	80068.9	8287	677.9	3037	9.7
1877	80089.2	8256	89.6	402	9.7
1878	80108	6133	189.9	851	13.1
1879	80119.3	5297	177	793	15.1
1880	80129.5	6475	128.7	577	12.4
1881	80160.6	8328	91.9	412	9.6
1882	80204.4	5955	15.8	71	13.5
1883	80264.2	5136	3.9	18	15.6
1884	80318.2	5841	4.4	20	13.8
1885	80371.7	3688	11.4	51	21.8
1886	80410.4	8354	29.6	132	9.6
1887	80417.8	4815	26.9	121	16.7
1888	80453.6	5688	41.2	185	14.1
1889	80465.8	4180	46	206	19.3
1890	80478.1	4552	39	175	17.7
1891	80496.7	6505	14.3	64	12.4
1892	80518.3	4294	21.2	95	18.8
1893	80528.1	4205	17.9	80	19.2
1894	80548.7	3984	14.6	65	20.2
1895	80584.9	6086	9.8	44	13.2
1896	80598.2	7518	21.2	95	10.7
1897	80610	7542	66.7	299	10.7
1898	80628.6	4992	56.2	252	16.2
1899	80662.4	6508	39	175	12.4
1900	80678.1	4191	27.1	121	19.3
1901	80693.5	5464	32	143	14.8
1902	80708.2	4348	16.5	74	18.6
1903	80728.5	4142	25.4	114	19.5
1904	80741.8	4130	43.4	194	19.6
1905	80753.9	4879	35.6	159	16.5
1906	80769.9	6661	22.7	102	12.1
1907	80789.7	4520	7.6	34	17.9
1908	80805.8	5982	16.2	73	13.5
1909	80821	3359	18.5	83	24.1
1910	80863.9	6534	81.5	365	12.4
1911	80871.7	4465	81.4	365	18.1
1912	80918.4	3596	213.9	958	22.5
1913	80953.6	6927	35	157	11.7
1914	80973.2	8413	64.1	287	9.6
1915	80978.7	9473	63.6	285	8.5
1916	80991	4193	91.6	410	19.3
1917	81038.2	6934	19.1	85	11.7
1918	81051.7	4534	21.1	94	17.9
1919	81092.1	3289	19.8	89	24.7
1920	81123	3682	30.7	137	22
1921	81141.1	5365	21.9	98	15.1
1922	81155.8	6213	22.2	99	13.1
1923	81166.8	9838	17.6	79	8.3
1924	81181.6	4644	31.9	143	17.5
1925	81199.9	3585	21.7	97	22.7
1926	81217.7	6771	16.5	74	12
1927	81254.8	8338	16.4	73	9.7
1928	81269.6	4413	10.9	49	18.4
1929	81286.2	9113	19.6	88	8.9
1930	81319.9	8689	84.9	381	9.4
1931	81333.5	4732	33.7	151	17.2
1932	81353.7	5278	70.9	318	15.4
1933	81364.3	5283	48	215	15.4
1934	81385.1	4779	23.1	103	17
1935	81404.8	4554	16.8	75	17.9
1936	81418.6	4378	31.2	140	18.6
1937	81436.1	4230	35.6	160	19.3
1938	81452.3	5151	41.3	185	15.8
1939	81463.7	6970	35.1	157	11.7
1940	81478.1	7407	28.6	128	11
1941	81506.8	3753	34.6	155	21.7
1942	81538.4	3953	16	72	20.6
1943	81579.9	5524	59.2	265	14.8
1944	81613.3	6248	7.1	32	13.1
1945	81646.3	4526	94.7	424	18
1946	81675.8	4833	19.3	87	16.9
1947	81700.1	3714	10.4	47	22
1948	81711	7923	10	45	10.3
1949	81732.3	4820	20.7	93	17
1950	81745.7	3234	12.2	55	25.3
1951	81793.3	4406	16.5	74	18.6
1952	81829.5	5410	4.5	20	15.1
1953	81857.4	5179	30.4	136	15.8
1954	81879.6	6281	108.6	487	13
1955	81910.8	6482	24.7	110	12.6
1956	81944.5	7666	39.6	177	10.7
1957	81965.3	4968	16	72	16.5
1958	81978.1	4416	15.7	70	18.6
1959	81998.8	5964	11.7	52	13.8
1960	82021.3	6279	20.7	93	13.1
1961	82046.4	5534	33.2	149	14.8
1962	82061	7021	33	148	11.7
1963	82086	2714	38.9	174	30.3
1964	82117.2	8878	10.7	48	9.2
1965	82131.4	7935	50.5	226	10.4
1966	82154.3	7029	142.6	639	11.7
1967	82192.9	3307	88.6	397	24.9
1968	82231.4	5980	57.8	259	13.8
1969	82238	6296	62.7	281	13.1
1970	82256	4431	54.9	246	18.6
1971	82321.3	2785	65	291	29.6
1972	82346.1	6304	67.7	303	13.1
1973	82361.1	3523	70.3	315	23.4
1974	82371	3619	65.4	293	22.8
1975	82396.8	5992	37.3	167	13.8
1976	82419.9	3375	36.3	162	24.4
1977	82434.5	4829	22.4	101	17.1
1978	82457.5	3942	23.3	104	20.9
1979	82471.4	4641	27.2	122	17.8
1980	82504.3	10046	35.9	161	8.2
1981	82520.8	4841	15	67	17
1982	82538.2	11087	46.1	207	7.4
1983	82553.3	4556	12.9	58	18.1
1984	82570.7	10240	23.3	104	8.1
1985	82594.9	5461	16.5	74	15.1
1986	82604.1	5689	21.1	94	14.5
1987	82632.5	4470	2.4	11	18.5
1988	82768.8	3543	18.6	83	23.4
1989	82784.3	3958	17.3	78	20.9
1990	82819	5016	25.8	116	16.5
1991	82835.9	3709	29.2	131	22.3
1992	82849.8	6695	20.4	91	12.4
1993	82874.2	6099	84.1	377	13.6
1994	82901.4	8127	53.7	241	10.2
1995	82938	5484	125.2	561	15.1
1996	83007.8	5031	2.6	12	16.5
1997	83031.5	7104	3.9	18	11.7
1998	83082.1	3817	29.7	133	21.8
1999	83130.7	6503	8.1	36	12.8
[truncated: 632 more rows]

## Sheet: 100 um - Peptide Peak Assignmen
#	m/z	Res.	S/N	I	FWHM	% Intensity			Sequence	Mass	Detected Intensity (+/- 3 Da)	Relative Intensity [%]		Top Peaks (#)	Mass	Intensity	Relative Intensity [%]	Assignment
1430	2000.2	11000	0.1	11	0.2	7.9158e-05			PGAFDADPLVVEISEWSHPQFEK	2598.86	40792	0.105023		1	2501.1	13896266	100	GAFDADPLVVEISEWSHPQFEK
1431	2000.9	15772	0.6	48	0.1	0.000345417			GAFDADPLVVEISEWSHPQFEK	2501.74	38757082	99.7835		2	2502.1	9606790	69.1322	GAFDADPLVVEISEWSHPQFEK
1432	2001.2	9773	0.8	73	0.2	0.000525321			AFDADPLVVEISEWSHPQFEK	2444.68	2072	0.00533455		3	2500.1	8753107	62.9889	GAFDADPLVVEISEWSHPQFEK
1433	2001.5	11555	0.4	31	0.2	0.000223082			FDADPLVVEISEWSHPQFEK	2373.6	20301	0.0522667		4	2503.1	4317076	31.0664	GAFDADPLVVEISEWSHPQFEK
1434	2003.6	7890	0.1	13	0.3	9.35503e-05			DADPLVVEISEWSHPQFEK	2226.43	7732	0.0199067		5	2504.1	2065371	14.8628	GAFDADPLVVEISEWSHPQFEK
1435	2004.2	11031	5.4	469	0.2	0.00337501			ADPLVVEISEWSHPQFEK	2111.34	8355	0.0215107		6	2505.1	825133	5.9378	GAFDADPLVVEISEWSHPQFEK
1436	2004.6	6591	4.5	391	0.3	0.00281371			DPLVVEISEWSHPQFEK	2040.26	4838	0.0124559		7	2506.2	284024	2.04389	GAFDADPLVVEISEWSHPQFEK
1437	2004.9	6265	7.2	633	0.3	0.00455518								8	2523.1	237400	1.70837	GAFDADPLVVEISEWSHPQFEK+22
1438	2005.2	6806	6	520	0.3	0.00374201								9	2524.1	184646	1.32875	GAFDADPLVVEISEWSHPQFEK+22
1439	2006.1	4036	97.2	8485	0.5	0.0610596								10	2522.1	174156	1.25326	GAFDADPLVVEISEWSHPQFEK+22
1440	2007.5	7211	3	263	0.3	0.00189259
1441	2008.2	4962	3.1	273	0.4	0.00196456
1442	2008.9	8093	6	527	0.2	0.00379239
1443	2011.6	7390	0.2	17	0.3	0.000122335
1444	2012.3	9405	0.2	20	0.2	0.000143924
1445	2013.1	13644	0.4	35	0.1	0.000251866
1446	2013.6	6765	0.9	75	0.3	0.000539713
1447	2014.1	9184	0.3	24	0.2	0.000172708
1448	2015.2	8475	1.3	117	0.2	0.000841953
1449	2015.7	5912	2.3	198	0.3	0.00142484
1450	2016.1	7601	1.3	112	0.3	0.000805972
1451	2017	4770	11	961	0.4	0.00691553
1452	2018.1	4629	3.4	296	0.4	0.00213007
1453	2019.1	14004	1.3	114	0.1	0.000820364
1454	2019.8	15158	8	699	0.1	0.00503013
1455	2020.6	13742	0.8	68	0.1	0.00048934
1456	2021.3	12178	0.2	22	0.2	0.000158316
1457	2022.1	7501	0.4	36	0.3	0.000259062
1458	2022.5	10517	1.3	116	0.2	0.000834757
1459	2022.9	10418	2.9	257	0.2	0.00184942
1460	2023.3	17417	0.4	37	0.1	0.000266259
1461	2023.7	18692	0.2	14	0.1	0.000100746
1462	2026.2	6465	0.1	12	0.3	8.63541e-05
1463	2027.4	10057	0.1	11	0.2	7.9158e-05
1464	2028.6	9494	0.5	40	0.2	0.000287847
1465	2028.9	13363	3.5	308	0.2	0.00221642
1466	2029.2	15477	1.8	154	0.1	0.00110821
1467	2029.5	9863	1.4	122	0.2	0.000877934
1468	2029.9	14989	0.9	76	0.1	0.00054691
1469	2030.2	12415	0.6	49	0.2	0.000352613
1470	2038.9	18608	9.4	822	0.1	0.00591526
1471	2039.5	10419	0.3	22	0.2	0.000158316
1472	2040	19363	20	1746	0.1	0.0125645
1473	2040.5	9031	3.3	285	0.2	0.00205091
1474	2041	17724	18.1	1580	0.1	0.01137
1475	2041.4	6228	3.5	306	0.3	0.00220203
1476	2041.9	15605	0.6	56	0.1	0.000402986
1477	2043	12575	0.2	21	0.2	0.00015112
1478	2044.1	8601	0.7	63	0.2	0.000453359
1479	2044.4	8440	0.4	38	0.2	0.000273455
1480	2044.9	5810	1.7	150	0.4	0.00107943
1481	2045.2	11378	3.1	270	0.2	0.00194297
1482	2045.5	6908	1.4	125	0.3	0.000899522
1483	2047	11304	0.2	14	0.2	0.000100746
1484	2048.3	13508	0.2	17	0.2	0.000122335
1485	2050.6	9101	0.1	11	0.2	7.9158e-05
1486	2051.3	6296	0.4	35	0.3	0.000251866
1487	2051.5	6897	0.6	52	0.3	0.000374201
1488	2052.2	11527	0.3	24	0.2	0.000172708
1489	2059.8	7105	2.5	220	0.3	0.00158316
1490	2060.2	10904	2.3	202	0.2	0.00145363
1491	2060.6	9408	5	435	0.2	0.00313034
1492	2060.9	6155	9.1	791	0.3	0.00569218
1493	2061.4	9656	4.4	381	0.2	0.00274174
1494	2061.8	11347	0.7	63	0.2	0.000453359
1495	2062.2	11815	0.7	65	0.2	0.000467752
1496	2062.5	14969	1	85	0.1	0.000611675
1497	2062.9	11774	2.2	189	0.2	0.00136008
1498	2063.1	10885	1.3	117	0.2	0.000841953
1499	2063.5	10121	1.5	130	0.2	0.000935503
1500	2064.1	10099	1.5	130	0.2	0.000935503
1501	2064.5	6444	1.8	155	0.3	0.00111541
1502	2064.9	11802	4.2	364	0.2	0.00261941
1503	2065.1	8623	2.5	222	0.2	0.00159755
1504	2065.6	6354	2	179	0.3	0.00128812
1505	2065.9	4717	2.9	252	0.4	0.00181344
1506	2066.9	4152	9.8	855	0.5	0.00615273
1507	2067.2	7517	8.3	725	0.3	0.00521723
1508	2067.4	5573	7.9	693	0.4	0.00498695
1509	2067.9	5170	4.9	432	0.4	0.00310875
1510	2068.2	7573	8.8	768	0.3	0.00552666
1511	2068.5	6895	10.1	878	0.3	0.00631824
1512	2068.9	5174	14.3	1252	0.4	0.00900961
1513	2069.4	5977	6.6	577	0.3	0.00415219
1514	2070.2	9576	0.7	58	0.2	0.000417378
1515	2070.9	8633	0.5	43	0.2	0.000309436
1516	2075	12162	0.2	16	0.2	0.000115139
1517	2079.9	19840	8.2	717	0.1	0.00515966
1518	2081.4	19949	26.1	2274	0.1	0.0163641
1519	2081.8	12771	0.3	29	0.2	0.000208689
1520	2082.2	14065	0.1	12	0.1	8.63541e-05
1521	2082.9	16486	16.5	1444	0.1	0.0103913
1522	2084.5	9197	4	346	0.2	0.00248988
1523	2084.8	5094	3.2	282	0.4	0.00202932
1524	2085.5	6092	3.8	331	0.3	0.00238193
1525	2085.9	5956	5.2	451	0.4	0.00324548
1526	2086.2	5961	4.1	361	0.3	0.00259782
1527	2086.9	9392	2.2	193	0.2	0.00138886
1528	2087.9	17110	3.5	308	0.1	0.00221642
1529	2088.7	17370	0.2	19	0.1	0.000136727
1530	2090.9	11525	0.5	46	0.2	0.000331024
1531	2093.3	14525	0.1	12	0.1	8.63541e-05
1532	2093.7	9326	0.6	51	0.2	0.000367005
1533	2093.9	6127	0.6	56	0.3	0.000402986
1534	2096	14554	0.4	36	0.1	0.000259062
1535	2096.9	13891	0.3	26	0.2	0.000187101
1536	2097.5	9978	0.7	62	0.2	0.000446163
1537	2098.9	10904	0.2	18	0.2	0.000129531
1538	2099.2	12585	0.1	12	0.2	8.63541e-05
1539	2105.7	6645	1.3	115	0.3	0.00082756
1540	2106.8	4304	10.3	901	0.5	0.00648376
1541	2108.2	13358	0.7	59	0.2	0.000424574
1542	2108.8	5956	0.7	59	0.4	0.000424574
1543	2109.5	9596	5.7	500	0.2	0.00359809
1544	2110	18471	24.6	2149	0.1	0.0154646
1545	2110.4	8940	0.1	13	0.2	9.35503e-05
1546	2111	18848	41.5	3625	0.1	0.0260861
1547	2112	18364	20.1	1756	0.1	0.0126365
1548	2113	17015	2.9	253	0.1	0.00182063
1549	2130.8	8523	0.6	49	0.3	0.000352613
1550	2130.9	10699	0.5	45	0.2	0.000323828
1551	2131.2	12941	0.3	30	0.2	0.000215885
1552	2131.5	13610	0.4	37	0.2	0.000266259
1553	2132.2	10799	1.5	127	0.2	0.000913915
1554	2132.5	14971	1.4	122	0.1	0.000877934
1555	2133	9283	1.8	158	0.2	0.001137
1556	2133.5	9505	3	260	0.2	0.00187101
1557	2133.8	6638	3.1	269	0.3	0.00193577
1558	2134.2	7310	4.3	373	0.3	0.00268417
1559	2134.4	7761	3.7	323	0.3	0.00232437
1560	2135.4	7118	68.6	5992	0.3	0.0431195
1561	2136.7	7669	5.7	501	0.3	0.00360529
1562	2137	7569	6.2	537	0.3	0.00386435
1563	2137.5	8534	4.6	400	0.3	0.00287847
1564	2137.9	6967	6	520	0.3	0.00374201
1565	2138.4	6544	2.3	200	0.3	0.00143924
1566	2138.7	11570	4.3	376	0.2	0.00270576
1567	2139	11300	3.1	267	0.2	0.00192138
1568	2139.4	8115	4.5	397	0.3	0.00285688
1569	2139.7	9757	2.6	227	0.2	0.00163353
1570	2140.1	8736	3.3	286	0.2	0.00205811
1571	2140.7	10554	1.9	163	0.2	0.00117298
1572	2141	13026	2.2	194	0.2	0.00139606
1573	2141.3	10873	1.6	140	0.2	0.00100746
1574	2142.4	9016	0.3	25	0.2	0.000179904
1575	2142.9	8369	0.7	65	0.3	0.000467752
1576	2145.1	9064	0.8	69	0.2	0.000496536
1577	2145.4	5713	1.5	135	0.4	0.000971484
1578	2147.5	11952	0.5	42	0.2	0.000302239
1579	2147.9	7852	0.8	67	0.3	0.000482144
1580	2148.6	13752	1.4	119	0.2	0.000856345
1581	2149.4	13107	0.3	28	0.2	0.000201493
1582	2149.9	14166	0.6	55	0.2	0.00039579
1583	2150.8	13609	0.2	18	0.2	0.000129531
1584	2152.5	9125	1.1	92	0.2	0.000662048
1585	2152.8	10140	3.1	274	0.2	0.00197175
1586	2153.2	7177	4.4	382	0.3	0.00274894
1587	2153.5	7198	4.2	371	0.3	0.00266978
1588	2154.3	5513	8.4	735	0.4	0.00528919
1589	2154.8	5971	8.1	705	0.4	0.00507331
1590	2155	9180	6.1	529	0.2	0.00380678
1591	2155.6	7839	0.8	72	0.3	0.000518125
1592	2155.9	7852	1.5	127	0.3	0.000913915
1593	2156.2	8815	2	177	0.2	0.00127372
1594	2156.7	9329	1	85	0.2	0.000611675
1595	2157.5	14899	0.2	19	0.1	0.000136727
1596	2159.1	7693	0.3	27	0.3	0.000194297
1597	2160.2	10404	0.3	27	0.2	0.000194297
1598	2164	14899	0.4	31	0.1	0.000223082
1599	2176.1	12043	0.5	44	0.2	0.000316632
1600	2176.4	12128	0.6	54	0.2	0.000388594
1601	2176.7	10401	1.4	126	0.2	0.000906718
1602	2177.1	6866	3	260	0.3	0.00187101
1603	2177.4	8997	2.2	195	0.2	0.00140325
1604	2179.1	7110	0.9	78	0.3	0.000561302
1605	2180	8407	0.3	25	0.3	0.000179904
1606	2180.4	10267	0.2	13	0.2	9.35503e-05
1607	2181.5	6567	1.1	92	0.3	0.000662048
1608	2182.3	6518	2.7	239	0.3	0.00171989
1609	2182.7	7276	2	177	0.3	0.00127372
1610	2182.8	7430	2.2	189	0.3	0.00136008
1611	2183.1	9689	2.4	209	0.2	0.001504
1612	2186.2	12778	0.3	28	0.2	0.000201493
1613	2186.7	12918	0.1	12	0.2	8.63541e-05
1614	2187.8	7837	4.1	354	0.3	0.00254745
1615	2192.5	6140	4.7	407	0.4	0.00292884
1616	2192.8	3667	5.4	470	0.6	0.0033822
1617	2193.2	6425	4.1	356	0.3	0.00256184
1618	2195	8922	0.2	16	0.2	0.000115139
1619	2195.4	9799	0.6	55	0.2	0.00039579
1620	2195.7	12451	0.2	14	0.2	0.000100746
1621	2196.2	12698	0.1	10	0.2	7.19618e-05
1622	2197	13280	0.1	11	0.2	7.9158e-05
1623	2197.7	10541	0.2	14	0.2	0.000100746
1624	2198.4	9387	0.3	23	0.2	0.000165512
1625	2199	10531	3.2	277	0.2	0.00199334
1626	2199.4	5711	1	86	0.4	0.000618871
1627	2199.7	9522	1.1	97	0.2	0.000698029
1628	2200.1	6332	0.8	70	0.3	0.000503732
1629	2200.7	5194	2.1	180	0.4	0.00129531
1630	2201.1	15585	0.7	57	0.1	0.000410182
1631	2201.4	14543	1.8	153	0.2	0.00110102
1632	2201.8	11857	1.4	124	0.2	0.000892326
1633	2202.3	8522	1.2	109	0.3	0.000784383
1634	2202.7	5936	0.7	63	0.4	0.000453359
1635	2203.1	8432	2.2	190	0.3	0.00136727
1636	2203.5	5116	3.5	307	0.4	0.00220923
1637	2204	7347	3.7	322	0.3	0.00231717
1638	2204.3	7348	4.5	392	0.3	0.0028209
1639	2204.5	7348	5.8	509	0.3	0.00366285
1640	2204.8	6049	7.3	635	0.4	0.00456957
1641	2205.4	5189	6.2	539	0.4	0.00387874
1642	2206.6	5517	86.6	7560	0.4	0.0544031
1643	2206.9	5869	87.6	7648	0.4	0.0550364
1644	2208.5	5330	7.5	655	0.4	0.0047135
1645	2208.8	6428	11.1	971	0.3	0.00698749
1646	2209	6312	9.6	840	0.3	0.00604479
1647	2209.3	6843	8.9	777	0.3	0.00559143
1648	2209.8	5240	4.5	390	0.4	0.00280651
1649	2210.3	6471	3.1	273	0.3	0.00196456
1650	2210.7	5945	4.2	370	0.4	0.00266259
1651	2211	5211	4.9	424	0.4	0.00305118
1652	2211.4	5484	3.8	331	0.4	0.00238193
1653	2211.7	6375	1.8	155	0.3	0.00111541
1654	2212.4	9769	4.9	431	0.2	0.00310155
1655	2212.7	8584	4.7	408	0.3	0.00293604
1656	2212.9	5968	5.7	502	0.4	0.00361248
1657	2213.3	6800	3.4	299	0.3	0.00215166
1658	2214.1	5770	0.9	78	0.4	0.000561302
1659	2214.5	11683	3	264	0.2	0.00189979
1660	2214.8	12568	3	260	0.2	0.00187101
1661	2215.1	11535	3	265	0.2	0.00190699
1662	2215.5	7293	1.3	115	0.3	0.00082756
1663	2215.9	9023	1.4	122	0.2	0.000877934
1664	2216.5	10024	0.8	71	0.2	0.000510929
1665	2216.8	7607	3.9	342	0.3	0.00246109
1666	2217.2	7113	5.1	442	0.3	0.00318071
1667	2217.5	8870	4.2	367	0.3	0.002641
1668	2217.7	7000	6.2	545	0.3	0.00392192
1669	2218.1	4436	5.4	474	0.5	0.00341099
1670	2218.7	8285	2.8	243	0.3	0.00174867
1671	2219	6340	1.6	140	0.3	0.00100746
1672	2219.3	9630	1.6	143	0.2	0.00102905
1673	2221.1	7871	0.6	52	0.3	0.000374201
1674	2221.5	5343	0.4	33	0.4	0.000237474
1675	2225	17043	22.4	1958	0.1	0.0140901
1676	2226	18027	24.3	2122	0.1	0.0152703
1677	2226.5	8418	3	263	0.3	0.00189259
1678	2227	16556	20.6	1798	0.1	0.0129387
1679	2227.6	5473	0.8	73	0.4	0.000525321
1680	2228	14322	7.2	627	0.2	0.004512
1681	2228.4	6444	2.3	201	0.3	0.00144643
1682	2228.6	7289	2.7	235	0.3	0.0016911
1683	2229	10597	3.3	289	0.2	0.0020797
1684	2229.4	7146	1.9	166	0.3	0.00119457
1685	2230.3	6343	8.6	754	0.4	0.00542592
1686	2231.8	5982	0.9	75	0.4	0.000539713
1687	2232.5	4622	0.4	39	0.5	0.000280651
1688	2232.9	6216	0.6	55	0.4	0.00039579
1689	2233.1	7546	0.7	60	0.3	0.000431771
1690	2234.7	6515	1.2	107	0.3	0.000769991
1691	2235.7	6104	0.3	22	0.4	0.000158316
1692	2236	5672	0.3	27	0.4	0.000194297
1693	2236.5	7139	0.5	46	0.3	0.000331024
1694	2237.2	3839	1.4	120	0.6	0.000863541
1695	2237.9	6631	3.2	281	0.3	0.00202213
1696	2238.2	8139	3.1	273	0.3	0.00196456
1697	2238.4	6606	3.1	269	0.3	0.00193577
1698	2238.7	89548	1.9	165	0	0.00118737
1699	2239.3	6803	2	176	0.3	0.00126653
1700	2239.9	6400	5.4	475	0.3	0.00341818
1701	2241.1	7231	1.6	140	0.3	0.00100746
1702	2241.6	9914	0.9	76	0.2	0.00054691
1703	2242.2	7639	1.9	169	0.3	0.00121615
1704	2243.1	8853	3.2	279	0.3	0.00200773
1705	2243.4	7498	2.1	185	0.3	0.00133129
1706	2243.6	7231	2.4	210	0.3	0.0015112
1707	2243.9	6952	2.2	196	0.3	0.00141045
1708	2244.4	10404	1.4	123	0.2	0.00088513
1709	2244.8	9067	1.3	114	0.2	0.000820364
1710	2245	9502	1.2	105	0.2	0.000755599
1711	2245.5	17276	0.4	32	0.1	0.000230278
1712	2245.8	16104	0.2	18	0.1	0.000129531
1713	2246.1	6433	0.2	17	0.3	0.000122335
1714	2247	11912	2	175	0.2	0.00125933
1715	2247.4	9314	1.2	101	0.2	0.000726814
1716	2248	10675	0.9	82	0.2	0.000590087
1717	2248.4	4502	0.5	40	0.5	0.000287847
1718	2249	14148	2.5	217	0.2	0.00156157
1719	2249.5	11881	1.5	131	0.2	0.000942699
1720	2254.4	7221	0.4	33	0.3	0.000237474
1721	2254.7	8767	0.3	25	0.3	0.000179904
1722	2255.8	9997	0.8	69	0.2	0.000496536
1723	2256	11833	1.6	136	0.2	0.00097868
1724	2256.3	8028	1	84	0.3	0.000604479
1725	2257.1	5954	8.1	705	0.4	0.00507331
1726	2259	9709	0.2	17	0.2	0.000122335
1727	2260	11598	2.5	221	0.2	0.00159036
1728	2260.4	8880	2.7	238	0.3	0.00171269
1729	2270.9	5737	0.7	57	0.4	0.000410182
1730	2273.5	16378	0.4	34	0.1	0.00024467
1731	2275	18411	3.4	296	0.1	0.00213007
1732	2276.5	14940	0.2	14	0.2	0.000100746
1733	2278	14193	0.9	76	0.2	0.00054691
1734	2278.4	9076	0.4	38	0.3	0.000273455
1735	2278.8	12214	0.1	11	0.2	7.9158e-05
1736	2281	6727	0.4	36	0.3	0.000259062
1737	2282.7	7609	33.9	2957	0.3	0.0212791
1738	2282.9	5707	29.9	2610	0.4	0.018782
1739	2284	6908	2.2	196	0.3	0.00141045
1740	2284.6	6652	3.3	286	0.3	0.00205811
1741	2285	5007	4.6	399	0.5	0.00287127
1742	2285.6	7414	3.5	304	0.3	0.00218764
1743	2285.9	10084	2.4	213	0.2	0.00153279
1744	2286.5	9865	1.6	138	0.2	0.000993073
1745	2286.9	9847	3.3	289	0.2	0.0020797
1746	2287.1	8302	4.2	366	0.3	0.0026338
1747	2289.6	5928	2.6	229	0.4	0.00164792
1748	2291.2	6075	2.2	191	0.4	0.00137447
1749	2291.5	6491	1.8	161	0.4	0.00115858
1750	2293.1	7644	2.1	183	0.3	0.0013169
1751	2293.3	8994	2.6	224	0.3	0.00161194
1752	2293.6	7536	2.8	245	0.3	0.00176306
1753	2294.1	9944	1.5	128	0.2	0.000921111
1754	2294.6	6684	0.8	73	0.3	0.000525321
1755	2295.5	9341	0.2	18	0.2	0.000129531
1756	2295.9	10030	0.7	59	0.2	0.000424574
1757	2296.2	10777	0.4	34	0.2	0.00024467
1758	2301.5	6962	5.6	488	0.3	0.00351173
1759	2301.8	6698	4.7	409	0.3	0.00294324
1760	2302.1	6302	3	260	0.4	0.00187101
1761	2302.4	6431	1.8	159	0.4	0.00114419
1762	2302.8	7912	1.8	154	0.3	0.00110821
1763	2303.1	6882	1.8	154	0.3	0.00110821
1764	2303.3	7477	2.3	204	0.3	0.00146802
1765	2303.9	13333	2.3	203	0.2	0.00146082
1766	2304.3	8236	0.3	27	0.3	0.000194297
1767	2304.6	9730	0.4	38	0.2	0.000273455
1768	2305.1	13343	0.8	67	0.2	0.000482144
1769	2305.8	13694	0.2	13	0.2	9.35503e-05
1770	2306.5	7465	0.2	14	0.3	0.000100746
1771	2307	10270	0.2	20	0.2	0.000143924
1772	2307.4	10477	0.4	38	0.2	0.000273455
1773	2307.9	8707	1	89	0.3	0.00064046
1774	2308.2	7163	0.4	39	0.3	0.000280651
1775	2309.3	8453	0.1	10	0.3	7.19618e-05
1776	2309.6	8669	0.2	18	0.3	0.000129531
1777	2311.1	5527	3.8	329	0.4	0.00236754
1778	2311.5	7119	5.1	449	0.3	0.00323108
1779	2311.8	7942	4.9	431	0.3	0.00310155
1780	2312.1	12982	6.9	600	0.2	0.00431771
1781	2312.4	6556	3.9	345	0.4	0.00248268
1782	2312.7	6661	3.4	298	0.3	0.00214446
1783	2313.6	13193	0.1	12	0.2	8.63541e-05
1784	2314	10440	0.4	39	0.2	0.000280651
1785	2314.5	8726	0.5	43	0.3	0.000309436
1786	2315.1	13614	0.2	18	0.2	0.000129531
1787	2316	12233	0.3	27	0.2	0.000194297
1788	2316.5	10930	0.4	34	0.2	0.00024467
1789	2316.8	6344	0.2	18	0.4	0.000129531
1790	2317.2	6730	0.3	27	0.3	0.000194297
1791	2318.1	9287	1	90	0.2	0.000647656
1792	2318.5	12616	1.3	113	0.2	0.000813168
1793	2318.9	12881	0.1	13	0.2	9.35503e-05
1794	2319.2	11352	0.2	18	0.2	0.000129531
1795	2319.4	9695	0.3	26	0.2	0.000187101
1796	2319.6	8445	0.3	24	0.3	0.000172708
1797	2319.9	10169	0.7	58	0.2	0.000417378
1798	2323.8	7554	0.4	32	0.3	0.000230278
1799	2324.2	9553	1.2	108	0.2	0.000777187
1800	2324.5	6104	1.5	130	0.4	0.000935503
1801	2325.1	7720	4.2	364	0.3	0.00261941
1802	2325.5	7337	5.3	460	0.3	0.00331024
1803	2325.8	6209	6.3	553	0.4	0.00397949
1804	2326	6646	4.4	385	0.3	0.00277053
1805	2326.5	6161	4.7	413	0.4	0.00297202
1806	2327	8041	3.8	332	0.3	0.00238913
1807	2327.3	8106	2.1	183	0.3	0.0013169
1808	2327.7	5383	2.4	211	0.4	0.00151839
1809	2328.2	13680	2.1	184	0.2	0.0013241
1810	2328.6	10888	1.5	129	0.2	0.000928307
1811	2329.1	15210	2.4	210	0.2	0.0015112
1812	2329.8	7175	1.1	98	0.3	0.000705225
1813	2330	9028	1.5	134	0.3	0.000964288
1814	2330.5	7768	1.9	163	0.3	0.00117298
1815	2331.1	13690	1.4	118	0.2	0.000849149
1816	2331.5	8662	0.5	47	0.3	0.00033822
1817	2332.1	11094	2.3	198	0.2	0.00142484
1818	2332.6	8712	3.7	319	0.3	0.00229558
1819	2333	10263	4.4	383	0.2	0.00275614
1820	2333.4	6670	1.9	164	0.3	0.00118017
1821	2333.7	11499	0.6	48	0.2	0.000345417
1822	2334.4	7207	2.4	205	0.3	0.00147522
1823	2334.8	14602	3.6	318	0.2	0.00228838
1824	2336.9	12877	0.3	25	0.2	0.000179904
1825	2339.6	17036	0.5	43	0.1	0.000309436
1826	2339.9	9205	0.1	11	0.3	7.9158e-05
1827	2341.1	14168	0.6	52	0.2	0.000374201
1828	2341.4	6340	0.1	11	0.4	7.9158e-05
1829	2342	14768	1.1	94	0.2	0.000676441
1830	2342.4	9478	0.3	29	0.2	0.000208689
1831	2342.8	8955	0.8	67	0.3	0.000482144
1832	2343.1	9833	1.1	100	0.2	0.000719618
1833	2344	5913	2.3	203	0.4	0.00146082
1834	2345	8646	0.1	10	0.3	7.19618e-05
1835	2346.6	5781	3.7	327	0.4	0.00235315
1836	2347.1	12496	2.5	218	0.2	0.00156877
1837	2347.8	15248	1.4	126	0.2	0.000906718
1838	2348.3	15052	1.8	160	0.2	0.00115139
1839	2348.7	11058	0.7	62	0.2	0.000446163
1840	2349	12123	1.3	114	0.2	0.000820364
1841	2349.5	11035	0.5	46	0.2	0.000331024
1842	2350	7238	0.7	61	0.3	0.000438967
1843	2350.4	12796	3	264	0.2	0.00189979
1844	2350.7	9214	2.3	197	0.3	0.00141765
1845	2351.8	5226	4.5	389	0.4	0.00279931
1846	2352.7	3952	1.9	168	0.6	0.00120896
1847	2354.1	6385	3.6	317	0.4	0.00228119
1848	2355.1	4958	16	1394	0.5	0.0100315
1849	2355.5	4959	14.3	1252	0.5	0.00900961
1850	2357	8907	0.8	69	0.3	0.000496536
1851	2358	6102	3.4	300	0.4	0.00215885
1852	2359	17210	28.6	2498	0.1	0.0179761
1853	2359.6	7230	1.2	106	0.3	0.000762795
1854	2360.1	7525	1.6	142	0.3	0.00102186
1855	2360.5	4850	3.7	322	0.5	0.00231717
1856	2361.5	5384	1.9	163	0.4	0.00117298
1857	2362	14265	19.1	1666	0.2	0.0119888
1858	2362.6	5907	6.5	570	0.4	0.00410182
1859	2364.3	8597	95.9	8368	0.3	0.0602176
1860	2365.7	11496	13.8	1201	0.2	0.00864261
1861	2366.3	13408	34.3	2991	0.2	0.0215238
1862	2366.6	8823	15.1	1314	0.3	0.00945578
1863	2366.9	12810	35.5	3096	0.2	0.0222794
1864	2367.5	12277	4.5	391	0.2	0.00281371
1865	2369.5	4776	5.1	441	0.5	0.00317351
1866	2369.9	8950	4.9	432	0.3	0.00310875
1867	2370.2	5718	4.4	386	0.4	0.00277772
1868	2370.7	7227	4.4	384	0.3	0.00276333
1869	2371.1	11341	6.8	592	0.2	0.00426014
1870	2371.6	7106	0.5	40	0.3	0.000287847
1871	2372.1	20908	36.1	3151	0.1	0.0226752
1872	2372.6	9317	0.7	60	0.3	0.000431771
1873	2373.1	18245	95.7	8355	0.1	0.0601241
1874	2373.5	6811	1	87	0.3	0.000626067
1875	2374.1	19209	50.5	4408	0.1	0.0317208
1876	2374.8	10491	2.2	194	0.2	0.00139606
1877	2375.1	18609	22.1	1927	0.1	0.013867
1878	2375.4	10997	2.6	228	0.2	0.00164073
1879	2376.1	18872	9.3	816	0.1	0.00587208
1880	2376.5	6965	0.7	59	0.3	0.000424574
1881	2377.1	15108	4.2	367	0.2	0.002641
1882	2377.9	8751	0.4	34	0.3	0.00024467
1883	2378.4	6265	0.6	55	0.4	0.00039579
1884	2378.8	13344	2.1	180	0.2	0.00129531
1885	2379.1	11626	1.5	134	0.2	0.000964288
1886	2379.5	6107	0.7	57	0.4	0.000410182
1887	2380.2	12230	0.5	46	0.2	0.000331024
1888	2380.6	9039	0.5	47	0.3	0.00033822
1889	2383.9	10785	3.4	301	0.2	0.00216605
1890	2384.2	9250	4.1	358	0.3	0.00257623
1891	2388	13302	0.2	15	0.2	0.000107943
1892	2388.4	10858	0.2	18	0.2	0.000129531
1893	2389.2	8318	2	173	0.3	0.00124494
1894	2389.5	10156	0.8	66	0.2	0.000474948
1895	2391.4	5108	0.2	21	0.5	0.00015112
1896	2391.8	5992	0.4	33	0.4	0.000237474
1897	2392.1	9534	0.6	50	0.3	0.000359809
1898	2394.1	16772	1.5	131	0.1	0.000942699
1899	2395.1	17562	3.8	334	0.1	0.00240352
1900	2397.1	12497	1.1	98	0.2	0.000705225
1901	2398.1	6852	2.9	253	0.3	0.00182063
1902	2398.7	7468	5.1	446	0.3	0.0032095
1903	2399	5885	3.6	317	0.4	0.00228119
1904	2399.8	6395	1.9	169	0.4	0.00121615
1905	2400.4	6044	1	85	0.4	0.000611675
1906	2401.1	7224	0.8	72	0.3	0.000518125
1907	2402.6	6661	1.1	99	0.4	0.000712422
1908	2403	8746	0.6	55	0.3	0.00039579
1909	2403.6	9317	0.5	48	0.3	0.000345417
1910	2404.1	13450	4.5	393	0.2	0.0028281
1911	2404.6	8744	0.3	28	0.3	0.000201493
1912	2405.1	8262	1.3	116	0.3	0.000834757
1913	2405.5	9714	0.6	54	0.2	0.000388594
1914	2406.1	11338	0.5	46	0.2	0.000331024
1915	2406.6	6581	0.2	20	0.4	0.000143924
1916	2407.3	6808	0.3	28	0.4	0.000201493
1917	2407.7	11343	0.7	58	0.2	0.000417378
1918	2408.1	8232	0.2	22	0.3	0.000158316
1919	2408.4	7714	0.2	16	0.3	0.000115139
1920	2409.3	7440	1.3	115	0.3	0.00082756
1921	2409.6	7300	1.2	108	0.3	0.000777187
1922	2410	9109	2.5	214	0.3	0.00153998
1923	2410.3	11901	3.4	298	0.2	0.00214446
1924	2410.7	7644	2.2	193	0.3	0.00138886
1925	2411	12914	4	348	0.2	0.00250427
1926	2411.4	7325	0.6	55	0.3	0.00039579
1927	2412	10737	5.8	510	0.2	0.00367005
1928	2413.1	6477	0.8	71	0.4	0.000510929
1929	2413.7	14939	0.8	74	0.2	0.000532517
1930	2414.1	8868	0.4	31	0.3	0.000223082
1931	2415.9	9120	1.5	131	0.3	0.000942699
1932	2416.1	13089	1.1	100	0.2	0.000719618
1933	2417.7	12601	0.1	10	0.2	7.19618e-05
1934	2420	8894	0.3	29	0.3	0.000208689
1935	2420.5	9109	1	87	0.3	0.000626067
1936	2421	9017	0.7	61	0.3	0.000438967
1937	2421.7	9276	0.1	11	0.3	7.9158e-05
1938	2422.1	21350	68.3	5961	0.1	0.0428964
1939	2422.6	9994	0.2	15	0.2	0.000107943
1940	2423	7239	0.4	34	0.3	0.00024467
1941	2423.6	23087	55.1	4811	0.1	0.0346208
1942	2424	12499	1	88	0.2	0.000633264
1943	2424.2	11706	0.8	67	0.2	0.000482144
1944	2424.8	17890	0.8	65	0.1	0.000467752
1945	2425.1	22024	23.2	2027	0.1	0.0145867
1946	2425.6	8751	1	91	0.3	0.000654852
1947	2426.2	10416	2.8	241	0.2	0.00173428
1948	2426.6	18289	14.4	1253	0.1	0.00901681
1949	2427	8585	2.4	210	0.3	0.0015112
1950	2427.6	7915	0.6	53	0.3	0.000381397
1951	2428.1	12957	4	346	0.2	0.00248988
1952	2428.6	11901	0.6	52	0.2	0.000374201
1953	2429.1	11760	1.6	143	0.2	0.00102905
1954	2429.6	7250	1	88	0.3	0.000633264
1955	2430.1	6498	3	264	0.4	0.00189979
1956	2430.7	5664	9.5	827	0.4	0.00595124
1957	2431	6197	9.9	861	0.4	0.00619591
1958	2432.1	15741	0.9	78	0.2	0.000561302
1959	2432.6	15042	1.2	104	0.2	0.000748402
1960	2433	13741	0.7	58	0.2	0.000417378
1961	2433.3	12638	0.3	22	0.2	0.000158316
1962	2433.9	8295	3.1	273	0.3	0.00196456
1963	2434.2	10109	3.7	326	0.2	0.00234595
1964	2434.5	8092	3.5	304	0.3	0.00218764
1965	2435	9194	1	91	0.3	0.000654852
1966	2435.3	8147	0.8	73	0.3	0.000525321
1967	2435.8	6211	3.1	273	0.4	0.00196456
1968	2436.1	9591	5.1	443	0.3	0.00318791
1969	2437.3	15420	0.6	51	0.2	0.000367005
1970	2437.6	12874	0.2	14	0.2	0.000100746
1971	2438.5	9920	0.6	51	0.2	0.000367005
1972	2438.8	7469	0.6	55	0.3	0.00039579
1973	2439.2	13273	2.1	181	0.2	0.00130251
1974	2439.5	5679	0.3	24	0.4	0.000172708
1975	2440.1	7203	0.4	36	0.3	0.000259062
1976	2440.7	6812	0.6	50	0.4	0.000359809
1977	2442.2	14145	1.1	94	0.2	0.000676441
1978	2442.5	9611	0.2	14	0.3	0.000100746
1979	2445.6	3543	14.5	1268	0.7	0.00912475
1980	2446	10324	8	696	0.2	0.00500854
1981	2449.6	7374	1.9	165	0.3	0.00118737
1982	2450.6	7090	0.2	13	0.3	9.35503e-05
1983	2451.9	5769	59.6	5205	0.4	0.0374561
1984	2452.8	7504	12.3	1077	0.3	0.00775028
1985	2453.2	6997	6.2	544	0.4	0.00391472
1986	2453.7	9319	5.3	461	0.3	0.00331744
1987	2453.9	7011	5.6	493	0.3	0.00354772
1988	2454.1	8345	4.8	419	0.3	0.0030152
1989	2454.4	10226	3.6	314	0.2	0.0022596
1990	2455	8981	0.2	15	0.3	0.000107943
1991	2456.3	9825	4	353	0.3	0.00254025
1992	2456.6	6185	5	440	0.4	0.00316632
1993	2457.6	6800	3.9	338	0.4	0.00243231
1994	2458.2	6260	3.7	319	0.4	0.00229558
1995	2458.6	5464	4.3	373	0.4	0.00268417
1996	2459.2	12996	2.2	190	0.2	0.00136727
1997	2459.4	10507	1.2	106	0.2	0.000762795
1998	2459.7	9813	1.3	118	0.3	0.000849149
1999	2460.2	7813	1.3	116	0.3	0.000834757
2000	2460.6	7030	2.2	195	0.3	0.00140325
2001	2461	6885	3.3	289	0.4	0.0020797
2002	2461.3	8741	3.4	296	0.3	0.00213007
2003	2462.7	8209	4.4	384	0.3	0.00276333
2004	2463	5675	6.1	534	0.4	0.00384276
2005	2465.4	14342	0.5	44	0.2	0.000316632
2006	2465.8	13284	0.2	16	0.2	0.000115139
2007	2466.2	16823	8.1	708	0.1	0.00509489
2008	2466.6	8876	2	171	0.3	0.00123055
2009	2466.8	14820	1.4	125	0.2	0.000899522
2010	2467.2	18752	13.4	1172	0.1	0.00843392
2011	2467.7	6826	2.7	236	0.4	0.0016983
2012	2468.1	17665	7.8	682	0.1	0.00490779
2013	2469.2	17499	3.8	331	0.1	0.00238193
2014	2469.5	11580	2.5	216	0.2	0.00155437
2015	2469.8	12813	4.1	357	0.2	0.00256904
2016	2470.1	18900	17.8	1555	0.1	0.0111901
2017	2470.5	13417	2.6	229	0.2	0.00164792
2018	2471.1	17647	12.6	1104	0.1	0.00794458
2019	2471.7	7579	1.9	168	0.3	0.00120896
2020	2472.1	17877	16.4	1429	0.1	0.0102833
2021	2472.5	11319	4.5	392	0.2	0.0028209
2022	2472.8	14820	1.4	126	0.2	0.000906718
2023	2473.1	19203	10.3	900	0.1	0.00647656
2024	2474.1	17924	4.6	398	0.1	0.00286408
2025	2474.6	9794	0.2	17	0.3	0.000122335
2026	2475.2	9912	2.2	192	0.2	0.00138167
2027	2475.6	6178	1.6	137	0.4	0.000985876
2028	2476.1	14412	2.7	237	0.2	0.00170549
2029	2476.4	12743	0.4	33	0.2	0.000237474
2030	2477.1	13580	0.1	11	0.2	7.9158e-05
2031	2478.1	14302	0.1	12	0.2	8.63541e-05
2032	2480.7	11961	0.3	22	0.2	0.000158316
2033	2481.1	7796	0.9	78	0.3	0.000561302
2034	2481.4	10190	0.5	43	0.2	0.000309436
2035	2481.8	13640	0.2	18	0.2	0.000129531
2036	2482.1	20885	20	1747	0.1	0.0125717
2037	2482.5	13223	0.3	28	0.2	0.000201493
2038	2482.8	15449	0.7	59	0.2	0.000424574
2039	2483.1	20778	60.2	5252	0.1	0.0377943
2040	2483.5	13609	0.6	55	0.2	0.00039579
2041	2483.8	13321	0.5	43	0.2	0.000309436
2042	2484.1	18542	46.2	4035	0.1	0.0290366
2043	2484.5	6211	3.1	271	0.4	0.00195016
2044	2484.8	9036	2.8	248	0.3	0.00178465
2045	2485.1	16708	40	3488	0.1	0.0251003
2046	2486.1	13550	38.8	3383	0.2	0.0243447
2047	2486.8	9054	4.1	360	0.3	0.00259062
2048	2487.1	15242	34.8	3035	0.2	0.0218404
2049	2487.7	6390	3.5	309	0.4	0.00222362
2050	2488.1	14518	26	2266	0.2	0.0163065
2051	2488.8	9187	2.8	241	0.3	0.00173428
2052	2489.1	12981	13.8	1208	0.2	0.00869298
2053	2489.7	5510	3.6	315	0.5	0.0022668
2054	2490.1	12674	11.3	984	0.2	0.00708104
2055	2491.1	18402	72.6	6342	0.1	0.0456382
2056	2491.6	9424	4.6	399	0.3	0.00287127
2057	2491.7	9419	5.5	477	0.3	0.00343258
2058	2492.1	18992	90	7855	0.1	0.056526
2059	2492.6	9471	9.8	853	0.3	0.00613834
2060	2493.1	17499	70.1	6120	0.1	0.0440406
2061	2493.6	5926	6.2	543	0.4	0.00390752
2062	2494.1	17320	44.9	3918	0.1	0.0281946
2063	2494.7	4527	18.3	1595	0.6	0.0114779
2064	2495.1	10307	31.8	2773	0.2	0.019955
2065	2495.6	6766	15.6	1361	0.4	0.009794
2066	2495.8	7131	16.4	1436	0.3	0.0103337
2067	2496.2	6158	22.6	1973	0.4	0.0141981
2068	2496.6	5548	26	2272	0.4	0.0163497
2069	2497.1	6243	34.1	2974	0.4	0.0214014
2070	2498.1	6024	85.5	7466	0.4	0.0537267
2071	2499.1	6429	189.7	16562	0.4	0.119183
2072	2499.6	11806	180.8	15780	0.2	0.113556
2073	2500.1	24656	100272	8753107	0.1	62.9889
2074	2500.6	21884	351.1	30645	0.1	0.220527
2075	2501.1	25285	159191	13896266	0.1	100
2076	2501.7	21301	211.5	18462	0.1	0.132856
2077	2502.1	25287	110052	9606790	0.1	69.1322
2078	2502.7	18759	169.7	14812	0.1	0.10659
2079	2503.1	26132	49454.9	4317076	0.1	31.0664
2080	2503.7	16259	154.4	13476	0.2	0.0969757
2081	2504.1	25734	23660.1	2065371	0.1	14.8628
2082	2504.7	17776	100.1	8735	0.1	0.0628586
2083	2505.1	25697	9452.4	825133	0.1	5.9378
2084	2505.7	14479	104.2	9093	0.2	0.0654348
2085	2506.2	25131	3253.7	284024	0.1	2.04389
2086	2506.7	10177	54	4717	0.2	0.0339444
2087	2507.2	24055	893.6	78004	0.1	0.561331
2088	2507.7	10058	42.6	3715	0.2	0.0267338
2089	2508.2	19828	231.8	20233	0.1	0.1456
2090	2508.6	8833	28.1	2449	0.3	0.0176234
2091	2508.8	11647	19.3	1680	0.2	0.0120896
2092	2509.2	15621	63.7	5557	0.2	0.0399892
2093	2509.6	5552	19.8	1731	0.5	0.0124566
2094	2510.2	8928	21.1	1839	0.3	0.0132338
2095	2510.7	6695	10	876	0.4	0.00630385
2096	2511.2	6536	10.1	880	0.4	0.00633264
2097	2511.7	7385	8	700	0.3	0.00503732
2098	2512.1	7425	19.7	1722	0.3	0.0123918
2099	2512.4	9136	15	1312	0.3	0.00944139
2100	2512.6	8375	14.4	1257	0.3	0.0090456
2101	2513.1	11088	23.9	2085	0.2	0.015004
2102	2513.7	10178	12.8	1117	0.2	0.00803813
2103	2514.1	21459	184.7	16126	0.1	0.116046
2104	2514.6	10591	9.1	791	0.2	0.00569218
2105	2515.1	24857	292.2	25504	0.1	0.183531
2106	2515.6	13834	5.7	498	0.2	0.0035837
2107	2516.1	24322	440.5	38454	0.1	0.276722
2108	2516.6	18054	6.2	542	0.1	0.00390033
2109	2517.1	24678	449.2	39215	0.1	0.282198
2110	2517.6	11071	5	434	0.2	0.00312314
2111	2518.1	22788	279.5	24400	0.1	0.175587
2112	2518.6	15919	4.3	379	0.2	0.00272735
2113	2519.1	24209	170.3	14868	0.1	0.106993
2114	2519.6	14238	2	178	0.2	0.00128092
2115	2520.1	21473	107.2	9358	0.1	0.0673418
2116	2520.6	17231	2.4	212	0.1	0.00152559
2117	2521.1	17431	47.2	4123	0.1	0.0296698
2118	2521.7	12838	3.2	279	0.2	0.00200773
2119	2522.1	23414	1995.1	174156	0.1	1.25326
2120	2522.6	15395	6.7	589	0.2	0.00423855
2121	2523.1	24326	2719.6	237400	0.1	1.70837
2122	2523.6	19529	14.1	1227	0.1	0.00882971
2123	2524.1	24594	2115.2	184646	0.1	1.32875
2124	2524.6	19966	14.5	1263	0.1	0.00908877
2125	2525.1	24076	1140.3	99544	0.1	0.716336
2126	2525.6	17029	7.7	668	0.1	0.00480705
2127	2526.1	23728	495.2	43228	0.1	0.311076
2128	2526.6	16936	14.7	1286	0.1	0.00925428
2129	2527.1	24584	338.8	29573	0.1	0.212813
2130	2527.6	21580	24.7	2156	0.1	0.015515
2131	2528.1	23791	309	26974	0.1	0.19411
2132	2528.6	21790	22.9	1999	0.1	0.0143852
2133	2529.1	23803	239.7	20924	0.1	0.150573
2134	2529.6	20371	13.9	1211	0.1	0.00871457
2135	2530.1	23415	152.9	13343	0.1	0.0960186
2136	2530.6	18974	7.8	680	0.1	0.0048934
2137	2531.1	22940	90.4	7894	0.1	0.0568066
2138	2531.6	19330	12.3	1074	0.1	0.00772869
2139	2532.1	25649	223	19464	0.1	0.140066
2140	2532.6	19189	6.7	583	0.1	0.00419537
2141	2533.1	25786	272.2	23760	0.1	0.170981
2142	2533.6	17780	2.9	252	0.1	0.00181344
2143	2534.1	25034	194	16933	0.1	0.121853
2144	2534.6	17755	2.4	209	0.1	0.001504
2145	2535.1	24742	107.5	9387	0.1	0.0675505
2146	2535.6	14091	1.5	131	0.2	0.000942699
2147	2536.1	21969	48.4	4222	0.1	0.0303823
2148	2536.5	11123	3.6	315	0.2	0.0022668
2149	2536.8	10121	3.3	285	0.3	0.00205091
2150	2537.1	19088	33	2881	0.1	0.0207322
2151	2537.6	11240	2.8	242	0.2	0.00174148
2152	2538.1	24112	722.9	63101	0.1	0.454086
2153	2538.6	18731	6.4	560	0.1	0.00402986
2154	2539.1	24135	1015	88606	0.1	0.637625
2155	2539.6	18129	10.9	950	0.1	0.00683637
2156	2540.1	24060	823.1	71849	0.1	0.517038
2157	2540.6	10532	8.8	768	0.2	0.00552666
2158	2541.1	19143	444.4	38789	0.1	0.279133
2159	2541.6	10166	41.6	3628	0.3	0.0261077
2160	2542.1	16995	360.8	31497	0.1	0.226658
2161	2542.6	7558	20	1742	0.3	0.0125357
2162	2543.1	20115	298.9	26096	0.1	0.187791
2163	2543.7	9917	43	3749	0.3	0.0269785
2164	2544.1	20343	306.4	26743	0.1	0.192447
2165	2544.5	10934	32.9	2874	0.2	0.0206818
2166	2545.1	20865	239.4	20894	0.1	0.150357
2167	2545.7	9676	50.3	4387	0.3	0.0315696
2168	2546.1	14930	213.3	18616	0.2	0.133964
2169	2546.5	8879	62.9	5491	0.3	0.0395142
2170	2547.1	20369	194.5	16980	0.1	0.122191
2171	2547.5	11650	14.5	1263	0.2	0.00908877
2172	2548.1	18731	57.6	5028	0.1	0.0361824
2173	2548.6	6576	13.8	1207	0.4	0.00868579
2174	2549.1	20084	117.6	10265	0.1	0.0738688
2175	2549.5	8734	17.5	1530	0.3	0.0110102
2176	2550.1	19530	63.3	5524	0.1	0.0397517
2177	2550.6	8228	13.1	1147	0.3	0.00825402
2178	2551.1	20351	96.1	8391	0.1	0.0603831
2179	2551.6	9824	12.8	1114	0.3	0.00801654
2180	2552.1	21039	69.7	6081	0.1	0.04376
2181	2552.6	16985	13.5	1180	0.2	0.00849149
2182	2553	24287	399.6	34884	0.1	0.251031
2183	2553.5	17425	10.4	912	0.1	0.00656291
2184	2554.1	24213	542.1	47325	0.1	0.340559
2185	2554.6	17489	7.4	644	0.1	0.00463434
2186	2555.1	24376	430.6	37584	0.1	0.270461
2187	2555.6	14239	10	874	0.2	0.00628946
2188	2556.1	23088	417.4	36432	0.1	0.262171
2189	2556.5	14888	5.1	444	0.2	0.0031951
2190	2557.1	23645	315.2	27513	0.1	0.197988
2191	2557.6	15431	11.3	986	0.2	0.00709543
2192	2558.1	23386	204.2	17825	0.1	0.128272
2193	2558.6	14327	6.2	538	0.2	0.00387154
2194	2559.1	23285	150	13098	0.1	0.0942555
2195	2559.6	17117	5.6	490	0.1	0.00352613
2196	2560.1	22903	144.5	12610	0.1	0.0907438
2197	2560.6	10549	7	615	0.2	0.00442565
2198	2561.1	23006	119.5	10431	0.1	0.0750633
2199	2561.6	8483	7.8	685	0.3	0.00492938
2200	2562.1	20780	101.6	8866	0.1	0.0638013
2201	2562.5	10045	13.6	1188	0.3	0.00854906
2202	2563.1	21567	72.1	6297	0.1	0.0453143
2203	2563.6	6876	7.6	659	0.4	0.00474228
2204	2564.1	21506	66.9	5844	0.1	0.0420545
2205	2564.6	10969	5	433	0.2	0.00311594
2206	2565.1	16024	49.9	4355	0.2	0.0313394
2207	2565.6	10665	4	353	0.2	0.00254025
2208	2566.1	21237	64.2	5603	0.1	0.0403202
2209	2566.6	16813	7.3	639	0.2	0.00459836
2210	2567.1	16709	50.5	4406	0.2	0.0317064
2211	2567.5	9376	4.8	423	0.3	0.00304398
2212	2568	12593	24.5	2136	0.2	0.015371
2213	2568.6	6938	3.2	284	0.4	0.00204371
2214	2569.1	11821	15.8	1379	0.2	0.00992353
2215	2569.7	9350	1.1	98	0.3	0.000705225
2216	2570.1	18189	18.4	1604	0.1	0.0115427
2217	2570.7	18851	34.8	3040	0.1	0.0218764
2218	2571.1	18153	26.1	2283	0.1	0.0164289
2219	2571.6	12140	2.5	222	0.2	0.00159755
2220	2572.2	21742	53	4629	0.1	0.0333111
2221	2572.6	13509	3.7	324	0.2	0.00233156
2222	2573.2	18586	32.4	2832	0.1	0.0203796
2223	2573.7	24564	79.8	6968	0.1	0.050143
2224	2574.1	18433	21.1	1845	0.1	0.0132769
2225	2574.6	14137	5.4	469	0.2	0.00337501
2226	2575.1	20462	75.4	6579	0.1	0.0473437
2227	2575.6	11373	10.8	947	0.2	0.00681478
2228	2576.1	17834	38.6	3372	0.1	0.0242655
2229	2576.6	19486	38.9	3394	0.1	0.0244238
2230	2577.1	18989	41.1	3588	0.1	0.0258199
2231	2577.6	9254	13.1	1139	0.3	0.00819645
2232	2578.1	15295	40.9	3570	0.2	0.0256904
2233	2578.6	7904	9.8	856	0.3	0.00615993
2234	2579	19857	31.1	2719	0.1	0.0195664
2235	2579.6	12921	13	1136	0.2	0.00817486
2236	2580.1	19071	34	2967	0.1	0.0213511
2237	2580.5	7011	7.9	688	0.4	0.00495097
2238	2581.1	19944	33.3	2907	0.1	0.0209193
2239	2581.6	10115	6.4	561	0.3	0.00403706
2240	2582.1	20062	67.1	5857	0.1	0.042148
2241	2582.7	10775	7.2	630	0.2	0.00453359
2242	2583.1	16874	108	9430	0.2	0.06786
2243	2583.5	9138	6.9	606	0.3	0.00436088
2244	2584.1	19023	60.3	5263	0.1	0.0378735
2245	2584.7	13088	3.1	273	0.2	0.00196456
2246	2585.1	18531	37.2	3251	0.1	0.0233948
2247	2585.6	8116	4.8	415	0.3	0.00298641
2248	2586.1	18996	24	2094	0.1	0.0150688
2249	2586.6	12224	3.5	310	0.2	0.00223082
2250	2587.1	16149	17.2	1500	0.2	0.0107943
2251	2587.7	11914	2.2	191	0.2	0.00137447
2252	2588.1	17222	15.6	1358	0.2	0.00977241
2253	2588.6	10012	1.9	168	0.3	0.00120896
2254	2589	20708	28.2	2463	0.1	0.0177242
2255	2589.5	13316	2.5	221	0.2	0.00159036
2256	2590	21902	30.3	2642	0.1	0.0190123
2257	2590.6	14131	3	265	0.2	0.00190699
2258	2591	20907	37.9	3308	0.1	0.023805
2259	2591.6	11882	3.2	281	0.2	0.00202213
2260	2592	21199	39.1	3415	0.1	0.0245749
2261	2592.7	9284	2.9	257	0.3	0.00184942
2262	2593	18426	27.8	2423	0.1	0.0174363
2263	2593.3	9514	7.7	676	0.3	0.00486462
2264	2593.6	7234	7.1	616	0.4	0.00443285
2265	2594	16440	26.9	2345	0.2	0.016875
2266	2594.6	5074	10.7	936	0.5	0.00673562
2267	2595	14688	23.4	2045	0.2	0.0147162
2268	2595.4	6921	7	608	0.4	0.00437528
2269	2595.6	8652	6.7	584	0.3	0.00420257
2270	2596	9964	18.9	1647	0.3	0.0118521
2271	2596.5	5469	6.4	559	0.5	0.00402266
2272	2597.1	12434	33.6	2933	0.2	0.0211064
2273	2597.6	10844	5.3	461	0.2	0.00331744
2274	2598.1	23115	119.9	10468	0.1	0.0753296
2275	2598.6	12984	5.1	448	0.2	0.00322389
2276	2599.1	22662	108.5	9469	0.1	0.0681406
2277	2599.6	14432	10	875	0.2	0.00629666
2278	2600.1	20202	83.5	7290	0.1	0.0524601
2279	2600.6	14672	6.1	530	0.2	0.00381397
2280	2601.1	22705	66.9	5842	0.1	0.0420401
2281	2601.5	16708	3.1	270	0.2	0.00194297
2282	2602.1	22388	51.8	4522	0.1	0.0325411
2283	2602.6	12599	1.4	126	0.2	0.000906718
2284	2603.1	22045	33.2	2902	0.1	0.0208833
2285	2603.6	10657	4.6	399	0.2	0.00287127
2286	2604.1	20786	31.1	2713	0.1	0.0195232
2287	2604.5	9582	5.2	452	0.3	0.00325267
2288	2605.1	16013	19	1658	0.2	0.0119313
2289	2605.5	10559	4.8	418	0.2	0.003008
2290	2606	16743	16.6	1451	0.2	0.0104417
2291	2606.6	7630	5.4	472	0.3	0.0033966
2292	2607.1	7773	10.8	940	0.3	0.00676441
2293	2607.6	6955	5.3	463	0.4	0.00333183
2294	2608.1	11836	7.4	648	0.2	0.00466312
2295	2608.5	14439	1.9	166	0.2	0.00119457
2296	2609	12697	6.6	580	0.2	0.00417378
2297	2609.2	11471	5.3	461	0.2	0.00331744
2298	2609.6	14531	4.1	354	0.2	0.00254745
2299	2610	12250	7.9	691	0.2	0.00497256
2300	2610.6	10608	2.5	217	0.2	0.00156157
2301	2611.1	11802	14.5	1267	0.2	0.00911756
2302	2611.6	7378	2.7	232	0.4	0.00166951
2303	2612.1	15608	19.8	1730	0.2	0.0124494
2304	2612.6	10229	3.9	337	0.3	0.00242511
2305	2613.1	10572	15.4	1344	0.2	0.00967166
2306	2613.5	10388	4.4	387	0.3	0.00278492
2307	2614.1	8788	8.9	779	0.3	0.00560582
2308	2614.5	15080	1.4	121	0.2	0.000870738
2309	2615.1	9655	8.5	745	0.3	0.00536115
2310	2615.6	15972	2.9	253	0.2	0.00182063
2311	2616.1	10714	8.1	707	0.2	0.0050877
2312	2616.5	15850	2.5	218	0.2	0.00156877
2313	2617.1	10890	9.5	830	0.2	0.00597283
2314	2617.6	9946	2.4	211	0.3	0.00151839
2315	2618	16541	9.4	819	0.2	0.00589367
2316	2618.5	11864	1.5	135	0.2	0.000971484
2317	2619	14288	6.2	540	0.2	0.00388594
2318	2619.5	14284	3.4	294	0.2	0.00211568
2319	2620.1	19651	12.9	1123	0.1	0.00808131
2320	2620.6	13061	2.9	251	0.2	0.00180624
2321	2621.1	20784	19.4	1693	0.1	0.0121831
2322	2621.6	12577	6.1	529	0.2	0.00380678
2323	2622.1	22266	36.7	3201	0.1	0.023035
2324	2622.6	11465	4	349	0.2	0.00251147
2325	2623.1	22117	38.3	3339	0.1	0.024028
2326	2623.5	6921	4.4	382	0.4	0.00274894
2327	2624.1	18502	29.8	2600	0.1	0.0187101
2328	2624.5	13902	5	436	0.2	0.00313753
2329	2625.1	17163	24.6	2144	0.2	0.0154286
2330	2625.5	16907	3.8	330	0.2	0.00237474
2331	2626.1	13377	18.3	1597	0.2	0.0114923
2332	2626.6	13136	2.7	237	0.2	0.00170549
2333	2627.1	12384	13.7	1195	0.2	0.00859943
2334	2627.6	18546	3.2	278	0.1	0.00200054
2335	2628	17913	19	1662	0.1	0.01196
2336	2628.6	15954	2.6	230	0.2	0.00165512
2337	2629.2	17225	30.1	2627	0.2	0.0189044
2338	2629.6	15243	3.4	293	0.2	0.00210848
2339	2630.1	13882	20.3	1769	0.2	0.01273
2340	2630.6	11160	4	348	0.2	0.00250427
2341	2631.2	14564	30.5	2667	0.2	0.0191922
2342	2631.7	7278	2.1	187	0.4	0.00134569
2343	2632.1	12505	15.1	1322	0.2	0.00951335
2344	2633.2	8779	18.1	1577	0.3	0.0113484
2345	2633.6	7531	11.3	987	0.3	0.00710263
2346	2634	6747	9.7	843	0.4	0.00606638
2347	2634.5	11593	3.3	290	0.2	0.00208689
2348	2635.1	7491	7	609	0.4	0.00438247
2349	2635.7	9451	2.2	193	0.3	0.00138886
2350	2636	18410	26.2	2290	0.1	0.0164792
2351	2636.7	11926	7	607	0.2	0.00436808
2352	2637.1	18378	38.7	3382	0.1	0.0243375
2353	2637.5	7536	5.2	454	0.3	0.00326706
2354	2638	17506	34	2971	0.2	0.0213798
2355	2638.5	9827	2.6	227	0.3	0.00163353
2356	2638.7	11544	3.4	296	0.2	0.00213007
2357	2639	17088	29.7	2596	0.2	0.0186813
2358	2639.5	8385	3.7	322	0.3	0.00231717
2359	2640	16045	24.7	2159	0.2	0.0155365
2360	2640.4	10561	5.4	475	0.3	0.00341818
2361	2641.1	13587	15.9	1391	0.2	0.0100099
2362	2641.8	8244	6	520	0.3	0.00374201
2363	2642.2	21340	216.6	18907	0.1	0.136058
2364	2642.7	8685	7.1	622	0.3	0.00447602
2365	2643.2	22012	301.1	26285	0.1	0.189152
2366	2643.7	11488	11.5	1005	0.2	0.00723216
2367	2644.2	20962	246.2	21489	0.1	0.154639
2368	2644.7	8137	9.7	848	0.3	0.00610236
2369	2644.8	12569	10.5	920	0.2	0.00662048
2370	2645.2	17039	178.7	15603	0.2	0.112282
2371	2646.2	16347	97.9	8547	0.2	0.0615057
2372	2647.7	10793	226.8	19798	0.2	0.14247
2373	2648	10592	219.2	19132	0.3	0.137677
2374	2649.5	11775	62.5	5452	0.2	0.0392336
2375	2649.7	7480	64.6	5637	0.4	0.0405649
2376	2650	15143	57.3	5003	0.2	0.0360025
2377	2651	5801	35.4	3091	0.5	0.0222434
2378	2651.6	9925	19.4	1692	0.3	0.0121759
2379	2652	6726	29.3	2556	0.4	0.0183934
2380	2653	6195	24.8	2166	0.4	0.0155869
2381	2653.7	11227	9.3	813	0.2	0.00585049
2382	2654	10102	18	1569	0.3	0.0112908
2383	2654.6	8168	7.6	662	0.3	0.00476387
2384	2655	7621	14	1223	0.3	0.00880093
2385	2655.5	6435	7.4	650	0.4	0.00467752
2386	2656.2	15489	50.9	4446	0.2	0.0319942
2387	2656.6	7944	4.9	427	0.3	0.00307277
2388	2657	11182	12.6	1104	0.2	0.00794458
2389	2657.5	5810	7.2	624	0.5	0.00449041
2390	2658	11583	17.6	1538	0.2	0.0110677
2391	2658.5	11816	2.8	246	0.2	0.00177026
2392	2659.2	13034	28.3	2467	0.2	0.017753
2393	2659.7	8799	7.3	640	0.3	0.00460555
2394	2660	8802	14.9	1304	0.3	0.00938382
2395	2660.4	6739	6.5	564	0.4	0.00405864
2396	2661	12141	10.3	898	0.2	0.00646217
2397	2661.6	7674	2.6	223	0.3	0.00160475
2398	2662.2	10013	8.9	776	0.3	0.00558423
2399	2662.6	6656	4.6	402	0.4	0.00289286
2400	2663	10391	10	873	0.3	0.00628226
2401	2663.4	6878	5.2	456	0.4	0.00328146
2402	2663.7	6867	5.1	449	0.4	0.00323108
2403	2664.1	8288	10.7	934	0.3	0.00672123
2404	2664.6	11506	3.9	340	0.2	0.0024467
2405	2665.1	9030	10.6	922	0.3	0.00663488
2406	2665.5	7018	2	171	0.4	0.00123055
2407	2666.1	9810	6.9	604	0.3	0.00434649
2408	2666.6	9421	1.2	108	0.3	0.000777187
2409	2667.1	11113	7.1	616	0.2	0.00443285
2410	2667.5	7948	3	261	0.3	0.0018782
2411	2668	6994	4.2	364	0.4	0.00261941
2412	2668.6	12199	2.3	199	0.2	0.00143204
2413	2669.1	6593	4.8	421	0.4	0.00302959
2414	2669.7	5933	5.1	447	0.4	0.00321669
2415	2670.1	5900	7.8	679	0.5	0.0048862
2416	2670.7	7811	3.1	273	0.3	0.00196456
2417	2671.2	9857	4.1	360	0.3	0.00259062
2418	2671.5	7504	1.8	161	0.4	0.00115858
2419	2672.1	9035	4	348	0.3	0.00250427
2420	2672.6	7656	2.7	240	0.3	0.00172708
2421	2673	10290	7.7	676	0.3	0.00486462
2422	2673.6	8426	2.7	234	0.3	0.00168391
2423	2674	13036	7.7	675	0.2	0.00485742
2424	2675	12349	7.1	616	0.2	0.00443285
2425	2675.5	9030	1.8	155	0.3	0.00111541
2426	2676	16671	11.4	999	0.2	0.00718898
2427	2676.6	10337	3.4	300	0.3	0.00215885
2428	2677	12083	7.8	685	0.2	0.00492938
2429	2677.3	10293	4.3	373	0.3	0.00268417
2430	2677.7	9774	1.7	151	0.3	0.00108662
2431	2678.2	19350	45	3929	0.1	0.0282738
2432	2678.6	13123	1.6	139	0.2	0.00100027
2433	2679.2	20230	76.6	6683	0.1	0.0480921
2434	2679.7	9179	3.1	270	0.3	0.00194297
2435	2680.2	19129	60.5	5281	0.1	0.038003
2436	2680.7	7885	1.3	117	0.3	0.000841953
2437	2681.2	18804	38.4	3349	0.1	0.0241
2438	2681.6	8226	4.5	397	0.3	0.00285688
2439	2682.2	11762	18.5	1617	0.2	0.0116362
2440	2682.5	12783	3.4	293	0.2	0.00210848
2441	2683.2	20043	37.6	3282	0.1	0.0236179
2442	2683.6	13917	3	262	0.2	0.0018854
2443	2683.9	12709	3.2	283	0.2	0.00203652
2444	2684.2	21836	48.4	4224	0.1	0.0303967
2445	2684.6	10597	3.5	305	0.3	0.00219483
2446	2685.2	19771	38.4	3353	0.1	0.0241288
2447	2685.6	14608	3.8	329	0.2	0.00236754
2448	2686.2	18498	24.8	2163	0.1	0.0155653
2449	2686.6	10349	1.6	139	0.3	0.00100027
2450	2687.2	17247	16	1394	0.2	0.0100315
2451	2687.6	10016	2.9	250	0.3	0.00179904
2452	2688.2	9284	9	787	0.3	0.00566339
2453	2688.5	8993	3.6	318	0.3	0.00228838
2454	2689	12078	9.9	861	0.2	0.00619591
2455	2689.6	9322	1.9	169	0.3	0.00121615
2456	2690	16501	11.6	1017	0.2	0.00731851
2457	2690.5	8674	4.4	386	0.3	0.00277772
2458	2691	13404	7.8	679	0.2	0.0048862
2459	2691.4	8445	3.3	288	0.3	0.0020725
2460	2692.1	11147	11.1	973	0.2	0.00700188
2461	2692.5	11365	8.2	714	0.2	0.00513807
2462	2693.1	9223	15.8	1383	0.3	0.00995231
2463	2693.6	12779	6.6	574	0.2	0.00413061
2464	2694.2	15129	11.4	993	0.2	0.0071458
2465	2694.5	9117	1.7	146	0.3	0.00105064
2466	2695.2	13378	8.9	778	0.2	0.00559863
2467	2696.2	10636	6.5	571	0.3	0.00410902
2468	2696.5	9539	1.8	161	0.3	0.00115858
2469	2697	9562	5.5	482	0.3	0.00346856
2470	2697.6	10340	2.8	240	0.3	0.00172708
2471	2698	12399	6.1	531	0.2	0.00382117
2472	2698.4	11993	1.3	111	0.2	0.000798776
2473	2698.6	13272	2.3	202	0.2	0.00145363
2474	2699	14852	8.7	757	0.2	0.00544751
2475	2699.6	11217	3.2	279	0.2	0.00200773
2476	2700.1	9920	6.8	597	0.3	0.00429612
2477	2700.6	9778	2.4	207	0.3	0.00148961
2478	2701.1	11018	9.5	825	0.2	0.00593685
2479	2701.7	6610	2.5	223	0.4	0.00160475
2480	2702.1	8826	8.8	767	0.3	0.00551947
2481	2702.4	9018	4.2	366	0.3	0.0026338
2482	2702.7	9517	3.8	330	0.3	0.00237474
2483	2703.1	6438	8.3	728	0.4	0.00523882
2484	2703.6	7406	14.3	1252	0.4	0.00900961
2485	2703.9	6571	20.5	1786	0.4	0.0128524
2486	2704.5	7727	8.3	723	0.3	0.00520284
2487	2705	6601	11.6	1010	0.4	0.00726814
2488	2705.5	7179	5	441	0.4	0.00317351
2489	2706.2	10271	7.3	637	0.3	0.00458397
2490	2707	9978	5.2	455	0.3	0.00327426
2491	2707.2	12964	8.8	768	0.2	0.00552666
2492	2707.6	7262	2.4	210	0.4	0.0015112
2493	2708	11431	5.1	443	0.2	0.00318791
2494	2708.3	10828	9.3	814	0.3	0.00585769
2495	2708.6	11503	7.5	655	0.2	0.0047135
2496	2708.9	11331	9.3	810	0.2	0.0058289
2497	2709.3	9028	6.4	559	0.3	0.00402266
2498	2709.8	8393	2.8	241	0.3	0.00173428
2499	2710.2	15319	11	960	0.2	0.00690833
2500	2710.6	9857	1.1	97	0.3	0.000698029
2501	2711	12830	5	436	0.2	0.00313753
2502	2711.2	14039	10.7	931	0.2	0.00669964
2503	2711.6	7654	2	175	0.4	0.00125933
2504	2712.2	11287	9.8	859	0.2	0.00618152
2505	2713	12854	3.4	301	0.2	0.00216605
2506	2713.2	14474	9.5	825	0.2	0.00593685
2507	2713.9	16485	5.1	448	0.2	0.00322389
2508	2714.3	23109	44.9	3921	0.1	0.0282162
2509	2714.7	10887	2.9	253	0.2	0.00182063
2510	2714.9	10369	2.7	237	0.3	0.00170549
2511	2715.3	18553	89.9	7844	0.1	0.0564468
2512	2715.9	12000	4.2	366	0.2	0.0026338
2513	2716.3	19905	51.3	4481	0.1	0.0322461
2514	2716.9	11956	4.2	369	0.2	0.00265539
2515	2717.3	19190	33.7	2939	0.1	0.0211496
2516	2718	10250	4.5	397	0.3	0.00285688
2517	2718.3	19216	16.2	1412	0.1	0.010161
2518	2718.6	16913	3.1	272	0.2	0.00195736
2519	2719	12433	6.3	549	0.2	0.0039507
2520	2719.3	13797	8.5	742	0.2	0.00533956
2521	2719.6	13622	5.4	468	0.2	0.00336781
2522	2720	15649	9.2	799	0.2	0.00574975
2523	2720.3	10299	4.7	408	0.3	0.00293604
2524	2720.6	9578	4.1	361	0.3	0.00259782
2525	2721	12342	10.4	904	0.2	0.00650534
2526	2721.3	10517	7.3	634	0.3	0.00456238
2527	2721.6	10548	7.3	637	0.3	0.00458397
2528	2722	11174	11.7	1018	0.2	0.00732571
2529	2723	5137	20.9	1822	0.5	0.0131114
2530	2723.2	8229	21.9	1913	0.3	0.0137663
2531	2724	6765	11.8	1028	0.4	0.00739767
2532	2724.5	5904	8.9	776	0.5	0.00558423
2533	2724.9	7926	11.6	1011	0.3	0.00727534
2534	2725.3	8638	7.2	633	0.3	0.00455518
2535	2725.7	10672	5	441	0.3	0.00317351
2536	2726	10127	5.4	473	0.3	0.00340379
2537	2726.2	8595	6.2	539	0.3	0.00387874
2538	2726.6	6479	5.6	491	0.4	0.00353332
2539	2727	9477	7.3	633	0.3	0.00455518
2540	2727.2	10223	5	437	0.3	0.00314473
2541	2727.5	9098	4.8	423	0.3	0.00304398
2542	2727.9	9626	6.3	548	0.3	0.00394351
2543	2728.3	8152	7.6	667	0.3	0.00479985
2544	2728.9	8242	6	524	0.3	0.0037708
2545	2729.2	7738	5.3	462	0.4	0.00332463
2546	2730	11276	6.6	577	0.2	0.00415219
2547	2730.3	9082	5.9	516	0.3	0.00371323
2548	2730.6	9930	2.2	194	0.3	0.00139606
2549	2731	14076	10.5	919	0.2	0.00661329
2550	2731.3	7470	4.1	362	0.4	0.00260502
2551	2732	16332	12.3	1070	0.2	0.00769991
2552	2732.3	11551	3.7	326	0.2	0.00234595
2553	2733	11882	10.4	905	0.2	0.00651254
2554	2734	9899	6	526	0.3	0.00378519
2555	2735	10226	4.7	410	0.3	0.00295043
2556	2735.2	10960	4.2	368	0.2	0.00264819
2557	2736	8846	6	525	0.3	0.00377799
2558	2736.2	11776	6.4	555	0.2	0.00399388
2559	2736.7	15130	3.5	304	0.2	0.00218764
2560	2737	10850	6.1	529	0.3	0.00380678
2561	2737.2	11841	5.8	505	0.2	0.00363407
2562	2737.6	8109	2.7	233	0.3	0.00167671
2563	2737.9	10753	3.7	322	0.3	0.00231717
2564	2738.2	21545	30.2	2634	0.1	0.0189547
2565	2738.7	12897	6.4	563	0.2	0.00405145
2566	2738.9	13199	7.8	684	0.2	0.00492219
2567	2739.2	19921	38.8	3384	0.1	0.0243519
2568	2739.6	16594	3.9	338	0.2	0.00243231
2569	2739.9	18531	5.3	463	0.1	0.00333183
2570	2740.2	22997	27.8	2426	0.1	0.0174579
2571	2740.7	19498	1.7	150	0.1	0.00107943
2572	2741.2	19193	16.4	1435	0.1	0.0103265
2573	2741.6	10419	0.5	40	0.3	0.000287847
2574	2742.2	16708	9.1	795	0.2	0.00572096
2575	2742.6	18536	1.2	108	0.1	0.000777187
2576	2743	16782	6.9	601	0.2	0.0043249
2577	2743.3	16962	8	696	0.2	0.00500854
2578	2743.7	11993	3	265	0.2	0.00190699
2579	2744	11294	6	524	0.2	0.0037708
2580	2744.3	12171	7.6	667	0.2	0.00479985
2581	2744.6	12198	2.6	229	0.2	0.00164792
2582	2745	7642	5.4	475	0.4	0.00341818
2583	2745.3	7307	7.3	641	0.4	0.00461275
2584	2745.7	10983	2.6	226	0.3	0.00162634
2585	2746	8747	3.4	293	0.3	0.00210848
2586	2746.2	13154	6.7	587	0.2	0.00422416
2587	2746.6	7591	2.6	228	0.4	0.00164073
2588	2747	6463	2.7	239	0.4	0.00171989
2589	2747.3	11820	5.7	494	0.2	0.00355491
2590	2747.6	9294	1.7	145	0.3	0.00104345
2591	2748	13191	5.5	480	0.2	0.00345417
2592	2748.3	14876	8.7	757	0.2	0.00544751
2593	2748.9	9364	4.8	423	0.3	0.00304398
2594	2749.3	16801	10.2	892	0.2	0.00641899
2595	2749.9	12884	3.5	304	0.2	0.00218764
2596	2750.3	18567	9.6	841	0.1	0.00605199
2597	2750.7	12428	2.8	246	0.2	0.00177026
2598	2750.9	12432	6	523	0.2	0.0037636
2599	2751.3	13230	7.8	678	0.2	0.00487901
2600	2751.6	9172	4.3	372	0.3	0.00267698
2601	2751.9	11538	7.1	620	0.2	0.00446163
2602	2752.2	14467	7.2	629	0.2	0.0045264
2603	2752.6	9685	2.8	244	0.3	0.00175587
2604	2753.2	7822	5.4	474	0.4	0.00341099
2605	2753.9	14542	5.3	466	0.2	0.00335342
2606	2754.3	14876	6.8	595	0.2	0.00428173
2607	2754.7	9295	2.9	256	0.3	0.00184222
2608	2755	13589	6	520	0.2	0.00374201
2609	2755.3	15561	9.8	858	0.2	0.00617432
2610	2755.6	12317	5.2	455	0.2	0.00327426
2611	2756	10551	7.7	670	0.3	0.00482144
2612	2756.3	8876	10.3	897	0.3	0.00645497
2613	2757	3912	9.1	791	0.7	0.00569218
2614	2758.3	6130	106.3	9279	0.4	0.0667733
2615	2759.9	6900	15.9	1392	0.4	0.0100171
2616	2760.2	7963	23	2007	0.3	0.0144427
2617	2760.8	6496	19.4	1691	0.4	0.0121687
2618	2761.2	8361	34.9	3043	0.3	0.021898
2619	2762.3	5441	195.3	17050	0.5	0.122695
2620	2762.7	4542	190.7	16650	0.6	0.119816
2621	2763.9	10050	26.1	2277	0.3	0.0163857
2622	2764.4	5820	31.1	2718	0.5	0.0195592
2623	2764.9	5821	41.1	3588	0.5	0.0258199
2624	2765.3	6145	35.1	3060	0.4	0.0220203
2625	2765.9	7903	15.7	1373	0.3	0.00988035
2626	2766.2	6689	14.4	1261	0.4	0.00907438
2627	2767	4268	8.8	764	0.6	0.00549788
2628	2767.2	5730	11.1	968	0.5	0.0069659
2629	2767.9	6861	8.7	756	0.4	0.00544031
2630	2768.3	8011	11.3	988	0.3	0.00710982
2631	2768.8	4747	5.6	489	0.6	0.00351893
2632	2769.2	10005	9.9	866	0.3	0.00623189
2633	2770	7917	6	522	0.3	0.0037564
2634	2770.3	6972	9.1	793	0.4	0.00570657
2635	2770.6	6927	8	700	0.4	0.00503732
2636	2770.9	7273	8	700	0.4	0.00503732
2637	2771.3	15894	51.1	4459	0.2	0.0320878
2638	2771.9	9308	4.6	401	0.3	0.00288567
2639	2772.3	19455	54.4	4745	0.1	0.0341459
2640	2772.9	12182	4.2	363	0.2	0.00261221
2641	2773.3	20637	81.9	7151	0.1	0.0514599
2642	2773.9	10113	5.4	474	0.3	0.00341099
2643	2774.3	19518	33.8	2949	0.1	0.0212215
2644	2774.9	12344	5.7	499	0.2	0.00359089
2645	2775.3	20616	32.9	2870	0.1	0.020653
2646	2775.9	12780	6.5	568	0.2	0.00408743
2647	2776.3	8539	8.9	778	0.3	0.00559863
2648	2776.9	14976	6.7	584	0.2	0.00420257
2649	2777.3	17846	21.1	1841	0.2	0.0132482
2650	2777.9	7937	4.9	427	0.3	0.00307277
2651	2778.2	11704	9.6	835	0.2	0.00600881
2652	2778.9	8593	7.2	628	0.3	0.0045192
2653	2779.2	13249	14.6	1278	0.2	0.00919672
2654	2779.6	8559	4.4	385	0.3	0.00277053
2655	2779.9	9425	7.1	623	0.3	0.00448322
2656	2780.2	9465	7.3	634	0.3	0.00456238
2657	2780.9	9270	7	613	0.3	0.00441126
2658	2781.2	7296	8.7	759	0.4	0.0054619
2659	2781.6	8603	6.4	561	0.3	0.00403706
2660	2781.9	15032	8.3	723	0.2	0.00520284
2661	2782.3	16979	7.7	672	0.2	0.00483583
2662	2782.6	15590	0.8	67	0.2	0.000482144
2663	2782.9	16481	6.7	583	0.2	0.00419537
2664	2783.3	14794	11.9	1038	0.2	0.00746963
2665	2783.9	17781	15.5	1355	0.2	0.00975082
2666	2784.3	16245	11.3	987	0.2	0.00710263
2667	2784.9	17293	19.8	1733	0.2	0.012471
2668	2785.3	14238	10.9	948	0.2	0.00682198
2669	2785.9	15176	16.1	1406	0.2	0.0101178
2670	2786.3	12890	24.8	2163	0.2	0.0155653
2671	2786.9	8323	22.4	1957	0.3	0.0140829
2672	2787.3	13590	30.3	2642	0.2	0.0190123
2673	2787.9	7101	14.6	1277	0.4	0.00918952
2674	2788.3	11990	24.3	2119	0.2	0.0152487
2675	2788.6	7968	10.3	902	0.3	0.00649095
2676	2788.9	10085	10.8	947	0.3	0.00681478
2677	2789.3	15565	14	1223	0.2	0.00880093
2678	2789.9	9281	5.8	503	0.3	0.00361968
2679	2790.3	13995	13.8	1208	0.2	0.00869298
2680	2790.6	11162	3.6	312	0.3	0.00224521
2681	2790.9	9080	6.4	559	0.3	0.00402266
2682	2791.3	11288	9.5	829	0.2	0.00596563
2683	2791.6	10151	4.1	358	0.3	0.00257623
2684	2791.9	7131	5.8	506	0.4	0.00364127
2685	2792.2	7543	7.3	635	0.4	0.00456957
2686	2792.9	11924	5.3	464	0.2	0.00333903
2687	2793.3	13533	7.7	668	0.2	0.00480705
2688	2793.9	14089	6	521	0.2	0.00374921
2689	2794.3	15724	6	522	0.2	0.0037564
2690	2794.6	14235	2.5	220	0.2	0.00158316
2691	2794.9	12860	5.9	511	0.2	0.00367725
2692	2795.3	14085	6.3	548	0.2	0.00394351
2693	2795.6	11182	2.1	181	0.3	0.00130251
2694	2795.9	13449	8.6	753	0.2	0.00541872
2695	2796.3	11948	9.2	801	0.2	0.00576414
2696	2796.5	13174	5.2	450	0.2	0.00323828
2697	2796.9	14420	8.5	744	0.2	0.00535396
2698	2797.3	13263	10.6	921	0.2	0.00662768
2699	2797.9	10759	8.8	770	0.3	0.00554106
2700	2798.3	8233	9	788	0.3	0.00567059
2701	2798.9	14084	10.7	931	0.2	0.00669964
2702	2799.3	13496	10.1	882	0.2	0.00634703
2703	2799.6	7311	5.5	477	0.4	0.00343258
2704	2799.9	15029	11.2	979	0.2	0.00704506
2705	2800.3	13429	14.4	1255	0.2	0.0090312
2706	2800.9	12116	9.8	854	0.2	0.00614554
2707	2801.3	9421	10.1	878	0.3	0.00631824
2708	2801.9	11851	9.6	834	0.2	0.00600161
2709	2802.3	9981	13	1135	0.3	0.00816766
2710	2803	8932	33.3	2908	0.3	0.0209265
2711	2803.3	7762	35.5	3097	0.4	0.0222866
2712	2803.9	9827	14.5	1267	0.3	0.00911756
2713	2804.3	12224	13.2	1154	0.2	0.00830439
2714	2804.9	7238	9.7	844	0.4	0.00607357
2715	2805.3	11917	10.5	913	0.2	0.00657011
2716	2805.9	9142	5.7	497	0.3	0.0035765
2717	2806.3	10096	7.1	617	0.3	0.00444004
2718	2806.9	9621	6.3	547	0.3	0.00393631
2719	2807.3	6605	5.3	463	0.4	0.00333183
2720	2807.9	9306	5.7	494	0.3	0.00355491
2721	2808.3	11369	7.2	627	0.2	0.004512
2722	2808.8	8790	6.6	580	0.3	0.00417378
2723	2809.3	11133	7.2	624	0.3	0.00449041
2724	2809.9	13671	7.3	637	0.2	0.00458397
2725	2810.3	20845	28.3	2472	0.1	0.017789
2726	2810.9	17722	8.1	704	0.2	0.00506611
2727	2811.3	24467	41.2	3599	0.1	0.025899
2728	2811.9	12492	9.4	818	0.2	0.00588647
2729	2812.3	21871	37.9	3306	0.1	0.0237906
2730	2812.9	14359	9.1	790	0.2	0.00568498
2731	2813.3	21465	36.6	3193	0.1	0.0229774
2732	2813.9	11256	7.9	685	0.2	0.00492938
2733	2814.3	17881	16.3	1426	0.2	0.0102617
2734	2814.7	18411	7.8	684	0.2	0.00492219
2735	2814.9	14508	6.3	553	0.2	0.00397949
2736	2815.3	16173	11.8	1030	0.2	0.00741206
2737	2816	16707	11.7	1022	0.2	0.00735449
2738	2816.3	17328	11.1	966	0.2	0.00695151
2739	2816.9	12587	3.9	339	0.2	0.0024395
2740	2817.3	18962	15.6	1362	0.1	0.00980119
2741	2817.9	14229	2.6	225	0.2	0.00161914
2742	2818.3	14568	9.2	800	0.2	0.00575694
2743	2819	8320	4.3	377	0.3	0.00271296
2744	2819.3	9815	8.4	729	0.3	0.00524601
2745	2819.9	6407	4.3	379	0.4	0.00272735
2746	2820.3	12039	8	699	0.2	0.00503013
2747	2820.9	9082	4.2	369	0.3	0.00265539
2748	2821.3	12756	7.4	648	0.2	0.00466312
2749	2821.8	8786	3.7	322	0.3	0.00231717
2750	2822.3	10397	8.8	768	0.3	0.00552666
2751	2822.9	6351	4.1	360	0.4	0.00259062
2752	2823.9	6712	36	3140	0.4	0.022596
2753	2824.9	8071	9.6	841	0.3	0.00605199
2754	2825.3	4817	10.8	940	0.6	0.00676441
2755	2825.8	8074	7.6	664	0.3	0.00477826
2756	2826.3	7403	13.3	1160	0.4	0.00834757
2757	2826.8	6679	4.4	380	0.4	0.00273455
2758	2827.3	12113	11.5	1000	0.2	0.00719618
2759	2827.9	9099	3.9	338	0.3	0.00243231
2760	2828.3	14180	14.8	1292	0.2	0.00929746
2761	2828.8	7370	6.1	531	0.4	0.00382117
2762	2829.3	12639	14.9	1302	0.2	0.00936942
2763	2829.9	7668	4.3	379	0.4	0.00272735
2764	2830.3	17199	20.6	1796	0.2	0.0129243
2765	2830.8	8622	2.4	212	0.3	0.00152559
2766	2831.3	17273	23.2	2029	0.2	0.014601
2767	2831.9	8023	3.8	334	0.4	0.00240352
2768	2832.3	15757	19.3	1686	0.2	0.0121328
2769	2832.9	10072	4	349	0.3	0.00251147
2770	2833.3	16875	17.2	1497	0.2	0.0107727
2771	2834	8997	3.6	314	0.3	0.0022596
2772	2834.3	13038	10.1	883	0.2	0.00635422
2773	2835.3	6690	8.3	720	0.4	0.00518125
2774	2836.4	6025	19.1	1668	0.5	0.0120032
2775	2836.6	12607	15	1312	0.2	0.00944139
2776	2837.9	11609	6.7	585	0.2	0.00420976
2777	2838.2	10559	5	439	0.3	0.00315912
2778	2839.3	13715	9	782	0.2	0.00562741
2779	2840	8015	3.9	345	0.4	0.00248268
2780	2840.3	10905	11.5	1003	0.3	0.00721777
2781	2840.9	7361	3.4	296	0.4	0.00213007
2782	2841.3	11586	13.9	1214	0.2	0.00873616
2783	2842.3	12500	21.8	1905	0.2	0.0137087
2784	2842.9	7411	7.7	670	0.4	0.00482144
2785	2843.3	15151	14.7	1287	0.2	0.00926148
2786	2844	6647	8.7	759	0.4	0.0054619
2787	2844.3	10916	19	1656	0.3	0.0119169
2788	2844.9	7330	17.2	1503	0.4	0.0108159
2789	2845.3	11771	21.3	1856	0.2	0.0133561
2790	2845.7	8189	8	697	0.3	0.00501574
2791	2845.9	6906	7.2	632	0.4	0.00454798
2792	2846.4	13142	15.2	1331	0.2	0.00957811
2793	2847.4	6295	47	4102	0.5	0.0295187
2794	2847.6	10355	47.8	4170	0.3	0.0300081
2795	2848.2	9518	23.4	2043	0.3	0.0147018
2796	2848.9	6957	4.6	397	0.4	0.00285688
2797	2849.3	8159	10.7	932	0.3	0.00670684
2798	2849.9	5867	9	784	0.5	0.0056418
2799	2850.3	4709	12.1	1057	0.6	0.00760636
2800	2850.9	7127	13.7	1195	0.4	0.00859943
2801	2851.3	10125	12.7	1111	0.3	0.00799495
2802	2851.9	11480	7.1	620	0.2	0.00446163
2803	2852.3	10842	7.8	678	0.3	0.00487901
2804	2853	6777	9.9	867	0.4	0.00623909
2805	2853.3	8234	9.1	796	0.3	0.00572816
2806	2853.9	12962	6.1	536	0.2	0.00385715
2807	2854.3	12777	7.6	660	0.2	0.00474948
2808	2855	6388	5.7	501	0.4	0.00360529
2809	2855.9	6588	6.9	605	0.4	0.00435369
2810	2856.9	6843	5	435	0.4	0.00313034
2811	2857.3	13638	8.6	754	0.2	0.00542592
2812	2858	8478	3.4	296	0.3	0.00213007
2813	2858.4	14751	11.8	1030	0.2	0.00741206
2814	2858.8	8265	3.2	278	0.3	0.00200054
2815	2859.3	17488	14	1220	0.2	0.00877934
2816	2859.9	9662	4.8	422	0.3	0.00303679
2817	2860.3	8871	12.8	1120	0.3	0.00805972
2818	2860.9	6153	3.6	313	0.5	0.0022524
2819	2861.3	13652	9	784	0.2	0.0056418
2820	2861.9	8621	3.8	332	0.3	0.00238913
2821	2862.3	13481	8.2	716	0.2	0.00515246
2822	2862.9	9512	4.1	356	0.3	0.00256184
2823	2863.3	14630	10.9	947	0.2	0.00681478
2824	2863.9	9981	7.6	668	0.3	0.00480705
2825	2864.3	12367	11	956	0.2	0.00687955
2826	2864.9	14236	11.5	1005	0.2	0.00723216
2827	2865.3	12402	5.5	481	0.2	0.00346136
2828	2865.9	18192	10.8	947	0.2	0.00681478
2829	2866.3	14744	7.4	644	0.2	0.00463434
2830	2866.8	12103	4.7	414	0.2	0.00297922
2831	2867.3	11251	5.4	475	0.3	0.00341818
2832	2868.3	7595	5.6	487	0.4	0.00350454
2833	2868.8	9239	1.8	156	0.3	0.0011226
2834	2869.3	13773	6.1	533	0.2	0.00383556
2835	2869.6	9464	1	87	0.3	0.000626067
2836	2870.3	14426	6.9	605	0.2	0.00435369
2837	2870.8	9041	5.8	507	0.3	0.00364846
2838	2871.3	14779	10.9	953	0.2	0.00685796
2839	2871.8	6744	5.5	479	0.4	0.00344697
2840	2872.4	8208	8.5	740	0.3	0.00532517
2841	2872.9	6230	10.6	925	0.5	0.00665646
2842	2873.3	11182	6.2	538	0.3	0.00387154
2843	2873.9	6422	4.9	432	0.4	0.00310875
2844	2874.3	7776	4	348	0.4	0.00250427
2845	2874.8	7213	5.1	448	0.4	0.00322389
2846	2875.3	8069	7.4	646	0.4	0.00464873
2847	2875.9	9822	7.7	671	0.3	0.00482864
2848	2876.3	7962	8.4	735	0.4	0.00528919
2849	2877.1	8132	5.3	460	0.4	0.00331024
2850	2877.4	5394	7	612	0.5	0.00440406
2851	2878.2	6396	8.6	754	0.4	0.00542592
2852	2878.6	9576	9.4	822	0.3	0.00591526
2853	2879.3	11837	12.8	1113	0.2	0.00800935
2854	2879.7	8028	7.8	679	0.4	0.0048862
2855	2880.4	6948	6.6	572	0.4	0.00411621
2856	2880.9	7935	8.4	730	0.4	0.00525321
2857	2881.9	4832	9.1	797	0.6	0.00573535
2858	2882.4	6405	7	614	0.4	0.00441845
2859	2882.9	6652	11.6	1013	0.4	0.00728973
2860	2883.3	7101	10.6	922	0.4	0.00663488
2861	2883.9	4985	15.6	1365	0.6	0.00982278
2862	2884.3	5870	13.4	1169	0.5	0.00841233
2863	2884.9	5961	13.7	1200	0.5	0.00863541
2864	2885.3	10822	27.1	2363	0.3	0.0170046
2865	2886.4	6814	24.1	2100	0.4	0.015112
2866	2886.6	10497	22.7	1985	0.3	0.0142844
2867	2888.1	8252	527.7	46060	0.3	0.331456
2868	2889.8	4675	47.4	4138	0.6	0.0297778
2869	2890.1	8258	36.8	3210	0.3	0.0230997
2870	2890.9	4447	40	3495	0.6	0.0251506
2871	2891.2	9128	33.4	2913	0.3	0.0209625
2872	2891.8	5043	22.1	1925	0.6	0.0138526
2873	2892.4	5445	20.6	1800	0.5	0.0129531
2874	2892.9	5409	15.2	1328	0.5	0.00955652
2875	2893.4	5252	18.8	1642	0.6	0.0118161
2876	2893.8	6092	12.6	1098	0.5	0.0079014
2877	2894.3	6483	15.3	1339	0.4	0.00963568
2878	2894.9	7237	7.9	688	0.4	0.00495097
2879	2895.3	5392	10.1	883	0.5	0.00635422
2880	2895.9	6856	7.7	669	0.4	0.00481424
2881	2896.3	10247	10.7	932	0.3	0.00670684
2882	2896.8	4828	5	436	0.6	0.00313753
2883	2897.3	8884	8.1	704	0.3	0.00506611
2884	2897.8	8058	5.9	518	0.4	0.00372762
2885	2898.3	7475	8.5	740	0.4	0.00532517
2886	2898.8	6738	3	263	0.4	0.00189259
2887	2899.4	10691	7.9	687	0.3	0.00494377
2888	2899.9	9048	3.9	339	0.3	0.0024395
2889	2900.4	7301	8	696	0.4	0.00500854
2890	2900.9	6835	4.6	404	0.4	0.00290726
2891	2901.4	11028	8.8	771	0.3	0.00554825
2892	2902	9950	5.8	505	0.3	0.00363407
2893	2902.3	13662	13.1	1145	0.2	0.00823962
2894	2902.9	8561	7	611	0.3	0.00439686
2895	2903.4	10966	8.8	770	0.3	0.00554106
2896	2903.9	7872	6.1	530	0.4	0.00381397
2897	2904.4	12747	16.4	1432	0.2	0.0103049
2898	2904.9	6455	4.1	355	0.4	0.00255464
2899	2905.3	13930	15.3	1338	0.2	0.00962849
2900	2905.9	8375	4.9	427	0.3	0.00307277
2901	2906.3	14651	8.8	768	0.2	0.00552666
2902	2906.9	10736	4.9	431	0.3	0.00310155
2903	2907.4	14548	8.2	712	0.2	0.00512368
2904	2907.9	9998	2.4	205	0.3	0.00147522
2905	2908.3	12376	6.3	548	0.2	0.00394351
2906	2908.9	13134	4	347	0.2	0.00249707
2907	2909.3	9478	6.4	559	0.3	0.00402266
2908	2909.9	6967	7.4	648	0.4	0.00466312
2909	2910.3	6921	7.8	685	0.4	0.00492938
2910	2910.8	8135	4	351	0.4	0.00252586
2911	2911.3	10985	7.9	688	0.3	0.00495097
2912	2911.9	6705	4.7	408	0.4	0.00293604
2913	2912.3	9230	9.3	816	0.3	0.00587208
2914	2912.8	8322	6.7	581	0.3	0.00418098
2915	2913.1	10593	7.3	637	0.3	0.00458397
2916	2913.3	7639	8.9	775	0.4	0.00557704
2917	2913.9	9777	4.3	376	0.3	0.00270576
2918	2914.3	17050	8.6	754	0.2	0.00542592
2919	2914.9	6302	4	347	0.5	0.00249707
2920	2915.4	13164	6.9	598	0.2	0.00430331
2921	2915.9	12984	2.6	228	0.2	0.00164073
2922	2916.3	15477	7	610	0.2	0.00438967
2923	2916.9	10847	2.7	237	0.3	0.00170549
2924	2917.3	16756	6.7	587	0.2	0.00422416
2925	2917.8	15286	2.5	219	0.2	0.00157596
2926	2918.4	18305	3.6	311	0.2	0.00223801
2927	2919.3	17226	2.9	249	0.2	0.00179185
2928	2919.7	8625	0.3	23	0.3	0.000165512
2929	2920.3	14443	0.3	25	0.2	0.000179904
2930	2921.4	6371	2.4	209	0.5	0.001504
2931	2921.9	5386	2.6	228	0.5	0.00164073
2932	2922.3	13035	5.8	509	0.2	0.00366285
2933	2922.9	8706	4.4	386	0.3	0.00277772
2934	2923.3	9691	6.5	566	0.3	0.00407304
2935	2923.8	6566	4	353	0.4	0.00254025
2936	2924.3	12835	6.3	550	0.2	0.0039579
2937	2924.9	6141	4.5	389	0.5	0.00279931
2938	2925.4	5522	4.7	408	0.5	0.00293604
2939	2925.9	6731	4.4	382	0.4	0.00274894
2940	2926.3	11243	8.5	740	0.3	0.00532517
2941	2926.9	8459	3.2	283	0.3	0.00203652
2942	2927.3	14507	6.5	565	0.2	0.00406584
2943	2927.9	9784	2.5	215	0.3	0.00154718
2944	2928.3	17088	13.7	1193	0.2	0.00858504
2945	2928.9	10924	2.2	188	0.3	0.00135288
2946	2929.4	20428	16.5	1438	0.1	0.0103481
2947	2930	9203	2.4	213	0.3	0.00153279
2948	2930.4	18947	13.4	1173	0.2	0.00844112
2949	2930.8	15850	3.8	334	0.2	0.00240352
2950	2931.4	16511	6.7	587	0.2	0.00422416
2951	2932	6747	3.9	343	0.4	0.00246829
2952	2932.4	10797	9.3	811	0.3	0.0058361
2953	2932.9	5197	6	525	0.6	0.00377799
2954	2933.4	10190	8.7	761	0.3	0.00547629
2955	2933.9	9735	5.6	491	0.3	0.00353332
2956	2934.4	14145	3.9	345	0.2	0.00248268
2957	2934.7	9189	2.3	200	0.3	0.00143924
2958	2935.3	12282	1.5	135	0.2	0.000971484
2959	2936	7880	2.4	213	0.4	0.00153279
2960	2936.3	13360	4.9	429	0.2	0.00308716
2961	2936.8	8412	2.8	247	0.3	0.00177746
2962	2937.3	8083	2.9	253	0.4	0.00182063
2963	2937.9	6171	3	264	0.5	0.00189979
2964	2938.4	11661	3.9	339	0.3	0.0024395
2965	2938.8	8787	3.2	284	0.3	0.00204371
2966	2939.3	6932	5.9	515	0.4	0.00370603
2967	2939.8	3920	4.8	420	0.8	0.00302239
2968	2940.4	6425	7.5	659	0.5	0.00474228
2969	2941.4	6133	26.2	2286	0.5	0.0164505
2970	2941.7	3917	24.4	2128	0.8	0.0153135
2971	2943	7362	5.1	444	0.4	0.0031951
2972	2943.4	7857	9.7	847	0.4	0.00609516
2973	2943.8	7616	4.6	401	0.4	0.00288567
2974	2944.3	13941	6.3	546	0.2	0.00392911
2975	2944.8	10992	3.3	292	0.3	0.00210128
2976	2945.3	14430	7.4	644	0.2	0.00463434
2977	2945.9	6465	2.1	183	0.5	0.0013169
2978	2946.3	14857	5.8	503	0.2	0.00361968
2979	2946.8	11682	2.7	232	0.3	0.00166951
2980	2947.3	13719	6.9	599	0.2	0.00431051
2981	2947.8	8766	3.7	324	0.3	0.00233156
2982	2948.3	12016	5.8	507	0.2	0.00364846
2983	2948.9	9595	3.1	272	0.3	0.00195736
2984	2949.3	15311	5.8	506	0.2	0.00364127
2985	2949.7	8580	2	178	0.3	0.00128092
2986	2950.1	9716	3	263	0.3	0.00189259
2987	2950.3	12646	5.1	448	0.2	0.00322389
2988	2950.8	8775	3.5	307	0.3	0.00220923
2989	2951.4	11148	6.3	548	0.3	0.00394351
2990	2951.9	9687	3.5	309	0.3	0.00222362
2991	2952.3	13293	5.3	461	0.2	0.00331744
2992	2952.8	9636	3.4	297	0.3	0.00213726
2993	2953.1	11812	2.3	202	0.3	0.00145363
2994	2953.4	16551	8.9	776	0.2	0.00558423
2995	2953.9	7729	4	349	0.4	0.00251147
2996	2954.4	11994	6.3	550	0.2	0.0039579
2997	2955.3	7188	26.7	2334	0.4	0.0167959
2998	2956	5178	10.8	941	0.6	0.0067716
2999	2956.4	8668	11.5	1006	0.3	0.00723935
3000	2956.8	6772	7.6	664	0.4	0.00477826
3001	2957.2	7033	9.4	820	0.4	0.00590087
3002	2957.9	8776	0.8	68	0.3	0.00048934
3003	2958.3	17425	7.5	651	0.2	0.00468471
3004	2958.7	20475	8	700	0.1	0.00503732
3005	2959.1	14201	2.3	199	0.2	0.00143204
3006	2959.4	17165	14.5	1269	0.2	0.00913195
3007	2959.8	9866	1.1	97	0.3	0.000698029
3008	2960.3	11757	6	522	0.3	0.0037564
3009	2960.9	11888	3.8	330	0.2	0.00237474
3010	2961.4	14466	6.2	543	0.2	0.00390752
3011	2961.8	8696	3.8	333	0.3	0.00239633
3012	2962.1	9874	3.4	300	0.3	0.00215885
3013	2962.4	8742	6.6	574	0.3	0.00413061
3014	2962.8	6102	6.4	555	0.5	0.00399388
3015	2963.3	6972	5.9	511	0.4	0.00367725
3016	2963.8	7020	3.5	307	0.4	0.00220923
3017	2964.4	5970	5.3	459	0.5	0.00330305
3018	2965.2	6243	8.5	742	0.5	0.00533956
3019	2965.8	9538	6.4	563	0.3	0.00405145
3020	2966.3	10395	4.8	422	0.3	0.00303679
3021	2966.7	11022	3.7	322	0.3	0.00231717
3022	2967.4	12210	6.3	547	0.2	0.00393631
3023	2967.6	10791	3.4	293	0.3	0.00210848
3024	2968	12875	6.8	590	0.2	0.00424574
3025	2968.4	13438	7.3	638	0.2	0.00459116
3026	2968.8	7331	5.5	481	0.4	0.00346136
3027	2969.3	13057	7.2	629	0.2	0.0045264
3028	2969.8	10498	5.3	461	0.3	0.00331744
3029	2970.3	9878	6.1	535	0.3	0.00384996
3030	2970.8	11480	4.1	355	0.3	0.00255464
3031	2971.4	6307	6.2	542	0.5	0.00390033
3032	2971.9	6794	6.1	530	0.4	0.00381397
3033	2972.3	8537	8.1	703	0.3	0.00505891
3034	2972.7	7313	6.8	596	0.4	0.00428892
3035	2973.3	6374	5.9	511	0.5	0.00367725
3036	2974	8495	5.4	472	0.4	0.0033966
3037	2974.4	14468	8.8	772	0.2	0.00555545
3038	2974.8	9797	6.4	560	0.3	0.00402986
3039	2975.3	7314	6.6	574	0.4	0.00413061
3040	2975.7	7858	5	436	0.4	0.00313753
3041	2976	7799	4.9	425	0.4	0.00305838
3042	2976.4	10073	7.2	628	0.3	0.0045192
3043	2976.8	9883	7	614	0.3	0.00441845
3044	2977.5	7602	9.6	834	0.4	0.00600161
3045	2978.1	11913	7.3	639	0.3	0.00459836
3046	2978.8	7371	5.4	474	0.4	0.00341099
3047	2979.9	10216	9.7	843	0.3	0.00606638
3048	2980.2	7266	9.6	834	0.4	0.00600161
3049	2980.8	5374	5.2	450	0.6	0.00323828
3050	2981.3	7130	5.3	459	0.4	0.00330305
3051	2981.8	12165	5	438	0.2	0.00315193
3052	2982.3	6911	4.4	382	0.4	0.00274894
3053	2982.6	7239	3.4	301	0.4	0.00216605
3054	2983	6709	2.9	250	0.4	0.00179904
3055	2983.4	13942	6.2	539	0.2	0.00387874
3056	2983.9	8536	3.2	279	0.3	0.00200773
3057	2984.4	10051	3.5	307	0.3	0.00220923
3058	2984.8	10283	3.8	333	0.3	0.00239633
3059	2985.3	18444	8.1	711	0.2	0.00511648
3060	2985.8	10883	2	179	0.3	0.00128812
3061	2986.3	18461	8.7	761	0.2	0.00547629
3062	2986.8	12993	3.4	300	0.2	0.00215885
3063	2987.3	13679	7.4	645	0.2	0.00464153
3064	2987.8	14106	3.7	319	0.2	0.00229558
3065	2988.3	11937	6	523	0.3	0.0037636
3066	2988.9	11865	2.8	249	0.3	0.00179185
3067	2989.3	15136	5.3	463	0.2	0.00333183
3068	2990	7035	3.4	301	0.4	0.00216605
3069	2990.3	14611	6.5	567	0.2	0.00408023
3070	2990.8	12366	2.3	203	0.2	0.00146082
3071	2991.1	10980	2.9	251	0.3	0.00180624
3072	2991.3	13965	4.8	423	0.2	0.00304398
3073	2991.8	8376	1.7	146	0.4	0.00105064
3074	2992.3	14921	5.3	461	0.2	0.00331744
3075	2992.8	8730	1.5	127	0.3	0.000913915
3076	2993.3	10727	3.5	304	0.3	0.00218764
3077	2994.3	12184	4.1	354	0.2	0.00254745
3078	2994.6	10890	2	175	0.3	0.00125933
3079	2994.9	13390	5.3	463	0.2	0.00333183
3080	2995.3	11685	4.2	369	0.3	0.00265539
3081	2995.7	7590	3.2	275	0.4	0.00197895
3082	2996.2	8356	4.3	373	0.4	0.00268417
3083	2996.8	13319	4.4	385	0.2	0.00277053
3084	2997.3	11423	7.2	631	0.3	0.00454079
3085	2997.8	9751	4.9	425	0.3	0.00305838
3086	2998.3	13939	3.2	282	0.2	0.00202932
3087	2998.7	16408	4	345	0.2	0.00248268
3088	2999	16729	3.1	270	0.2	0.00194297
3089	2999.4	17979	4.1	355	0.2	0.00255464
3090	2999.8	14409	1	90	0.2	0.000647656
