# Supplementary material for: Enzymatic protein fusions with 100% product yield
Source: eLife. 2025 Apr 1;13:RP102765. doi: 10.7554/eLife.102765 (PMC11961121; doi:10.7554/eLife.102765)
Supplement: Supplementary file 1. [file elife-102765-supp1.xlsx]

## Sheet: Tabelle1
Protein / Peptide	Construct	Note	Figures	Sequence	Vector	Purification strategy
Connectase	Connectase-GS-His6		2-6, S1-S8	MTLVIAFIGKNGAVMAGDMREITFEGEKPDREKLEKELYSGSIVTDEEMQKKAEEFGVKITVADCKEKVSERNGVLVGEVSSAEGGVVKKRRLYASAGNFAIAELINTEMTLTSQGKGSNFIAFGNEFTKQVANKCFKDNWTKKSNLQDAVKILILCMETVARKTASVSKQFMIVQTASNADVLKVVEKDRNCGSHHHHHH	pET30b	Ni2+ column
BcPAP	BcPAP-GS-His6		2-6, S1-S3, S6, S7	MYTEGFIDVTGGRVSFQKFDENGGGTPVIVLHGGPGSSCYSLLGLKALAKDRPVILYDQLGCGKSDRPMDTTLWRLDRFVEELAQIRQALNLDEVHILGHSWGTTLAAAYCLTKPSGVKSVIFSSPCLSAPLWEQDQKRNLKKLPLDVQETINRCEENGTTDSEEFAAAIEVFGKHFVNRLEKQPEWLEQKPSGYRNADIYNIMWGPSEFTVLGNLKNFDCTTQLKEITCPSLYTCGRFDEATPETTEYYSSLTPKSKFHVFEKSAHMPYIEEPEEYLAVIGDFLNSIGSHHHHHH	pET30b	Ni2+ column
Ub-Strep	His6-GS-Ubiquitin-RELASKD-CnTag-SEEGEGS-Strep	ELASKD-CnTag is necessary for N-terminal substrate in Connectase-mediated ligations; the C-terminal substrate only requires the CnTag sequence; the SEEGEGS linker before the Strep-tag is probably not necessary	2, 3, S1, S3, S4, S8	MHHHHHHGSMKIKIVPAVGGGSPLELEVAPNATVGAVRTKVCAMKKLPPDTTRLTYKGRALKDTETLESLGVADGDKFVLITRTVGGRELASKDPGAFDADPLVVEISEEGEGSWSHPQFEK	pET30b	Ni2+ column
AGAFDADPLVVEI	-		2, 3, 4, S1, S4	AGAFDADPLVVEI	-	-
CGAFDADPLVVEI	-		2	CGAFDADPLVVEI	-	-
DGAFDADPLVVEI	-		2	DGAFDADPLVVEI	-	-
EGAFDADPLVVEI	-		2	EGAFDADPLVVEI	-	-
FGAFDADPLVVEI	-		2	FGAFDADPLVVEI	-	-
GGAFDADPLVVEI	-		2	GGAFDADPLVVEI	-	-
HGAFDADPLVVEI	-		2	HGAFDADPLVVEI	-	-
IGAFDADPLVVEI	-		2	IGAFDADPLVVEI	-	-
KGAFDADPLVVEI	-		2	KGAFDADPLVVEI	-	-
LGAFDADPLVVEI	-		2	LGAFDADPLVVEI	-	-
MGAFDADPLVVEI	-		2	MGAFDADPLVVEI	-	-
NGAFDADPLVVEI	-		2	NGAFDADPLVVEI	-	-
PGAFDADPLVVEI	-		2	PGAFDADPLVVEI	-	-
QGAFDADPLVVEI	-		2	QGAFDADPLVVEI	-	-
RGAFDADPLVVEI	-		2	RGAFDADPLVVEI	-	-
SGAFDADPLVVEI	-		2	SGAFDADPLVVEI	-	-
TGAFDADPLVVEI	-		2	TGAFDADPLVVEI	-	-
VGAFDADPLVVEI	-		2	VGAFDADPLVVEI	-	-
WGAFDADPLVVEI	-		2	WGAFDADPLVVEI	-	-
YGAFDADPLVVEI	-		2	YGAFDADPLVVEI	-	-
LysS	His6-GS-LysS-RELASKD-CnTag		3, S1, S2	MHHHHHHGSMSEQHAQGADAVVDLNNELKTRREKLANLREQGIAFPNDFRRDHTSDQLHAEFDGKENEELEALNIEVAVAGRMMTRRIMGKASFVTLQDVGGRIQLYVARDDLPEGVYNEQFKKWDLGDILGAKGKLFKTKTGELSIHCTELRLLTKALRPLPDKFHGLQDQEARYRQRYLDLISNDESRNTFKVRSQILSGIRQFMVNRGFMEVETPMMQVIPGGAAARPFITHHNALDLDMYLRIAPELYLKRLVVGGFERVFEINRNFRNEGISVRHNPEFTMMELYMAYADYKDLIELTESLFRTLAQDILGKTEVTYGDVTLDFGKPFEKLTMREAIKKYRPETDMADLDNFDSAKAIAESIGIHVEKSWGLGRIVTEIFEEVAEAHLIQPTFI…	pET30b	Ni2+ column
GST	His6-GS-GST-RELASKD-CnTag		3, S1	MHHHHHHGSMSPILGYWKIKGLVQPTRLLLEYLEEKYEEHLYERDEGDKWRNKKFELGLEFPNLPYYIDGDVKLTQSMAIIRYIADKHNMLGGCPKERAEISMLEGAVLDIRYGVSRIAYSKDFETLKVDFLSKLPEMLKMFEDRLCHKTYLNGDHVTHPDFMLYDALDVVLYMDPMCLDAFPKLVCFKKRIEAIPQIDKYLKSSKYIAWPLQGWQATFGGGDHPPKSDGSSGSSRELASKDPGAFDADPLVVEI	pET30b	Ni2+ column
MBP	His6-TEV-CnTag(P1A)-AAAGA-MBP	The TEV tag was removed for all experiments, except for Figure 3F; AAAGA is a linker sequence	3, 6, S1, S3	MHHHHHHENLYFQAGAFDADPLVVEIAAAGAKIEEGKLVIWINGDKGYNGLAEVGKKFEKDTGIKVTVEHPDKLEEKFPQVAATGDGPDIIFWAHDRFGGYAQSGLLAEITPDKAFQDKLYPFTWDAVRYNGKLIAYPIAVEALSLIYNKDLLPNPPKTWEEIPALDKELKAKGKSALMFNLQEPYFTWPLIAADGGYAFKYENGKYDIKDVGVDNAGAKAGLTFLVDLIKNKHMNADTDYSIAEAAFNKGETAMTINGPWAWSNIDTSKVNYGVTVLPTFKGQPSKPFVGVLSAGINAASPNKELAKEFLENYLLTDEGLEAVNKDKPLGAVALKSYEEELAKDPRIAATMENAQKGEIMPNIPQMSAFWYAVRTAVINAASGRQTVDEALKDAQTRI…	pET30b	Ni2+ column -> Dialysis / TEV cleavage -> Ni2+ column flow-through
TEV protease	His6-GS-TEV protease		3, S1	MHHHHHHGSMSGLVPRGSAMGESLFKGPRDYNPISSTICHLTNESDGHTTSLYGIGFGPFIITNKHLFRRNNGTLLVQSLHGVFKVKDTTTLQQHLIDGRDMMIIRMPKDFPPFPQKLKFREPQREERICLVTTNFQAKSMSSMVSDTSCTFPSSDGIFWKHWIQTKDGQCGSPLVSTRDGFIVGIHSASNFTNTNNYFTSVPKNFMELLTNQEAQQWVSGWRLNADSVLWGGHKVFMSKPEEPFQPVKEATQLMNELVYSQ	pET30b	Ni2+ column
Ubiquitin (N-terminal conjugation)	His6-TEV-CnTag(P1A)-AAAGA-Ubiquitin	The TEV tag was removed for all experiments	4, 6, S2	MHHHHHHENLYFQAGAFDADPLVVEIAAAGAMKIKIVPAVGGGSPLELEVAPNATVGAVRTKVCAMKKLPPDTTRLTYKGRALKDTETLESLGVADGDKFVLITRTVGG	pET30b	Ni2+ column -> Dialysis / TEV cleavage -> Ni2+ column flow-through
Pro-Ubiquitin (N-terminal conjugation)	Pro-CnTag(P1A)-AAAGA-Ubiquitin-His6		S2	MPAGAFDADPLVVEIAAAGAMKIKIVPAVGGGSPLELEVAPNATVGAVRTKVCAMKKLPPDTTRLTYKGRALKDTETLESLGVADGDKFVLITRTVGGHHHHHH	pET30b	Ni2+ column
Peptide for in-gel fluorescence detection	-		S5, S7	PGAFDADPLVVEISEEGE-Cy5.5	-	-
HC-Strep	αHER2-Heavy chain-RELASKD-CnTag-SEEGEGSG-Strep		4, S5, S6, S7	MDWTWRFLFVVAAATGVQSEVQLVESGGGLVQPGGSLRLSCAASGFNIKDTYIHWVRQAPGKGLEWVARIYPTNGYTRYADSVKGRFTISADTSKNTAYLQMNSLRAEDTAVYYCSRWGGDGFYAMDYWGQGTLVTVSSASTKGPSVFPLAPSSKSTSGGTAALGCLVKDYFPEPVTVSWNSGALTSGVHTFPAVLQSSGLYSLSSVVTVPSSSLGTQTYICNVNHKPSNTKVDKKVEPKSCDKTHTCPPCPAPELLGGPSVFLFPPKPKDTLMISRTPEVTCVVVDVSHEDPEVKFNWYVDGVEVHNAKTKPREEQYNSTYRVVSVLTVLHQDWLNGKEYKCKVSNKALPAPIEKTISKAKGQPREPQVYTLPPSREEMTKNQVSLTCLVKGFYPSDI…	pcDNA3.1	Streptavidin column
LC-Strep	αHER2-Light chain-RELASKD-CnTag-SEEGEGSG-Strep		4, S5, S6, S7	MDMRVPAQLLGLLLLWLSGARCDIQMTQSPSSLSASVGDRVTITCRASQDVNTAVAWYQQKPGKAPKLLIYSASFLYSGVPSRFSGSRSGTDFTLTISSLQPEDFATYYCQQHYTTPPTFGQGTKVEIKRTVAAPSVFIFPPSDEQLKSGTASVVCLLNNFYPREAKVQWKVDNALQSGNSQESVTEQDSKDSTYSLSSTLTLSKADYEKHKVYACEVTHQGLSSPVTKSFNRGECRELASKDPGAFDADPLVVEISEEGEGSGWSHPQFEK	pcDNA3.1	Streptavidin column
Peptide for biotinylation	-		S6, S7	AGAFDADPLVVEIK(-Biotin)		-
Ub for cyclization	His6-TEV-CnTag(P1A)-AAAGA-Ubiquitin-RELASKD-CnTag-SE-Strep		5	MHHHHHHENLYFQAGAFDADPLVVEIAAAGAMKIKIVPAVGGGSPLELEVAPNATVGAVRTKVCAMKKLPPDTTRLTYKGRALKDTETLESLGVADGDKFVLITRTVGGRELASKDPGAFDADPLVVEISEWSHPQFEK	pET30b	Ni2+ column -> Dialysis / TEV cleavage -> Ni2+ column flow-through
RELASKDPGAFDADPLVVEI	-		S8	RELASKDPGAFDADPLVVEI	-	-
ELASKDPGAFDADPLVVEI	-		S8	ELASKDPGAFDADPLVVEI	-	-
LASKDPGAFDADPLVVEI	-		S8	LASKDPGAFDADPLVVEI	-	-
Ub (C-terminal conjugation, C-His)	Ub-RELASKD-CnTag-His6		6	MKIKIVPAVGGGSPLELEVAPNATVGAVRTKVCAMKKLPPDTTRLTYKGRALKDTETLESLGVADGDKFVLITRTVGGRELASKDPGAFDADPLVVEIHHHHHH	pET30b	Ni2+ column
Ub (C-terminal conjugation, N-Strep)	Strep-Ub-RELASKD-CnTag		6	MWSHPQFEKGSMKIKIVPAVGGGSPLELEVAPNATVGAVRTKVCAMKKLPPDTTRLTYKGRALKDTETLESLGVADGDKFVLITRTVGGRELASKDPGAFDADPLVVEI	pET30b	Streptavidin column
			Note: Figures S1 - S8 are named "Appendix 1 - Figure 1 - 8" in the Version of Record
